# Supplementary material for: A burst in T cell receptor translation mediated by eIF3 interactions with T cell receptor mRNAs
Source: bioRxiv preprint, doi:10.1101/2019.12.20.885558, version 3 (2020-10-21)
Supplement: Supplementary Table 2 [file 885558_file03.xlsx]

## Sheet: Samples
PAR-CLIP Samples	Name of Tab
EIF3A/C/B, Activated, Replicate 1	APA_REP1
EIF3A/C/B, Activated, Replicate 2	APA_REP2
EIF3B/C, Activated, Replicate 1	APB_REP1
EIF3B/C, Activated, Replicate 2	APB_REP2
EIF3D/L, Activated, Replicate 1	APD_REP1
EIF3D/L, Activated, Replicate 2	APD_REP2
EIF3F/E, Activated, Replicate 1	AP1_REP1
EIF3F/E, Activated, Replicate 2	AP1_REP2
EIF3G/E/F, Activated, Replicate 1	AP2_REP1
EIF3G/E/F, Activated, Replicate 2	AP2_REP2
EIF3A/C/B, Not activated, Replicate 1	NPA_REP1
EIF3A/C/B, Not activated, Replicate 2	NPA_REP2
EIF3B/C, Not activated, Replicate 1	NPB_REP1
EIF3B/C, Not activated, Replicate 2	NPB_REP2
EIF3D/L, Not activated, Replicate 1	NPD_REP1
EIF3D/L, Not activated, Replicate 2	NPD_REP2
EIF3F/E, Not activated, Replicate 1	NP1_REP1
EIF3F/E, Not activated, Replicate 2	NP1_REP2
EIF3G/E/F, Not activated, Replicate 1	NP2_REP1
EIF3G/E/F, Not activated, Replicate 2	NP2_REP2

## Sheet: APA_REP1
Summary Stats	APA_REP1
Reads	20235807(100%)
Filtered Total	202094(1.00%)
Quality	101047(0.50%)
Length <20 nts	101047(0.50%)
3' Adapter	101047(0.50%)
5' Adapter	101047(0.50%)
19 nt Marker	101047(0.50%)
24 nt Marker	101047(0.50%)
Post-Processing	20033713(99.00%)
Uniquely Aligned Reads	1148037(5.73%)
Clusters	12806
Groups	29037
Reads Level	Total	T2C Fraction	Conv Spec	G Fraction	Red Seq Fraction	Red Copy Fraction
3'utr	110549	0.82	1.22	0.24	0.05	0.12
3'utr-intron	151	0.8	1.24	0.49	0.08	0.19
3prime_overlapping_ncrna	25	0.56	0.3	0.12	0.04	0.08
5'utr	223853	0.79	1.05	0.33	0.16	0.39
5'utr-coding	37	0.84	1.49	0.11	0.06	0.19
5'utr-intron	4369	0.83	1.13	0.48	0.13	0.32
IG_C_gene	101	0.55	0.18	0.1	0.04	0.16
IG_C_pseudogene	7	0.71	0.22	0.57	0.5	0.71
IG_V_gene	4	0.25	-0.6	0	0	0
IG_V_pseudogene	2	0	0	0	0	0
Mt_rRNA	42	0.64	0.59	0.21	0.02	0.05
Mt_tRNA	32	0.62	0.6	0.09	0.03	0.06
NoAnnotation	331552	0.33	-0.04	0.36	0.11	0.42
TEC	405	0.63	0.39	0.35	0.06	0.12
TR_C_gene	1753	0.81	1.11	0.43	0.12	0.31
TR_V_pseudogene	3	1	0.48	0	0	0
antisense	16867	0.53	0.28	0.26	0.08	0.34
coding	202117	0.79	1.04	0.28	0.08	0.21
coding-intron	3041	0.78	0.86	0.47	0.07	0.19
intron	112978	0.53	0.25	0.29	0.07	0.2
intron-3'utr	330	0.75	0.84	0.31	0.07	0.17
intron-5'utr	1305	0.77	1.05	0.29	0.12	0.3
intron-coding	2832	0.73	0.74	0.23	0.04	0.11
known_ncrna	14	0.86	1.08	0.07	0.17	0.29
lincRNA_exon	12585	0.65	0.71	0.43	0.09	0.53
lincRNA_exon-lincRNA_intron	246	0.85	1.04	0.48	0.08	0.29
lincRNA_intron	32661	0.16	-0.13	0.52	0.18	0.73
lincRNA_intron-lincRNA_exon	113	0.72	0.63	0.25	0.03	0.05
miRNA	18853	0.65	0.79	0.16	0.39	0.88
misc_RNA	383	0.65	0.92	0.28	0.13	0.33
non_stop_decay	4	0.5	0	0.25	0	0
nonsense_mediated_decay	3947	0.68	0.61	0.29	0.09	0.28
polymorphic_pseudogene	1	0	0	0	0	0
processed_pseudogene	9806	0.68	0.77	0.25	0.09	0.25
processed_transcript	19251	0.65	0.62	0.32	0.1	0.33
protein_coding	6	0.83	0.7	0.17	0.2	0.33
pseudogene	17	0.65	0.34	0.65	0	0
rRNA	801	0.2	-0.37	0.15	0.28	0.74
retained_intron	3030	0.7	0.68	0.34	0.08	0.2
sense_intronic	160	0.72	0.62	0.34	0.09	0.21
sense_overlapping	590	0.62	0.47	0.32	0.08	0.19
snRNA	3780	0.6	0.71	0.23	0.2	0.45
snoRNA	1440	0.75	1.18	0.27	0.22	0.55
start_codon	20869	0.8	1.17	0.3	0.12	0.31
stop_codon	3532	0.84	1.26	0.24	0.05	0.12
transcribed_processed_pseudogene	215	0.47	0.46	0.44	0.1	0.4
transcribed_unprocessed_pseudogene	1035	0.73	0.71	0.12	0.12	0.45
translated_processed_pseudogene	1	1	0	1	0	0
unitary_pseudogene	56	0.41	-0.04	0.18	0.08	0.14
unprocessed_pseudogene	2286	0.66	0.6	0.34	0.1	0.25
Cluster Level	Total	T2C Fraction	Conv Spec	G Fraction	Red Seq Fraction	Red Copy Fraction
3'utr	1434	0.86	0.93	0.26	0.11	0.21
3'utr-intron	1	1	0.9	0	0	0
3prime_overlapping_ncrna	0	-	-	-	-	-
5'utr	4352	0.85	1	0.33	0.17	0.32
5'utr-coding	4	0.88	1.38	0.14	0.17	0.33
5'utr-intron	257	0.86	1.03	0.39	0.15	0.3
IG_C_gene	0	-	-	-	-	-
IG_C_pseudogene	0	-	-	-	-	-
IG_V_gene	0	-	-	-	-	-
IG_V_pseudogene	0	-	-	-	-	-
Mt_rRNA	0	-	-	-	-	-
Mt_tRNA	0	-	-	-	-	-
NoAnnotation	1080	0.82	0.95	0.33	0.2	0.38
TEC	4	0.88	0.92	0.55	0.18	0.33
TR_C_gene	26	0.83	1.08	0.42	0.12	0.25
TR_V_pseudogene	0	-	-	-	-	-
antisense	93	0.86	0.92	0.32	0.17	0.31
coding	2736	0.86	0.94	0.28	0.15	0.28
coding-intron	75	0.86	0.99	0.31	0.13	0.25
intron	585	0.85	0.94	0.29	0.16	0.3
intron-3'utr	4	0.83	0.9	0.19	0.05	0.14
intron-5'utr	50	0.83	1	0.43	0.16	0.31
intron-coding	42	0.88	0.96	0.21	0.15	0.27
known_ncrna	1	0.86	0.78	0	0.17	0.29
lincRNA_exon	110	0.86	0.94	0.28	0.14	0.27
lincRNA_exon-lincRNA_intron	22	0.83	1.05	0.27	0.12	0.26
lincRNA_intron	35	0.77	1.02	0.48	0.28	0.54
lincRNA_intron-lincRNA_exon	7	0.85	1.06	0.23	0.1	0.23
miRNA	136	0.73	0.95	0.16	0.42	0.72
misc_RNA	10	0.73	0.84	0.32	0.33	0.45
non_stop_decay	0	-	-	-	-	-
nonsense_mediated_decay	62	0.86	0.97	0.3	0.17	0.32
polymorphic_pseudogene	0	-	-	-	-	-
processed_pseudogene	123	0.82	0.95	0.27	0.25	0.46
processed_transcript	235	0.86	1.01	0.35	0.18	0.34
protein_coding	0	-	-	-	-	-
pseudogene	0	-	-	-	-	-
rRNA	3	0.41	0.86	0.22	0.24	0.5
retained_intron	58	0.84	0.94	0.32	0.15	0.29
sense_intronic	4	0.9	0.91	0.56	0.16	0.34
sense_overlapping	5	0.89	1	0.46	0.16	0.34
snRNA	35	0.69	1.05	0.26	0.18	0.38
snoRNA	12	0.81	1.21	0.15	0.29	0.63
start_codon	1050	0.84	1.03	0.33	0.15	0.31
stop_codon	122	0.87	1.01	0.31	0.11	0.23
transcribed_processed_pseudogene	0	-	-	-	-	-
transcribed_unprocessed_pseudogene	9	0.88	0.87	0.22	0.28	0.51
translated_processed_pseudogene	0	-	-	-	-	-
unitary_pseudogene	0	-	-	-	-	-
unprocessed_pseudogene	24	0.84	1	0.45	0.24	0.46
Group Level	Total	T2C Fraction	Conv Spec	G Fraction	Red Seq Fraction	Red Copy Fraction
3'utr	3287	0.82	0.7	0.27	0.1	0.17
3'utr-intron	2	1	0.8	0	0	0
3prime_overlapping_ncrna	0	-	-	-	-	-
5'utr	6869	0.78	0.75	0.32	0.16	0.29
5'utr-coding	6	0.84	1.1	0.24	0.13	0.25
5'utr-intron	468	0.82	0.86	0.41	0.14	0.26
IG_C_gene	3	0.2	0	0.33	0.78	0.87
IG_C_pseudogene	1	0.71	0.22	0.57	0.5	0.71
IG_V_gene	0	-	-	-	-	-
IG_V_pseudogene	0	-	-	-	-	-
Mt_rRNA	2	0.55	0.03	0.45	0.1	0.17
Mt_tRNA	2	0.88	0.5	0.12	0.07	0.12
NoAnnotation	5227	0.39	0.27	0.36	0.36	0.53
TEC	7	0.75	0.65	0.43	0.22	0.37
TR_C_gene	35	0.76	0.8	0.44	0.12	0.21
TR_V_pseudogene	0	-	-	-	-	-
antisense	339	0.59	0.46	0.32	0.29	0.41
coding	5898	0.78	0.66	0.29	0.15	0.25
coding-intron	218	0.79	0.69	0.38	0.15	0.26
intron	2076	0.55	0.43	0.32	0.28	0.41
intron-3'utr	8	0.73	0.72	0.25	0.08	0.16
intron-5'utr	117	0.78	0.75	0.31	0.13	0.24
intron-coding	157	0.75	0.64	0.23	0.12	0.21
known_ncrna	2	0.93	0.74	0	0.21	0.34
lincRNA_exon	248	0.77	0.66	0.29	0.15	0.26
lincRNA_exon-lincRNA_intron	38	0.8	0.93	0.32	0.12	0.26
lincRNA_intron	216	0.33	0.06	0.43	0.33	0.57
lincRNA_intron-lincRNA_exon	15	0.82	0.84	0.23	0.1	0.2
miRNA	207	0.64	0.69	0.17	0.4	0.68
misc_RNA	24	0.74	0.69	0.27	0.33	0.43
non_stop_decay	0	-	-	-	-	-
nonsense_mediated_decay	141	0.68	0.63	0.34	0.18	0.31
polymorphic_pseudogene	0	-	-	-	-	-
processed_pseudogene	335	0.7	0.6	0.27	0.22	0.38
processed_transcript	572	0.68	0.62	0.34	0.21	0.34
protein_coding	0	-	-	-	-	-
pseudogene	0	-	-	-	-	-
rRNA	19	0.26	0.29	0.23	0.37	0.56
retained_intron	119	0.72	0.63	0.3	0.17	0.27
sense_intronic	5	0.87	0.82	0.63	0.16	0.32
sense_overlapping	17	0.68	0.57	0.36	0.22	0.32
snRNA	71	0.54	0.61	0.19	0.21	0.39
snoRNA	16	0.76	0.82	0.24	0.23	0.43
start_codon	1874	0.8	0.85	0.32	0.14	0.27
stop_codon	289	0.82	0.77	0.25	0.1	0.19
transcribed_processed_pseudogene	5	0.41	0.6	0.54	0.58	0.79
transcribed_unprocessed_pseudogene	23	0.83	0.71	0.13	0.3	0.45
translated_processed_pseudogene	0	-	-	-	-	-
unitary_pseudogene	1	1	0.7	0	0.67	0.8
unprocessed_pseudogene	78	0.71	0.58	0.38	0.26	0.42

## Sheet: APA_REP2
Summary Stats	APA_REP2
Reads	20806441(100%)
Filtered Total	214132(1.03%)
Quality	107066(0.51%)
Length <20 nts	107066(0.51%)
3' Adapter	107066(0.51%)
5' Adapter	107066(0.51%)
19 nt Marker	107066(0.51%)
24 nt Marker	107066(0.51%)
Post-Processing	20592309(98.97%)
Uniquely Aligned Reads	1163754(5.65%)
Clusters	12946
Groups	29275
Reads Level	Total	T2C Fraction	Conv Spec	G Fraction	Red Seq Fraction	Red Copy Fraction
3'utr	112229	0.82	1.21	0.24	0.05	0.12
3'utr-intron	172	0.82	1.11	0.44	0.04	0.12
3prime_overlapping_ncrna	22	0.5	0.09	0	0	0
5'utr	226616	0.79	1.05	0.33	0.15	0.39
5'utr-coding	58	0.81	1.19	0.12	0.17	0.31
5'utr-intron	4431	0.83	1.14	0.49	0.13	0.34
IG_C_gene	106	0.6	0.3	0.11	0.07	0.17
IG_C_pseudogene	3	1	0.48	0.33	0	0
IG_V_gene	5	0.6	0	0	0	0
Mt_rRNA	47	0.62	0.76	0.32	0.04	0.09
Mt_tRNA	30	0.73	1.04	0.1	0	0
NoAnnotation	343873	0.33	-0.04	0.36	0.11	0.43
TEC	413	0.66	0.47	0.37	0.06	0.13
TR_C_gene	1744	0.82	1.17	0.46	0.14	0.32
TR_V_pseudogene	8	0.75	0.48	0	0	0
antisense	15936	0.54	0.29	0.29	0.08	0.29
coding	204913	0.79	1.02	0.28	0.08	0.21
coding-intron	3033	0.78	0.85	0.48	0.06	0.17
intron	113287	0.53	0.26	0.29	0.06	0.18
intron-3'utr	343	0.81	0.93	0.27	0.1	0.25
intron-5'utr	1319	0.76	0.99	0.3	0.11	0.29
intron-coding	2883	0.73	0.72	0.24	0.05	0.11
known_ncrna	13	1	1.11	0	0.25	0.54
lincRNA_exon	12594	0.6	0.63	0.41	0.09	0.53
lincRNA_exon-lincRNA_intron	237	0.76	1.05	0.43	0.08	0.22
lincRNA_intron	28963	0.17	-0.14	0.53	0.18	0.69
lincRNA_intron-lincRNA_exon	123	0.68	0.62	0.25	0.01	0.02
miRNA	18652	0.65	0.79	0.18	0.39	0.88
misc_RNA	389	0.65	0.84	0.33	0.1	0.27
non_stop_decay	4	0.75	0.18	0	0	0
nonsense_mediated_decay	3891	0.66	0.65	0.33	0.09	0.27
polymorphic_pseudogene	1	0	0	0	0	0
processed_pseudogene	9898	0.68	0.77	0.25	0.09	0.25
processed_transcript	19155	0.63	0.56	0.32	0.1	0.31
protein_coding	8	0.75	0.3	0.12	0.2	0.5
pseudogene	17	0.76	0.64	0.71	0	0
rRNA	806	0.18	-0.43	0.13	0.27	0.74
retained_intron	3113	0.69	0.66	0.33	0.08	0.2
sense_intronic	148	0.7	0.54	0.4	0.08	0.21
sense_overlapping	615	0.63	0.49	0.33	0.08	0.2
snRNA	3850	0.62	0.75	0.21	0.2	0.47
snoRNA	1486	0.75	1.19	0.35	0.22	0.55
start_codon	21220	0.8	1.16	0.3	0.12	0.32
stop_codon	3554	0.83	1.2	0.24	0.05	0.12
transcribed_processed_pseudogene	155	0.62	0.4	0.3	0.12	0.28
transcribed_unprocessed_pseudogene	998	0.76	0.73	0.1	0.11	0.4
translated_processed_pseudogene	1	1	0	1	0	0
unitary_pseudogene	60	0.37	-0.09	0.27	0.14	0.27
unprocessed_pseudogene	2332	0.68	0.64	0.37	0.1	0.25
Cluster Level	Total	T2C Fraction	Conv Spec	G Fraction	Red Seq Fraction	Red Copy Fraction
3'utr	1499	0.87	0.92	0.26	0.1	0.19
3'utr-intron	1	0.86	1.08	0.07	0.08	0.14
3prime_overlapping_ncrna	0	-	-	-	-	-
5'utr	4340	0.85	0.99	0.33	0.17	0.32
5'utr-coding	5	0.84	1.23	0.12	0.15	0.27
5'utr-intron	247	0.85	1.05	0.38	0.14	0.29
IG_C_gene	0	-	-	-	-	-
IG_C_pseudogene	0	-	-	-	-	-
IG_V_gene	0	-	-	-	-	-
Mt_rRNA	0	-	-	-	-	-
Mt_tRNA	1	1	0.9	0	0	0
NoAnnotation	1122	0.82	0.95	0.33	0.2	0.37
TEC	3	0.89	1.01	0.57	0.09	0.17
TR_C_gene	28	0.86	1.11	0.47	0.14	0.28
TR_V_pseudogene	0	-	-	-	-	-
antisense	105	0.86	0.92	0.3	0.19	0.34
coding	2768	0.86	0.94	0.28	0.15	0.28
coding-intron	84	0.87	0.98	0.26	0.15	0.28
intron	596	0.86	0.93	0.32	0.16	0.29
intron-3'utr	4	0.86	0.99	0.18	0.16	0.35
intron-5'utr	51	0.81	0.96	0.41	0.13	0.27
intron-coding	37	0.85	0.93	0.22	0.14	0.27
known_ncrna	1	1	0.9	0	0.67	0.88
lincRNA_exon	103	0.85	0.95	0.28	0.16	0.29
lincRNA_exon-lincRNA_intron	22	0.83	1.04	0.26	0.18	0.33
lincRNA_intron	43	0.78	0.96	0.49	0.26	0.48
lincRNA_intron-lincRNA_exon	8	0.87	1.16	0.3	0.12	0.26
miRNA	120	0.74	0.96	0.17	0.45	0.76
misc_RNA	10	0.84	0.99	0.34	0.24	0.49
non_stop_decay	0	-	-	-	-	-
nonsense_mediated_decay	71	0.84	0.94	0.29	0.16	0.3
polymorphic_pseudogene	0	-	-	-	-	-
processed_pseudogene	122	0.83	0.94	0.26	0.23	0.44
processed_transcript	240	0.84	0.98	0.38	0.18	0.35
protein_coding	0	-	-	-	-	-
pseudogene	0	-	-	-	-	-
rRNA	3	0.54	0.95	0.21	0.31	0.61
retained_intron	61	0.87	0.96	0.31	0.16	0.29
sense_intronic	3	0.84	0.82	0.55	0.14	0.38
sense_overlapping	3	0.88	1.26	0.49	0.19	0.39
snRNA	37	0.7	1.04	0.23	0.22	0.43
snoRNA	11	0.77	1.15	0.16	0.3	0.63
start_codon	1031	0.84	1.03	0.3	0.15	0.3
stop_codon	127	0.86	0.96	0.26	0.11	0.22
transcribed_processed_pseudogene	0	-	-	-	-	-
transcribed_unprocessed_pseudogene	14	0.91	0.86	0.15	0.21	0.37
translated_processed_pseudogene	0	-	-	-	-	-
unitary_pseudogene	0	-	-	-	-	-
unprocessed_pseudogene	25	0.85	0.95	0.4	0.28	0.52
Group Level	Total	T2C Fraction	Conv Spec	G Fraction	Red Seq Fraction	Red Copy Fraction
3'utr	3325	0.83	0.71	0.26	0.09	0.16
3'utr-intron	2	0.88	0.85	0.03	0.1	0.19
3prime_overlapping_ncrna	1	0	0	0	0	0
5'utr	6959	0.78	0.74	0.33	0.16	0.29
5'utr-coding	7	0.86	1.03	0.25	0.1	0.19
5'utr-intron	459	0.82	0.87	0.4	0.13	0.26
IG_C_gene	1	0	0	1	1	1
IG_C_pseudogene	0	-	-	-	-	-
IG_V_gene	0	-	-	-	-	-
Mt_rRNA	1	0.6	0.48	0.4	0.11	0.2
Mt_tRNA	3	0.72	0.56	0.05	0	0
NoAnnotation	5252	0.39	0.27	0.35	0.35	0.52
TEC	9	0.84	0.63	0.59	0.17	0.29
TR_C_gene	33	0.81	0.95	0.49	0.14	0.24
TR_V_pseudogene	1	0.8	0.6	0	0	0
antisense	342	0.61	0.48	0.34	0.25	0.38
coding	5995	0.78	0.66	0.3	0.14	0.24
coding-intron	223	0.79	0.68	0.32	0.13	0.23
intron	2093	0.56	0.43	0.33	0.27	0.4
intron-3'utr	7	0.88	0.89	0.31	0.11	0.21
intron-5'utr	108	0.74	0.69	0.32	0.13	0.23
intron-coding	160	0.76	0.64	0.22	0.12	0.21
known_ncrna	1	1	0.9	0	0.67	0.88
lincRNA_exon	230	0.77	0.67	0.29	0.15	0.26
lincRNA_exon-lincRNA_intron	38	0.81	0.93	0.29	0.16	0.29
lincRNA_intron	215	0.35	0.09	0.47	0.35	0.6
lincRNA_intron-lincRNA_exon	18	0.8	0.86	0.38	0.09	0.19
miRNA	210	0.63	0.65	0.17	0.41	0.68
misc_RNA	20	0.74	0.71	0.42	0.2	0.37
non_stop_decay	0	-	-	-	-	-
nonsense_mediated_decay	147	0.69	0.62	0.31	0.16	0.28
polymorphic_pseudogene	0	-	-	-	-	-
processed_pseudogene	339	0.71	0.61	0.27	0.23	0.39
processed_transcript	549	0.67	0.61	0.34	0.22	0.37
protein_coding	0	-	-	-	-	-
pseudogene	0	-	-	-	-	-
rRNA	19	0.2	0.09	0.17	0.32	0.55
retained_intron	123	0.72	0.64	0.32	0.15	0.25
sense_intronic	4	0.88	0.81	0.58	0.11	0.28
sense_overlapping	17	0.51	0.46	0.47	0.24	0.34
snRNA	69	0.55	0.62	0.17	0.22	0.4
snoRNA	16	0.7	0.84	0.26	0.24	0.48
start_codon	1876	0.8	0.83	0.31	0.14	0.26
stop_codon	293	0.82	0.76	0.25	0.1	0.18
transcribed_processed_pseudogene	7	0.72	0.78	0.29	0.45	0.66
transcribed_unprocessed_pseudogene	24	0.85	0.71	0.08	0.19	0.34
translated_processed_pseudogene	0	-	-	-	-	-
unitary_pseudogene	1	0.14	-0.6	0.14	0.2	0.43
unprocessed_pseudogene	78	0.71	0.6	0.38	0.26	0.42

## Sheet: APB_REP1
Summary Stats	APB_REP1
Reads	22079514(100%)
Filtered Total	171266(0.78%)
Quality	85633(0.39%)
Length <20 nts	85633(0.39%)
3' Adapter	85633(0.39%)
5' Adapter	85633(0.39%)
19 nt Marker	85633(0.39%)
24 nt Marker	85633(0.39%)
Post-Processing	21908248(99.22%)
Uniquely Aligned Reads	915290(4.18%)
Clusters	9647
Groups	22039
Reads Level	Total	T2C Fraction	Conv Spec	G Fraction	Red Seq Fraction	Red Copy Fraction
3'utr	124991	0.83	1.2	0.25	0.04	0.11
3'utr-intron	109	0.86	1.27	0.51	0.05	0.16
3prime_overlapping_ncrna	17	0.65	0.44	0.29	0	0
5'utr	158571	0.84	1.19	0.34	0.16	0.42
5'utr-coding	15	0.73	0.74	0.33	0	0
5'utr-intron	3163	0.87	1.28	0.47	0.14	0.37
IG_C_gene	109	0.56	0.18	0.1	0.03	0.09
IG_C_pseudogene	3	0.67	0	1	0	0
IG_V_gene	5	0.4	-0.3	0	0	0
IG_V_pseudogene	2	0.5	-0.3	0.5	0	0
Mt_rRNA	15	0.53	0.43	0.27	0.07	0.13
Mt_tRNA	10	0.7	0.54	0.4	0	0
NoAnnotation	261779	0.34	-0.01	0.36	0.08	0.33
TEC	423	0.7	0.61	0.37	0.03	0.08
TR_C_gene	1358	0.86	1.23	0.47	0.13	0.32
TR_V_pseudogene	3	0.33	-0.3	0.67	0	0
antisense	12101	0.56	0.31	0.29	0.06	0.2
coding	155060	0.8	1.06	0.27	0.05	0.14
coding-intron	2273	0.78	0.83	0.49	0.03	0.09
intron	101141	0.57	0.33	0.29	0.04	0.12
intron-3'utr	250	0.8	0.88	0.26	0.05	0.15
intron-5'utr	794	0.87	1.33	0.28	0.12	0.32
intron-coding	2337	0.77	0.79	0.23	0.03	0.07
known_ncrna	8	0.88	0.85	0.25	0.14	0.25
lincRNA_exon	7449	0.68	0.74	0.37	0.08	0.34
lincRNA_exon-lincRNA_intron	109	0.81	1.04	0.42	0.05	0.14
lincRNA_intron	19764	0.21	-0.09	0.48	0.14	0.6
lincRNA_intron-lincRNA_exon	63	0.73	0.55	0.24	0.05	0.11
miRNA	17585	0.67	0.86	0.19	0.4	0.88
misc_RNA	333	0.63	0.96	0.33	0.16	0.39
non_stop_decay	4	0.25	-0.6	0	0.5	0.75
nonsense_mediated_decay	3518	0.74	0.78	0.33	0.08	0.29
processed_pseudogene	6219	0.68	0.76	0.24	0.05	0.14
processed_transcript	15162	0.66	0.62	0.33	0.08	0.25
protein_coding	5	0.6	0	0	0	0
pseudogene	14	0.57	0.6	0.36	0.08	0.14
rRNA	784	0.18	-0.47	0.13	0.29	0.79
retained_intron	2685	0.74	0.77	0.33	0.06	0.15
sense_intronic	162	0.77	0.77	0.3	0.08	0.25
sense_overlapping	598	0.63	0.53	0.29	0.05	0.11
snRNA	1773	0.66	1.01	0.25	0.16	0.39
snoRNA	1066	0.77	1.21	0.25	0.15	0.52
start_codon	7746	0.83	1.25	0.32	0.08	0.22
stop_codon	2810	0.84	1.18	0.24	0.04	0.09
transcribed_processed_pseudogene	124	0.55	0.53	0.44	0.05	0.16
transcribed_unprocessed_pseudogene	794	0.73	0.67	0.12	0.08	0.22
translated_processed_pseudogene	2	0	0	1	0	0
unitary_pseudogene	54	0.39	-0.11	0.11	0.09	0.22
unprocessed_pseudogene	1930	0.68	0.68	0.34	0.07	0.15
Cluster Level	Total	T2C Fraction	Conv Spec	G Fraction	Red Seq Fraction	Red Copy Fraction
3'utr	1723	0.87	0.92	0.27	0.11	0.2
3'utr-intron	2	0.89	0.79	0	0.09	0.18
3prime_overlapping_ncrna	0	-	-	-	-	-
5'utr	3311	0.89	1.05	0.34	0.19	0.36
5'utr-coding	1	0.77	1.08	0.03	0	0
5'utr-intron	167	0.9	1.15	0.43	0.16	0.33
IG_C_gene	0	-	-	-	-	-
IG_C_pseudogene	0	-	-	-	-	-
IG_V_gene	0	-	-	-	-	-
IG_V_pseudogene	0	-	-	-	-	-
Mt_rRNA	0	-	-	-	-	-
Mt_tRNA	0	-	-	-	-	-
NoAnnotation	977	0.84	0.97	0.32	0.21	0.39
TEC	2	1	0.93	0.24	0.08	0.19
TR_C_gene	36	0.87	1.04	0.43	0.12	0.26
TR_V_pseudogene	0	-	-	-	-	-
antisense	61	0.87	0.94	0.29	0.19	0.33
coding	1699	0.86	0.93	0.28	0.14	0.26
coding-intron	33	0.84	0.9	0.36	0.11	0.2
intron	455	0.87	0.94	0.35	0.15	0.28
intron-3'utr	5	0.8	0.79	0.32	0.05	0.13
intron-5'utr	38	0.92	1.18	0.38	0.18	0.36
intron-coding	34	0.87	0.95	0.34	0.12	0.24
known_ncrna	0	-	-	-	-	-
lincRNA_exon	74	0.89	1	0.24	0.17	0.32
lincRNA_exon-lincRNA_intron	5	0.8	0.86	0.22	0.1	0.22
lincRNA_intron	35	0.75	0.88	0.61	0.26	0.47
lincRNA_intron-lincRNA_exon	6	0.87	1.03	0.18	0.14	0.25
miRNA	128	0.75	0.98	0.2	0.43	0.73
misc_RNA	9	0.72	0.81	0.37	0.25	0.45
non_stop_decay	0	-	-	-	-	-
nonsense_mediated_decay	47	0.89	1.01	0.34	0.22	0.42
processed_pseudogene	53	0.82	0.87	0.23	0.28	0.47
processed_transcript	148	0.88	1.04	0.4	0.19	0.37
protein_coding	0	-	-	-	-	-
pseudogene	0	-	-	-	-	-
rRNA	5	0.4	0.79	0.23	0.4	0.68
retained_intron	39	0.87	0.99	0.38	0.13	0.25
sense_intronic	4	0.89	1	0.81	0.2	0.46
sense_overlapping	4	0.84	0.89	0.47	0.09	0.16
snRNA	34	0.74	1.02	0.23	0.16	0.31
snoRNA	13	0.78	1.05	0.17	0.22	0.46
start_codon	377	0.87	1.05	0.31	0.15	0.3
stop_codon	96	0.87	0.96	0.23	0.11	0.21
transcribed_processed_pseudogene	0	-	-	-	-	-
transcribed_unprocessed_pseudogene	6	0.98	0.88	0.07	0.25	0.42
translated_processed_pseudogene	0	-	-	-	-	-
unitary_pseudogene	1	1	0.85	0	0.5	0.86
unprocessed_pseudogene	19	0.9	0.97	0.48	0.26	0.44
Group Level	Total	T2C Fraction	Conv Spec	G Fraction	Red Seq Fraction	Red Copy Fraction
3'utr	3872	0.83	0.7	0.28	0.09	0.16
3'utr-intron	3	0.86	0.63	0	0.06	0.12
3prime_overlapping_ncrna	0	-	-	-	-	-
5'utr	5267	0.83	0.83	0.34	0.18	0.33
5'utr-coding	2	0.66	0.89	0.02	0.14	0.22
5'utr-intron	310	0.86	0.93	0.45	0.15	0.29
IG_C_gene	1	0	0	1	0.5	0.86
IG_C_pseudogene	0	-	-	-	-	-
IG_V_gene	0	-	-	-	-	-
IG_V_pseudogene	0	-	-	-	-	-
Mt_rRNA	0	-	-	-	-	-
Mt_tRNA	0	-	-	-	-	-
NoAnnotation	3790	0.48	0.38	0.37	0.34	0.5
TEC	9	0.7	0.49	0.46	0.33	0.42
TR_C_gene	40	0.83	0.89	0.46	0.15	0.29
TR_V_pseudogene	0	-	-	-	-	-
antisense	227	0.62	0.51	0.31	0.27	0.4
coding	4170	0.79	0.66	0.28	0.13	0.21
coding-intron	116	0.77	0.65	0.34	0.11	0.19
intron	1497	0.64	0.52	0.34	0.24	0.36
intron-3'utr	8	0.8	0.68	0.29	0.03	0.08
intron-5'utr	58	0.86	0.94	0.36	0.18	0.33
intron-coding	125	0.84	0.72	0.22	0.11	0.18
known_ncrna	1	0.8	0.6	0	0	0
lincRNA_exon	172	0.8	0.71	0.29	0.17	0.29
lincRNA_exon-lincRNA_intron	15	0.86	0.91	0.29	0.09	0.19
lincRNA_intron	204	0.38	0.13	0.52	0.33	0.59
lincRNA_intron-lincRNA_exon	8	0.86	0.9	0.24	0.11	0.19
miRNA	210	0.66	0.73	0.16	0.41	0.67
misc_RNA	24	0.67	0.6	0.3	0.27	0.44
non_stop_decay	0	-	-	-	-	-
nonsense_mediated_decay	95	0.76	0.71	0.34	0.2	0.35
processed_pseudogene	162	0.7	0.56	0.29	0.25	0.4
processed_transcript	388	0.73	0.64	0.39	0.21	0.35
protein_coding	0	-	-	-	-	-
pseudogene	1	0.83	0.7	0.5	0	0
rRNA	14	0.34	0.41	0.21	0.47	0.66
retained_intron	92	0.77	0.7	0.3	0.14	0.23
sense_intronic	4	0.89	1	0.81	0.2	0.46
sense_overlapping	12	0.75	0.55	0.34	0.12	0.2
snRNA	56	0.62	0.74	0.22	0.18	0.33
snoRNA	20	0.78	0.84	0.19	0.26	0.46
start_codon	753	0.82	0.85	0.33	0.13	0.25
stop_codon	224	0.83	0.77	0.24	0.1	0.19
transcribed_processed_pseudogene	3	0.17	0.06	0.61	0.42	0.47
transcribed_unprocessed_pseudogene	19	0.78	0.54	0.05	0.27	0.42
translated_processed_pseudogene	0	-	-	-	-	-
unitary_pseudogene	1	1	0.85	0	0.5	0.86
unprocessed_pseudogene	66	0.77	0.62	0.45	0.22	0.35

## Sheet: APB_REP2
Summary Stats	APB_REP2
Reads	22262391(100%)
Filtered Total	176134(0.79%)
Quality	88067(0.40%)
Length <20 nts	88067(0.40%)
3' Adapter	88067(0.40%)
5' Adapter	88067(0.40%)
19 nt Marker	88067(0.40%)
24 nt Marker	88067(0.40%)
Post-Processing	22086257(99.21%)
Uniquely Aligned Reads	906588(4.10%)
Clusters	9506
Groups	21619
Reads Level	Total	T2C Fraction	Conv Spec	G Fraction	Red Seq Fraction	Red Copy Fraction
3'utr	123635	0.83	1.19	0.25	0.04	0.1
3'utr-intron	87	0.84	1.39	0.51	0.12	0.25
3prime_overlapping_ncrna	14	0.29	-0.4	0.29	0	0
5'utr	156793	0.84	1.2	0.34	0.16	0.42
5'utr-coding	21	0.71	0.57	0.33	0	0
5'utr-intron	3076	0.88	1.3	0.47	0.14	0.37
IG_C_gene	115	0.6	0.26	0.04	0.04	0.1
IG_V_gene	5	0.4	-0.18	0	0	0
IG_V_pseudogene	2	0.5	-0.3	0	0	0
Mt_rRNA	14	0.43	0.08	0.36	0	0
Mt_tRNA	5	0.8	0.3	0.2	0	0
NoAnnotation	258978	0.34	-0.02	0.36	0.08	0.33
TEC	422	0.66	0.56	0.36	0.03	0.08
TR_C_gene	1384	0.87	1.27	0.49	0.13	0.32
TR_V_pseudogene	1	1	0	0	0	0
antisense	12162	0.54	0.26	0.3	0.05	0.21
coding	152447	0.8	1.06	0.27	0.05	0.14
coding-intron	2213	0.78	0.81	0.51	0.03	0.09
intron	100762	0.57	0.33	0.29	0.04	0.12
intron-3'utr	224	0.79	0.95	0.23	0.06	0.15
intron-5'utr	749	0.86	1.2	0.29	0.12	0.29
intron-coding	2397	0.75	0.75	0.24	0.03	0.07
known_ncrna	6	1	0.78	0.33	0.2	0.33
lincRNA_exon	8401	0.69	0.73	0.34	0.07	0.41
lincRNA_exon-lincRNA_intron	121	0.79	0.77	0.41	0.06	0.14
lincRNA_intron	19872	0.2	-0.12	0.52	0.14	0.61
lincRNA_intron-lincRNA_exon	66	0.8	0.88	0.27	0.03	0.09
miRNA	17443	0.67	0.88	0.17	0.4	0.88
misc_RNA	298	0.65	0.93	0.29	0.13	0.29
non_stop_decay	2	0.5	0	0	0	0
nonsense_mediated_decay	3304	0.7	0.69	0.31	0.07	0.24
processed_pseudogene	6126	0.69	0.76	0.25	0.05	0.13
processed_transcript	14876	0.66	0.62	0.34	0.08	0.25
protein_coding	10	0.6	0.18	0.2	0	0
pseudogene	9	0.44	0.6	0.33	0.12	0.22
rRNA	733	0.19	-0.45	0.14	0.33	0.8
retained_intron	2790	0.72	0.73	0.32	0.06	0.15
sense_intronic	140	0.79	0.81	0.34	0.08	0.26
sense_overlapping	609	0.66	0.55	0.31	0.04	0.09
snRNA	1738	0.66	0.95	0.24	0.17	0.4
snoRNA	1054	0.77	1.15	0.26	0.16	0.52
start_codon	7587	0.83	1.22	0.33	0.09	0.24
stop_codon	2806	0.84	1.23	0.22	0.04	0.09
transcribed_processed_pseudogene	130	0.58	0.53	0.43	0.08	0.22
transcribed_unprocessed_pseudogene	868	0.77	0.84	0.11	0.1	0.32
unitary_pseudogene	79	0.3	-0.21	0.14	0.04	0.1
unprocessed_pseudogene	2014	0.68	0.65	0.34	0.07	0.16
Cluster Level	Total	T2C Fraction	Conv Spec	G Fraction	Red Seq Fraction	Red Copy Fraction
3'utr	1668	0.86	0.92	0.28	0.1	0.2
3'utr-intron	0	-	-	-	-	-
3prime_overlapping_ncrna	0	-	-	-	-	-
5'utr	3253	0.89	1.06	0.34	0.19	0.37
5'utr-coding	3	0.89	1.18	0.46	0.11	0.26
5'utr-intron	167	0.9	1.1	0.38	0.17	0.35
IG_C_gene	1	1	0.85	0	0.33	0.71
IG_V_gene	0	-	-	-	-	-
IG_V_pseudogene	0	-	-	-	-	-
Mt_rRNA	0	-	-	-	-	-
Mt_tRNA	0	-	-	-	-	-
NoAnnotation	989	0.84	0.97	0.31	0.2	0.37
TEC	1	0.91	0.7	0.36	0.1	0.18
TR_C_gene	27	0.88	1.19	0.5	0.13	0.28
TR_V_pseudogene	0	-	-	-	-	-
antisense	65	0.88	0.9	0.32	0.21	0.39
coding	1667	0.86	0.93	0.27	0.14	0.26
coding-intron	34	0.86	1	0.38	0.1	0.19
intron	466	0.86	0.93	0.34	0.15	0.28
intron-3'utr	8	0.79	0.83	0.17	0.11	0.21
intron-5'utr	40	0.88	1.05	0.41	0.19	0.38
intron-coding	32	0.86	0.93	0.37	0.12	0.22
known_ncrna	0	-	-	-	-	-
lincRNA_exon	71	0.9	0.98	0.26	0.17	0.31
lincRNA_exon-lincRNA_intron	8	0.85	0.94	0.56	0.16	0.32
lincRNA_intron	30	0.77	0.99	0.47	0.27	0.52
lincRNA_intron-lincRNA_exon	3	0.96	1.06	0.26	0.16	0.29
miRNA	118	0.76	1.02	0.19	0.45	0.76
misc_RNA	6	0.84	0.93	0.42	0.28	0.49
non_stop_decay	0	-	-	-	-	-
nonsense_mediated_decay	44	0.87	0.96	0.37	0.19	0.39
processed_pseudogene	50	0.85	0.87	0.28	0.25	0.42
processed_transcript	156	0.89	1.04	0.38	0.21	0.4
protein_coding	0	-	-	-	-	-
pseudogene	0	-	-	-	-	-
rRNA	3	0.55	0.8	0.31	0.29	0.59
retained_intron	41	0.86	0.95	0.28	0.17	0.3
sense_intronic	3	0.94	1.07	0.84	0.26	0.53
sense_overlapping	4	0.88	0.84	0.54	0.16	0.3
snRNA	35	0.7	1.01	0.19	0.17	0.34
snoRNA	13	0.84	1.11	0.17	0.28	0.64
start_codon	367	0.88	1.06	0.32	0.15	0.3
stop_codon	102	0.86	0.98	0.22	0.1	0.19
transcribed_processed_pseudogene	0	-	-	-	-	-
transcribed_unprocessed_pseudogene	9	0.93	0.9	0.04	0.31	0.56
unitary_pseudogene	0	-	-	-	-	-
unprocessed_pseudogene	22	0.89	0.87	0.38	0.17	0.3
Group Level	Total	T2C Fraction	Conv Spec	G Fraction	Red Seq Fraction	Red Copy Fraction
3'utr	3835	0.83	0.7	0.29	0.09	0.15
3'utr-intron	2	1	0.8	0.5	0.12	0.2
3prime_overlapping_ncrna	0	-	-	-	-	-
5'utr	5228	0.83	0.82	0.35	0.18	0.33
5'utr-coding	5	0.91	1.11	0.29	0.12	0.26
5'utr-intron	282	0.87	0.96	0.41	0.17	0.32
IG_C_gene	1	1	0.85	0	0.33	0.71
IG_V_gene	0	-	-	-	-	-
IG_V_pseudogene	0	-	-	-	-	-
Mt_rRNA	0	-	-	-	-	-
Mt_tRNA	0	-	-	-	-	-
NoAnnotation	3774	0.49	0.37	0.35	0.33	0.49
TEC	7	0.74	0.51	0.54	0.24	0.38
TR_C_gene	35	0.86	0.97	0.49	0.11	0.22
TR_V_pseudogene	0	-	-	-	-	-
antisense	214	0.64	0.51	0.33	0.27	0.41
coding	3965	0.79	0.67	0.29	0.13	0.22
coding-intron	125	0.8	0.67	0.37	0.11	0.19
intron	1459	0.64	0.52	0.34	0.25	0.36
intron-3'utr	12	0.8	0.78	0.16	0.09	0.18
intron-5'utr	70	0.88	0.89	0.33	0.16	0.3
intron-coding	131	0.79	0.67	0.27	0.12	0.2
known_ncrna	0	-	-	-	-	-
lincRNA_exon	163	0.81	0.71	0.27	0.18	0.29
lincRNA_exon-lincRNA_intron	18	0.87	0.89	0.5	0.15	0.29
lincRNA_intron	202	0.31	0.04	0.52	0.34	0.6
lincRNA_intron-lincRNA_exon	7	0.82	0.68	0.33	0.13	0.22
miRNA	202	0.64	0.7	0.17	0.42	0.69
misc_RNA	18	0.72	0.62	0.33	0.28	0.43
non_stop_decay	0	-	-	-	-	-
nonsense_mediated_decay	89	0.74	0.69	0.4	0.19	0.35
processed_pseudogene	144	0.71	0.58	0.28	0.23	0.37
processed_transcript	387	0.73	0.67	0.37	0.23	0.37
protein_coding	0	-	-	-	-	-
pseudogene	0	-	-	-	-	-
rRNA	18	0.36	0.31	0.28	0.41	0.69
retained_intron	93	0.8	0.71	0.3	0.15	0.25
sense_intronic	3	0.94	1.07	0.84	0.26	0.53
sense_overlapping	14	0.72	0.52	0.34	0.08	0.15
snRNA	56	0.61	0.71	0.19	0.18	0.32
snoRNA	19	0.8	0.79	0.3	0.2	0.42
start_codon	726	0.83	0.86	0.34	0.14	0.27
stop_codon	216	0.82	0.77	0.22	0.09	0.17
transcribed_processed_pseudogene	5	0.61	0.42	0.67	0.44	0.66
transcribed_unprocessed_pseudogene	27	0.88	0.71	0.13	0.3	0.47
unitary_pseudogene	1	0	0	0	0.33	0.6
unprocessed_pseudogene	66	0.75	0.62	0.47	0.23	0.34

## Sheet: APD_REP1
Summary Stats	APD_REP1
Reads	9578513(100%)
Filtered Total	78930(0.82%)
Quality	39465(0.41%)
Length <20 nts	39465(0.41%)
3' Adapter	39465(0.41%)
5' Adapter	39465(0.41%)
19 nt Marker	39465(0.41%)
24 nt Marker	39465(0.41%)
Post-Processing	9499583(99.18%)
Uniquely Aligned Reads	200340(2.11%)
Clusters	1335
Groups	4065
Reads Level	Total	T2C Fraction	Conv Spec	G Fraction	Red Seq Fraction	Red Copy Fraction
3'utr	22939	0.82	1.14	0.24	0.03	0.08
3'utr-intron	25	0.68	0.93	0.2	0	0
3prime_overlapping_ncrna	1	0	0	0	0	0
5'utr	36972	0.79	1.05	0.33	0.1	0.25
5'utr-coding	7	0.71	0.7	0.43	0	0
5'utr-intron	778	0.84	1.08	0.48	0.1	0.23
IG_C_gene	30	0.43	0	0	0.03	0.07
IG_C_pseudogene	1	1	0	1	0	0
IG_V_gene	1	0	0	0	0	0
Mt_rRNA	2	1	0.3	0	0	0
Mt_tRNA	3	1	0.48	0.67	0	0
NoAnnotation	59386	0.29	-0.1	0.35	0.07	0.28
TEC	69	0.57	0.25	0.48	0.03	0.07
TR_C_gene	203	0.81	0.88	0.48	0.14	0.33
TR_V_gene	120	0.81	1.21	0.41	0.06	0.17
antisense	2740	0.48	0.2	0.31	0.04	0.14
coding	34255	0.79	1	0.27	0.04	0.1
coding-intron	526	0.69	0.68	0.43	0.03	0.08
intron	21427	0.48	0.19	0.29	0.04	0.1
intron-3'utr	64	0.86	0.84	0.17	0.05	0.14
intron-5'utr	197	0.76	0.92	0.25	0.03	0.08
intron-coding	486	0.74	0.73	0.25	0.01	0.03
known_ncrna	1	0	0	0	0	0
lincRNA_exon	1395	0.7	0.77	0.28	0.04	0.13
lincRNA_exon-lincRNA_intron	40	0.85	0.75	0.4	0.03	0.05
lincRNA_intron	4464	0.2	-0.03	0.52	0.13	0.55
lincRNA_intron-lincRNA_exon	25	0.88	1.34	0.04	0.04	0.08
miRNA	1271	0.66	0.78	0.19	0.25	0.57
misc_RNA	46	0.57	0.51	0.28	0.05	0.09
non_stop_decay	4	0.25	-0.6	0.5	0.33	0.5
nonsense_mediated_decay	761	0.64	0.58	0.29	0.06	0.22
processed_pseudogene	1727	0.69	0.71	0.24	0.04	0.11
processed_transcript	3327	0.64	0.56	0.34	0.07	0.2
pseudogene	3	0.67	0	0	0	0
rRNA	322	0.13	-0.23	0.06	0.36	0.81
retained_intron	536	0.71	0.66	0.34	0.05	0.13
sense_intronic	24	0.62	0.33	0.46	0	0
sense_overlapping	106	0.6	0.43	0.32	0.03	0.07
snRNA	767	0.59	0.76	0.19	0.14	0.35
snoRNA	285	0.82	1.42	0.18	0.16	0.48
start_codon	3768	0.85	1.36	0.3	0.09	0.22
stop_codon	628	0.84	1.19	0.26	0.02	0.08
transcribed_processed_pseudogene	29	0.55	0.2	0.41	0.04	0.07
transcribed_unprocessed_pseudogene	173	0.69	0.58	0.1	0.06	0.27
unitary_pseudogene	17	0.24	-0.35	0.12	0.06	0.12
unprocessed_pseudogene	389	0.61	0.56	0.3	0.06	0.14
Cluster Level	Total	T2C Fraction	Conv Spec	G Fraction	Red Seq Fraction	Red Copy Fraction
3'utr	99	0.86	0.9	0.22	0.17	0.29
3'utr-intron	0	-	-	-	-	-
3prime_overlapping_ncrna	0	-	-	-	-	-
5'utr	622	0.86	0.95	0.33	0.2	0.38
5'utr-coding	1	0.71	0.7	0.14	0	0
5'utr-intron	24	0.88	1.01	0.39	0.14	0.28
IG_C_gene	0	-	-	-	-	-
IG_C_pseudogene	0	-	-	-	-	-
IG_V_gene	0	-	-	-	-	-
Mt_rRNA	0	-	-	-	-	-
Mt_tRNA	0	-	-	-	-	-
NoAnnotation	132	0.8	0.96	0.38	0.3	0.52
TEC	0	-	-	-	-	-
TR_C_gene	12	0.84	0.91	0.48	0.12	0.21
TR_V_gene	0	-	-	-	-	-
antisense	4	0.77	0.89	0.36	0.19	0.36
coding	159	0.86	0.9	0.3	0.2	0.36
coding-intron	4	0.9	0.95	0.43	0.26	0.43
intron	35	0.87	0.93	0.32	0.3	0.46
intron-3'utr	1	1	0.85	0	0.67	0.86
intron-5'utr	7	0.86	1	0.36	0.12	0.21
intron-coding	0	-	-	-	-	-
known_ncrna	0	-	-	-	-	-
lincRNA_exon	4	0.96	0.92	0.42	0.22	0.39
lincRNA_exon-lincRNA_intron	2	0.86	0.65	0.08	0.14	0.22
lincRNA_intron	6	0.74	0.91	0.37	0.32	0.74
lincRNA_intron-lincRNA_exon	0	-	-	-	-	-
miRNA	29	0.77	0.9	0.21	0.39	0.65
misc_RNA	0	-	-	-	-	-
non_stop_decay	0	-	-	-	-	-
nonsense_mediated_decay	6	0.87	0.9	0.19	0.25	0.48
processed_pseudogene	5	0.93	0.95	0.2	0.42	0.68
processed_transcript	32	0.85	0.9	0.42	0.26	0.44
pseudogene	0	-	-	-	-	-
rRNA	0	-	-	-	-	-
retained_intron	5	0.87	0.89	0.5	0.33	0.51
sense_intronic	0	-	-	-	-	-
sense_overlapping	0	-	-	-	-	-
snRNA	12	0.79	0.96	0.16	0.12	0.26
snoRNA	11	0.88	1.02	0.21	0.32	0.59
start_codon	112	0.86	1	0.31	0.17	0.33
stop_codon	9	0.85	0.95	0.19	0.18	0.34
transcribed_processed_pseudogene	0	-	-	-	-	-
transcribed_unprocessed_pseudogene	0	-	-	-	-	-
unitary_pseudogene	0	-	-	-	-	-
unprocessed_pseudogene	2	0.93	1.1	0.39	0.41	0.63
Group Level	Total	T2C Fraction	Conv Spec	G Fraction	Red Seq Fraction	Red Copy Fraction
3'utr	328	0.79	0.61	0.25	0.17	0.28
3'utr-intron	1	0.6	0.48	0.2	0	0
3prime_overlapping_ncrna	0	-	-	-	-	-
5'utr	1406	0.81	0.71	0.33	0.2	0.33
5'utr-coding	1	0.71	0.7	0.14	0	0
5'utr-intron	57	0.84	0.81	0.43	0.14	0.27
IG_C_gene	0	-	-	-	-	-
IG_C_pseudogene	0	-	-	-	-	-
IG_V_gene	0	-	-	-	-	-
Mt_rRNA	0	-	-	-	-	-
Mt_tRNA	0	-	-	-	-	-
NoAnnotation	840	0.36	0.25	0.4	0.43	0.61
TEC	0	-	-	-	-	-
TR_C_gene	22	0.84	0.76	0.44	0.15	0.23
TR_V_gene	0	-	-	-	-	-
antisense	30	0.42	0.34	0.33	0.43	0.59
coding	531	0.77	0.61	0.3	0.21	0.33
coding-intron	11	0.75	0.65	0.42	0.37	0.5
intron	191	0.47	0.38	0.35	0.43	0.57
intron-3'utr	3	0.78	0.6	0.07	0.22	0.29
intron-5'utr	15	0.8	0.68	0.41	0.08	0.15
intron-coding	2	0.85	0.59	0	0.18	0.31
known_ncrna	0	-	-	-	-	-
lincRNA_exon	24	0.7	0.48	0.32	0.19	0.32
lincRNA_exon-lincRNA_intron	4	0.9	0.73	0.18	0.14	0.22
lincRNA_intron	92	0.16	-0.06	0.54	0.34	0.58
lincRNA_intron-lincRNA_exon	1	1	1.49	0.9	0.14	0.81
miRNA	66	0.64	0.56	0.14	0.33	0.54
misc_RNA	2	0.65	0.39	0.08	0.1	0.17
non_stop_decay	0	-	-	-	-	-
nonsense_mediated_decay	17	0.71	0.63	0.32	0.26	0.41
processed_pseudogene	21	0.8	0.66	0.31	0.35	0.52
processed_transcript	79	0.71	0.62	0.37	0.33	0.45
pseudogene	0	-	-	-	-	-
rRNA	6	0.26	0.12	0.29	0.47	0.8
retained_intron	11	0.74	0.66	0.54	0.23	0.39
sense_intronic	1	0.8	0.6	1	0	0
sense_overlapping	1	1	0.7	0.2	0.33	0.6
snRNA	37	0.58	0.49	0.18	0.14	0.27
snoRNA	13	0.86	0.94	0.15	0.28	0.53
start_codon	227	0.83	0.81	0.3	0.16	0.29
stop_codon	16	0.84	0.83	0.27	0.19	0.31
transcribed_processed_pseudogene	0	-	-	-	-	-
transcribed_unprocessed_pseudogene	2	0.88	0.63	0	0.3	0.6
unitary_pseudogene	0	-	-	-	-	-
unprocessed_pseudogene	7	0.6	0.47	0.47	0.42	0.61

## Sheet: APD_REP2
Summary Stats	APD_REP2
Reads	11416979(100%)
Filtered Total	124528(1.09%)
Quality	62264(0.55%)
Length <20 nts	62264(0.55%)
3' Adapter	62264(0.55%)
5' Adapter	62264(0.55%)
19 nt Marker	62264(0.55%)
24 nt Marker	62264(0.55%)
Post-Processing	11292451(98.91%)
Uniquely Aligned Reads	249762(2.21%)
Clusters	1888
Groups	5376
Reads Level	Total	T2C Fraction	Conv Spec	G Fraction	Red Seq Fraction	Red Copy Fraction
3'utr	28501	0.83	1.17	0.24	0.03	0.09
3'utr-intron	42	0.86	1.26	0.4	0.08	0.14
3prime_overlapping_ncrna	2	0.5	0	0	0	0
5'utr	46392	0.8	1.05	0.33	0.1	0.27
5'utr-coding	3	1	0.48	0	0	0
5'utr-intron	939	0.83	1.08	0.51	0.12	0.26
IG_C_gene	19	0.47	0.11	0.11	0	0
IG_V_gene	2	0.5	-0.3	0.5	0	0
IG_V_pseudogene	2	0.5	-0.3	0	0	0
Mt_rRNA	7	0.71	0.7	0.43	0	0
Mt_tRNA	6	0.5	0.48	0.17	0	0
NoAnnotation	72825	0.3	-0.1	0.34	0.07	0.27
TEC	105	0.7	0.67	0.33	0.04	0.09
TR_C_gene	256	0.79	0.92	0.48	0.1	0.3
TR_V_gene	191	0.86	1.14	0.47	0.12	0.29
antisense	3406	0.48	0.22	0.31	0.05	0.16
coding	42785	0.79	0.99	0.27	0.04	0.11
coding-intron	637	0.72	0.73	0.47	0.03	0.07
intron	26502	0.49	0.2	0.3	0.04	0.12
intron-3'utr	80	0.76	0.79	0.23	0.08	0.15
intron-5'utr	224	0.83	1.23	0.27	0.06	0.12
intron-coding	627	0.74	0.77	0.23	0.02	0.04
known_ncrna	1	0	0	0	0	0
lincRNA_exon	1681	0.69	0.68	0.29	0.04	0.14
lincRNA_exon-lincRNA_intron	53	0.81	0.93	0.32	0.02	0.04
lincRNA_intron	6725	0.17	-0.03	0.58	0.14	0.63
lincRNA_intron-lincRNA_exon	31	0.77	0.9	0.06	0	0
miRNA	1606	0.64	0.81	0.21	0.27	0.62
misc_RNA	74	0.72	0.95	0.2	0.09	0.2
non_stop_decay	2	0	0	0.5	0	0
nonsense_mediated_decay	955	0.66	0.61	0.32	0.07	0.23
polymorphic_pseudogene	2	1	0.3	0	0	0
processed_pseudogene	2162	0.69	0.73	0.23	0.05	0.12
processed_transcript	4106	0.63	0.55	0.32	0.06	0.2
pseudogene	3	1	0.48	0.33	0	0
rRNA	369	0.15	-0.11	0.07	0.32	0.8
retained_intron	658	0.68	0.62	0.31	0.04	0.1
sense_intronic	36	0.67	0.6	0.36	0.06	0.11
sense_overlapping	144	0.65	0.5	0.33	0.04	0.1
snRNA	1016	0.57	0.81	0.19	0.17	0.42
snoRNA	334	0.79	1.14	0.26	0.19	0.45
start_codon	4730	0.85	1.34	0.28	0.1	0.24
stop_codon	815	0.84	1.18	0.24	0.03	0.06
transcribed_processed_pseudogene	45	0.49	0.2	0.33	0.06	0.24
transcribed_unprocessed_pseudogene	163	0.74	0.66	0.13	0.07	0.21
unitary_pseudogene	19	0.32	-0.3	0.11	0	0
unprocessed_pseudogene	479	0.67	0.65	0.33	0.06	0.13
Cluster Level	Total	T2C Fraction	Conv Spec	G Fraction	Red Seq Fraction	Red Copy Fraction
3'utr	171	0.87	0.9	0.25	0.18	0.31
3'utr-intron	0	-	-	-	-	-
3prime_overlapping_ncrna	0	-	-	-	-	-
5'utr	869	0.87	0.97	0.34	0.19	0.36
5'utr-coding	0	-	-	-	-	-
5'utr-intron	37	0.87	0.95	0.42	0.2	0.35
IG_C_gene	0	-	-	-	-	-
IG_V_gene	0	-	-	-	-	-
IG_V_pseudogene	0	-	-	-	-	-
Mt_rRNA	0	-	-	-	-	-
Mt_tRNA	0	-	-	-	-	-
NoAnnotation	188	0.82	0.97	0.39	0.28	0.49
TEC	0	-	-	-	-	-
TR_C_gene	11	0.87	0.99	0.53	0.14	0.28
TR_V_gene	0	-	-	-	-	-
antisense	6	0.92	1.02	0.2	0.23	0.43
coding	244	0.86	0.92	0.3	0.2	0.36
coding-intron	5	0.9	0.95	0.32	0.23	0.37
intron	57	0.87	0.95	0.32	0.25	0.4
intron-3'utr	2	0.81	0.68	0.05	0.2	0.29
intron-5'utr	10	0.85	0.84	0.43	0.09	0.18
intron-coding	2	0.84	0.82	0.11	0.04	0.07
known_ncrna	0	-	-	-	-	-
lincRNA_exon	3	0.9	0.72	0	0.37	0.5
lincRNA_exon-lincRNA_intron	3	0.86	0.88	0.08	0.13	0.22
lincRNA_intron	10	0.69	0.99	0.57	0.41	0.71
lincRNA_intron-lincRNA_exon	1	0.82	0.95	0.73	0	0
miRNA	32	0.77	0.94	0.21	0.42	0.68
misc_RNA	2	0.86	0.8	0.14	0.46	0.58
non_stop_decay	0	-	-	-	-	-
nonsense_mediated_decay	6	0.88	0.92	0.26	0.27	0.44
polymorphic_pseudogene	0	-	-	-	-	-
processed_pseudogene	8	0.88	0.92	0.23	0.28	0.53
processed_transcript	36	0.88	0.94	0.42	0.22	0.38
pseudogene	0	-	-	-	-	-
rRNA	0	-	-	-	-	-
retained_intron	4	0.85	1.09	0.21	0.2	0.39
sense_intronic	0	-	-	-	-	-
sense_overlapping	0	-	-	-	-	-
snRNA	23	0.7	0.92	0.13	0.18	0.34
snoRNA	10	0.79	1	0.2	0.29	0.52
start_codon	132	0.88	1.05	0.3	0.19	0.36
stop_codon	11	0.85	1.02	0.45	0.18	0.26
transcribed_processed_pseudogene	0	-	-	-	-	-
transcribed_unprocessed_pseudogene	2	0.91	0.78	0	0.2	0.47
unitary_pseudogene	0	-	-	-	-	-
unprocessed_pseudogene	3	0.81	1	0.33	0.41	0.63
Group Level	Total	T2C Fraction	Conv Spec	G Fraction	Red Seq Fraction	Red Copy Fraction
3'utr	438	0.81	0.67	0.26	0.19	0.3
3'utr-intron	1	0.4	0.3	0.4	0	0
3prime_overlapping_ncrna	0	-	-	-	-	-
5'utr	1899	0.81	0.72	0.33	0.19	0.32
5'utr-coding	0	-	-	-	-	-
5'utr-intron	86	0.82	0.72	0.46	0.16	0.27
IG_C_gene	0	-	-	-	-	-
IG_V_gene	0	-	-	-	-	-
IG_V_pseudogene	0	-	-	-	-	-
Mt_rRNA	0	-	-	-	-	-
Mt_tRNA	0	-	-	-	-	-
NoAnnotation	1067	0.39	0.29	0.4	0.42	0.6
TEC	0	-	-	-	-	-
TR_C_gene	20	0.82	0.78	0.46	0.14	0.24
TR_V_gene	0	-	-	-	-	-
antisense	38	0.43	0.35	0.37	0.35	0.49
coding	711	0.76	0.62	0.3	0.22	0.34
coding-intron	17	0.82	0.68	0.39	0.12	0.2
intron	286	0.49	0.37	0.35	0.42	0.55
intron-3'utr	4	0.74	0.51	0.07	0.1	0.14
intron-5'utr	21	0.82	0.73	0.41	0.12	0.21
intron-coding	9	0.84	0.67	0.13	0.03	0.05
known_ncrna	0	-	-	-	-	-
lincRNA_exon	29	0.66	0.44	0.35	0.27	0.37
lincRNA_exon-lincRNA_intron	10	0.86	0.75	0.25	0.09	0.16
lincRNA_intron	103	0.19	-0.02	0.49	0.39	0.65
lincRNA_intron-lincRNA_exon	1	0.82	0.95	0.73	0	0
miRNA	71	0.64	0.58	0.17	0.37	0.59
misc_RNA	5	0.81	0.7	0.09	0.32	0.46
non_stop_decay	0	-	-	-	-	-
nonsense_mediated_decay	24	0.66	0.47	0.2	0.26	0.42
polymorphic_pseudogene	0	-	-	-	-	-
processed_pseudogene	36	0.76	0.58	0.27	0.29	0.44
processed_transcript	92	0.72	0.64	0.4	0.31	0.45
pseudogene	0	-	-	-	-	-
rRNA	7	0.09	0.08	0.09	0.37	0.65
retained_intron	16	0.73	0.53	0.51	0.15	0.26
sense_intronic	1	1	0.7	1	0.67	0.8
sense_overlapping	3	0.82	0.39	0.47	0.19	0.32
snRNA	42	0.58	0.61	0.16	0.19	0.33
snoRNA	15	0.82	0.85	0.2	0.24	0.44
start_codon	286	0.84	0.82	0.3	0.17	0.3
stop_codon	30	0.77	0.69	0.32	0.1	0.16
transcribed_processed_pseudogene	1	0	0	0	1	1
transcribed_unprocessed_pseudogene	2	0.91	0.78	0	0.2	0.47
unitary_pseudogene	0	-	-	-	-	-
unprocessed_pseudogene	5	0.78	0.77	0.32	0.31	0.51

## Sheet: AP1_REP1
Summary Stats	AP1_REP1
Reads	3540827(100%)
Filtered Total	50670(1.43%)
Quality	25335(0.72%)
Length <20 nts	25335(0.72%)
3' Adapter	25335(0.72%)
5' Adapter	25335(0.72%)
19 nt Marker	25335(0.72%)
24 nt Marker	25335(0.72%)
Post-Processing	3490157(98.57%)
Uniquely Aligned Reads	146214(4.19%)
Clusters	408
Groups	1985
Reads Level	Total	T2C Fraction	Conv Spec	G Fraction	Red Seq Fraction	Red Copy Fraction
3'utr	8805	0.82	1.09	0.23	0.01	0.04
3'utr-intron	12	0.67	0.6	0.42	0	0
3prime_overlapping_ncrna	2	0.5	-0.3	0	0	0
5'utr	17261	0.75	0.97	0.33	0.05	0.13
5'utr-coding	1	1	0	0	0	0
5'utr-intron	357	0.82	1.12	0.42	0.05	0.11
IG_C_gene	10	0.7	0.37	0	0	0
IG_V_gene	1	0	0	1	0	0
Mt_rRNA	6	1	0.78	0.33	0	0
NoAnnotation	69781	0.17	-0.6	0.17	0.12	0.73
TEC	26	0.69	0.48	0.12	0.08	0.15
TR_C_gene	139	0.78	1.08	0.35	0.05	0.09
TR_V_pseudogene	1	1	0	0	0	0
antisense	2193	0.41	0.16	0.17	0.07	0.51
coding	14092	0.77	0.94	0.26	0.02	0.06
coding-intron	247	0.69	0.71	0.47	0.03	0.06
intron	19107	0.23	-0.47	0.17	0.07	0.58
intron-3'utr	20	0.7	0.85	0.5	0.11	0.2
intron-5'utr	88	0.69	0.83	0.31	0.06	0.15
intron-coding	166	0.65	0.53	0.22	0.02	0.05
known_ncrna	1	1	0	0	0	0
lincRNA_exon	1382	0.39	0.28	0.34	0.11	0.63
lincRNA_exon-lincRNA_intron	22	0.68	0.57	0.41	0	0
lincRNA_intron	4683	0.09	-0.83	0.26	0.19	0.77
lincRNA_intron-lincRNA_exon	6	0.83	0.4	0.17	0	0
miRNA	600	0.7	0.92	0.18	0.23	0.53
misc_RNA	19	0.74	0.85	0.42	0.06	0.11
nonsense_mediated_decay	338	0.65	0.58	0.31	0.06	0.15
polymorphic_pseudogene	1	0	0	0	0	0
processed_pseudogene	641	0.67	0.73	0.22	0.02	0.05
processed_transcript	3019	0.37	-0.15	0.22	0.06	0.57
pseudogene	2	1	0.3	1	0	0
rRNA	98	0.16	-0.6	0.1	0.25	0.72
retained_intron	244	0.69	0.62	0.34	0.04	0.07
sense_intronic	14	0.57	0.43	0.5	0	0
sense_overlapping	63	0.57	0.35	0.33	0.03	0.06
snRNA	271	0.59	0.93	0.36	0.11	0.28
snoRNA	287	0.8	1.16	0.21	0.17	0.59
start_codon	1577	0.79	1.09	0.29	0.04	0.12
stop_codon	231	0.82	1.07	0.19	0.01	0.03
transcribed_processed_pseudogene	8	0.62	0.1	0.12	0.17	0.38
transcribed_unprocessed_pseudogene	61	0.66	0.46	0.13	0.1	0.23
unitary_pseudogene	6	0.17	-0.7	0.33	0	0
unprocessed_pseudogene	325	0.29	-0.32	0.18	0.02	0.52
Cluster Level	Total	T2C Fraction	Conv Spec	G Fraction	Red Seq Fraction	Red Copy Fraction
3'utr	15	0.91	0.98	0.24	0.14	0.23
3'utr-intron	0	-	-	-	-	-
3prime_overlapping_ncrna	0	-	-	-	-	-
5'utr	185	0.85	0.91	0.34	0.14	0.26
5'utr-coding	0	-	-	-	-	-
5'utr-intron	3	0.87	1.22	0.47	0.14	0.31
IG_C_gene	0	-	-	-	-	-
IG_V_gene	0	-	-	-	-	-
Mt_rRNA	0	-	-	-	-	-
NoAnnotation	54	0.77	0.99	0.43	0.35	0.64
TEC	0	-	-	-	-	-
TR_C_gene	2	0.86	0.87	0.21	0.1	0.21
TR_V_pseudogene	0	-	-	-	-	-
antisense	4	0.74	1.09	0.21	0.34	0.71
coding	42	0.82	0.89	0.27	0.12	0.26
coding-intron	1	0.88	0.88	0	0.14	0.29
intron	10	0.8	0.88	0.33	0.21	0.38
intron-3'utr	0	-	-	-	-	-
intron-5'utr	3	0.89	0.86	0.36	0.17	0.24
intron-coding	0	-	-	-	-	-
known_ncrna	0	-	-	-	-	-
lincRNA_exon	2	0.72	0.87	0.71	0.32	0.52
lincRNA_exon-lincRNA_intron	0	-	-	-	-	-
lincRNA_intron	1	0.94	0.88	0	0.6	0.88
lincRNA_intron-lincRNA_exon	1	0.87	1.3	0.87	0.11	0.65
miRNA	20	0.76	0.87	0.24	0.39	0.64
misc_RNA	0	-	-	-	-	-
nonsense_mediated_decay	1	0.66	0.8	0.45	0.32	0.55
polymorphic_pseudogene	0	-	-	-	-	-
processed_pseudogene	1	0.5	0.7	0.5	0.11	0.2
processed_transcript	10	0.86	1.05	0.36	0.19	0.39
pseudogene	0	-	-	-	-	-
rRNA	0	-	-	-	-	-
retained_intron	1	0.86	0.78	0.86	0.17	0.29
sense_intronic	0	-	-	-	-	-
sense_overlapping	0	-	-	-	-	-
snRNA	9	0.69	0.99	0.33	0.16	0.29
snoRNA	7	0.77	0.98	0.35	0.32	0.59
start_codon	35	0.83	0.9	0.22	0.11	0.21
stop_codon	1	0.86	0.78	0	0	0
transcribed_processed_pseudogene	0	-	-	-	-	-
transcribed_unprocessed_pseudogene	0	-	-	-	-	-
unitary_pseudogene	0	-	-	-	-	-
unprocessed_pseudogene	0	-	-	-	-	-
Group Level	Total	T2C Fraction	Conv Spec	G Fraction	Red Seq Fraction	Red Copy Fraction
3'utr	52	0.76	0.65	0.28	0.16	0.23
3'utr-intron	0	-	-	-	-	-
3prime_overlapping_ncrna	0	-	-	-	-	-
5'utr	544	0.77	0.63	0.35	0.14	0.24
5'utr-coding	0	-	-	-	-	-
5'utr-intron	17	0.74	0.61	0.52	0.09	0.17
IG_C_gene	0	-	-	-	-	-
IG_V_gene	0	-	-	-	-	-
Mt_rRNA	0	-	-	-	-	-
NoAnnotation	735	0.2	0.06	0.28	0.5	0.72
TEC	0	-	-	-	-	-
TR_C_gene	3	0.73	0.59	0.28	0.1	0.2
TR_V_pseudogene	0	-	-	-	-	-
antisense	18	0.35	0.29	0.21	0.53	0.79
coding	139	0.68	0.52	0.29	0.19	0.28
coding-intron	5	0.72	0.56	0.4	0.38	0.48
intron	171	0.17	0.03	0.16	0.6	0.78
intron-3'utr	0	-	-	-	-	-
intron-5'utr	9	0.81	0.75	0.28	0.14	0.2
intron-coding	0	-	-	-	-	-
known_ncrna	0	-	-	-	-	-
lincRNA_exon	6	0.41	0.23	0.47	0.39	0.66
lincRNA_exon-lincRNA_intron	1	0.55	0.18	0.09	0	0
lincRNA_intron	85	0.11	-0.12	0.41	0.44	0.68
lincRNA_intron-lincRNA_exon	1	0.87	1.3	0.87	0.11	0.65
miRNA	35	0.69	0.6	0.19	0.39	0.61
misc_RNA	0	-	-	-	-	-
nonsense_mediated_decay	6	0.65	0.53	0.53	0.4	0.53
polymorphic_pseudogene	0	-	-	-	-	-
processed_pseudogene	1	0.5	0.7	0.5	0.11	0.2
processed_transcript	29	0.52	0.49	0.31	0.29	0.49
pseudogene	0	-	-	-	-	-
rRNA	3	0.17	0.2	0.14	0.5	0.78
retained_intron	5	0.62	0.5	0.34	0.03	0.06
sense_intronic	1	0.8	0.6	1	0	0
sense_overlapping	1	0.67	0.3	0	0	0
snRNA	14	0.59	0.67	0.4	0.12	0.22
snoRNA	10	0.78	0.85	0.24	0.29	0.52
start_codon	88	0.8	0.67	0.29	0.09	0.17
stop_codon	3	0.83	0.59	0.29	0.08	0.13
transcribed_processed_pseudogene	0	-	-	-	-	-
transcribed_unprocessed_pseudogene	1	0.62	0.15	0.06	0.5	0.75
unitary_pseudogene	0	-	-	-	-	-
unprocessed_pseudogene	2	0.33	0.15	0.33	0.5	0.5

## Sheet: AP1_REP2
Summary Stats	AP1_REP2
Reads	3389608(100%)
Filtered Total	69230(2.04%)
Quality	34615(1.02%)
Length <20 nts	34615(1.02%)
3' Adapter	34615(1.02%)
5' Adapter	34615(1.02%)
19 nt Marker	34615(1.02%)
24 nt Marker	34615(1.02%)
Post-Processing	3320378(97.96%)
Uniquely Aligned Reads	138162(4.16%)
Clusters	383
Groups	1906
Reads Level	Total	T2C Fraction	Conv Spec	G Fraction	Red Seq Fraction	Red Copy Fraction
3'utr	8352	0.83	1.15	0.22	0.01	0.03
3'utr-intron	10	0.7	0.54	0.3	0	0
3prime_overlapping_ncrna	3	0.33	-0.48	0	0	0
5'utr	16545	0.74	0.96	0.33	0.05	0.13
5'utr-coding	3	0.67	0.3	0	0	0
5'utr-intron	353	0.83	1.07	0.48	0.05	0.11
IG_C_gene	9	0.56	0.1	0.22	0	0
Mt_rRNA	8	0.75	0.48	0.38	0	0
Mt_tRNA	1	1	0	1	0	0
NoAnnotation	66072	0.17	-0.59	0.17	0.12	0.73
TEC	38	0.71	0.48	0.24	0.06	0.11
TR_C_gene	87	0.74	0.81	0.43	0.09	0.17
TR_V_gene	62	0.77	1.2	0.48	0.05	0.11
antisense	1280	0.44	0.03	0.27	0.05	0.27
coding	13272	0.78	0.96	0.27	0.03	0.07
coding-intron	197	0.75	0.77	0.41	0.02	0.06
intron	18735	0.22	-0.51	0.15	0.07	0.59
intron-3'utr	20	0.75	0.88	0.3	0.11	0.2
intron-5'utr	77	0.73	1.05	0.39	0.06	0.14
intron-coding	203	0.68	0.6	0.22	0.01	0.02
known_ncrna	2	1	0.3	0	0	0
lincRNA_exon	1991	0.36	0.39	0.55	0.11	0.76
lincRNA_exon-lincRNA_intron	28	0.89	1.4	0.57	0.05	0.36
lincRNA_intron	4187	0.09	-0.83	0.31	0.18	0.76
lincRNA_intron-lincRNA_exon	11	0.82	0.48	0.36	0	0
miRNA	598	0.68	0.82	0.16	0.24	0.53
misc_RNA	17	0.53	0.48	0.35	0.07	0.18
non_stop_decay	1	0	0	0	0	0
nonsense_mediated_decay	299	0.61	0.47	0.31	0.06	0.15
polymorphic_pseudogene	2	0	0	0	0	0
processed_pseudogene	628	0.67	0.69	0.26	0.02	0.05
processed_transcript	2057	0.49	0.13	0.31	0.06	0.38
rRNA	82	0.18	-0.49	0.13	0.1	0.57
retained_intron	218	0.75	0.81	0.28	0.02	0.04
sense_intronic	8	0.75	0.48	0.38	0	0
sense_overlapping	51	0.65	0.52	0.22	0.02	0.04
snRNA	295	0.65	0.98	0.35	0.13	0.39
snoRNA	258	0.78	1.15	0.21	0.17	0.59
start_codon	1520	0.81	1.09	0.3	0.04	0.1
stop_codon	229	0.81	1.04	0.27	0.01	0.03
transcribed_processed_pseudogene	4	0.5	-0.18	0.25	0	0
transcribed_unprocessed_pseudogene	60	0.63	0.54	0.15	0.02	0.05
unitary_pseudogene	16	0.25	-0.44	0.12	0.08	0.25
unprocessed_pseudogene	273	0.32	-0.26	0.16	0.02	0.5
Cluster Level	Total	T2C Fraction	Conv Spec	G Fraction	Red Seq Fraction	Red Copy Fraction
3'utr	12	0.87	0.91	0.19	0.12	0.21
3'utr-intron	0	-	-	-	-	-
3prime_overlapping_ncrna	0	-	-	-	-	-
5'utr	192	0.83	0.89	0.36	0.17	0.3
5'utr-coding	0	-	-	-	-	-
5'utr-intron	6	0.81	0.84	0.45	0.08	0.16
IG_C_gene	0	-	-	-	-	-
Mt_rRNA	0	-	-	-	-	-
Mt_tRNA	0	-	-	-	-	-
NoAnnotation	51	0.78	1	0.44	0.35	0.66
TEC	0	-	-	-	-	-
TR_C_gene	2	0.69	0.88	0.5	0.14	0.24
TR_V_gene	0	-	-	-	-	-
antisense	1	0.95	0.98	0.85	0.4	0.85
coding	43	0.83	0.92	0.27	0.15	0.31
coding-intron	3	0.87	0.72	0.38	0.21	0.34
intron	4	0.88	0.85	0.63	0.1	0.25
intron-3'utr	0	-	-	-	-	-
intron-5'utr	1	1	0.85	0	0.5	0.71
intron-coding	0	-	-	-	-	-
known_ncrna	0	-	-	-	-	-
lincRNA_exon	1	0.96	1.33	0.99	0.5	0.96
lincRNA_exon-lincRNA_intron	0	-	-	-	-	-
lincRNA_intron	2	0.78	0.77	0.56	0.27	0.49
lincRNA_intron-lincRNA_exon	1	0.73	0.74	0.87	0.18	0.7
miRNA	16	0.81	0.88	0.17	0.4	0.6
misc_RNA	0	-	-	-	-	-
non_stop_decay	0	-	-	-	-	-
nonsense_mediated_decay	1	1	0.95	0	0.33	0.56
polymorphic_pseudogene	0	-	-	-	-	-
processed_pseudogene	1	0.92	1.04	0.67	0.38	0.58
processed_transcript	6	0.78	1.03	0.54	0.17	0.35
rRNA	0	-	-	-	-	-
retained_intron	1	1	0.9	0.38	0.17	0.38
sense_intronic	0	-	-	-	-	-
sense_overlapping	0	-	-	-	-	-
snRNA	5	0.68	1.09	0.5	0.2	0.49
snoRNA	5	0.82	1.16	0.17	0.32	0.64
start_codon	29	0.81	0.89	0.25	0.14	0.27
stop_codon	0	-	-	-	-	-
transcribed_processed_pseudogene	0	-	-	-	-	-
transcribed_unprocessed_pseudogene	0	-	-	-	-	-
unitary_pseudogene	0	-	-	-	-	-
unprocessed_pseudogene	0	-	-	-	-	-
Group Level	Total	T2C Fraction	Conv Spec	G Fraction	Red Seq Fraction	Red Copy Fraction
3'utr	42	0.75	0.61	0.28	0.17	0.25
3'utr-intron	0	-	-	-	-	-
3prime_overlapping_ncrna	0	-	-	-	-	-
5'utr	537	0.76	0.62	0.34	0.14	0.23
5'utr-coding	0	-	-	-	-	-
5'utr-intron	19	0.8	0.63	0.55	0.08	0.14
IG_C_gene	0	-	-	-	-	-
Mt_rRNA	0	-	-	-	-	-
Mt_tRNA	0	-	-	-	-	-
NoAnnotation	695	0.2	0.08	0.28	0.52	0.73
TEC	1	1	0.7	0.2	0.67	0.8
TR_C_gene	5	0.73	0.57	0.5	0.19	0.26
TR_V_gene	0	-	-	-	-	-
antisense	21	0.36	0.21	0.23	0.53	0.69
coding	127	0.72	0.59	0.29	0.19	0.32
coding-intron	5	0.78	0.57	0.6	0.27	0.43
intron	163	0.15	-0.07	0.13	0.62	0.8
intron-3'utr	0	-	-	-	-	-
intron-5'utr	7	0.79	0.54	0.38	0.07	0.1
intron-coding	1	0.5	0.18	0.33	0	0
known_ncrna	0	-	-	-	-	-
lincRNA_exon	6	0.47	0.31	0.47	0.33	0.6
lincRNA_exon-lincRNA_intron	2	0.83	0.8	0.58	0.5	0.5
lincRNA_intron	87	0.08	-0.07	0.45	0.45	0.66
lincRNA_intron-lincRNA_exon	1	0.73	0.74	0.87	0.18	0.7
miRNA	32	0.71	0.63	0.2	0.35	0.55
misc_RNA	0	-	-	-	-	-
non_stop_decay	0	-	-	-	-	-
nonsense_mediated_decay	7	0.48	0.42	0.37	0.29	0.45
polymorphic_pseudogene	0	-	-	-	-	-
processed_pseudogene	6	0.65	0.49	0.46	0.19	0.32
processed_transcript	29	0.5	0.44	0.38	0.28	0.44
rRNA	2	0.09	0.15	0.01	0.38	0.72
retained_intron	3	0.83	0.59	0.31	0.06	0.12
sense_intronic	0	-	-	-	-	-
sense_overlapping	0	-	-	-	-	-
snRNA	12	0.7	0.76	0.41	0.18	0.33
snoRNA	10	0.65	0.7	0.22	0.25	0.45
start_codon	80	0.8	0.69	0.3	0.1	0.19
stop_codon	3	0.87	0.58	0.2	0	0
transcribed_processed_pseudogene	0	-	-	-	-	-
transcribed_unprocessed_pseudogene	1	0.78	0.54	0	0.14	0.33
unitary_pseudogene	1	0	0	0	0.5	0.8
unprocessed_pseudogene	1	0	0	0	0.5	0.99

## Sheet: AP2_REP1
Summary Stats	AP2_REP1
Reads	5863482(100%)
Filtered Total	66902(1.14%)
Quality	33451(0.57%)
Length <20 nts	33451(0.57%)
3' Adapter	33451(0.57%)
5' Adapter	33451(0.57%)
19 nt Marker	33451(0.57%)
24 nt Marker	33451(0.57%)
Post-Processing	5796580(98.86%)
Uniquely Aligned Reads	133837(2.31%)
Clusters	414
Groups	1890
Reads Level	Total	T2C Fraction	Conv Spec	G Fraction	Red Seq Fraction	Red Copy Fraction
3'utr	12607	0.84	1.27	0.24	0.02	0.04
3'utr-intron	15	0.73	0.74	0.2	0	0
3prime_overlapping_ncrna	1	1	0	0	0	0
5'utr	14618	0.76	1.02	0.33	0.05	0.11
5'utr-coding	4	0.5	0	0.5	0	0
5'utr-intron	321	0.83	1.1	0.44	0.07	0.15
IG_C_gene	14	0.64	0.18	0	0	0
IG_V_gene	1	0	0	1	0	0
Mt_rRNA	18	0.78	0.85	0.33	0.06	0.11
Mt_tRNA	5	0.8	0.6	0	0	0
NoAnnotation	54721	0.19	-0.44	0.24	0.1	0.62
TEC	34	0.71	0.6	0.35	0	0
TR_C_gene	143	0.78	0.97	0.4	0.04	0.08
antisense	1275	0.5	0.16	0.29	0.04	0.13
coding	19505	0.79	1.05	0.27	0.03	0.07
coding-intron	281	0.75	0.71	0.52	0.03	0.06
intron	15459	0.35	-0.2	0.2	0.04	0.39
intron-3'utr	19	0.89	0.93	0.21	0.06	0.11
intron-5'utr	76	0.86	1.34	0.26	0.01	0.03
intron-coding	294	0.75	0.81	0.21	0.01	0.02
lincRNA_exon	666	0.66	0.76	0.34	0.02	0.11
lincRNA_exon-lincRNA_intron	11	1	1.04	0.55	0	0
lincRNA_intron	6236	0.1	-0.66	0.43	0.2	0.79
lincRNA_intron-lincRNA_exon	12	0.92	0.74	0.17	0	0
miRNA	881	0.63	0.76	0.19	0.26	0.59
misc_RNA	32	0.66	0.62	0.22	0.07	0.16
non_stop_decay	1	0	0	0	0	0
nonsense_mediated_decay	450	0.5	0.2	0.24	0.05	0.26
processed_pseudogene	1020	0.71	0.8	0.27	0.02	0.05
processed_transcript	1927	0.6	0.39	0.31	0.05	0.27
protein_coding	1	0	0	1	0	0
pseudogene	1	1	0	1	0	0
rRNA	77	0.25	0.1	0.1	0.29	0.53
retained_intron	268	0.72	0.71	0.34	0.02	0.04
sense_intronic	12	0.58	0.07	0.33	0.09	0.17
sense_overlapping	59	0.56	0.24	0.27	0.02	0.08
snRNA	325	0.62	0.96	0.28	0.12	0.27
snoRNA	461	0.79	1.33	0.21	0.23	0.56
start_codon	1197	0.81	1.11	0.3	0.03	0.07
stop_codon	429	0.84	1.28	0.24	0.01	0.03
transcribed_processed_pseudogene	13	0.54	0.24	0.46	0	0
transcribed_unprocessed_pseudogene	94	0.76	0.6	0.1	0.08	0.19
unitary_pseudogene	4	0	0	0.25	0	0
unprocessed_pseudogene	249	0.45	0.04	0.23	0.03	0.28
Cluster Level	Total	T2C Fraction	Conv Spec	G Fraction	Red Seq Fraction	Red Copy Fraction
3'utr	37	0.88	0.91	0.23	0.12	0.22
3'utr-intron	0	-	-	-	-	-
3prime_overlapping_ncrna	0	-	-	-	-	-
5'utr	151	0.83	0.9	0.4	0.16	0.28
5'utr-coding	0	-	-	-	-	-
5'utr-intron	8	0.82	0.93	0.42	0.13	0.23
IG_C_gene	0	-	-	-	-	-
IG_V_gene	0	-	-	-	-	-
Mt_rRNA	0	-	-	-	-	-
Mt_tRNA	0	-	-	-	-	-
NoAnnotation	52	0.73	0.94	0.37	0.33	0.59
TEC	0	-	-	-	-	-
TR_C_gene	0	-	-	-	-	-
antisense	0	-	-	-	-	-
coding	65	0.82	0.92	0.29	0.2	0.34
coding-intron	2	0.78	0.81	0.04	0.21	0.35
intron	11	0.86	0.82	0.48	0.31	0.46
intron-3'utr	0	-	-	-	-	-
intron-5'utr	2	0.93	0.84	0	0	0
intron-coding	1	0.64	0.95	0	0.17	0.29
lincRNA_exon	1	0.89	0.9	0	0.29	0.44
lincRNA_exon-lincRNA_intron	0	-	-	-	-	-
lincRNA_intron	4	0.73	1.04	0.33	0.29	0.64
lincRNA_intron-lincRNA_exon	1	0.67	0.78	0.78	0	0
miRNA	21	0.77	0.88	0.19	0.43	0.68
misc_RNA	0	-	-	-	-	-
non_stop_decay	0	-	-	-	-	-
nonsense_mediated_decay	2	0.79	0.69	0.23	0.12	0.29
processed_pseudogene	0	-	-	-	-	-
processed_transcript	5	0.87	1.05	0.26	0.24	0.51
protein_coding	0	-	-	-	-	-
pseudogene	0	-	-	-	-	-
rRNA	1	0.29	0.6	0	0.44	0.64
retained_intron	0	-	-	-	-	-
sense_intronic	0	-	-	-	-	-
sense_overlapping	0	-	-	-	-	-
snRNA	9	0.68	0.85	0.32	0.27	0.43
snoRNA	13	0.82	0.91	0.19	0.4	0.65
start_codon	24	0.84	0.89	0.3	0.11	0.22
stop_codon	4	0.96	0.93	0.39	0.1	0.19
transcribed_processed_pseudogene	0	-	-	-	-	-
transcribed_unprocessed_pseudogene	0	-	-	-	-	-
unitary_pseudogene	0	-	-	-	-	-
unprocessed_pseudogene	0	-	-	-	-	-
Group Level	Total	T2C Fraction	Conv Spec	G Fraction	Red Seq Fraction	Red Copy Fraction
3'utr	112	0.82	0.7	0.33	0.13	0.22
3'utr-intron	0	-	-	-	-	-
3prime_overlapping_ncrna	0	-	-	-	-	-
5'utr	423	0.78	0.65	0.37	0.15	0.24
5'utr-coding	0	-	-	-	-	-
5'utr-intron	22	0.82	0.69	0.33	0.13	0.22
IG_C_gene	0	-	-	-	-	-
IG_V_gene	0	-	-	-	-	-
Mt_rRNA	1	0.8	0.6	0	0.25	0.4
Mt_tRNA	0	-	-	-	-	-
NoAnnotation	642	0.21	0.07	0.32	0.52	0.75
TEC	0	-	-	-	-	-
TR_C_gene	8	0.7	0.45	0.49	0.01	0.02
antisense	15	0.35	0.2	0.31	0.59	0.65
coding	217	0.75	0.63	0.32	0.18	0.29
coding-intron	3	0.78	0.72	0.33	0.28	0.46
intron	126	0.21	0.13	0.21	0.63	0.79
intron-3'utr	0	-	-	-	-	-
intron-5'utr	6	0.97	0.74	0.26	0.12	0.19
intron-coding	4	0.77	0.65	0.09	0.1	0.17
lincRNA_exon	2	0.49	0.54	0.43	0.37	0.67
lincRNA_exon-lincRNA_intron	0	-	-	-	-	-
lincRNA_intron	97	0.13	-0.04	0.5	0.47	0.76
lincRNA_intron-lincRNA_exon	1	0.67	0.78	0.78	0	0
miRNA	48	0.67	0.59	0.22	0.38	0.61
misc_RNA	0	-	-	-	-	-
non_stop_decay	0	-	-	-	-	-
nonsense_mediated_decay	5	0.37	0.28	0.29	0.26	0.5
processed_pseudogene	8	0.49	0.32	0.46	0.11	0.19
processed_transcript	27	0.59	0.52	0.39	0.3	0.48
protein_coding	0	-	-	-	-	-
pseudogene	0	-	-	-	-	-
rRNA	4	0.28	0.33	0.01	0.47	0.69
retained_intron	2	0.77	0.57	0.62	0.07	0.12
sense_intronic	0	-	-	-	-	-
sense_overlapping	1	0	0	1	1	1
snRNA	17	0.63	0.63	0.22	0.2	0.29
snoRNA	22	0.82	0.81	0.22	0.33	0.55
start_codon	63	0.79	0.68	0.33	0.07	0.14
stop_codon	11	0.86	0.73	0.25	0.14	0.25
transcribed_processed_pseudogene	0	-	-	-	-	-
transcribed_unprocessed_pseudogene	1	0.62	0.15	0.06	0.44	0.69
unitary_pseudogene	0	-	-	-	-	-
unprocessed_pseudogene	2	0	0	0	0.75	0.99

[truncated: 11 more sheets: AP2_REP2, NPA_REP1, NPA_REP2, NPB_REP1, NPB_REP2, NPD_REP1, NPD_REP2, NP1_REP1, NP1_REP2, NP2_REP1, NP2_REP2]
