# Supplementary material for: A burst in T cell receptor translation mediated by eIF3 interactions with T cell receptor mRNAs
Source: bioRxiv preprint, doi:10.1101/2019.12.20.885558, version 3 (2020-10-21)
Supplement: Supplementary Table 3 [file 885558_file04.xlsx]

## Sheet: Samples
PAR-CLIP Samples	Name of Tab
EIF3A/C/B, Activated, Replicate 1	APA_REP1
EIF3A/C/B, Activated, Replicate 2	APA_REP2
EIF3B/C, Activated, Replicate 1	APB_REP1
EIF3B/C, Activated, Replicate 2	APB_REP2
EIF3D/L, Activated, Replicate 1	APD_REP1
EIF3D/L, Activated, Replicate 2	APD_REP2
EIF3F/E, Activated, Replicate 1	AP1_REP1
EIF3F/E, Activated, Replicate 2	AP1_REP2
EIF3G/E/F, Activated, Replicate 1	AP2_REP1
EIF3G/E/F, Activated, Replicate 2	AP2_REP2
EIF3A/C/B, Not activated, Replicate 1	NPA_REP1
EIF3A/C/B, Not activated, Replicate 2	NPA_REP2
EIF3B/C, Not activated, Replicate 1	NPB_REP1
EIF3B/C, Not activated, Replicate 2	NPB_REP2
EIF3D/L, Not activated, Replicate 1	NPD_REP1
EIF3D/L, Not activated, Replicate 2	NPD_REP2
EIF3F/E, Not activated, Replicate 1	NP1_REP1
EIF3F/E, Not activated, Replicate 2	NP1_REP2
EIF3G/E/F, Not activated, Replicate 1	NP2_REP1
EIF3G/E/F, Not activated, Replicate 2	NP2_REP2

## Sheet: APA_REP1
GeneName	Sites	ReadCountSum	ReadCountMed	T2CFractionSum	T2CFractionMed	ConversionSpecificitySum	ConversionSpecificityMed	UniqueReadsSum	UniqueReadsMed	5'utr	Intron	Exon	3'utr	Start_codon	Stop_codon	Junction	GeneType
A1BG	2	18	9	2	1	1.90849	0.95	17	8.5	0	0	1	1	0	0	0	3'utr
A2MP1	3	390	15	2.67306	0.93	2.8293	1	76	12	0	0	0	0	0	0	0	transcribed_unprocessed_pseudogene
AAAS	1	9	9	1	1	0.954243	0.95	9	9	0	0	0	0	1	0	0	start_codon
AAK1	1	7	7	0.857143	0.86	0.778151	0.78	7	7	1	0	0	0	0	0	0	5'utr
AARS	2	16	8	1.74603	0.87	1.68124	0.84	16	8	2	0	0	0	0	0	0	5'utr
AASDHPPT	1	10	10	1	1	1	1	8	8	0	0	1	0	0	0	0	coding
AATF	1	110	110	0.927273	0.93	1.53148	1.53	49	49	0	0	0	0	1	0	0	start_codon
ABCF2	1	7	7	0.714286	0.71	0.69897	0.7	6	6	0	1	0	0	0	0	0	intron
ABHD10	1	8	8	1	1	0.90309	0.9	5	5	0	0	1	0	0	0	0	coding
ABHD12	2	37	18	1.73235	0.87	2.10551	1.05	34	17	0	0	1	0	1	0	0	coding
ABHD13	1	47	47	0.893617	0.89	1.14613	1.15	41	41	1	0	0	0	0	0	0	5'utr
ABHD15	2	18	9	1.72727	0.86	1.44716	0.72	17	8.5	0	0	2	0	0	0	0	coding
ABHD17A	3	58	14	2.69498	0.86	3.41564	1.15	38	6	2	0	1	0	0	0	0	coding
ABHD17AP3	1	11	11	0.909091	0.91	1	1	10	10	0	0	0	0	0	0	0	unprocessed_pseudogene
ABHD17AP6	3	90	25	2.54686	0.83	3.98588	1.3	44	12	0	0	0	0	0	0	0	unprocessed_pseudogene
ABHD17B	5	148	30	4.25387	0.84	5.12685	1.08	96	20	5	0	0	0	0	0	0	5'utr
ABHD17C	1	31	31	0.258065	0.26	0.60206	0.6	5	5	0	0	1	0	0	0	0	coding
ABHD5	1	30	30	0.6	0.6	0.954243	0.95	29	29	0	0	0	0	1	0	0	start_codon
ABHD6	1	8	8	1	1	0.90309	0.9	7	7	1	0	0	0	0	0	0	5'utr
ABI1	1	12	12	0.833333	0.83	0.69897	0.7	10	10	1	0	0	0	0	0	0	5'utr
ABI2	1	41	41	0.902439	0.9	1.5682	1.57	35	35	0	0	0	0	1	0	0	start_codon
ABL1	6	100	14	4.96647	0.85	5.68168	0.95	88	12	2	0	1	3	0	0	0	5'utr
ABRACL	1	78	78	0.923077	0.92	1.38021	1.38	37	37	1	0	0	0	0	0	0	5'utr
AC004386.4	1	10	10	1	1	1	1	3	3	0	0	0	0	0	0	0	processed_pseudogene
AC004980.7	1	27	27	0.888889	0.89	1.07918	1.08	18	18	0	0	0	0	0	0	0	processed_transcript
AC005019.2	1	7	7	0.714286	0.71	0.69897	0.7	7	7	0	0	0	0	0	0	0	processed_pseudogene
AC005262.3	1	10	10	0.9	0.9	0.653213	0.65	8	8	0	0	0	0	0	0	0	antisense
AC005562.1	1	8	8	0.875	0.88	0.845098	0.85	7	7	0	0	0	0	0	0	0	processed_transcript
AC005822.1	1	28	28	0.5	0.5	0.669007	0.67	21	21	0	0	0	0	0	0	0	processed_pseudogene
AC006538.1	1	10	10	0.9	0.9	0.954243	0.95	8	8	0	0	0	0	0	0	0	sense_intronic
AC007318.5	1	8	8	0.875	0.88	0.845098	0.85	7	7	0	0	0	0	0	0	0	processed_pseudogene
AC007773.2	1	20	20	1	1	1.30103	1.3	10	10	0	0	0	0	0	0	0	antisense
AC007969.5	1	15	15	0.8	0.8	1.07918	1.08	13	13	0	0	0	0	0	0	0	processed_pseudogene
AC008155.1	1	13	13	1	1	1.11394	1.11	5	5	0	0	0	0	0	0	0	processed_pseudogene
AC011893.3	2	22	11	1.36667	0.68	1.44716	0.72	22	11	0	0	0	0	0	0	0	antisense
AC012146.7	2	24	12	1.82857	0.91	1.46613	0.73	17	8.5	0	0	0	0	0	0	0	antisense
AC013394.2	3	66	17	2.57963	0.82	2.58634	0.9	56	13	0	0	0	0	0	0	0	lincRNA_exon
AC018890.6	2	40	20	1.30667	0.65	1.42597	0.71	32	16	0	0	0	0	0	0	0	antisense
AC024560.3	1	7	7	0.714286	0.71	0.69897	0.7	7	7	0	0	0	0	0	0	0	processed_transcript
AC024592.12	1	25	25	0.84	0.84	1.32222	1.32	21	21	0	0	0	0	1	0	0	start_codon
AC024937.4	1	11	11	0.818182	0.82	0.954243	0.95	6	6	0	0	0	0	0	0	0	processed_pseudogene
AC073046.25	4	33	8	3.62103	0.88	3.48058	0.87	28	7	0	0	0	0	0	0	0	lincRNA_exon
AC073283.4	1	23	23	0.913043	0.91	1.32222	1.32	13	13	0	0	0	0	0	0	0	lincRNA_intron
AC073957.15	1	47	47	0.787234	0.79	0.869232	0.87	38	38	0	0	0	0	0	0	0	antisense
AC074183.4	1	13	13	0.923077	0.92	1.07918	1.08	11	11	0	0	0	0	0	0	0	lincRNA_exon
AC090587.4	3	66	20	2.64603	0.89	3.23754	0.95	53	18	0	0	0	0	0	0	0	sense_overlapping
AC091729.9	1	20	20	0.9	0.9	1.25527	1.26	12	12	0	0	0	0	0	0	0	antisense
AC093106.7	1	9	9	0.777778	0.78	0.845098	0.85	7	7	0	0	0	0	0	0	0	processed_pseudogene
AC093323.3	2	25	12	1.54167	0.77	1.92428	0.96	25	12.5	0	0	0	0	0	0	0	lincRNA_exon
AC093642.5	1	11	11	0.818182	0.82	0.653213	0.65	8	8	0	0	0	0	0	0	0	processed_transcript
AC096574.4	1	8	8	1	1	0.90309	0.9	4	4	0	0	0	0	0	0	0	antisense
AC097523.3	1	8	8	0.75	0.75	0.778151	0.78	8	8	0	0	0	0	0	0	0	processed_pseudogene
AC113189.5	4	57	13	3.76389	0.94	4.27453	1.05	46	9.5	0	0	0	0	0	0	0	antisense
AC135048.13	1	12	12	0.666667	0.67	0.90309	0.9	11	11	0	0	0	0	0	0	0	processed_transcript
AC142528.1	1	7	7	0.857143	0.86	0.778151	0.78	6	6	0	0	0	0	0	0	0	antisense
ACAA2	1	7	7	1	1	0.845098	0.85	5	5	1	0	0	0	0	0	0	5'utr
ACADVL	1	24	24	0.791667	0.79	0.977724	0.98	18	18	0	0	1	0	0	0	0	coding
ACAP3	1	10	10	0.9	0.9	0.954243	0.95	10	10	0	0	1	0	0	0	0	coding
ACEA_U3	7	1000	139	5.35603	0.73	9.0239	1.31	542	68	0	0	0	0	0	0	0	snoRNA
ACLY	1	20	20	0.95	0.95	1.27875	1.28	17	17	1	0	0	0	0	0	0	5'utr
ACOT7	1	13	13	1	1	1.11394	1.11	12	12	1	0	0	0	0	0	0	5'utr
ACOX1	4	55	9	3.26207	0.87	3.59522	0.77	33	7.5	3	0	0	0	1	0	0	start_codon
ACP1	1	12	12	0.916667	0.92	1.04139	1.04	10	10	0	0	0	0	1	0	0	start_codon
ACP6	1	7	7	1	1	0.845098	0.85	7	7	1	0	0	0	0	0	0	5'utr
ACSF3	8	104	12	7.00588	0.88	7.53038	0.94	91	9.5	0	4	1	2	0	1	0	intron
ACSL3	1	15	15	0.933333	0.93	1.14613	1.15	12	12	1	0	0	0	0	0	0	5'utr
ACSL4	1	9	9	0.888889	0.89	0.90309	0.9	8	8	1	0	0	0	0	0	0	5'utr
ACTB	12	533	11	11.0699	0.91	13.4058	1.04	313	10.5	0	0	9	1	1	0	0	3'utr
ACTBP11	1	7	7	1	1	0.845098	0.85	5	5	0	0	0	0	0	0	0	processed_pseudogene
ACTBP2	1	10	10	0.7	0.7	0.845098	0.85	9	9	0	0	0	0	0	0	0	processed_pseudogene
ACTG1	8	299	12	6.38288	0.83	7.26785	0.95	145	10.5	1	0	3	2	0	0	0	3'utr
ACTL6A	1	24	24	0.791667	0.79	1.27875	1.28	24	24	0	0	0	0	0	0	0	5'utr-intron
ACTN4	2	62	31	1.64884	0.82	2.27416	1.14	53	26.5	0	0	1	0	1	0	0	start_codon
ACTR10	1	8	8	0.75	0.75	0.778151	0.78	6	6	0	0	1	0	0	0	0	coding
ACTR2	1	46	46	0.782609	0.78	1.5563	1.56	38	38	0	0	0	0	1	0	0	start_codon
ACTR3	4	100	16	3.42532	0.85	3.74576	1	81	14.5	3	0	0	0	1	0	0	5'utr
ACTR3B	1	8	8	1	1	0.90309	0.9	3	3	1	0	0	0	0	0	0	5'utr
ACTR6	1	7	7	1	1	0.845098	0.85	6	6	0	0	0	0	1	0	0	start_codon
ACVR2B	1	15	15	0.866667	0.87	1.11394	1.11	15	15	1	0	0	0	0	0	0	5'utr
ADAM10	1	8	8	0.875	0.88	0.845098	0.85	8	8	0	0	0	0	0	0	0	coding-intron
ADAM17	1	8	8	0.75	0.75	0.778151	0.78	8	8	1	0	0	0	0	0	0	5'utr
ADAR	13	416	19	11.3128	0.89	13.0707	1.04	283	17	2	0	7	2	1	0	0	3'utr
ADARB1	4	91	23	3.25057	0.8	3.26267	0.86	58	16.5	1	0	1	1	0	0	0	5'utr
ADAT1	1	8	8	0.875	0.88	0.845098	0.85	8	8	0	1	0	0	0	0	0	intron
ADAT3	2	15	7	2	1	1.74819	0.87	12	6	0	0	2	0	0	0	0	coding
ADCK2	2	23	11	1.49231	0.75	1.5563	0.78	17	8.5	0	0	1	0	1	0	0	start_codon
ADCY7	2	20	10	1.875	0.94	1.92428	0.96	13	6.5	0	0	0	0	0	1	0	5'utr-intron
ADD1	1	7	7	1	1	0.845098	0.85	7	7	1	0	0	0	0	0	0	5'utr
ADIPOR1	1	23	23	0.869565	0.87	1.30103	1.3	12	12	1	0	0	0	0	0	0	5'utr
ADM2	1	9	9	1	1	0.954243	0.95	6	6	1	0	0	0	0	0	0	5'utr
ADNP	5	120	18	4.34195	0.83	4.70021	0.81	89	15	4	0	0	1	0	0	0	3'utr
ADNP2	1	27	27	0.777778	0.78	1.02119	1.02	22	22	1	0	0	0	0	0	0	5'utr
ADO	2	139	69	1.90909	0.95	2.32222	1.16	92	46	1	0	0	1	0	0	0	5'utr
ADORA2B	3	50	10	2.29375	0.75	2.75358	0.85	40	7	1	0	2	0	0	0	0	5'utr
ADPGK	2	40	20	1.84375	0.92	1.73239	0.87	36	18	0	0	2	0	0	0	0	coding
ADPRHL2	3	31	9	2.92308	1	2.98767	0.95	28	9	0	0	1	1	0	0	0	coding
ADRBK1	3	45	15	2.70352	0.91	2.94547	1.02	27	10	1	0	0	1	1	0	0	5'utr
ADRBK2	3	46	13	2.64	1	2.74403	0.9	40	11	1	0	0	2	0	0	0	5'utr
ADRM1	4	42	10	3.38095	0.88	3.42037	0.88	37	8	1	0	2	0	0	0	0	5'utr
ADSL	1	9	9	1	1	0.954243	0.95	9	9	0	0	0	0	1	0	0	start_codon
ADSS	1	11	11	0.818182	0.82	0.653213	0.65	10	10	1	0	0	0	0	0	0	5'utr
AEN	2	18	9	1.65	0.83	1.73239	0.87	15	7.5	0	1	1	0	0	0	0	intron
AES	7	153	20	5.50643	0.8	6.18566	0.9	118	13	2	0	1	3	1	0	0	3'utr
AFF2	1	28	28	0.75	0.75	0.720159	0.72	23	23	1	0	0	0	0	0	0	5'utr
AFF4	1	7	7	0.857143	0.86	0.778151	0.78	7	7	1	0	0	0	0	0	0	5'utr
AFG3L1P	1	7	7	1	1	0.845098	0.85	7	7	0	0	0	0	0	0	0	processed_transcript
AFG3L2	2	19	9	1.77381	0.89	1.81954	0.91	16	8	1	0	0	0	1	0	0	start_codon
AFTPH	2	33	16	1.54545	0.77	2.12057	1.06	31	15.5	2	0	0	0	0	0	0	5'utr
AGAP1	1	8	8	0.75	0.75	0.778151	0.78	8	8	0	1	0	0	0	0	0	intron
AGAP2	2	18	9	1.775	0.89	1.79934	0.9	17	8.5	0	0	0	2	0	0	0	3'utr
AGAP3	1	7	7	1	1	0.845098	0.85	6	6	0	0	0	0	0	0	0	processed_transcript
AGFG1	2	53	26	1.78772	0.89	2.05595	1.03	37	18.5	1	0	0	0	1	0	0	5'utr
AGGF1	3	36	14	2.71429	0.86	2.73239	0.78	35	13	3	0	0	0	0	0	0	5'utr
AGO1	1	7	7	1	1	0.845098	0.85	7	7	0	0	0	0	1	0	0	start_codon
AGO2	1	48	48	0.770833	0.77	0.869232	0.87	41	41	1	0	0	0	0	0	0	5'utr
AGPAT5	1	9	9	0.888889	0.89	0.90309	0.9	9	9	0	0	1	0	0	0	0	coding
AGPAT6	3	47	15	2.45	0.85	2.96284	0.95	42	15	2	0	0	1	0	0	0	5'utr
AGPS	1	9	9	0.888889	0.89	0.60206	0.6	8	8	0	0	1	0	0	0	0	coding
AHCYL1	1	32	32	0.8125	0.81	1.11394	1.11	16	16	1	0	0	0	0	0	0	5'utr
AHDC1	13	177	11	10.9307	0.88	11.4451	0.9	139	10	1	0	12	0	0	0	0	coding
AHI1	1	22	22	0.818182	0.82	1.25527	1.26	14	14	1	0	0	0	0	0	0	5'utr
AHSA1	2	68	34	1.66996	0.83	2.24304	1.12	55	27.5	1	0	1	0	0	0	0	5'utr
AHSA2	1	8	8	1	1	0.90309	0.9	8	8	1	0	0	0	0	0	0	5'utr
AIF1	2	31	15	1.59211	0.8	2.15836	1.08	31	15.5	1	0	0	0	1	0	0	5'utr
AIMP2	1	10	10	0.6	0.6	0.778151	0.78	6	6	1	0	0	0	0	0	0	5'utr
AIP	2	51	25	1.73214	0.87	2.62325	1.31	39	19.5	1	0	0	0	1	0	0	5'utr
AJ003147.9	1	249	249	0.903614	0.9	1.20605	1.21	44	44	0	0	0	0	0	0	0	antisense
AJUBA	2	21	10	1.625	0.81	1.81291	0.91	15	7.5	1	0	0	1	0	0	0	3'utr
AK3	1	17	17	0.764706	0.76	0.636822	0.64	14	14	0	0	0	0	1	0	0	start_codon
AK6	1	13	13	1	1	1.11394	1.11	13	13	0	0	0	0	0	0	0	5'utr-intron
AKAP13	1	7	7	0.857143	0.86	0.778151	0.78	7	7	0	0	0	1	0	0	0	3'utr
AKAP17A	2	39	19	1.60714	0.8	1.85733	0.93	34	17	1	0	1	0	0	0	0	5'utr
AKAP2	2	24	12	1.5625	0.78	1.59106	0.8	23	11.5	0	0	1	0	1	0	0	start_codon
AKAP8	1	9	9	0.888889	0.89	0.60206	0.6	6	6	0	0	0	0	1	0	0	start_codon
AKIRIN1	2	61	30	1.80449	0.9	2.70415	1.35	39	19.5	0	0	1	0	1	0	0	start_codon
AKIRIN2	4	142	15	3.36958	0.9	4.47903	1.1	106	13.5	3	0	0	0	1	0	0	start_codon
AKNA	3	37	12	2.8	1	3.15836	1.08	36	11	2	0	1	0	0	0	0	coding
AKR1A1	3	31	8	2.625	0.88	2.76938	0.85	27	8	2	0	0	0	0	0	0	5'utr-intron
AKR1B1	1	10	10	1	1	1	1	8	8	0	0	0	0	1	0	0	start_codon
AKR7A2	2	39	19	1.68889	0.84	1.68124	0.84	36	18	0	0	2	0	0	0	0	coding
AKT1	3	37	9	2.55556	0.86	2.13354	0.75	30	9	0	2	0	0	0	0	0	intron
AKT2	8	136	14	6.88308	0.85	7.22891	0.93	121	14	2	0	1	5	0	0	0	3'utr
AKTIP	1	7	7	1	1	0.845098	0.85	6	6	1	0	0	0	0	0	0	5'utr
AL589743.1	1	11	11	1	1	1.04139	1.04	6	6	0	0	0	1	0	0	0	3'utr
ALAD	1	10	10	1	1	1	1	5	5	1	0	0	0	0	0	0	5'utr
ALAS1	2	22	11	2	1	2.04922	1.02	17	8.5	2	0	0	0	0	0	0	5'utr
ALDH5A1	2	30	15	1.71041	0.86	1.90309	0.95	26	13	0	0	2	0	0	0	0	coding
ALDOA	4	116	10	3.49349	0.85	3.87313	0.95	91	10	1	0	1	0	1	0	0	5'utr
ALG5	1	10	10	1	1	1	1	10	10	1	0	0	0	0	0	0	5'utr
ALKBH2	3	37	7	2.48447	0.91	2.46835	0.85	29	7	2	0	0	0	1	0	0	start_codon
ALKBH3	1	40	40	0.85	0.85	1.05436	1.05	23	23	1	0	0	0	0	0	0	5'utr
ALKBH5	9	194	14	7.88704	0.89	9.17068	0.95	142	10	0	0	5	2	1	1	0	start_codon
ALKBH7	1	9	9	0.888889	0.89	0.60206	0.6	7	7	0	0	0	0	1	0	0	start_codon
ALMS1	1	9	9	0.888889	0.89	0.60206	0.6	8	8	0	0	1	0	0	0	0	coding
ALOX5AP	1	7	7	1	1	0.845098	0.85	6	6	0	0	0	0	1	0	0	start_codon
ALYREF	4	66	15	3.43588	0.86	3.97128	0.95	50	12.5	0	0	2	1	1	0	0	3'utr
AMH	9	128	14	7.81775	0.89	8.88005	1	103	11	0	0	7	0	0	1	0	coding
AMMECR1L	2	30	15	1.65217	0.83	1.54407	0.77	27	13.5	1	0	0	1	0	0	0	3'utr
AMOTL1	2	15	7	1.85714	0.93	1.68124	0.84	13	6.5	2	0	0	0	0	0	0	5'utr
AMPD2	3	61	23	2.78114	0.96	3.42991	1.36	51	19	3	0	0	0	0	0	0	5'utr
AMZ2	2	109	54	1.83423	0.92	2.49415	1.25	95	47.5	1	0	0	0	0	0	0	5'utr-intron
AMZ2P1	1	21	21	0.857143	0.86	0.954243	0.95	19	19	0	0	0	0	0	0	0	processed_transcript
ANAPC1	1	19	19	0.842105	0.84	0.726999	0.73	18	18	1	0	0	0	0	0	0	5'utr
ANAPC11	2	75	37	1.83582	0.92	2.04922	1.02	51	25.5	1	0	0	0	0	0	0	5'utr
ANAPC13	2	33	16	1.84211	0.92	2.35025	1.18	24	12	0	0	0	0	0	0	0	5'utr-intron
ANAPC16	1	36	36	0.833333	0.83	0.778151	0.78	29	29	0	0	0	0	0	0	0	5'utr-intron
ANGEL1	1	7	7	0.714286	0.71	0.69897	0.7	6	6	0	0	1	0	0	0	0	coding
ANKH	4	76	16	3.46096	0.88	4.07679	1.02	52	11.5	3	1	0	0	0	0	0	intron
ANKHD1	4	86	18	3.00745	0.79	3.5555	0.94	73	17.5	1	0	3	0	0	0	0	5'utr
ANKIB1	1	10	10	0.9	0.9	0.653213	0.65	9	9	1	0	0	0	0	0	0	5'utr
ANKLE2	1	141	141	0.801418	0.8	0.848958	0.85	106	106	0	0	0	0	1	0	0	start_codon
ANKRA2	2	26	13	1.88889	0.94	2.10721	1.05	15	7.5	2	0	0	0	0	0	0	5'utr
ANKRD10	5	215	13	4.39092	0.86	4.89432	0.95	161	12	0	0	4	0	1	0	0	coding
ANKRD11	18	653	23	15.0118	0.84	17.982	0.87	413	13.5	3	1	11	2	1	0	0	3'utr
ANKRD13A	1	9	9	0.875	0.88	0.845098	0.85	7	7	1	0	0	0	0	0	0	5'utr
ANKRD13B	2	17	8	1.65714	0.83	1.68124	0.84	15	7.5	0	0	0	0	0	0	0	retained_intron
ANKRD13D	6	106	14	5.04167	0.87	5.75962	0.98	90	12	4	1	0	0	1	0	0	5'utr
ANKRD16	3	39	8	2.875	1	3.10992	0.9	28	7	3	0	0	0	0	0	0	5'utr
ANKRD18DP	2	24	12	1.48889	0.74	1.8451	0.92	19	9.5	0	0	0	0	0	0	0	processed_transcript
ANKRD40	1	7	7	1	1	0.845098	0.85	6	6	1	0	0	0	0	0	0	5'utr
ANKRD50	1	8	8	0.75	0.75	0.778151	0.78	8	8	1	0	0	0	0	0	0	5'utr
ANKRD54	1	7	7	0.714286	0.71	0.69897	0.7	6	6	0	0	1	0	0	0	0	coding
ANKS6	1	8	8	0.875	0.88	0.845098	0.85	8	8	0	0	1	0	0	0	0	coding
ANO6	2	15	7	2	1	1.74819	0.87	10	5	2	0	0	0	0	0	0	5'utr
ANP32A	4	184	35	3.05324	0.87	4.06455	1.07	105	18.5	2	0	1	1	0	0	0	3'utr
ANP32B	4	109	21	2.73232	0.72	3.87134	1.03	76	18	2	0	2	0	0	0	0	5'utr
ANP32BP1	1	10	10	1	1	1	1	5	5	0	0	0	0	0	0	0	processed_transcript
ANP32E	4	160	29	3.23398	0.82	3.75804	0.94	137	28	4	0	0	0	0	0	0	5'utr
ANTXR2	3	42	16	2.875	1	3.30449	1.2	36	12	3	0	0	0	0	0	0	5'utr
ANXA11	1	16	16	1	1	1.20412	1.2	14	14	1	0	0	0	0	0	0	5'utr
AP1AR	1	19	19	1	1	1.27875	1.28	12	12	1	0	0	0	0	0	0	5'utr
AP1G1	3	23	7	2.52381	0.86	2.4014	0.78	22	7	2	1	0	0	0	0	0	5'utr
AP1M1	1	7	7	0.857143	0.86	0.778151	0.78	6	6	1	0	0	0	0	0	0	5'utr
AP1S1	5	48	9	4.59957	0.91	4.68664	0.95	43	9	0	0	1	3	0	1	0	coding
AP2A1	1	8	8	1	1	0.90309	0.9	8	8	1	0	0	0	0	0	0	5'utr
AP2B1	1	10	10	0.9	0.9	0.653213	0.65	6	6	0	1	0	0	0	0	0	intron
AP2M1	1	18	18	0.888889	0.89	1.20412	1.2	14	14	1	0	0	0	0	0	0	5'utr
AP2S1	1	53	53	0.811321	0.81	0.730378	0.73	42	42	1	0	0	0	0	0	0	5'utr
AP3D1	1	27	27	0.851852	0.85	1.36173	1.36	26	26	1	0	0	0	0	0	0	5'utr
AP5M1	2	40	20	1.84375	0.92	2.33646	1.17	16	8	1	0	1	0	0	0	0	5'utr
APAF1	2	16	8	1.875	0.94	1.74819	0.87	13	6.5	2	0	0	0	0	0	0	5'utr
APBA2	2	17	8	1.85714	0.93	1.77815	0.89	16	8	1	0	1	0	0	0	0	5'utr
APBA3	1	16	16	0.9375	0.94	1.17609	1.18	13	13	1	0	0	0	0	0	0	5'utr
APBB3	1	8	8	0.875	0.88	0.845098	0.85	8	8	1	0	0	0	0	0	0	5'utr
APEX1	2	238	119	1.70522	0.85	2.5721	1.29	144	72	0	0	0	0	1	0	0	5'utr-intron
APEX2	2	29	14	1.95455	0.98	1.86629	0.93	14	7	0	0	2	0	0	0	0	coding
APH1A	6	131	15	5.0545	0.87	6.72686	1	89	11.5	1	0	1	2	1	1	0	3'utr
APITD1-CORT	2	41	20	1.87879	0.94	1.76343	0.88	29	14.5	2	0	0	0	0	0	0	5'utr
APOBEC3D	1	13	13	0.923077	0.92	1.07918	1.08	12	12	0	0	0	1	0	0	0	3'utr
APOL2	3	68	28	2.4619	0.8	2.66049	0.64	56	17	2	0	0	0	0	0	0	5'utr
APOL6	4	52	11	3.41537	0.85	3.66792	0.85	49	10	0	0	0	3	1	0	0	start_codon
APOO	1	11	11	0.909091	0.91	1	1	11	11	0	1	0	0	0	0	0	intron
APPBP2	1	10	10	0.8	0.8	0.90309	0.9	9	9	1	0	0	0	0	0	0	5'utr
APRT	1	7	7	0.857143	0.86	0.778151	0.78	7	7	0	0	1	0	0	0	0	coding
ARAF	1	7	7	1	1	0.845098	0.85	6	6	0	0	1	0	0	0	0	coding
ARAP1	1	7	7	0.857143	0.86	0.778151	0.78	6	6	0	0	1	0	0	0	0	coding
AREL1	1	7	7	1	1	0.845098	0.85	7	7	1	0	0	0	0	0	0	5'utr
ARF1	5	73	14	4.35714	0.93	4.82558	1.04	56	11	0	0	0	3	1	0	0	5'utr-intron
ARF3	6	202	14	5.22733	0.89	6.05606	1.06	155	11.5	3	1	0	2	0	0	0	3'utr
ARF4	1	10	10	0.6	0.6	0.778151	0.78	9	9	1	0	0	0	0	0	0	5'utr
ARF5	2	47	23	1.62179	0.81	1.70757	0.85	38	19	0	0	0	1	1	0	0	start_codon
ARF6	7	928	91	6.12165	0.84	8.17208	1.04	520	39	2	0	3	1	0	0	0	5'utr
ARFGAP1	5	61	11	4.15108	0.86	4.08938	0.78	56	11	0	1	0	4	0	0	0	intron
ARFGEF1	3	27	8	2.75	1	2.72263	0.9	23	7	3	0	0	0	0	0	0	5'utr
ARGLU1	3	79	19	2.46946	0.83	3.02243	1.11	57	11	2	0	0	0	1	0	0	start_codon
ARHGAP1	1	8	8	1	1	0.90309	0.9	7	7	0	0	0	1	0	0	0	3'utr
ARHGAP11A	5	121	18	4.32115	0.89	4.92373	1.11	84	14	4	0	0	0	1	0	0	5'utr
ARHGAP11B	5	97	11	4.15605	0.86	4.93571	1	75	11	4	0	0	0	0	0	0	nonsense_mediated_decay
ARHGAP30	8	185	11	6.46169	0.83	7.36219	0.87	131	8.5	3	0	3	1	1	0	0	3'utr
ARHGAP33	1	12	12	1	1	1.07918	1.08	7	7	0	0	1	0	0	0	0	coding
ARHGAP35	2	15	7	1.58929	0.79	1.54407	0.77	14	7	0	0	0	2	0	0	0	3'utr
ARHGDIA	6	78	9	5.18984	0.85	5.32205	0.87	72	8.5	0	1	0	5	0	0	0	3'utr
ARHGDIB	1	9	9	1	1	0.954243	0.95	8	8	0	0	1	0	0	0	0	coding
ARHGEF1	9	128	13	7.41257	0.79	7.57198	0.74	97	9	1	0	6	2	0	0	0	5'utr
ARHGEF18	1	7	7	0.857143	0.86	0.778151	0.78	7	7	1	0	0	0	0	0	0	5'utr
ARHGEF2	3	32	11	2.83766	0.93	2.65801	0.85	20	8	1	0	1	1	0	0	0	3'utr
ARHGEF3	1	10	10	0.9	0.9	0.954243	0.95	7	7	1	0	0	0	0	0	0	5'utr
ARHGEF7	1	31	31	0.83871	0.84	0.937852	0.94	22	22	0	0	1	0	0	0	0	coding
ARID1A	18	555	19	14.1332	0.8	16.7201	0.89	367	15.5	4	0	13	0	1	0	0	5'utr
ARID4B	1	15	15	0.933333	0.93	1.14613	1.15	12	12	1	0	0	0	0	0	0	5'utr
ARIH1	2	53	26	1.49714	0.75	2.2833	1.14	43	21.5	0	0	1	0	1	0	0	start_codon
ARIH2	1	37	37	0.675676	0.68	1.39794	1.4	31	31	1	0	0	0	0	0	0	5'utr
ARL1	1	8	8	0.875	0.88	0.845098	0.85	8	8	1	0	0	0	0	0	0	5'utr
ARL13B	2	72	36	1.72222	0.86	2.25164	1.13	60	30	1	0	0	0	1	0	0	5'utr
ARL14EP	1	13	13	1	1	1.11394	1.11	12	12	1	0	0	0	0	0	0	5'utr
ARL2BP	2	20	10	1.79798	0.9	1.30103	0.65	16	8	2	0	0	0	0	0	0	5'utr
ARL3	1	7	7	0.571429	0.57	0.60206	0.6	7	7	1	0	0	0	0	0	0	5'utr
ARL4C	8	169	14	6.41206	0.82	7.41724	0.95	122	9.5	4	0	2	2	0	0	0	3'utr
ARL5B	2	208	104	1.72141	0.86	2.48058	1.24	94	47	2	0	0	0	0	0	0	5'utr
ARL6IP1	2	100	50	1.79664	0.9	2.35793	1.18	87	43.5	0	0	1	0	1	0	0	coding
ARL6IP4	2	20	10	1.81818	0.91	1.60746	0.8	16	8	0	0	1	0	0	0	0	coding-intron
ARL6IP6	1	9	9	0.888889	0.89	0.60206	0.6	7	7	0	0	1	0	0	0	0	coding
ARL8B	1	33	33	0.969697	0.97	1.50515	1.51	28	28	1	0	0	0	0	0	0	5'utr
ARMC1	1	23	23	0.913043	0.91	1.32222	1.32	15	15	1	0	0	0	0	0	0	5'utr
ARMC10	2	76	38	1.7551	0.88	2.3006	1.15	61	30.5	1	0	0	0	1	0	0	5'utr
ARMC10P1	1	25	25	0.92	0.92	1.0607	1.06	13	13	0	0	0	0	0	0	0	processed_pseudogene
ARMC6	2	18	9	1.77778	0.89	1.20412	0.6	17	8.5	2	0	0	0	0	0	0	5'utr
ARMC7	5	68	10	4.1375	0.88	4.57749	0.85	48	9	3	0	1	0	1	0	0	5'utr
ARMCX3	4	112	23	3.55159	0.87	4.22069	1.06	73	20.5	3	0	0	0	1	0	0	5'utr
ARMCX4	1	16	16	0.875	0.88	0.845098	0.85	8	8	0	0	0	0	0	0	0	nonsense_mediated_decay
ARMCX6	1	13	13	0.846154	0.85	1.04139	1.04	12	12	1	0	0	0	0	0	0	5'utr
ARPC1A	1	32	32	0.34375	0.34	0.740363	0.74	10	10	1	0	0	0	0	0	0	5'utr
ARPC1B	3	62	10	2.50159	0.86	2.76343	0.99	33	8	2	0	1	0	0	0	0	5'utr
ARPC2	3	178	17	2.57863	0.86	3.16979	1.08	108	15	1	0	0	0	1	0	0	5'utr
ARPC3	1	11	11	1	1	1.04139	1.04	9	9	0	0	0	0	1	0	0	start_codon
ARPC4	1	17	17	0.705882	0.71	0.778151	0.78	15	15	0	0	1	0	0	0	0	coding
ARPC5	2	125	62	1.92035	0.96	2.61909	1.31	103	51.5	0	0	1	0	1	0	0	coding
ARPC5L	5	150	36	4.24182	0.85	5.41128	1.19	126	32	1	0	2	1	1	0	0	5'utr
ARPP19	2	26	13	1.65278	0.83	1.99123	1	22	11	1	0	0	0	0	0	0	5'utr
ARRB1	1	11	11	0.818182	0.82	0.653213	0.65	8	8	0	0	0	0	1	0	0	start_codon
ARRDC1	1	7	7	0.857143	0.86	0.778151	0.78	7	7	0	0	1	0	0	0	0	coding
ARRDC1-AS1	2	21	10	1.81818	0.91	1.95424	0.98	18	9	0	0	0	0	0	0	0	antisense
ARRDC2	2	15	7	1.58929	0.79	1.54407	0.77	13	6.5	2	0	0	0	0	0	0	5'utr
ASAP1	1	8	8	0.75	0.75	0.778151	0.78	8	8	0	1	0	0	0	0	0	intron
ASB1	2	17	8	1.8	0.9	1.74819	0.87	16	8	1	0	0	1	0	0	0	5'utr
ASB6	1	26	26	0.84	0.84	0.845098	0.85	22	22	1	0	0	0	0	0	0	5'utr
ASB7	2	26	13	1.4902	0.75	1.62325	0.81	17	8.5	2	0	0	0	0	0	0	5'utr
ASCC3	1	15	15	0.666667	0.67	0.69897	0.7	14	14	1	0	0	0	0	0	0	5'utr
ASF1A	2	127	63	1.73024	0.87	2.38322	1.19	96	48	1	0	0	0	1	0	0	5'utr
ASF1B	1	13	13	0.923077	0.92	1.07918	1.08	8	8	1	0	0	0	0	0	0	5'utr
ASH1L	2	19	9	2	1	1.95424	0.98	16	8	2	0	0	0	0	0	0	5'utr
ASIC2	2	32	16	2	1	2.2833	1.14	16	8	0	2	0	0	0	0	0	intron
ASNA1	1	11	11	0.909091	0.91	0.69897	0.7	10	10	0	0	0	0	1	0	0	start_codon
ASPHD2	1	12	12	0.833333	0.83	0.69897	0.7	9	9	1	0	0	0	0	0	0	5'utr
ASPM	2	38	19	1.57423	0.79	2.04336	1.02	31	15.5	2	0	0	0	0	0	0	5'utr
ASRGL1	2	21	10	1.85714	0.93	1.92428	0.96	19	9.5	1	1	0	0	0	0	0	5'utr
ASXL1	6	69	8	4.88212	0.84	5.50236	0.84	58	8	0	0	4	1	0	0	0	5'utr-intron
ATAD2	1	11	11	0.636364	0.64	0.845098	0.85	10	10	0	0	1	0	0	0	0	coding
ATAD2B	2	19	9	1.91667	0.96	1.58546	0.79	16	8	1	0	0	0	1	0	0	start_codon
ATAD3A	1	12	12	0.916667	0.92	0.740363	0.74	7	7	1	0	0	0	0	0	0	5'utr
ATAD3B	1	10	10	1	1	1	1	6	6	1	0	0	0	0	0	0	5'utr
ATF1	4	45	10	3.33589	0.85	3.29226	0.77	36	9	0	0	0	0	0	0	0	nonsense_mediated_decay
ATF2	1	17	17	0.705882	0.71	0.778151	0.78	17	17	1	0	0	0	0	0	0	5'utr
ATF3	2	62	31	1.76515	0.88	2.48785	1.24	44	22	2	0	0	0	0	0	0	5'utr
ATF4	5	277	18	3.78332	0.78	4.84044	1.03	149	14	2	0	2	1	0	0	0	5'utr
ATF4P4	1	9	9	0.888889	0.89	0.90309	0.9	9	9	0	0	0	0	0	0	0	processed_transcript
ATF7IP2	1	7	7	0.857143	0.86	0.778151	0.78	7	7	1	0	0	0	0	0	0	5'utr
ATG101	5	203	18	4.38278	0.9	5.85158	1.11	157	16	3	0	0	0	1	0	0	5'utr
ATG13	4	43	10	3.54167	0.9	3.50974	0.85	40	8.5	3	0	0	1	0	0	0	5'utr
ATG14	1	8	8	0.875	0.88	0.845098	0.85	7	7	0	0	1	0	0	0	0	coding
ATG3	2	120	60	1.81416	0.91	1.96379	0.98	72	36	2	0	0	0	0	0	0	5'utr
ATG4B	5	44	9	4.39798	0.91	4.37144	0.85	37	9	0	1	0	3	1	0	0	start_codon
ATG4D	4	70	11	3.4	0.83	3.65868	0.87	55	8	2	0	1	0	1	0	0	5'utr
ATG5	2	81	40	1.63889	0.82	2.16037	1.08	64	32	1	0	0	0	1	0	0	start_codon
ATL3	2	50	25	1.6369	0.82	1.87313	0.94	38	19	1	0	0	0	0	0	0	5'utr
ATM	2	23	11	1.63333	0.82	1.60206	0.8	18	9	2	0	0	0	0	0	0	5'utr
ATMIN	2	25	12	1.52381	0.76	1.5563	0.78	20	10	0	0	1	0	1	0	0	start_codon
ATN1	4	343	94	2.81694	0.84	4.17098	1.12	215	60.5	0	4	0	0	0	0	0	intron
ATP11A	1	10	10	0.8	0.8	0.90309	0.9	10	10	0	0	0	0	1	0	0	start_codon
ATP11B	1	15	15	0.933333	0.93	1.14613	1.15	11	11	1	0	0	0	0	0	0	5'utr
ATP13A2	1	14	14	0.642857	0.64	0.954243	0.95	11	11	1	0	0	0	0	0	0	5'utr
ATP13A3	3	61	20	2.48971	0.85	3.36558	1.23	44	13	0	3	0	0	0	0	0	intron
ATP1A1	2	60	30	1.72549	0.86	1.74429	0.87	41	20.5	1	0	0	0	0	0	0	retained_intron
ATP2A2	6	504	55	4.78381	0.76	7.3883	1.25	298	38	6	0	0	0	0	0	0	5'utr
ATP2A3	6	78	11	5.09945	0.83	5.06685	0.84	68	9.5	1	0	1	4	0	0	0	3'utr
ATP5A1	3	111	26	2.65059	0.88	3.23534	1.06	69	26	0	1	1	0	0	0	0	intron
ATP5B	2	63	31	1.65833	0.83	2.09167	1.05	51	25.5	0	0	2	0	0	0	0	coding
ATP5C1	1	23	23	0.73913	0.74	0.929419	0.93	22	22	0	0	0	0	1	0	0	start_codon
ATP5D	2	68	34	1.7958	0.9	2.76042	1.38	56	28	0	0	1	0	1	0	0	start_codon
ATP5E	3	35	13	2.62637	0.86	2.68124	0.9	32	11	1	0	2	0	0	0	0	coding
ATP5EP2	1	10	10	1	1	1	1	8	8	0	0	0	0	1	0	0	start_codon
ATP5G1	1	7	7	1	1	0.845098	0.85	7	7	0	0	1	0	0	0	0	coding
ATP5G2	5	155	19	3.82063	0.81	4.21812	0.83	129	17	0	0	2	1	1	1	0	3'utr
ATP5G2P1	1	7	7	0.714286	0.71	0.69897	0.7	7	7	0	0	0	0	0	0	0	processed_pseudogene
ATP5G3	4	75	8	3.2033	0.85	3.36361	0.81	65	8	0	0	2	1	1	0	0	3'utr
ATP5H	1	13	13	0.846154	0.85	0.740363	0.74	10	10	1	0	0	0	0	0	0	5'utr
ATP5I	4	57	11	3.59492	0.89	3.96454	0.9	39	9	0	0	1	1	1	0	0	3'utr
ATP5J	5	143	11	3.96719	0.73	4.41	0.85	112	11	2	2	1	0	0	0	0	coding
ATP5L	2	43	21	1.47443	0.74	1.6744	0.84	36	18	1	0	0	1	0	0	0	5'utr
ATP5O	1	8	8	1	1	0.90309	0.9	7	7	0	0	0	0	1	0	0	start_codon
ATP6AP2	1	17	17	0.823529	0.82	1.14613	1.15	12	12	1	0	0	0	0	0	0	5'utr
ATP6V0B	4	110	25	3.31626	0.83	3.81637	0.8	80	19.5	2	0	0	1	0	0	0	5'utr
ATP6V0C	5	116	19	3.79305	0.75	4.21981	0.78	91	14	2	0	0	2	1	0	0	5'utr
ATP6V0E1	1	34	34	0.939394	0.94	1.19033	1.19	26	26	0	0	0	0	1	0	0	start_codon
ATP6V0E2	2	16	8	1.75	0.88	1.6902	0.85	15	7.5	0	0	1	0	1	0	0	start_codon
ATP6V1B2	1	8	8	1	1	0.90309	0.9	8	8	0	0	1	0	0	0	0	coding
ATP6V1C1	1	7	7	0.857143	0.86	0.778151	0.78	7	7	1	0	0	0	0	0	0	5'utr
ATP6V1D	1	13	13	0.692308	0.69	0.954243	0.95	10	10	1	0	0	0	0	0	0	5'utr
ATP6V1E1	1	9	9	0.5	0.5	0.60206	0.6	7	7	1	0	0	0	0	0	0	5'utr
ATP6V1F	1	20	20	0.95	0.95	0.977724	0.98	14	14	0	0	0	0	1	0	0	start_codon
ATP6V1H	1	42	42	0.833333	0.83	1.06695	1.07	40	40	1	0	0	0	0	0	0	5'utr
ATPAF1	1	12	12	0.833333	0.83	0.69897	0.7	11	11	0	0	1	0	0	0	0	coding
ATPIF1	2	58	29	1.54327	0.77	1.91558	0.96	36	18	0	0	2	0	0	0	0	coding
ATXN10	1	12	12	0.916667	0.92	0.740363	0.74	10	10	1	0	0	0	0	0	0	5'utr
ATXN1L	1	24	24	0.791667	0.79	0.977724	0.98	22	22	1	0	0	0	0	0	0	5'utr
ATXN2	1	7	7	0.857143	0.86	0.778151	0.78	6	6	0	0	1	0	0	0	0	coding
ATXN2L	7	108	12	5.99099	0.83	6.4741	0.85	75	9	2	1	3	0	0	0	0	retained_intron
ATXN7L3	8	207	13	6.74799	0.83	8.02067	0.92	146	8.5	0	0	0	1	0	0	0	3'utr
AUP1	2	17	8	1.76389	0.88	1.74819	0.87	16	8	1	0	1	0	0	0	0	coding
AURKA	2	28	14	1.70833	0.85	2.02119	1.01	24	12	2	0	0	0	0	0	0	5'utr
AURKAIP1	11	239	15	9.70208	0.92	11.9477	1.04	165	10	6	0	2	0	1	0	0	coding
AURKB	1	7	7	0.857143	0.86	0.778151	0.78	6	6	1	0	0	0	0	0	0	5'utr
AUTS2	6	63	9	5.39683	0.94	5.30929	0.87	56	8.5	0	5	1	0	0	0	0	intron
AVL9	1	37	37	0.891892	0.89	1.21748	1.22	21	21	0	0	0	0	0	0	0	processed_transcript
AXIN1	6	157	14	4.994	0.84	5.54133	0.89	134	11.5	2	1	2	0	0	0	0	coding
AZI2	2	88	44	1.7456	0.87	2.01773	1.01	53	26.5	2	0	0	0	0	0	0	5'utr
AZIN1	2	77	38	1.65164	0.83	2.51851	1.26	66	33	2	0	0	0	0	0	0	5'utr
B2M	6	374	21	5.07576	0.88	6.37855	0.9	174	21	0	0	0	3	1	2	0	start_codon
B3GALNT2	3	39	14	2.62996	0.89	2.52892	0.81	33	12	2	0	1	0	0	0	0	coding
B3GALT6	14	348	17	11.5963	0.83	12.5627	0.87	292	16	0	0	10	4	0	0	0	coding
B3GAT1	1	9	9	0.777778	0.78	0.845098	0.85	8	8	1	0	0	0	0	0	0	5'utr
B3GAT3	1	8	8	1	1	0.90309	0.9	8	8	0	0	1	0	0	0	0	coding
B3GNT1	2	37	18	1.68889	0.84	1.98227	0.99	29	14.5	1	0	1	0	0	0	0	coding
B3GNT2	1	19	19	0.947368	0.95	1.25527	1.26	14	14	1	0	0	0	0	0	0	5'utr
B3GNTL1	1	7	7	1	1	0.845098	0.85	6	6	0	0	0	0	0	0	0	intron-coding
B4GALNT1	2	29	14	2	1	2.32222	1.16	15	7.5	2	0	0	0	0	0	0	5'utr
B4GALT2	1	10	10	0.9	0.9	0.653213	0.65	4	4	1	0	0	0	0	0	0	5'utr
B4GALT3	1	29	29	0.862069	0.86	1.09691	1.1	19	19	1	0	0	0	0	0	0	5'utr
B4GALT4	1	12	12	0.75	0.75	0.954243	0.95	8	8	1	0	0	0	0	0	0	5'utr
B4GALT5	1	13	13	0.846154	0.85	1.04139	1.04	12	12	0	0	0	0	1	0	0	start_codon
B4GALT7	1	9	9	1	1	0.954243	0.95	7	7	0	0	0	1	0	0	0	3'utr
B9D2	1	12	12	0.833333	0.83	0.69897	0.7	9	9	1	0	0	0	0	0	0	5'utr
BABAM1	1	23	23	0.391304	0.39	0.653213	0.65	15	15	1	0	0	0	0	0	0	5'utr
BACH1	2	25	12	1.70588	0.85	1.50515	0.75	24	12	1	1	0	0	0	0	0	5'utr
BACH2	15	494	12	12.5179	0.83	15.6114	1	349	12	4	1	8	2	0	0	0	3'utr
BAG1	1	23	23	0.956522	0.96	1.34242	1.34	10	10	0	0	1	0	0	0	0	coding
BAG2	2	32	16	1.81667	0.91	1.99564	1	22	11	2	0	0	0	0	0	0	5'utr
BAG3	3	44	13	2.72308	0.92	3.32469	1.08	37	12	3	0	0	0	0	0	0	5'utr
BAG4	2	18	9	1.90909	0.95	1.8451	0.92	16	8	1	0	0	0	1	0	0	5'utr
BAG5	2	17	8	1.76389	0.88	1.74819	0.87	16	8	0	2	0	0	0	0	0	intron
BAG6	1	8	8	0.875	0.88	0.845098	0.85	8	8	1	0	0	0	0	0	0	5'utr
BAHD1	1	7	7	1	1	0.845098	0.85	6	6	0	0	0	1	0	0	0	3'utr
BAIAP2-AS1	4	56	8	3.64919	0.94	4.08264	0.93	43	7	0	0	0	0	0	0	0	lincRNA_exon
BAK1	3	41	15	2.24444	0.8	2.43457	0.6	31	10	2	0	0	1	0	0	0	3'utr
BANF1	1	21	21	0.857143	0.86	0.954243	0.95	15	15	0	0	0	0	0	0	0	5'utr-intron
BANF1P3	1	20	20	0.85	0.85	1.23045	1.23	18	18	0	0	0	0	0	0	0	processed_pseudogene
BAP1	3	39	10	2.45952	0.81	2.48572	0.78	33	9	0	0	1	1	1	0	0	3'utr
BATF3	1	49	49	0.959184	0.96	1.6721	1.67	40	40	1	0	0	0	0	0	0	5'utr
BAX	2	39	19	1.68548	0.84	1.93952	0.97	35	17.5	0	0	0	0	1	1	0	start_codon
BAZ1A	1	13	13	0.769231	0.77	1	1	10	10	1	0	0	0	0	0	0	5'utr
BAZ1B	3	78	13	2.63339	0.89	2.74194	1.06	64	11	2	0	0	0	1	0	0	start_codon
BCAP31	1	7	7	1	1	0.845098	0.85	7	7	0	0	0	0	0	0	0	5'utr-intron
BCAS2	1	36	36	0.916667	0.92	1.21748	1.22	35	35	0	0	1	0	0	0	0	coding
BCAT1	1	8	8	0.875	0.88	0.845098	0.85	8	8	1	0	0	0	0	0	0	5'utr
BCCIP	2	19	9	1.9	0.95	1.90849	0.95	17	8.5	0	0	2	0	0	0	0	coding
BCKDK	1	7	7	0.857143	0.86	0.778151	0.78	7	7	1	0	0	0	0	0	0	5'utr
BCL10	1	14	14	0.928571	0.93	1.11394	1.11	13	13	1	0	0	0	0	0	0	5'utr
BCL11B	1	9	9	1	1	0.954243	0.95	7	7	0	0	1	0	0	0	0	coding
BCL2	6	108	13	5.62177	0.95	6.32513	1.06	90	9.5	4	0	1	1	0	0	0	3'utr
BCL2L1	5	62	8	4.41855	0.89	4.60703	0.9	53	8	2	0	1	2	0	0	0	3'utr
BCL2L12	1	10	10	0.8	0.8	0.90309	0.9	10	10	0	0	1	0	0	0	0	coding
BCL2L14	3	428	17	2.28571	0.83	2.93217	1.11	113	10	0	0	0	0	0	0	0	nonsense_mediated_decay
BCL7A	5	72	15	4.06611	0.8	4.2501	0.85	55	12	1	0	0	3	1	0	0	5'utr
BCL7B	2	45	22	1.57738	0.79	1.87506	0.94	37	18.5	1	0	0	1	0	0	0	3'utr
BCL7C	2	24	12	1.84615	0.92	2.08279	1.04	20	10	1	0	0	0	1	0	0	start_codon
BCL9	1	8	8	1	1	0.90309	0.9	6	6	1	0	0	0	0	0	0	5'utr
BCL9L	3	31	9	2.93333	1	2.94547	0.95	20	6	0	0	2	1	0	0	0	3'utr
BCLAF1	1	27	27	0.851852	0.85	1.36173	1.36	23	23	1	0	0	0	0	0	0	5'utr
BCOR	6	120	16	5.31106	0.88	5.60348	0.88	85	11.5	0	5	1	0	0	0	0	coding
BCR	4	63	13	3.21804	0.81	3.2667	0.76	40	9.5	2	0	1	0	1	0	0	5'utr
BDNF-AS	1	19	19	0.947368	0.95	1.25527	1.26	11	11	0	0	0	0	0	0	0	antisense
BECN1	1	8	8	1	1	0.90309	0.9	5	5	0	0	0	0	0	0	0	5'utr-intron
BEND4	1	16	16	1	1	1.20412	1.2	14	14	0	0	1	0	0	0	0	coding
BEND5	1	8	8	0.875	0.88	0.845098	0.85	7	7	0	0	1	0	0	0	0	coding
BET1	1	9	9	1	1	0.954243	0.95	9	9	1	0	0	0	0	0	0	5'utr
BET1L	1	7	7	0.714286	0.71	0.69897	0.7	7	7	0	0	0	0	0	0	0	lincRNA_exon-lincRNA_intron
BEX1	3	43	11	2.37818	0.82	2.46835	0.85	30	10	2	0	1	0	0	0	0	coding
BEX2	1	31	31	0.967742	0.97	1.17609	1.18	15	15	0	0	0	0	0	0	0	5'utr-intron
BEX4	2	18	9	1.66667	0.83	1.74819	0.87	17	8.5	2	0	0	0	0	0	0	5'utr
BFAR	1	17	17	0.823529	0.82	0.669007	0.67	16	16	1	0	0	0	0	0	0	5'utr
BICD2	1	17	17	0.823529	0.82	0.669007	0.67	17	17	0	0	0	0	1	0	0	start_codon
BID	1	11	11	0.727273	0.73	0.90309	0.9	8	8	0	0	0	0	1	0	0	start_codon
BIN3	2	18	9	1.38961	0.69	1.5563	0.78	18	9	1	0	0	1	0	0	0	3'utr
BIRC2	2	35	17	1.94444	0.97	2.4609	1.23	26	13	1	0	0	0	0	0	0	processed_transcript
BIRC3	3	60	21	2.14574	0.71	2.19382	0.7	56	20	2	0	0	0	0	0	0	5'utr-intron
BIRC5	6	88	13	5.19618	0.87	4.82913	0.81	78	12	0	0	1	4	1	0	0	start_codon
BIVM	2	41	20	1.74638	0.87	2.19728	1.1	36	18	0	2	0	0	0	0	0	intron
BLM	1	26	26	0.923077	0.92	1.07918	1.08	16	16	1	0	0	0	0	0	0	5'utr
BLOC1S1	2	14	7	1.57143	0.79	1.47712	0.74	12	6	0	2	0	0	0	0	0	intron
BLOC1S3	1	22	22	0.954545	0.95	1.02119	1.02	8	8	0	0	1	0	0	0	0	coding
BLOC1S5	1	19	19	0.894737	0.89	0.929419	0.93	11	11	0	0	0	0	1	0	0	start_codon
BLOC1S6	1	11	11	1	1	1.04139	1.04	6	6	0	0	1	0	0	0	0	coding
BLVRA	1	8	8	0.875	0.88	0.845098	0.85	8	8	0	0	1	0	0	0	0	coding
BLZF1	1	22	22	0.818182	0.82	1.25527	1.26	20	20	1	0	0	0	0	0	0	5'utr
BMI1	5	167	35	3.77832	0.8	4.89107	0.9	133	24	4	1	0	0	0	0	0	5'utr
BMP2K	3	43	17	2.67802	0.94	2.89432	0.85	41	15	1	0	1	0	0	0	0	nonsense_mediated_decay
BMPR1A	1	8	8	0.625	0.63	0.69897	0.7	7	7	1	0	0	0	0	0	0	5'utr
BMS1	1	15	15	0.933333	0.93	1.14613	1.15	12	12	0	0	0	0	0	0	0	5'utr-intron
BNIP2	2	57	28	1.79362	0.9	2.57749	1.29	41	20.5	0	0	2	0	0	0	0	coding
BNIP3	1	9	9	0.777778	0.78	0.845098	0.85	9	9	1	0	0	0	0	0	0	5'utr
BOD1	2	16	8	1.60317	0.8	1.30103	0.65	13	6.5	1	0	1	0	0	0	0	coding
BOLA1	2	17	8	2	1	1.85733	0.93	16	8	0	1	0	0	1	0	0	intron
BOLA2	3	77	28	2.64286	0.86	3.19312	1	40	9	1	0	2	0	0	0	0	coding
BOLA2B	2	72	36	1.85445	0.93	2.73719	1.37	50	25	0	0	1	0	0	0	0	coding-intron
BOLA3	2	16	8	2	1	1.80618	0.9	11	5.5	1	0	1	0	0	0	0	coding
BORA	1	10	10	0.8	0.8	0.60206	0.6	10	10	0	0	1	0	0	0	0	coding
BPTF	1	14	14	0.857143	0.86	1.07918	1.08	8	8	1	0	0	0	0	0	0	5'utr
BRAP	1	13	13	0.846154	0.85	1.04139	1.04	12	12	1	0	0	0	0	0	0	5'utr
BRAT1	2	14	7	1.52381	0.76	1.38021	0.69	11	5.5	0	0	2	0	0	0	0	coding
BRCA1	1	10	10	0.8	0.8	0.60206	0.6	7	7	1	0	0	0	0	0	0	5'utr
BRD1	1	15	15	0.866667	0.87	0.812913	0.81	12	12	0	0	1	0	0	0	0	coding
BRD2	17	332	12	15.1641	0.89	16.7814	1	298	12	13	1	2	1	0	0	0	5'utr
BRD3	3	27	8	2.875	1	2.78958	0.9	20	6	0	0	2	1	0	0	0	3'utr
BRD4	5	105	11	4.40053	0.86	4.41529	0.85	79	10	2	0	0	3	0	0	0	3'utr
BRD7	1	31	31	0.806452	0.81	0.920819	0.92	18	18	1	0	0	0	0	0	0	5'utr
BRF1	2	32	16	1.68826	0.84	2.24551	1.12	30	15	2	0	0	0	0	0	0	5'utr
BRI3	1	24	24	0.833333	0.83	1	1	21	21	1	0	0	0	0	0	0	5'utr
BRI3BP	2	29	14	1.5119	0.76	1.68124	0.84	23	11.5	0	0	1	1	0	0	0	coding
BRIP1	1	16	16	0.8125	0.81	0.636822	0.64	14	14	1	0	0	0	0	0	0	5'utr
BRK1	2	34	17	1.64706	0.82	1.68797	0.84	29	14.5	0	0	0	1	1	0	0	start_codon
BRPF1	3	63	21	2.70996	0.95	3.35218	1.1	49	20	2	0	0	0	0	0	0	5'utr
BRWD1	1	13	13	0.615385	0.62	0.90309	0.9	12	12	0	0	0	0	1	0	0	start_codon
BSG	2	38	19	1.65714	0.83	1.98227	0.99	35	17.5	0	0	0	1	1	0	0	start_codon
BTBD1	1	10	10	0.7	0.7	0.845098	0.85	10	10	0	0	1	0	0	0	0	coding
BTBD11	1	7	7	1	1	0.845098	0.85	5	5	1	0	0	0	0	0	0	5'utr
BTBD2	2	50	25	1.26103	0.63	1.99123	1	34	17	0	0	1	0	1	0	0	coding
BTBD6	3	28	7	2.57143	0.86	2.63548	0.78	20	7	0	1	2	0	0	0	0	intron
BTBD7	1	40	40	0.65	0.65	0.716003	0.72	40	40	0	0	0	0	1	0	0	start_codon
BTF3	2	143	71	1.74163	0.87	2.40767	1.2	107	53.5	0	0	0	0	0	0	0	5'utr-intron
BTF3L4	1	7	7	1	1	0.845098	0.85	6	6	0	0	0	0	0	0	0	intron-5'utr
BTG1	3	164	50	2.43561	0.82	3.08327	1	135	35	3	0	0	0	0	0	0	5'utr
BTG3	2	81	40	1.63099	0.82	1.67394	0.84	56	28	2	0	0	0	0	0	0	5'utr
BTN2A1	2	29	14	1.58947	0.79	2.07918	1.04	25	12.5	2	0	0	0	0	0	0	5'utr
BTN3A1	1	11	11	0.636364	0.64	0.845098	0.85	11	11	1	0	0	0	0	0	0	5'utr
BTN3A2	1	9	9	0.666667	0.67	0.778151	0.78	9	9	1	0	0	0	0	0	0	5'utr
BUB1B	1	15	15	1	1	1.17609	1.18	13	13	1	0	0	0	0	0	0	5'utr
BUB3	1	7	7	1	1	0.845098	0.85	5	5	0	0	1	0	0	0	0	coding
BUD31	3	37	10	2.36429	0.8	2.53148	0.9	35	9	2	0	0	0	1	0	0	5'utr
BX322557.10	8	109	10	6.68815	0.87	6.4772	0.8	95	9	0	0	0	0	0	0	0	lincRNA_exon
BZW1	2	23	11	2	1	2.12057	1.06	21	10.5	1	0	1	0	0	0	0	5'utr
BZW1P2	1	8	8	1	1	0.90309	0.9	4	4	0	0	0	0	0	0	0	processed_pseudogene
BZW2	1	12	12	0.916667	0.92	1.04139	1.04	9	9	1	0	0	0	0	0	0	5'utr
C10orf2	3	111	32	2.64236	0.91	2.51326	0.85	73	23	0	0	0	0	0	0	0	processed_transcript
C10orf35	1	17	17	0.882353	0.88	0.875061	0.88	10	10	1	0	0	0	0	0	0	5'utr
C10orf76	1	18	18	1	1	1.25527	1.26	17	17	1	0	0	0	0	0	0	5'utr
C11orf24	1	10	10	0.8	0.8	0.90309	0.9	9	9	0	0	0	0	0	0	0	processed_transcript
C11orf31	3	277	50	2.77314	0.92	4.49686	1.36	103	27	0	0	1	0	1	0	0	start_codon
C11orf57	4	37	9	3.81818	1	3.46479	0.93	35	8.5	4	0	0	0	0	0	0	5'utr
C11orf58	1	80	80	0.475	0.48	0.676694	0.68	41	41	0	0	0	0	1	0	0	start_codon
C11orf68	1	11	11	0.818182	0.82	0.653213	0.65	9	9	0	0	1	0	0	0	0	coding
C11orf84	3	23	7	2.46032	0.86	2.38021	0.78	21	6	2	0	1	0	0	0	0	5'utr
C11orf95	4	43	9	3.04444	0.79	2.82737	0.69	36	9	0	0	0	4	0	0	0	3'utr
C12orf49	1	105	105	0.828571	0.83	1.03643	1.04	64	64	1	0	0	0	0	0	0	5'utr
C12orf57	4	50	13	3.5042	0.87	3.7214	0.91	38	8	1	0	3	0	0	0	0	5'utr
C12orf65	1	21	21	0.809524	0.81	0.929419	0.93	12	12	0	0	1	0	0	0	0	coding
C12orf66	1	11	11	1	1	1.04139	1.04	7	7	1	0	0	0	0	0	0	5'utr
C12orf73	1	7	7	0.714286	0.71	0.69897	0.7	7	7	0	0	0	0	0	0	0	5'utr-intron
C12orf75	1	10	10	1	1	1	1	8	8	0	0	0	0	1	0	0	start_codon
C14orf1	1	18	18	0.777778	0.78	1.14613	1.15	15	15	1	0	0	0	0	0	0	5'utr
C14orf119	1	7	7	1	1	0.845098	0.85	7	7	1	0	0	0	0	0	0	5'utr
C14orf142	1	8	8	0.875	0.88	0.845098	0.85	8	8	0	0	1	0	0	0	0	coding
C14orf166	1	10	10	0.9	0.9	0.653213	0.65	10	10	1	0	0	0	0	0	0	5'utr
C14orf169	1	11	11	1	1	1.04139	1.04	10	10	0	0	1	0	0	0	0	coding
C14orf2	1	16	16	0.875	0.88	1.14613	1.15	14	14	0	0	0	1	0	0	0	3'utr
C15orf39	1	7	7	0.857143	0.86	0.778151	0.78	6	6	0	0	0	1	0	0	0	3'utr
C15orf61	2	15	7	2	1	1.74819	0.87	13	6.5	1	0	1	0	0	0	0	5'utr
C16orf13	1	8	8	0.75	0.75	0.778151	0.78	7	7	0	0	1	0	0	0	0	coding
C16orf72	3	418	118	2.5561	0.87	3.17394	1.09	263	80	1	0	1	0	1	0	0	5'utr
C16orf91	4	58	10	3.58381	0.9	4.20074	0.96	37	8	0	0	2	0	0	0	0	coding
C17orf49	1	10	10	0.9	0.9	0.954243	0.95	9	9	0	0	0	1	0	0	0	3'utr
C17orf51	1	15	15	0.933333	0.93	1.14613	1.15	12	12	1	0	0	0	0	0	0	5'utr
C17orf62	5	64	12	4.5438	0.92	5.23452	1.04	61	11	1	0	2	1	0	0	0	3'utr
C17orf85	1	8	8	0.875	0.88	0.845098	0.85	8	8	0	0	1	0	0	0	0	coding
C17orf96	8	170	15	6.93523	0.87	7.90001	0.97	136	12.5	4	0	2	1	1	0	0	3'utr
C18orf25	2	95	47	1.56564	0.78	2.6744	1.34	68	34	2	0	0	0	0	0	0	5'utr
C18orf32	2	27	13	1.88235	0.94	1.69897	0.85	17	8.5	2	0	0	0	0	0	0	5'utr
C18orf54	4	60	12	2.94489	0.73	3.40312	0.83	55	11	0	4	0	0	0	0	0	intron
C19orf12	2	29	14	1.77273	0.89	1.47349	0.74	28	14	1	0	0	0	0	1	0	stop_codon
C19orf24	6	108	11	4.51585	0.82	5.75337	0.87	70	8.5	0	0	3	2	1	0	0	start_codon
C19orf43	2	166	83	1.77726	0.89	1.9235	0.96	112	56	0	0	1	0	1	0	0	coding
C19orf48	4	35	9	3.67778	0.89	3.30449	0.87	33	8.5	2	0	2	0	0	0	0	coding
C19orf53	1	17	17	0.941176	0.94	1.20412	1.2	15	15	0	0	1	0	0	0	0	coding
C19orf54	5	66	14	4.36817	0.86	4.89971	0.95	56	11	0	0	1	0	0	0	0	coding
C19orf60	1	19	19	1	1	1.27875	1.28	8	8	0	0	0	0	0	0	0	coding-intron
C19orf66	1	9	9	0.888889	0.89	0.90309	0.9	9	9	1	0	0	0	0	0	0	5'utr
C19orf70	1	7	7	1	1	0.845098	0.85	2	2	0	0	1	0	0	0	0	coding
C19orf81	1	35	35	0.942857	0.94	1.21748	1.22	26	26	0	0	1	0	0	0	0	coding
C1GALT1	1	16	16	0.875	0.88	1.14613	1.15	9	9	1	0	0	0	0	0	0	5'utr
C1QBP	2	141	70	1.59942	0.8	2.10834	1.05	110	55	0	0	2	0	0	0	0	coding
C1orf109	1	11	11	0.818182	0.82	0.954243	0.95	10	10	1	0	0	0	0	0	0	5'utr
C1orf122	2	31	15	1.61818	0.81	1.25527	0.63	24	12	1	0	1	0	0	0	0	5'utr
C1orf159	1	8	8	1	1	0.90309	0.9	8	8	0	0	0	0	0	0	0	5'utr-intron
C1orf174	1	12	12	0.833333	0.83	1	1	7	7	1	0	0	0	0	0	0	5'utr
C1orf198	1	7	7	1	1	0.845098	0.85	6	6	0	0	1	0	0	0	0	coding
C1orf228	1	7	7	0.857143	0.86	0.778151	0.78	5	5	0	1	0	0	0	0	0	intron
C1orf35	1	8	8	1	1	0.90309	0.9	8	8	1	0	0	0	0	0	0	5'utr
C1orf43	3	111	13	2.82418	1	3.53307	1.11	61	10	2	0	0	1	0	0	0	3'utr
C1orf52	1	7	7	1	1	0.845098	0.85	7	7	0	0	1	0	0	0	0	coding
C1orf61	1	23	23	1	1	1.36173	1.36	7	7	0	1	0	0	0	0	0	intron
C1orf86	10	205	11	8.44579	0.81	9.00449	0.93	160	11	0	3	3	3	1	0	0	3'utr
C20orf196	1	7	7	0.714286	0.71	0.69897	0.7	6	6	1	0	0	0	0	0	0	5'utr
C20orf24	2	124	62	1.65	0.83	2.03342	1.02	86	43	1	0	0	0	1	0	0	5'utr
C20orf27	1	8	8	1	1	0.90309	0.9	6	6	1	0	0	0	0	0	0	5'utr
C21orf58	3	33	10	2.65	0.9	2.90849	0.95	24	6	3	0	0	0	0	0	0	5'utr
C21orf59	4	81	17	3.68788	0.93	3.96444	1.07	67	14.5	3	0	0	0	1	0	0	start_codon
C21orf67	2	21	10	1.61818	0.81	1.5563	0.78	18	9	0	0	0	0	0	0	0	lincRNA_exon
C22orf39	1	9	9	1	1	0.954243	0.95	6	6	0	0	1	0	0	0	0	coding
C2CD2L	3	41	14	2.70635	0.89	2.92012	0.9	40	14	1	0	0	1	1	0	0	5'utr
C2orf81	1	8	8	1	1	0.90309	0.9	5	5	0	1	0	0	0	0	0	intron
C2orf88	1	36	36	0.666667	0.67	0.90309	0.9	29	29	0	0	0	0	0	0	0	processed_transcript
C3orf17	1	18	18	0.833333	0.83	0.875061	0.88	15	15	0	0	0	0	1	0	0	start_codon
C3orf38	1	8	8	1	1	0.90309	0.9	5	5	1	0	0	0	0	0	0	5'utr
C3orf58	3	51	12	2.61667	0.87	2.67025	0.9	39	8	2	0	1	0	0	0	0	5'utr
C4orf29	1	23	23	0.869565	0.87	1.30103	1.3	15	15	1	0	0	0	0	0	0	5'utr
C4orf3	1	25	25	0.84	0.84	1.32222	1.32	24	24	0	0	0	0	1	0	0	start_codon
C4orf32	1	10	10	1	1	1	1	9	9	1	0	0	0	0	0	0	5'utr
C4orf46	1	8	8	1	1	0.90309	0.9	6	6	1	0	0	0	0	0	0	5'utr
C5orf24	2	76	38	1.42509	0.71	2.06695	1.03	47	23.5	2	0	0	0	0	0	0	5'utr
C6orf1	1	8	8	0.875	0.88	0.845098	0.85	7	7	1	0	0	0	0	0	0	5'utr
C6orf106	1	14	14	1	1	1.14613	1.15	13	13	0	0	0	0	1	0	0	start_codon
C6orf120	1	10	10	0.9	0.9	0.954243	0.95	7	7	1	0	0	0	0	0	0	5'utr
C6orf47	1	16	16	1	1	1.20412	1.2	13	13	1	0	0	0	0	0	0	5'utr
C6orf48	1	7	7	1	1	0.845098	0.85	7	7	0	0	0	0	0	0	0	5'utr-intron
C6orf62	14	533	39	11.4638	0.82	15.137	1.06	463	35.5	11	0	0	1	1	0	0	3'utr
C6orf89	1	7	7	0.714286	0.71	0.69897	0.7	6	6	1	0	0	0	0	0	0	5'utr
C7orf26	6	201	12	5.15591	0.84	6.18338	1	164	12	2	0	3	1	0	0	0	5'utr
C7orf43	2	23	11	1.81746	0.91	2.01703	1.01	20	10	2	0	0	0	0	0	0	5'utr
C7orf49	1	7	7	0.714286	0.71	0.69897	0.7	7	7	0	0	0	0	0	1	0	stop_codon
C7orf55	1	15	15	0.8	0.8	1.07918	1.08	12	12	0	0	0	0	1	0	0	start_codon
C7orf55-LUC7L2	3	315	31	2.44977	0.8	3.71767	1.26	222	15	1	0	0	1	1	0	0	5'utr
C8orf33	2	36	18	1.71429	0.86	2.34242	1.17	34	17	0	0	1	0	0	0	0	lincRNA_exon-lincRNA_intron
C8orf59	2	29	14	1.67308	0.84	2.15836	1.08	29	14.5	2	0	0	0	0	0	0	5'utr
C9orf114	1	7	7	1	1	0.845098	0.85	3	3	0	0	0	1	0	0	0	3'utr
C9orf142	1	8	8	0.875	0.88	0.845098	0.85	6	6	0	0	1	0	0	0	0	coding
C9orf16	1	63	63	0.952381	0.95	1.77815	1.78	33	33	1	0	0	0	0	0	0	5'utr
C9orf3	1	44	44	0.727273	0.73	0.90309	0.9	8	8	0	1	0	0	0	0	0	intron
C9orf40	2	84	42	1.66215	0.83	2.5092	1.25	69	34.5	2	0	0	0	0	0	0	5'utr
C9orf41	1	14	14	0.857143	0.86	1.07918	1.08	11	11	0	0	1	0	0	0	0	coding
C9orf69	6	50	8	5.52381	0.94	5.28676	0.9	49	8.5	0	0	3	3	0	0	0	3'utr
C9orf78	1	12	12	0.75	0.75	0.954243	0.95	7	7	0	0	1	0	0	0	0	coding
C9orf89	1	7	7	1	1	0.845098	0.85	6	6	1	0	0	0	0	0	0	5'utr
C9orf91	1	13	13	0.923077	0.92	1.07918	1.08	11	11	1	0	0	0	0	0	0	5'utr
CAB39	5	92	9	4.36569	0.88	4.40285	0.85	72	9	3	2	0	0	0	0	0	5'utr
CACNB3	2	38	19	1.92	0.96	2.17464	1.09	29	14.5	1	0	0	0	0	0	0	processed_transcript
CACTIN	1	10	10	1	1	1	1	8	8	0	0	1	0	0	0	0	coding
CACUL1	2	36	18	1.68182	0.84	2.02119	1.01	28	14	1	0	1	0	0	0	0	coding
CACYBP	2	115	57	1.66098	0.83	2.13513	1.07	96	48	2	0	0	0	0	0	0	5'utr
CALM1	3	55	18	2.65444	0.92	2.78958	1.04	43	14	3	0	0	0	0	0	0	5'utr
CALM2	2	43	21	1.87879	0.94	2.4624	1.23	37	18.5	0	0	0	1	1	0	0	3'utr
CALM3	1	129	129	0.844961	0.84	1.19233	1.19	77	77	1	0	0	0	0	0	0	5'utr
CALR	3	164	38	2.35977	0.74	3.76103	1.15	74	29	1	0	1	1	0	0	0	5'utr
CALU	1	9	9	1	1	0.954243	0.95	7	7	1	0	0	0	0	0	0	5'utr
CAMK2D	2	20	10	2	1	2	1	17	8.5	2	0	0	0	0	0	0	5'utr
CAMK2N1	2	31	15	1.67949	0.84	1.61542	0.81	28	14	2	0	0	0	0	0	0	5'utr
CAMK4	2	18	9	1.875	0.94	1.79934	0.9	13	6.5	0	0	1	0	0	0	0	intron-5'utr
CAMLG	2	30	15	1.73333	0.87	1.92428	0.96	26	13	0	0	2	0	0	0	0	coding
CAMSAP1	2	27	13	1.78333	0.89	2.15534	1.08	19	9.5	1	0	1	0	0	0	0	coding
CAMTA1	1	33	33	0.878788	0.88	1.16137	1.16	23	23	0	0	0	0	1	0	0	start_codon
CAND1	2	18	9	1.71429	0.86	1.74036	0.87	17	8.5	2	0	0	0	0	0	0	5'utr
CANT1	3	35	14	2.78571	0.93	3.03822	1.11	28	11	0	1	1	1	0	0	0	3'utr
CANX	3	102	45	2.70444	0.86	3.2802	1.16	55	16	2	0	0	0	0	0	0	5'utr
CAPN15	57	764	11	49.2799	0.86	52.3368	0.9	625	9	2	35	13	6	0	0	0	processed_transcript
CAPN7	1	13	13	1	1	1.11394	1.11	11	11	1	0	0	0	0	0	0	5'utr
CAPNS1	1	17	17	0.823529	0.82	1.14613	1.15	12	12	1	0	0	0	0	0	0	5'utr
CAPRIN1	1	11	11	0.909091	0.91	1	1	10	10	0	0	0	0	0	0	0	5'utr-intron
CAPZA1	1	8	8	1	1	0.90309	0.9	5	5	1	0	0	0	0	0	0	5'utr
CAPZB	1	18	18	0.611111	0.61	1.04139	1.04	14	14	0	0	0	0	0	0	0	processed_transcript
CARD11	1	18	18	0.944444	0.94	1.23045	1.23	11	11	1	0	0	0	0	0	0	5'utr
CARD8	1	7	7	1	1	0.845098	0.85	7	7	0	1	0	0	0	0	0	intron
CARHSP1	1	26	26	0.692308	0.69	0.778151	0.78	20	20	1	0	0	0	0	0	0	5'utr
CARKD	1	8	8	0.875	0.88	0.845098	0.85	7	7	0	0	0	1	0	0	0	3'utr
CASC15	5	138	14	4.322	0.88	5.00459	1	101	12	0	0	0	0	0	0	0	lincRNA_intron
CASC3	1	13	13	0.923077	0.92	1.07918	1.08	13	13	0	0	0	0	1	0	0	start_codon
CASC4	1	33	33	0.774194	0.77	1.07918	1.08	24	24	1	0	0	0	0	0	0	5'utr
CASC5	1	7	7	1	1	0.845098	0.85	6	6	1	0	0	0	0	0	0	5'utr
CASC7	2	17	8	1.8	0.9	1.74819	0.87	16	8	0	0	0	0	0	0	0	lincRNA_exon
CASK	3	30	10	2.625	0.88	2.79934	0.95	22	7	3	0	0	0	0	0	0	5'utr
CASP3	3	42	15	2.31974	0.8	2.70757	0.78	37	15	3	0	0	0	0	0	0	5'utr
CASP8AP2	2	48	24	1.925	0.96	2.47129	1.24	37	18.5	2	0	0	0	0	0	0	5'utr
CASZ1	1	7	7	0.857143	0.86	0.778151	0.78	5	5	0	0	0	1	0	0	0	3'utr
CBFA2T3	5	96	18	3.8043	0.78	3.76042	0.78	59	12	1	4	0	0	0	0	0	intron
CBFB	5	336	49	4.18093	0.85	5.37489	1.11	194	35	2	0	2	0	1	0	0	5'utr
CBL	4	49	8	3.44389	0.88	3.22167	0.85	38	7	4	0	0	0	0	0	0	5'utr
CBWD2	1	14	14	1	1	1.14613	1.15	13	13	1	0	0	0	0	0	0	5'utr
CBWD3	1	25	25	0.76	0.76	0.801632	0.8	20	20	0	0	0	0	1	0	0	start_codon
CBWD5	2	35	17	1.87319	0.94	2.38382	1.19	26	13	1	0	0	0	1	0	0	5'utr
CBWD7	2	32	16	1.74902	0.87	1.989	0.99	22	11	1	0	1	0	0	0	0	coding
CBX1	4	60	15	3.70274	0.91	4.08493	1.09	42	11.5	3	0	1	0	0	0	0	coding
CBX2	2	24	12	1.65546	0.83	1.60206	0.8	20	10	1	0	0	1	0	0	0	5'utr
CBX3	5	245	62	4.4338	0.9	5.64366	1.11	190	43	0	4	0	0	0	0	0	5'utr-intron
CBX4	3	111	9	2.30292	0.75	2.35393	0.81	85	8	1	0	0	2	0	0	0	3'utr
CBX5	2	64	32	1.75188	0.88	2.18469	1.09	58	29	0	0	0	1	0	0	0	3'utr
CBX6	16	318	12	13.86	0.85	15.8696	0.98	260	12.5	0	0	3	12	1	0	0	3'utr
CCAR2	1	23	23	0.826087	0.83	0.801632	0.8	20	20	0	0	0	0	0	0	0	5'utr-intron
CCBL2	2	42	21	1.50588	0.75	2.07918	1.04	31	15.5	2	0	0	0	0	0	0	5'utr
CCDC101	1	8	8	1	1	0.90309	0.9	5	5	1	0	0	0	0	0	0	5'utr
CCDC107	1	22	22	0.863636	0.86	1.27875	1.28	19	19	0	0	0	0	1	0	0	start_codon
CCDC117	3	50	13	2.24701	0.77	2.46835	0.85	42	11	1	0	0	0	1	1	0	5'utr
CCDC12	1	10	10	0.8	0.8	0.90309	0.9	7	7	0	0	1	0	0	0	0	coding
CCDC120	1	7	7	0.857143	0.86	0.778151	0.78	6	6	1	0	0	0	0	0	0	5'utr
CCDC124	1	9	9	1	1	0.954243	0.95	8	8	0	0	1	0	0	0	0	coding
CCDC126	1	13	13	1	1	1.11394	1.11	4	4	1	0	0	0	0	0	0	5'utr
CCDC18	1	9	9	0.888889	0.89	0.60206	0.6	7	7	1	0	0	0	0	0	0	5'utr
CCDC23	1	13	13	0.769231	0.77	1	1	11	11	1	0	0	0	0	0	0	5'utr
CCDC34	1	12	12	0.666667	0.67	0.60206	0.6	11	11	0	0	0	0	1	0	0	start_codon
CCDC43	1	10	10	1	1	1	1	10	10	0	0	1	0	0	0	0	coding
CCDC47	1	11	11	1	1	1.04139	1.04	10	10	1	0	0	0	0	0	0	5'utr
CCDC71L	3	46	16	2.86111	0.94	3.47596	1.2	32	11	1	0	2	0	0	0	0	coding
CCDC85B	1	7	7	0.857143	0.86	0.778151	0.78	7	7	0	0	1	0	0	0	0	coding
CCDC86	1	13	13	1	1	1.11394	1.11	12	12	0	0	1	0	0	0	0	coding
CCDC90B	1	20	20	0.95	0.95	0.977724	0.98	17	17	0	0	0	0	1	0	0	start_codon
CCDC92	1	13	13	1	1	1.11394	1.11	11	11	1	0	0	0	0	0	0	5'utr
CCDC97	1	17	17	0.823529	0.82	0.669007	0.67	11	11	1	0	0	0	0	0	0	5'utr
CCM2	2	28	14	1.57143	0.79	1.65321	0.83	20	10	1	0	0	1	0	0	0	5'utr
CCNA2	4	288	13	3.72172	0.92	4.28416	1.09	178	8	2	0	1	0	1	0	0	coding
CCNB1	1	115	115	0.886957	0.89	1.30963	1.31	94	94	0	0	0	0	1	0	0	start_codon
CCNB2	2	26	13	1.92857	0.96	1.89209	0.95	23	11.5	2	0	0	0	0	0	0	5'utr
CCNC	1	17	17	0.823529	0.82	0.845098	0.85	16	16	1	0	0	0	0	0	0	5'utr
CCND3	2	25	12	1.875	0.94	1.74819	0.87	15	7.5	2	0	0	0	0	0	0	5'utr
CCNG1	1	10	10	1	1	1	1	10	10	1	0	0	0	0	0	0	5'utr
CCNG2	3	103	32	2.46189	0.8	3.25334	0.9	80	18	2	0	0	0	0	0	0	5'utr
CCNI	5	175	34	4.16303	0.86	5.43595	1.1	132	20	4	0	1	0	0	0	0	coding
CCNJ	1	9	9	0.888889	0.89	0.90309	0.9	8	8	1	0	0	0	0	0	0	5'utr
CCNJL	1	11	11	0.909091	0.91	0.69897	0.7	10	10	1	0	0	0	0	0	0	5'utr
CCNT1	1	11	11	1	1	1.04139	1.04	11	11	0	0	0	0	1	0	0	start_codon
CCNY	3	38	10	2.41988	0.8	2.95231	0.9	34	8	1	2	0	0	0	0	0	intron
CCNYL1	1	21	21	0.904762	0.9	1.27875	1.28	7	7	1	0	0	0	0	0	0	5'utr
CCSAP	1	9	9	1	1	0.954243	0.95	9	9	0	0	0	0	0	0	0	intron-5'utr
CCSER2	1	47	47	0.87234	0.87	1.13566	1.14	40	40	1	0	0	0	0	0	0	5'utr
CCT3	1	12	12	1	1	1.07918	1.08	10	10	0	0	0	0	1	0	0	start_codon
CCT4	3	52	14	2.66022	0.88	2.72263	0.87	42	12	2	0	1	0	0	0	0	coding
CCT5	1	17	17	1	1	1.23045	1.23	13	13	0	0	0	0	1	0	0	start_codon
CCT6A	1	13	13	0.846154	0.85	0.740363	0.74	10	10	1	0	0	0	0	0	0	5'utr
CCT7	1	8	8	0.625	0.63	0.69897	0.7	6	6	1	0	0	0	0	0	0	5'utr
CCZ1	1	12	12	0.75	0.75	0.653213	0.65	7	7	0	0	0	0	1	0	0	start_codon
CCZ1B	1	8	8	1	1	0.90309	0.9	6	6	0	0	1	0	0	0	0	coding
CD164	3	57	14	2.13929	0.66	2.66276	0.88	56	14	1	0	1	0	1	0	0	coding
CD1E	1	15	15	0.866667	0.87	0.812913	0.81	14	14	1	0	0	0	0	0	0	5'utr
CD247	3	34	12	2.55714	0.86	2.59106	0.81	27	9	2	0	0	0	1	0	0	start_codon
CD27-AS1	1	15	15	0.8	0.8	0.60206	0.6	15	15	0	0	0	0	0	0	0	retained_intron
CD28	5	61	11	3.53838	0.73	4.06625	0.85	57	10	1	0	2	1	1	0	0	5'utr
CD2AP	2	28	14	1.71429	0.86	2.03342	1.02	26	13	2	0	0	0	0	0	0	5'utr
CD2BP2	4	55	13	3.30952	0.8	3.81158	0.93	43	11	1	0	0	3	0	0	0	3'utr
CD320	1	10	10	0.9	0.9	0.954243	0.95	8	8	0	0	1	0	0	0	0	coding
CD3D	4	350	86	3.42828	0.87	4.36484	1.14	230	54	0	0	1	0	1	1	0	stop_codon
CD3E	2	29	14	1.83333	0.92	2.23045	1.12	28	14	0	0	1	0	1	0	0	start_codon
CD3G	1	19	19	0.789474	0.79	1.17609	1.18	17	17	1	0	0	0	0	0	0	5'utr
CD46	2	16	8	1.52381	0.76	1.5563	0.78	15	7.5	1	0	0	0	1	0	0	5'utr
CD47	2	57	28	1.75192	0.88	2.77815	1.39	45	22.5	1	0	1	0	0	0	0	coding
CD48	1	7	7	0.571429	0.57	0.60206	0.6	7	7	0	0	0	0	1	0	0	start_codon
CD5	1	7	7	1	1	0.845098	0.85	6	6	1	0	0	0	0	0	0	5'utr
CD53	1	29	29	0.862069	0.86	0.79588	0.8	28	28	1	0	0	0	0	0	0	5'utr
CD55	1	7	7	0.857143	0.86	0.778151	0.78	7	7	1	0	0	0	0	0	0	5'utr
CD59	2	21	10	1.83333	0.92	1.95424	0.98	19	9.5	1	0	0	0	1	0	0	start_codon
CD6	2	63	31	1.67857	0.84	2.42488	1.21	29	14.5	1	0	1	0	0	0	0	5'utr
CD63	1	8	8	1	1	0.90309	0.9	5	5	0	0	0	0	1	0	0	start_codon
CD69	5	94	11	4.50522	0.89	5.09258	1	91	10	0	0	1	3	1	0	0	3'utr
CD7	1	14	14	0.714286	0.71	1	1	10	10	1	0	0	0	0	0	0	5'utr
CD81	2	19	9	1.52381	0.76	1.68124	0.84	16	8	1	0	0	1	0	0	0	5'utr
CD82	10	430	22	8.22634	0.83	10.241	1	330	18.5	2	0	1	5	1	0	0	5'utr
CD83	1	13	13	1	1	1.11394	1.11	13	13	0	0	0	0	1	0	0	start_codon
CD99	2	59	29	1.65294	0.83	1.80919	0.9	44	22	1	0	0	0	1	0	0	5'utr
CDC16	1	7	7	1	1	0.845098	0.85	6	6	1	0	0	0	0	0	0	5'utr
CDC20	3	44	9	2.62393	0.89	3.1486	0.9	35	9	0	0	1	0	1	0	0	5'utr-intron
CDC25A	5	182	31	3.83671	0.81	4.5563	1	129	22	4	0	0	0	1	0	0	start_codon
CDC25B	1	12	12	0.833333	0.83	0.69897	0.7	11	11	0	0	0	1	0	0	0	3'utr
CDC26	2	23	11	1.84615	0.92	1.99564	1	20	10	2	0	0	0	0	0	0	5'utr
CDC34	4	80	19	3.56387	0.91	3.76716	0.85	50	12.5	1	0	1	1	1	0	0	5'utr
CDC37L1	1	11	11	0.909091	0.91	1	1	9	9	1	0	0	0	0	0	0	5'utr
CDC42SE1	3	72	13	2.40466	0.81	2.79727	1.04	61	12	3	0	0	0	0	0	0	5'utr
CDC42SE2	1	34	34	0.794118	0.79	1.13033	1.13	24	24	1	0	0	0	0	0	0	5'utr
CDC5L	1	11	11	0.818182	0.82	0.653213	0.65	11	11	0	0	0	0	1	0	0	start_codon
CDC6	1	7	7	1	1	0.845098	0.85	7	7	1	0	0	0	0	0	0	5'utr
CDCA2	4	116	33	3.3077	0.81	4.34092	1.02	86	23	4	0	0	0	0	0	0	5'utr
CDCA3	1	7	7	0.857143	0.86	0.778151	0.78	7	7	1	0	0	0	0	0	0	5'utr
CDCA4	4	65	10	3.86842	1	3.88213	1	52	7.5	0	0	2	0	1	0	0	coding
CDCA5	13	259	13	11.04	0.85	13.1045	1	210	12	1	1	4	6	0	0	0	3'utr
CDCA7	1	7	7	0.857143	0.86	0.778151	0.78	7	7	1	0	0	0	0	0	0	5'utr
CDCA8	1	74	74	0.959459	0.96	1.55023	1.55	21	21	1	0	0	0	0	0	0	5'utr
CDIPT	5	171	25	4.26152	0.86	5.78179	1	127	18	2	0	0	2	0	0	0	3'utr
CDK1	1	79	79	0.871795	0.87	1.13354	1.13	28	28	1	0	0	0	0	0	0	5'utr
CDK11B	2	23	11	1.46212	0.73	1.81954	0.91	20	10	1	1	0	0	0	0	0	5'utr
CDK12	1	7	7	0.571429	0.57	0.60206	0.6	6	6	1	0	0	0	0	0	0	5'utr
CDK13	9	237	15	7.07382	0.84	8.87579	0.95	184	13	3	0	5	0	1	0	0	5'utr
CDK16	1	11	11	0.818182	0.82	0.954243	0.95	9	9	1	0	0	0	0	0	0	5'utr
CDK17	5	167	31	4.3901	0.9	5.8637	1.23	108	18	5	0	0	0	0	0	0	5'utr
CDK19	1	7	7	0.857143	0.86	0.778151	0.78	6	6	0	1	0	0	0	0	0	intron
CDK2	3	101	33	2.61003	0.85	3.18089	0.92	86	26	2	0	0	1	0	0	0	5'utr
CDK2AP1	2	126	63	1.49206	0.75	2.74036	1.37	77	38.5	2	0	0	0	0	0	0	5'utr
CDK2AP2	6	182	25	5.30238	0.86	6.16997	0.99	114	8	4	0	1	0	0	0	0	coding
CDK4	2	116	58	1.65273	0.83	2.26007	1.13	75	37.5	1	0	1	0	0	0	0	coding
CDK5RAP2	1	9	9	0.666667	0.67	0.778151	0.78	9	9	1	0	0	0	0	0	0	5'utr
CDK5RAP3	1	7	7	0.714286	0.71	0.69897	0.7	7	7	1	0	0	0	0	0	0	5'utr
CDK6	25	1319	15	22.6155	0.9	26.1639	1	695	13	4	2	2	16	1	0	0	3'utr
CDK7	1	24	24	0.958333	0.96	1.36173	1.36	21	21	0	0	0	0	1	0	0	start_codon
CDK8	3	83	10	2.68889	0.89	3.35025	1	64	10	3	0	0	0	0	0	0	5'utr
CDK9	1	7	7	0.857143	0.86	0.778151	0.78	4	4	0	0	0	1	0	0	0	3'utr
CDKN1B	4	447	11	3.36571	0.83	4.17293	1	295	9	1	0	1	1	1	0	0	5'utr
CDKN2AIP	1	13	13	1	1	1.07918	1.08	8	8	1	0	0	0	0	0	0	5'utr
CDKN2AIPNL	1	38	38	0.868421	0.87	1.04139	1.04	26	26	0	0	0	0	1	0	0	start_codon
CDKN2C	7	448	33	6.28523	0.88	7.89135	1.11	319	24	6	0	0	0	0	0	0	5'utr
CDON	1	9	9	1	1	0.954243	0.95	6	6	0	1	0	0	0	0	0	intron
CDPF1	2	16	8	1.60317	0.8	1.30103	0.65	16	8	0	0	0	0	0	0	0	processed_transcript
CDR2	2	114	57	1.82696	0.91	2.89873	1.45	74	37	2	0	0	0	0	0	0	5'utr
CDT1	3	38	11	2.58824	1	2.74036	1	38	11	0	0	0	2	1	0	0	start_codon
CDV3	3	88	39	2.27329	0.78	2.78161	0.85	66	27	3	0	0	0	0	0	0	5'utr
CEBPB	9	154	11	7.53234	0.9	8.04341	0.95	142	10	0	0	7	1	0	1	0	coding
CEBPG	2	29	14	1.62987	0.81	1.70757	0.85	25	12.5	1	0	0	0	0	1	0	5'utr
CEBPZ	1	7	7	1	1	0.845098	0.85	5	5	0	0	1	0	0	0	0	coding
CECR5	4	121	13	3.5741	0.88	3.9696	0.99	84	10.5	0	1	1	1	1	0	0	3'utr
CELF1	2	29	14	1.85	0.93	2.18469	1.09	26	13	1	0	0	1	0	0	0	3'utr
CELF2	1	7	7	0.857143	0.86	0.778151	0.78	6	6	1	0	0	0	0	0	0	5'utr
CENPA	4	181	39	3.21848	0.82	4.03822	1.01	135	30	1	0	0	1	1	1	0	5'utr
CENPB	18	634	19	14.3896	0.83	17.3	0.92	433	16	2	0	11	5	0	0	0	3'utr
CENPBD1P1	2	38	19	1.85714	0.93	2.26951	1.13	28	14	0	0	0	0	0	0	0	processed_transcript
CENPF	2	32	16	1.85714	0.93	1.99564	1	25	12.5	2	0	0	0	0	0	0	5'utr
CENPL	1	32	32	0.78125	0.78	1.09691	1.1	28	28	0	0	0	0	0	0	0	processed_transcript
CENPM	1	12	12	0.75	0.75	0.954243	0.95	12	12	0	1	0	0	0	0	0	intron
CENPO	3	41	12	2.13961	0.75	2.51055	0.65	34	12	0	0	2	0	1	0	0	start_codon
CENPV	1	13	13	1	1	1.11394	1.11	6	6	0	0	1	0	0	0	0	coding
CENPW	1	59	59	0.830508	0.83	1.6902	1.69	49	49	0	0	0	0	1	0	0	start_codon
CEP104	1	7	7	1	1	0.845098	0.85	7	7	1	0	0	0	0	0	0	5'utr
CEP120	1	7	7	1	1	0.845098	0.85	7	7	1	0	0	0	0	0	0	5'utr
CEP170	1	7	7	0.714286	0.71	0.69897	0.7	5	5	1	0	0	0	0	0	0	5'utr
CEP19	2	26	13	1.84211	0.92	1.5721	0.79	20	10	2	0	0	0	0	0	0	5'utr
CEP350	1	19	19	0.789474	0.79	0.69897	0.7	15	15	1	0	0	0	0	0	0	5'utr
CEP44	1	10	10	0.8	0.8	0.60206	0.6	9	9	0	0	0	0	0	0	0	5'utr-intron
CEP55	4	67	16	3.51639	0.86	3.6902	0.88	53	13	3	0	1	0	0	0	0	5'utr
CEP57	1	8	8	1	1	0.90309	0.9	7	7	1	0	0	0	0	0	0	5'utr
CEP72	8	91	8	7.18147	0.88	6.65834	0.85	76	7	0	5	1	0	1	0	0	start_codon
CEP78	2	15	7	2	1	1.74819	0.87	12	6	2	0	0	0	0	0	0	5'utr
CEP83	2	17	8	1.47143	0.74	1.5563	0.78	15	7.5	2	0	0	0	0	0	0	5'utr
CEP85L	1	8	8	0.875	0.88	0.845098	0.85	7	7	1	0	0	0	0	0	0	5'utr
CEP95	1	11	11	0.909091	0.91	1	1	10	10	1	0	0	0	0	0	0	5'utr
CERK	1	9	9	0.888889	0.89	0.60206	0.6	7	7	0	0	1	0	0	0	0	coding
CERS2	3	56	13	2.45944	0.9	3.35564	1.08	41	10	2	1	0	0	0	0	0	intron
CERS6	1	37	37	0.810811	0.81	1.47712	1.48	27	27	1	0	0	0	0	0	0	5'utr
CES2	1	11	11	0.818182	0.82	0.954243	0.95	9	9	1	0	0	0	0	0	0	5'utr
CETN3	1	9	9	1	1	0.954243	0.95	7	7	1	0	0	0	0	0	0	5'utr
CFAP20	2	160	80	1.84817	0.92	3.07436	1.54	100	50	1	0	0	0	1	0	0	start_codon
CFAP97	1	12	12	1	1	1.07918	1.08	11	11	1	0	0	0	0	0	0	5'utr
CFL1	6	323	17	4.78658	0.81	5.32443	0.84	203	15.5	2	0	0	3	1	0	0	3'utr
CFLAR	3	41	10	2.30595	0.79	2.57978	0.9	37	8	2	1	0	0	0	0	0	5'utr
CGGBP1	4	59	15	3.21433	0.8	3.4484	0.93	54	14.5	2	2	0	0	0	0	0	intron
CH17-118O6.3	1	46	46	0.76087	0.76	0.765917	0.77	23	23	0	0	0	0	0	0	0	antisense
CH17-472G23.4	1	7	7	0.857143	0.86	0.778151	0.78	5	5	0	0	0	0	0	0	0	unprocessed_pseudogene
CH507-42P11.1	1	22	22	0.818182	0.82	0.653213	0.65	18	18	0	0	0	0	0	0	0	processed_pseudogene
CH507-513H4.1	6	492	35	4.0221	0.64	6.00296	0.96	142	16	0	0	0	0	0	0	0	lincRNA_intron
CH507-528H12.1	6	864	53	2.67833	0.44	5.04424	0.81	170	24.5	0	0	0	0	0	0	0	lincRNA_intron
CHAC1	1	8	8	1	1	0.90309	0.9	8	8	0	0	0	1	0	0	0	3'utr
CHAF1A	1	11	11	1	1	1.04139	1.04	8	8	0	0	0	0	1	0	0	start_codon
CHAMP1	1	46	46	0.782609	0.78	0.778151	0.78	29	29	0	0	0	0	0	0	0	5'utr-intron
CHCHD1	1	18	18	0.777778	0.78	0.845098	0.85	16	16	0	0	0	0	1	0	0	start_codon
CHCHD2	3	35	9	2.89474	1	2.72876	0.93	24	8	0	0	2	1	0	0	0	3'utr
CHCHD2P6	1	65	65	0.846154	0.85	1.26324	1.26	32	32	0	0	0	0	0	0	0	processed_pseudogene
CHCHD2P9	1	13	13	0.846154	0.85	0.740363	0.74	8	8	0	0	0	0	0	0	0	processed_pseudogene
CHCHD3	2	18	9	2	1	1.90309	0.95	15	7.5	1	0	0	0	1	0	0	start_codon
CHCHD6	1	11	11	1	1	1.04139	1.04	9	9	1	0	0	0	0	0	0	5'utr
CHD1	2	51	25	1.60317	0.8	1.77815	0.89	44	22	2	0	0	0	0	0	0	5'utr
CHD2	1	8	8	0.875	0.88	0.845098	0.85	7	7	1	0	0	0	0	0	0	5'utr
CHD4	4	86	19	3.33577	0.82	4.42431	1.05	62	15.5	1	0	0	2	1	0	0	3'utr
CHERP	1	15	15	0.866667	0.87	0.812913	0.81	15	15	0	0	0	0	1	0	0	start_codon
CHI3L2	1	11	11	0.727273	0.73	0.60206	0.6	10	10	0	0	1	0	0	0	0	coding
CHIC2	4	73	14	3.46531	0.87	3.39041	0.83	62	13	4	0	0	0	0	0	0	5'utr
CHMP1A	3	27	10	2.9	1	2.79934	0.95	24	9	0	0	1	2	0	0	0	3'utr
CHMP2A	1	8	8	0.875	0.88	0.845098	0.85	8	8	0	0	1	0	0	0	0	coding
CHMP2B	2	118	59	1.70643	0.85	2.26688	1.13	82	41	2	0	0	0	0	0	0	5'utr
CHMP4B	1	11	11	0.909091	0.91	1	1	10	10	0	0	1	0	0	0	0	coding
CHMP5	1	9	9	1	1	0.954243	0.95	9	9	0	0	0	0	1	0	0	start_codon
CHMP6	1	8	8	0.875	0.88	0.845098	0.85	6	6	0	0	0	1	0	0	0	3'utr
CHMP7	2	16	8	1.875	0.94	1.74819	0.87	15	7.5	1	0	0	1	0	0	0	5'utr
CHP1	1	12	12	1	1	1.07918	1.08	12	12	0	0	0	0	1	0	0	start_codon
CHPF2	6	75	13	5.3047	0.92	5.92249	1	56	9	6	0	0	0	0	0	0	5'utr
CHRAC1	1	11	11	0.909091	0.91	1	1	10	10	1	0	0	0	0	0	0	5'utr
CHRNB1	1	13	13	0.769231	0.77	0.69897	0.7	12	12	0	0	0	1	0	0	0	3'utr
CHST10	1	14	14	0.857143	0.86	0.778151	0.78	12	12	1	0	0	0	0	0	0	5'utr
CHST11	2	236	118	1.72088	0.86	2.36975	1.18	124	62	2	0	0	0	0	0	0	5'utr
CHST2	20	1933	42	17.3867	0.85	24.0592	1.15	1222	27.5	6	0	11	1	1	1	0	5'utr
CHSY1	8	771	89	6.85435	0.86	10.4968	1.29	519	46	4	0	2	0	1	0	0	coding
CHTF8	8	137	13	6.94148	0.88	8.19525	0.87	115	13	1	0	1	6	0	0	0	3'utr
CHTF8P1	1	7	7	1	1	0.845098	0.85	7	7	0	0	0	0	0	0	0	processed_pseudogene
CHTOP	5	125	20	4.27785	0.86	5.57066	0.9	105	20	2	1	2	0	0	0	0	5'utr
CHURC1-FNTB	1	25	25	0.72	0.72	1.25527	1.26	21	21	0	0	0	0	1	0	0	start_codon
CIAO1	3	91	17	2.7489	0.93	3.48259	1.15	55	13	0	0	1	0	1	0	0	start_codon
CIB1	2	33	16	1.68261	0.84	1.90849	0.95	26	13	0	0	1	0	1	0	0	coding
CIC	7	174	12	5.78139	0.86	7.53156	0.9	119	11	0	0	2	1	0	0	0	processed_transcript
CIDECP	1	14	14	0.857143	0.86	0.778151	0.78	9	9	0	0	0	0	0	0	0	processed_transcript
CINP	1	7	7	0.714286	0.71	0.69897	0.7	7	7	0	0	1	0	0	0	0	coding
CIRBP	3	41	9	2.88	1	3.14176	0.95	38	9	1	0	0	1	0	0	0	5'utr
CISD2	1	10	10	0.9	0.9	0.954243	0.95	10	10	0	0	0	0	1	0	0	start_codon
CISD3	1	7	7	1	1	0.845098	0.85	7	7	0	0	0	0	1	0	0	start_codon
CKAP2L	1	8	8	0.75	0.75	0.778151	0.78	8	8	0	0	0	0	1	0	0	start_codon
CKLF	3	50	11	2.42038	0.79	2.617	0.95	45	9	2	0	0	0	1	0	0	5'utr
CKLF-CMTM1	2	21	10	1.71818	0.86	1.30643	0.65	18	9	0	2	0	0	0	0	0	intron
CKS1B	1	31	31	0.806452	0.81	1.39794	1.4	25	25	1	0	0	0	0	0	0	5'utr
CKS2	1	249	249	0.823293	0.82	1.10763	1.11	182	182	0	0	0	0	1	0	0	start_codon
CLCN3	1	11	11	1	1	1.04139	1.04	4	4	0	0	0	1	0	0	0	3'utr
CLDN15	2	16	8	1.625	0.81	1.62325	0.81	15	7.5	0	0	2	0	0	0	0	coding
CLDND1	1	9	9	0.888889	0.89	0.60206	0.6	8	8	0	0	0	0	1	0	0	start_codon
CLEC16A	1	17	17	1	1	1.23045	1.23	6	6	1	0	0	0	0	0	0	5'utr
CLEC2B	2	110	55	1.38384	0.69	1.5563	0.78	95	47.5	0	0	1	0	0	0	0	coding
CLIC1	4	694	134	3.02277	0.75	4.34592	1.1	493	103	0	0	0	1	1	0	0	3'utr
CLINT1	3	47	16	2.39457	0.82	2.5977	0.9	41	15	1	0	0	0	1	0	0	start_codon
CLIP3	2	18	9	1.75	0.88	1.77815	0.89	16	8	2	0	0	0	0	0	0	5'utr
CLK2	2	65	32	1.7996	0.9	2.30963	1.15	32	16	2	0	0	0	0	0	0	5'utr
CLN3	3	40	13	2.26471	0.76	2.92686	1.11	36	10	0	2	0	0	1	0	0	start_codon
CLN6	2	19	9	1.60714	0.8	1.73239	0.87	19	9.5	1	0	0	1	0	0	0	3'utr
CLNS1A	1	12	12	0.75	0.75	0.954243	0.95	10	10	0	0	1	0	0	0	0	coding
CLPP	4	39	8	3.64762	0.97	3.70243	0.93	34	7.5	0	0	1	1	1	0	0	start_codon
CLPTM1L	2	26	13	1.55	0.78	1.68124	0.84	26	13	2	0	0	0	0	0	0	5'utr
CLSTN1	1	28	28	0.857143	0.86	1.07918	1.08	21	21	0	0	1	0	0	0	0	coding
CLSTN3	2	22	11	1.91667	0.96	2.04139	1.02	21	10.5	2	0	0	0	0	0	0	5'utr
CLTA	4	67	9	3.60952	0.9	3.88536	0.9	57	7.5	1	0	2	0	1	0	0	5'utr
CLTB	6	139	20	5.20501	0.85	6.32033	1.02	97	14.5	2	0	2	1	1	0	0	3'utr
CLTC	1	32	32	0.90625	0.91	1.16137	1.16	30	30	1	0	0	0	0	0	0	5'utr
CLUH	5	59	8	3.89464	0.81	4.12254	0.78	46	7	0	2	0	3	0	0	0	3'utr
CMAS	1	10	10	1	1	1	1	10	10	0	0	0	0	1	0	0	start_codon
CMC2	2	53	26	1.77019	0.89	2.4014	1.2	36	18	1	0	0	1	0	0	0	3'utr
CMIP	1	13	13	0.692308	0.69	0.954243	0.95	11	11	1	0	0	0	0	0	0	5'utr
CMPK1	1	7	7	0.714286	0.71	0.69897	0.7	6	6	1	0	0	0	0	0	0	5'utr
CMTM1	1	8	8	0.875	0.88	0.845098	0.85	7	7	1	0	0	0	0	0	0	5'utr
CMTM3	6	98	16	5.03661	0.85	5.35736	0.92	81	10.5	0	0	1	3	0	1	0	intron-5'utr
CMTM6	1	27	27	0.925926	0.93	0.920819	0.92	17	17	0	0	0	0	1	0	0	start_codon
CMTR2	1	23	23	0.782609	0.78	0.954243	0.95	21	21	0	0	0	0	0	0	0	5'utr-intron
CNBP	2	100	50	1.84783	0.92	2.19312	1.1	67	33.5	1	0	1	0	0	0	0	coding
CNDP2	3	44	13	2.46255	0.79	2.90849	1.08	40	12	0	2	0	0	1	0	0	intron
CNIH4	2	81	40	1.77932	0.89	2.3927	1.2	44	22	0	1	0	0	1	0	0	start_codon
CNN2	2	22	11	1.72727	0.86	1.64345	0.82	15	7.5	0	0	2	0	0	0	0	coding
CNNM3	1	8	8	0.75	0.75	0.778151	0.78	8	8	0	0	1	0	0	0	0	coding
CNOT1	1	32	32	0.90625	0.91	1.4624	1.46	16	16	1	0	0	0	0	0	0	5'utr
CNOT11	2	107	53	1.62429	0.81	2.18089	1.09	59	29.5	0	0	1	0	1	0	0	start_codon
CNOT3	2	20	10	2	1	1.99564	1	16	8	2	0	0	0	0	0	0	5'utr
CNOT4	1	7	7	0.857143	0.86	0.778151	0.78	5	5	1	0	0	0	0	0	0	5'utr
CNOT6	1	14	14	0.642857	0.64	0.653213	0.65	13	13	0	0	0	0	0	0	0	intron-5'utr
CNOT7	1	15	15	0.8	0.8	0.778151	0.78	14	14	1	0	0	0	0	0	0	5'utr
CNOT8	4	92	16	3.62665	0.9	4.10958	0.99	65	14.5	1	0	0	0	0	0	0	5'utr-intron
CNPPD1	1	9	9	0.888889	0.89	0.90309	0.9	6	6	0	0	0	1	0	0	0	3'utr
CNPY2	1	49	49	0.795918	0.8	0.745967	0.75	43	43	0	0	0	0	0	0	0	5'utr-intron
CNPY3	4	77	21	3.31944	0.83	4.34916	1.09	48	11	3	0	1	0	0	0	0	5'utr
CNST	1	22	22	0.863636	0.86	0.801632	0.8	17	17	0	0	0	0	0	0	0	processed_transcript
CNTROB	4	101	21	3.40824	0.85	4.18256	1.01	84	14.5	4	0	0	0	0	0	0	5'utr
COA4	1	10	10	0.8	0.8	0.60206	0.6	6	6	1	0	0	0	0	0	0	5'utr
COA6	5	51	11	4.08192	0.82	4.51055	0.95	46	10	3	1	0	1	0	0	0	5'utr
COL4A3BP	4	48	11	3.13889	0.79	3.21748	0.74	41	9.5	1	0	3	0	0	0	0	coding
COMT	2	56	28	1.77551	0.89	2.43136	1.22	38	19	2	0	0	0	0	0	0	5'utr
COPB1	2	30	15	1.75	0.88	1.69897	0.85	26	13	1	0	0	0	0	0	0	5'utr-intron
COPB2	2	19	9	1.65909	0.83	1.77815	0.89	16	8	1	0	0	0	1	0	0	start_codon
COPE	3	41	14	2.07425	0.84	2.44716	0.85	35	11	1	0	1	0	1	0	0	coding
COPS3	1	39	39	0.615385	0.62	1.07918	1.08	27	27	1	0	0	0	0	0	0	5'utr
COPS7A	1	7	7	1	1	0.845098	0.85	6	6	1	0	0	0	0	0	0	5'utr
COPS7B	1	25	25	0.92	0.92	1.0607	1.06	19	19	1	0	0	0	0	0	0	5'utr
COPS8	1	9	9	0.777778	0.78	0.845098	0.85	8	8	1	0	0	0	0	0	0	5'utr
COQ2	3	39	8	2.63095	0.92	2.64345	0.9	25	6	0	0	3	0	0	0	0	coding
COQ4	1	11	11	0.818182	0.82	0.954243	0.95	11	11	0	0	1	0	0	0	0	coding
COQ5	1	18	18	0.944444	0.94	1.23045	1.23	15	15	0	0	1	0	0	0	0	coding
COQ7	1	9	9	1	1	0.954243	0.95	7	7	0	0	0	0	1	0	0	start_codon
COQ9	1	10	10	0.9	0.9	0.653213	0.65	7	7	0	0	1	0	0	0	0	coding
CORO1A	8	185	9	6.89503	0.88	7.28348	0.91	144	7.5	1	2	4	0	1	0	0	5'utr
CORO7-PAM16	1	8	8	1	1	0.90309	0.9	8	8	0	0	1	0	0	0	0	coding
COTL1	1	46	46	0.76087	0.76	1.06695	1.07	33	33	0	0	0	0	1	0	0	start_codon
COX10-AS1	1	16	16	0.9375	0.94	0.875061	0.88	14	14	0	0	0	0	0	0	0	antisense
COX11	2	27	13	1.69231	0.85	1.79934	0.9	22	11	0	0	1	0	1	0	0	coding
COX16	1	31	31	0.903226	0.9	1.14613	1.15	30	30	0	0	0	0	1	0	0	start_codon
COX17	2	17	8	2	1	1.8451	0.92	15	7.5	0	0	1	1	0	0	0	3'utr
COX18	1	10	10	0.8	0.8	0.90309	0.9	8	8	0	0	1	0	0	0	0	coding
COX20	1	7	7	1	1	0.845098	0.85	7	7	0	0	0	0	1	0	0	start_codon
COX4I1	1	86	86	0.883721	0.88	1.27875	1.28	61	61	0	0	0	0	0	0	0	processed_transcript
COX5A	2	44	22	1.63636	0.82	2.08458	1.04	36	18	0	0	1	0	1	0	0	coding
COX5B	1	26	26	0.884615	0.88	1.0607	1.06	19	19	0	0	1	0	0	0	0	coding
COX6A1	1	11	11	0.909091	0.91	0.69897	0.7	8	8	0	0	1	0	0	0	0	coding
COX6B1	1	30	30	0.833333	0.83	0.920819	0.92	29	29	1	0	0	0	0	0	0	5'utr
COX6C	2	26	13	1.69231	0.85	2.08279	1.04	20	10	1	0	0	0	1	0	0	start_codon
COX7A2	2	53	26	1.72093	0.86	2.01424	1.01	46	23	0	0	1	1	0	0	0	3'utr
COX7B	1	23	23	0.73913	0.74	0.929419	0.93	21	21	0	0	0	0	1	0	0	start_codon
COX7C	2	208	104	1.58492	0.79	2.54672	1.27	102	51	1	0	0	0	1	0	0	5'utr
COX8A	2	103	51	1.72931	0.86	1.89763	0.95	81	40.5	0	0	1	0	1	0	0	start_codon
CPEB1	1	8	8	1	1	0.90309	0.9	8	8	0	0	0	0	0	0	0	processed_transcript
CPNE4	1	25	25	0.72	0.72	0.954243	0.95	13	13	0	1	0	0	0	0	0	intron
CPOX	2	37	18	1.86667	0.93	1.5611	0.78	28	14	1	0	1	0	0	0	0	coding
CPSF2	2	50	25	1.88889	0.94	2.65128	1.33	35	17.5	2	0	0	0	0	0	0	5'utr
CPSF4	1	32	32	0.75	0.75	0.60206	0.6	25	25	1	0	0	0	0	0	0	5'utr
CPSF7	3	39	10	2.62078	0.86	2.71012	0.78	37	10	0	0	1	1	0	0	0	3'utr
CPT2	2	17	8	1.7	0.85	1.6902	0.85	15	7.5	2	0	0	0	0	0	0	5'utr
CRAMP1L	2	25	12	1.55556	0.78	1.54407	0.77	24	12	0	0	2	0	0	0	0	coding
CRCP	3	26	8	2.78409	0.91	2.6902	0.85	23	8	2	0	0	1	0	0	0	5'utr
CREB1	2	28	14	1.80952	0.9	1.59843	0.8	28	14	1	0	0	0	0	0	0	5'utr-intron
CREB3L2	1	13	13	0.846154	0.85	1.04139	1.04	13	13	1	0	0	0	0	0	0	5'utr
CREBBP	6	285	30	4.60044	0.79	6.52032	1.04	167	23	6	0	0	0	0	0	0	5'utr
CREBZF	10	153	11	8.64022	0.87	10.1063	0.93	127	10	1	0	7	0	1	0	0	coding
CREM	2	35	17	1.71242	0.86	1.74819	0.87	26	13	2	0	0	0	0	0	0	5'utr
CRHR1-IT1	1	11	11	0.909091	0.91	1	1	11	11	0	0	0	0	0	0	0	processed_transcript
CRIP2	1	14	14	0.714286	0.71	0.69897	0.7	12	12	0	1	0	0	0	0	0	intron
CRK	1	16	16	0.8125	0.81	1.11394	1.11	12	12	1	0	0	0	0	0	0	5'utr
CRKL	5	322	13	4.56159	1	5.04958	1.08	225	12	3	0	1	1	0	0	0	5'utr
CRLS1	2	30	15	1.79464	0.9	1.95424	0.98	23	11.5	1	0	1	0	0	0	0	5'utr
CRNDE	4	124	22	3.50357	0.9	4.36044	1.07	90	17.5	0	0	0	0	0	0	0	lincRNA_exon
CROCCP2	2	16	8	1.63492	0.82	1.62325	0.81	13	6.5	0	0	0	0	0	0	0	lincRNA_exon
CRTC3	2	43	21	1.52786	0.76	1.51851	0.76	34	17	1	0	0	0	1	0	0	5'utr
CRY1	3	36	10	2.4125	0.81	2.41497	0.78	30	8	3	0	0	0	0	0	0	5'utr
CRYZL1	1	14	14	0.928571	0.93	0.812913	0.81	12	12	1	0	0	0	0	0	0	5'utr
CS	3	41	12	2.81667	0.92	2.97336	0.95	35	9	2	0	1	0	0	0	0	coding
CSDE1	3	59	14	2.16541	0.74	2.52634	0.85	48	14	3	0	0	0	0	0	0	5'utr
CSF1	1	8	8	1	1	0.90309	0.9	7	7	0	0	0	1	0	0	0	3'utr
CSGALNACT2	2	52	26	1.71818	0.86	1.60746	0.8	37	18.5	2	0	0	0	0	0	0	5'utr
CSK	12	740	17	10.6866	0.89	12.7886	0.98	416	14	4	0	3	3	0	0	0	5'utr-intron
CSNK1A1	5	222	31	4.14819	0.86	5.24648	1.04	169	17	5	0	0	0	0	0	0	5'utr
CSNK1D	9	136	9	7.9965	0.86	7.80725	0.85	96	7	3	2	0	3	1	0	0	3'utr
CSNK1E	1	76	76	0.763158	0.76	1.06446	1.06	47	47	1	0	0	0	0	0	0	5'utr
CSNK1G2	8	153	16	7.02505	0.86	7.82858	1.03	116	14	1	0	2	5	0	0	0	5'utr
CSNK1G3	2	21	10	1.78571	0.89	1.89209	0.95	17	8.5	2	0	0	0	0	0	0	5'utr
CSNK2A2	1	92	92	0.891304	0.89	1.61278	1.61	39	39	1	0	0	0	0	0	0	5'utr
CSNK2B	1	21	21	0.904762	0.9	1.27875	1.28	16	16	1	0	0	0	0	0	0	5'utr
CSRNP1	1	7	7	1	1	0.845098	0.85	7	7	0	0	1	0	0	0	0	coding
CSRNP2	4	132	30	3.43524	0.84	4.90655	1.16	81	21.5	2	1	0	0	0	0	0	intron
CST3	1	14	14	0.857143	0.86	1.07918	1.08	12	12	0	0	0	0	0	0	0	intron-5'utr
CSTB	1	53	53	0.792453	0.79	0.845098	0.85	34	34	0	0	0	0	1	0	0	start_codon
CSTF1	1	20	20	1	1	1.30103	1.3	18	18	0	0	0	0	0	0	0	5'utr-intron
CSTF2T	1	7	7	0.714286	0.71	0.69897	0.7	7	7	0	0	1	0	0	0	0	coding
CSTF3	2	36	18	1.59532	0.8	2.27875	1.14	36	18	1	0	0	0	1	0	0	start_codon
CTA-29F11.1	1	7	7	0.857143	0.86	0.778151	0.78	4	4	0	0	0	0	0	0	0	antisense
CTAGE5	1	91	91	0.945055	0.95	1.63347	1.63	10	10	1	0	0	0	0	0	0	5'utr
CTB-79E8.3	1	9	9	1	1	0.954243	0.95	8	8	0	0	0	0	0	0	0	processed_pseudogene
CTBP1	40	687	11	34.417	0.86	37.5794	0.9	528	10	4	20	12	4	0	0	0	3'utr
CTBP1-AS2	4	87	16	3.14429	0.8	3.34305	0.82	71	14.5	0	0	0	0	0	0	0	antisense
CTBS	2	19	9	1.88889	0.94	1.60206	0.8	18	9	0	0	1	0	1	0	0	coding
CTC-338M12.2	1	46	46	0.956522	0.96	1.64345	1.64	12	12	0	0	0	0	0	0	0	lincRNA_exon-lincRNA_intron
CTCF	4	166	39	3.343	0.86	4.42943	1.18	83	18.5	3	0	1	0	0	0	0	5'utr
CTD-2006C1.2	1	9	9	0.888889	0.89	0.90309	0.9	8	8	0	0	0	0	0	0	0	retained_intron
CTD-2090I13.1	1	13	13	0.307692	0.31	0.60206	0.6	5	5	0	0	0	0	0	0	0	lincRNA_exon
CTD-2102P23.1	1	14	14	0.857143	0.86	1.07918	1.08	11	11	0	0	0	0	0	0	0	processed_pseudogene
CTD-2192J16.15	1	105	105	1	1	2.02119	2.02	9	9	0	0	0	0	0	0	0	processed_pseudogene
CTD-2207O23.3	2	41	20	1.72308	0.86	1.98227	0.99	29	14.5	0	0	0	2	0	0	0	3'utr
CTD-2228K2.7	3	25	8	2.9	1	2.4014	0.85	20	6	0	0	0	0	0	0	0	antisense
CTD-2287O16.1	1	12	12	0.916667	0.92	1.04139	1.04	6	6	0	0	0	0	0	0	0	processed_pseudogene
CTD-2336O2.1	1	18	18	0.833333	0.83	0.69897	0.7	16	16	0	0	0	0	0	0	0	antisense
CTD-2587H24.14	1	10	10	0.9	0.9	0.954243	0.95	9	9	0	0	0	0	0	0	0	retained_intron
CTD-2619J13.14	1	13	13	0.769231	0.77	1	1	12	12	0	0	0	0	0	0	0	lincRNA_exon
CTD-2666L21.3	1	15	15	1	1	1.17609	1.18	5	5	0	0	0	0	0	0	0	processed_pseudogene
CTD-3014M21.1	1	22	22	0.863636	0.86	1.27875	1.28	18	18	0	0	0	0	0	0	0	TEC
CTD-3092A11.1	1	7	7	1	1	0.845098	0.85	6	6	0	0	0	0	0	0	0	transcribed_unprocessed_pseudogene
CTD-3214H19.4	1	8	8	0.75	0.75	0.778151	0.78	8	8	0	0	0	0	1	0	0	start_codon
CTD-3222D19.2	1	16	16	0.9375	0.94	0.875061	0.88	9	9	0	0	0	0	0	0	0	nonsense_mediated_decay
CTD-3222D19.8	1	10	10	0.9	0.9	0.653213	0.65	7	7	0	0	0	0	0	0	0	TEC
CTDNEP1	7	623	91	6.01549	0.84	8.11843	1.18	396	53	0	0	0	3	1	0	0	3'utr
CTDP1	5	66	13	4.4781	0.92	4.45062	0.85	56	9	1	0	2	1	1	0	0	5'utr
CTDSP1	3	43	17	2.41095	0.88	2.78958	0.85	36	15	1	0	0	2	0	0	0	5'utr
CTDSP2	2	95	47	1.60158	0.8	1.93323	0.97	43	21.5	2	0	0	0	0	0	0	5'utr
CTDSPL	1	16	16	0.875	0.88	0.845098	0.85	11	11	1	0	0	0	0	0	0	5'utr
CTDSPL2	1	7	7	1	1	0.845098	0.85	7	7	1	0	0	0	0	0	0	5'utr
CTNNA1	1	9	9	1	1	0.954243	0.95	9	9	1	0	0	0	0	0	0	5'utr
CTNNB1	3	71	22	2.56385	0.9	3.902	1.3	52	18	3	0	0	0	0	0	0	5'utr
CTPS1	2	22	11	1.88889	0.94	2.01703	1.01	18	9	2	0	0	0	0	0	0	5'utr
CTR9	1	9	9	1	1	0.954243	0.95	5	5	1	0	0	0	0	0	0	5'utr
CTSC	2	55	27	1.74457	0.87	2.27107	1.14	42	21	0	0	2	0	0	0	0	coding
CTU1	4	35	8	3.52338	0.88	3.51055	0.87	32	8	0	0	3	1	0	0	0	3'utr
CTXN1	7	168	12	6.55304	0.92	7.32706	0.95	103	11	1	0	4	2	0	0	0	3'utr
CUL2	1	8	8	0.625	0.63	0.69897	0.7	8	8	1	0	0	0	0	0	0	5'utr
CUL3	2	29	14	1.68452	0.84	1.77452	0.89	18	9	2	0	0	0	0	0	0	5'utr
CUL4A	3	42	11	2.60985	0.82	2.77706	0.95	35	11	0	2	0	0	1	0	0	intron
CUTA	3	74	32	2.72946	0.89	3.16576	0.89	51	21	0	0	1	0	2	0	0	coding
CWC15	1	12	12	0.75	0.75	0.954243	0.95	12	12	1	0	0	0	0	0	0	5'utr
CXCR4	2	31	15	1.95455	0.98	2.27646	1.14	28	14	0	0	1	0	1	0	0	coding
CXXC1	1	18	18	0.833333	0.83	1.17609	1.18	11	11	1	0	0	0	0	0	0	5'utr
CXorf40B	1	35	35	0.885714	0.89	1.49136	1.49	31	31	1	0	0	0	0	0	0	5'utr
CYB561D2	1	8	8	0.875	0.88	0.845098	0.85	6	6	1	0	0	0	0	0	0	5'utr
CYB5D1	2	16	8	1.75	0.88	1.6902	0.85	15	7.5	2	0	0	0	0	0	0	5'utr
CYC1	1	9	9	0.888889	0.89	0.90309	0.9	9	9	0	0	0	0	1	0	0	start_codon
CYCS	1	83	83	0.903614	0.9	1.09691	1.1	55	55	1	0	0	0	0	0	0	5'utr
CYHR1	4	111	27	3.59016	0.9	4.5649	1.07	57	13.5	0	4	0	0	0	0	0	intron
CYP26B1	1	12	12	0.833333	0.83	0.69897	0.7	8	8	0	1	0	0	0	0	0	intron
CYP2R1	1	17	17	1	1	1.23045	1.23	13	13	0	1	0	0	0	0	0	intron
CYSTM1	2	55	27	1.75833	0.88	2.18752	1.09	39	19.5	1	0	0	0	0	0	0	5'utr
CYTH1	5	46	9	4.63889	1	4.31672	0.9	40	8	0	0	1	4	0	0	0	3'utr
DAD1	3	24	8	2.75	1	2.57749	0.85	22	7	1	0	1	0	0	1	0	stop_codon
DAG1	1	13	13	1	1	1.11394	1.11	3	3	1	0	0	0	0	0	0	5'utr
DAGLB	1	7	7	1	1	0.845098	0.85	4	4	0	0	0	0	1	0	0	start_codon
DANCR	2	22	11	1.54701	0.77	1.54407	0.77	19	9.5	0	0	0	0	0	0	0	lincRNA_exon
DAP3	1	19	19	0.894737	0.89	1.23045	1.23	15	15	0	0	0	0	0	0	0	intron-5'utr
DAPK3	3	49	13	2.6978	0.93	3.01703	0.9	40	10	0	0	0	3	0	0	0	3'utr
DARS2	3	55	16	2.6	0.93	3.42943	1.2	44	12	3	0	0	0	0	0	0	5'utr
DAXX	2	31	15	1.72727	0.86	1.68124	0.84	28	14	1	0	1	0	0	0	0	coding
DAZAP1	1	54	54	0.851852	0.85	1.36173	1.36	30	30	1	0	0	0	0	0	0	5'utr
DAZAP2	1	10	10	0.9	0.9	0.653213	0.65	10	10	0	0	0	0	1	0	0	start_codon
DBF4	2	84	42	1.53668	0.77	1.67025	0.84	63	31.5	1	0	0	0	1	0	0	5'utr
DBN1	2	20	10	1.70833	0.85	1.8451	0.92	14	7	2	0	0	0	0	0	0	5'utr
DBNDD2	3	24	8	3	1	2.70243	0.9	19	6	0	0	2	0	1	0	0	start_codon
DBR1	2	32	16	1.40486	0.7	1.60206	0.8	26	13	1	0	0	0	1	0	0	start_codon
DCAF12	4	90	23	3.50057	0.89	4.35295	1.07	74	19	4	0	0	0	0	0	0	5'utr
DCAF16	3	65	22	2.2785	0.82	2.58433	0.78	54	15	2	0	0	1	0	0	0	3'utr
DCAF4L1	1	8	8	0.875	0.88	0.845098	0.85	5	5	0	0	1	0	0	0	0	coding
DCAF7	3	146	66	2.70714	0.9	3.78686	1.42	88	39	1	0	0	1	1	0	0	5'utr
DCAF8	3	27	9	2.85714	1	2.77379	0.95	20	6	2	0	1	0	0	0	0	coding
DCAKD	2	25	12	1.76389	0.88	1.27107	0.64	24	12	1	1	0	0	0	0	0	5'utr
DCK	1	23	23	0.913043	0.91	1.02119	1.02	15	15	1	0	0	0	0	0	0	5'utr
DCLRE1B	3	27	9	2.36219	0.78	2.22531	0.78	25	9	1	0	2	0	0	0	0	5'utr
DCP2	2	37	18	1.6369	0.82	1.87313	0.94	26	13	2	0	0	0	0	0	0	5'utr
DCTD	5	137	25	4.03871	0.81	4.96241	0.9	101	20	0	4	0	0	1	0	0	intron
DCTN1	1	10	10	0.8	0.8	0.60206	0.6	9	9	0	0	1	0	0	0	0	coding
DCTN2	1	14	14	0.857143	0.86	1.07918	1.08	13	13	1	0	0	0	0	0	0	5'utr
DCTN3	2	36	18	1.77778	0.89	1.98227	0.99	24	12	0	0	1	0	1	0	0	coding
DCTN5	2	42	21	1.37981	0.69	1.99564	1	40	20	1	0	0	0	1	0	0	5'utr
DCTPP1	1	21	21	0.857143	0.86	1.25527	1.26	18	18	0	0	1	0	0	0	0	coding
DCUN1D5	1	209	209	0.885167	0.89	1.42207	1.42	168	168	1	0	0	0	0	0	0	5'utr
DDA1	2	40	20	1.73593	0.87	1.93952	0.97	38	19	1	0	0	1	0	0	0	5'utr
DDAH2	3	48	18	2.34199	0.82	2.33445	0.78	39	16	2	0	0	0	1	0	0	start_codon
DDB1	1	9	9	1	1	0.954243	0.95	8	8	1	0	0	0	0	0	0	5'utr
DDHD1	2	18	9	1.88889	0.94	1.85733	0.93	18	9	1	0	1	0	0	0	0	coding
DDI2	2	23	11	1.85714	0.93	1.98227	0.99	17	8.5	1	0	1	0	0	0	0	5'utr
DDIT3	1	13	13	0.769231	0.77	0.69897	0.7	12	12	1	0	0	0	0	0	0	5'utr
DDIT4	1	36	36	0.944444	0.94	1.05436	1.05	30	30	1	0	0	0	0	0	0	5'utr
DDOST	1	7	7	1	1	0.845098	0.85	5	5	0	0	1	0	0	0	0	coding
DDR1	1	13	13	0.615385	0.62	0.60206	0.6	12	12	1	0	0	0	0	0	0	5'utr
DDX1	1	7	7	0.714286	0.71	0.69897	0.7	5	5	1	0	0	0	0	0	0	5'utr
DDX17	2	34	17	1.81404	0.91	2.36922	1.18	28	14	0	0	1	0	0	0	0	coding
DDX18	1	8	8	1	1	0.90309	0.9	8	8	0	0	0	0	1	0	0	start_codon
DDX20	1	9	9	0.777778	0.78	0.845098	0.85	7	7	0	0	1	0	0	0	0	coding
DDX21	1	8	8	1	1	0.90309	0.9	8	8	0	0	0	0	1	0	0	start_codon
DDX24	1	7	7	1	1	0.845098	0.85	7	7	0	0	1	0	0	0	0	coding
DDX39A	1	7	7	0.857143	0.86	0.778151	0.78	6	6	1	0	0	0	0	0	0	5'utr
DDX39B	6	101	8	5.21927	0.87	5.30356	0.85	93	7.5	1	2	2	0	1	0	0	coding
DDX3X	1	21	21	0.904762	0.9	0.977724	0.98	17	17	0	0	0	0	1	0	0	start_codon
DDX5	6	162	9	5.3623	0.91	5.63819	0.85	141	9.5	1	2	3	0	0	0	0	coding
DDX6	2	17	8	1.85714	0.93	1.77815	0.89	14	7	2	0	0	0	0	0	0	5'utr
DEAF1	3	95	23	2.47726	0.81	2.74819	0.9	80	21	3	0	0	0	0	0	0	5'utr
DEDD2	2	16	8	1.34921	0.67	1.44716	0.72	11	5.5	0	0	1	1	0	0	0	3'utr
DEF6	2	21	10	2	1	1.99123	1	10	5	0	0	2	0	0	0	0	coding
DEK	1	15	15	0.733333	0.73	0.740363	0.74	12	12	1	0	0	0	0	0	0	5'utr
DENND1A	1	8	8	0.75	0.75	0.778151	0.78	7	7	1	0	0	0	0	0	0	5'utr
DENND4B	6	96	14	5.28688	0.87	5.89971	0.94	78	11	4	0	1	0	0	0	0	coding-intron
DENND5A	1	25	25	0.88	0.88	1.34242	1.34	19	19	1	0	0	0	0	0	0	5'utr
DENR	1	17	17	0.882353	0.88	1.17609	1.18	12	12	1	0	0	0	0	0	0	5'utr
DERL1	2	23	11	1.6746	0.84	1.64345	0.82	18	9	2	0	0	0	0	0	0	5'utr
DESI1	2	24	12	1.83333	0.92	2.08279	1.04	22	11	2	0	0	0	0	0	0	5'utr
DESI2	2	120	60	1.66048	0.83	2.69285	1.35	75	37.5	0	0	0	0	0	0	0	processed_transcript
DEXI	7	168	13	5.84676	0.86	7.06315	0.78	101	12	5	0	1	0	1	0	0	coding
DFFA	1	8	8	0.625	0.63	0.69897	0.7	7	7	0	0	0	0	1	0	0	start_codon
DFNB31	2	27	13	1.8	0.9	2.13354	1.07	19	9.5	2	0	0	0	0	0	0	5'utr
DGCR14	1	8	8	0.875	0.88	0.845098	0.85	7	7	0	0	1	0	0	0	0	coding
DGCR6	1	11	11	1	1	1.04139	1.04	7	7	0	0	1	0	0	0	0	coding
DGCR8	2	31	15	1.80476	0.9	1.93197	0.97	24	12	2	0	0	0	0	0	0	5'utr
DGKZ	3	54	10	2.68889	0.89	3.35025	0.9	23	7	0	0	1	1	1	0	0	start_codon
DGUOK	1	17	17	0.941176	0.94	1.20412	1.2	12	12	0	0	0	0	1	0	0	start_codon
DGUOK-AS1	1	9	9	0.888889	0.89	0.90309	0.9	8	8	0	0	0	0	0	0	0	antisense
DHCR7	1	21	21	0.952381	0.95	1.30103	1.3	19	19	0	0	0	0	0	0	0	5'utr-intron
DHFR	1	13	13	0.923077	0.92	1.07918	1.08	13	13	1	0	0	0	0	0	0	5'utr
DHRS7	1	7	7	0.857143	0.86	0.778151	0.78	7	7	0	0	0	0	1	0	0	start_codon
DHRSX	1	36	36	0.972222	0.97	1.24304	1.24	33	33	0	0	0	0	1	0	0	start_codon
DHX15	1	62	62	0.919355	0.92	1.27875	1.28	50	50	1	0	0	0	0	0	0	5'utr
DHX16	3	31	11	2.23576	0.82	2.29667	0.74	26	9	1	0	1	0	1	0	0	coding
DHX30	2	30	15	2	1	2.24551	1.12	27	13.5	0	0	2	0	0	0	0	coding
DHX9	1	7	7	0.857143	0.86	0.778151	0.78	7	7	1	0	0	0	0	0	0	5'utr
DIAPH1	8	106	8	7.06832	0.89	7.18549	0.85	84	7.5	0	0	2	6	0	0	0	3'utr
DIDO1	5	103	18	4.48204	0.92	5.29117	1.04	64	13	0	0	5	0	0	0	0	coding
DIMT1	1	18	18	0.888889	0.89	1.20412	1.2	14	14	1	0	0	0	0	0	0	5'utr
DKC1	1	71	71	0.774648	0.77	0.962211	0.96	53	53	1	0	0	0	0	0	0	5'utr
DLAT	1	19	19	0.842105	0.84	1.20412	1.2	17	17	0	0	0	0	1	0	0	start_codon
DLG1	2	119	59	1.53815	0.77	2.02142	1.01	91	45.5	0	1	0	0	0	0	0	intron
DLG4	2	20	10	1.8	0.9	1.90849	0.95	17	8.5	0	1	0	1	0	0	0	3'utr
DMC1	1	11	11	0.909091	0.91	0.69897	0.7	10	10	1	0	0	0	0	0	0	5'utr
DMPK	4	42	10	3.62308	0.96	3.87852	0.98	41	10	0	0	3	0	0	0	0	coding
DMWD	5	118	18	4.14392	0.78	4.88855	0.85	98	18	0	0	3	2	0	0	0	3'utr
DMXL1	3	31	11	2.61616	0.89	2.54654	0.9	31	11	0	0	0	0	0	0	0	processed_transcript
DNA2	1	12	12	0.833333	0.83	1	1	11	11	0	0	0	0	1	0	0	start_codon
DNAAF2	2	14	7	2	1	1.6902	0.85	11	5.5	0	0	2	0	0	0	0	coding
DNAJA1	1	157	157	0.898089	0.9	1.45025	1.45	78	78	0	0	0	0	0	0	0	5'utr-intron
DNAJA2	1	9	9	1	1	0.954243	0.95	5	5	0	0	0	0	1	0	0	start_codon
DNAJA3	1	19	19	0.894737	0.89	1.23045	1.23	17	17	0	0	1	0	0	0	0	coding
DNAJB1	1	10	10	0.4	0.4	0.60206	0.6	6	6	0	0	1	0	0	0	0	coding
DNAJB11	2	42	21	1.71429	0.86	2.02119	1.01	30	15	2	0	0	0	0	0	0	5'utr
DNAJB2	1	10	10	1	1	1	1	7	7	0	0	0	1	0	0	0	3'utr
DNAJC1	2	16	8	1.88889	0.94	1.74819	0.87	14	7	1	0	1	0	0	0	0	coding
DNAJC10	2	23	11	1.82576	0.91	1.74036	0.87	20	10	2	0	0	0	0	0	0	5'utr
DNAJC19	1	59	59	0.610169	0.61	1.07918	1.08	25	25	1	0	0	0	0	0	0	5'utr
DNAJC21	3	98	22	2.61298	0.91	3.07918	1	58	15	2	0	1	0	0	0	0	5'utr
DNAJC25-GNG10	2	14	7	1.85714	0.93	1.5563	0.78	13	6.5	0	0	2	0	0	0	0	coding
DNAJC5	5	81	9	4.40184	0.91	4.629	0.9	64	8	1	0	0	4	0	0	0	5'utr
DNAJC8	1	34	34	0.970588	0.97	1.51851	1.52	27	27	0	0	0	0	1	0	0	start_codon
DNAJC9	3	38	12	2.84242	0.93	3.22531	1.08	31	9	0	0	2	0	1	0	0	coding
DNASE1	2	19	9	1.75	0.88	1.81954	0.91	18	9	1	0	0	0	0	0	0	nonsense_mediated_decay
DNLZ	1	8	8	0.75	0.75	0.778151	0.78	8	8	0	0	1	0	0	0	0	coding
DNM2	1	11	11	0.909091	0.91	1	1	11	11	0	0	0	1	0	0	0	3'utr
DNMT1	1	9	9	0.777778	0.78	0.845098	0.85	8	8	0	0	1	0	0	0	0	coding
DNPH1	1	10	10	1	1	1	1	7	7	0	0	1	0	0	0	0	coding
DOHH	6	101	13	5.45255	0.91	5.62266	0.92	82	12.5	2	0	2	2	0	0	0	3'utr
DOK2	1	7	7	0.857143	0.86	0.778151	0.78	5	5	0	0	1	0	0	0	0	coding
DOLPP1	1	8	8	1	1	0.90309	0.9	8	8	0	0	0	1	0	0	0	3'utr
DOT1L	2	19	9	1.77778	0.89	1.8451	0.92	19	9.5	0	0	1	1	0	0	0	coding
DPAGT1	2	34	17	1.91667	0.96	2.04139	1.02	29	14.5	2	0	0	0	0	0	0	5'utr
DPF2	1	8	8	1	1	0.90309	0.9	5	5	0	0	1	0	0	0	0	coding
DPH2	1	7	7	0.714286	0.71	0.69897	0.7	6	6	0	0	1	0	0	0	0	coding
DPH7	1	8	8	1	1	0.90309	0.9	7	7	1	0	0	0	0	0	0	5'utr
DPM2	1	9	9	0.888889	0.89	0.90309	0.9	9	9	1	0	0	0	0	0	0	5'utr
DPP7	2	22	11	2	1	2.02119	1.01	18	9	0	0	1	0	0	0	0	coding
DPP8	1	24	24	0.916667	0.92	1.04139	1.04	23	23	1	0	0	0	0	0	0	5'utr
DPP9	2	18	9	1.475	0.74	1.62325	0.81	18	9	1	0	0	1	0	0	0	3'utr
DPY19L3	1	16	16	1	1	1.20412	1.2	10	10	1	0	0	0	0	0	0	5'utr
DPY30	1	8	8	1	1	0.90309	0.9	7	7	1	0	0	0	0	0	0	5'utr
DPYD	1	8	8	1	1	0.90309	0.9	7	7	1	0	0	0	0	0	0	5'utr
DR1	4	251	62	3.35521	0.82	4.44467	1.07	186	44.5	3	0	0	0	0	0	0	5'utr
DRAP1	1	10	10	0.9	0.9	0.954243	0.95	8	8	1	0	0	0	0	0	0	5'utr
DRG1	1	9	9	0.888889	0.89	0.90309	0.9	9	9	0	0	1	0	0	0	0	coding
DSN1	2	26	13	1.83007	0.92	1.80618	0.9	19	9.5	2	0	0	0	0	0	0	5'utr
DSTN	1	7	7	0.857143	0.86	0.778151	0.78	7	7	1	0	0	0	0	0	0	5'utr
DTNBP1	1	54	54	0.87037	0.87	1.07004	1.07	41	41	1	0	0	0	0	0	0	5'utr
DTX1	1	8	8	1	1	0.90309	0.9	4	4	1	0	0	0	0	0	0	5'utr
DTYMK	3	29	10	2.77778	1	2.8451	1	23	7	0	0	1	1	1	0	0	3'utr
DUS1L	1	9	9	1	1	0.954243	0.95	9	9	0	0	1	0	0	0	0	coding
DUS3L	2	17	8	1.85714	0.93	1.77815	0.89	17	8.5	0	0	1	0	0	1	0	stop_codon
DUSP1	1	8	8	1	1	0.90309	0.9	8	8	1	0	0	0	0	0	0	5'utr
DUSP2	10	4261	99	8.4407	0.85	11.9233	1.18	1917	69.5	1	0	5	0	1	1	0	stop_codon
DUSP22	1	8	8	1	1	0.90309	0.9	8	8	1	0	0	0	0	0	0	5'utr
DUSP5	7	181	14	5.84689	0.79	6.34595	0.87	139	14	2	0	5	0	0	0	0	5'utr
DUT	1	28	28	0.821429	0.82	0.884607	0.88	19	19	0	0	0	0	1	0	0	start_codon
DVL1	1	13	13	0.846154	0.85	1.04139	1.04	12	12	1	0	0	0	0	0	0	5'utr
DVL2	1	13	13	1	1	1.11394	1.11	8	8	1	0	0	0	0	0	0	5'utr
DVL3	1	10	10	0.7	0.7	0.845098	0.85	9	9	1	0	0	0	0	0	0	5'utr
DYM	1	7	7	0.857143	0.86	0.778151	0.78	5	5	1	0	0	0	0	0	0	5'utr
DYNC1H1	1	8	8	1	1	0.90309	0.9	7	7	1	0	0	0	0	0	0	5'utr
DYNLL1	1	12	12	0.833333	0.83	1	1	10	10	0	0	0	0	0	0	0	5'utr-intron
DYNLL2	5	115	11	4.26955	0.86	4.58822	0.95	87	11	2	0	0	3	0	0	0	5'utr
DYNLRB1	1	7	7	0.857143	0.86	0.778151	0.78	6	6	1	0	0	0	0	0	0	5'utr
DYRK1A	6	1018	88	4.97628	0.79	7.906	1.27	416	48	0	0	0	0	0	0	0	processed_transcript
DYRK3	2	28	14	1.85641	0.93	2.22531	1.11	26	13	1	0	1	0	0	0	0	5'utr
E2F1	4	78	20	3.34421	0.86	3.72016	0.81	56	15	1	0	2	1	0	0	0	3'utr
E2F2	8	276	27	6.83578	0.86	8.67187	1.15	193	19	4	0	2	2	0	0	0	3'utr
E2F3	4	33	7	3.2987	0.86	2.95231	0.72	27	6	2	0	1	1	0	0	0	5'utr
E2F4	1	12	12	0.833333	0.83	0.69897	0.7	12	12	0	0	0	0	1	0	0	start_codon
E2F5	1	8	8	0.875	0.88	0.845098	0.85	8	8	1	0	0	0	0	0	0	5'utr
E2F6	1	26	26	0.884615	0.88	1.36173	1.36	20	20	1	0	0	0	0	0	0	5'utr
EAF1	2	34	17	1.82576	0.91	1.74036	0.87	29	14.5	2	0	0	0	0	0	0	5'utr
EBNA1BP2	1	17	17	1	1	1.23045	1.23	13	13	0	1	0	0	0	0	0	intron
EBP	1	7	7	0.857143	0.86	0.778151	0.78	6	6	1	0	0	0	0	0	0	5'utr
ECE1	1	14	14	0.785714	0.79	0.740363	0.74	11	11	1	0	0	0	0	0	0	5'utr
ECHDC1	1	10	10	0.9	0.9	0.954243	0.95	10	10	0	0	0	0	0	1	0	stop_codon
ECSIT	1	14	14	1	1	1.14613	1.15	8	8	0	0	1	0	0	0	0	coding
EDC3	1	62	62	0.935484	0.94	1.16137	1.16	57	57	1	0	0	0	0	0	0	5'utr
EDC4	1	54	54	0.907407	0.91	1.21307	1.21	43	43	1	0	0	0	0	0	0	5'utr
EDEM1	8	160	19	7.31103	0.91	8.04349	0.97	137	17.5	1	0	6	0	1	0	0	5'utr
EDEM2	1	10	10	1	1	1	1	6	6	0	0	1	0	0	0	0	coding
EDF1	1	19	19	0.842105	0.84	1.20412	1.2	16	16	0	0	0	0	1	0	0	start_codon
EDRF1	1	8	8	1	1	0.90309	0.9	5	5	0	0	0	0	1	0	0	start_codon
EED	2	23	11	1.85714	0.93	2.03342	1.02	21	10.5	2	0	0	0	0	0	0	5'utr
EEF1B2	2	27	13	1.85714	0.93	2.19312	1.1	21	10.5	1	0	0	0	1	0	0	5'utr
EEF1D	5	64	8	4.80451	1	5.18203	0.9	52	7	4	0	0	0	0	0	0	5'utr
EEF1DP1	1	16	16	0.9375	0.94	0.875061	0.88	12	12	0	0	0	0	0	0	0	processed_pseudogene
EEF1GP5	1	19	19	0.631579	0.63	0.60206	0.6	14	14	0	0	0	0	0	0	0	processed_pseudogene
EEF2	7	82	10	6.07894	0.9	5.57749	0.82	64	6	1	0	3	3	0	0	0	3'utr
EFHD2	9	175	18	7.09683	0.78	8.1252	0.81	151	14	0	0	2	6	1	0	0	start_codon
EFNA4	1	8	8	0.875	0.88	0.845098	0.85	7	7	0	0	0	0	1	0	0	start_codon
EFNB1	2	16	8	1.75	0.88	1.68124	0.84	13	6.5	2	0	0	0	0	0	0	5'utr
EGLN1	1	7	7	0.714286	0.71	0.69897	0.7	6	6	1	0	0	0	0	0	0	5'utr
EGLN2	3	36	8	2.61905	0.86	2.58433	0.9	35	8	1	1	1	0	0	0	0	intron
EGR1	23	2005	15	19.0689	0.86	23.7352	0.95	976	15	2	0	13	8	0	0	0	5'utr
EGR2	3	41	8	2.78022	0.92	3.06145	0.9	21	6	1	0	2	0	0	0	0	coding
EHD1	2	14	7	1.71429	0.86	1.5563	0.78	14	7	0	0	0	2	0	0	0	3'utr
EI24	1	23	23	0.73913	0.74	0.753328	0.75	14	14	0	0	0	0	0	0	0	5'utr-intron
EID1	1	8	8	1	1	0.90309	0.9	7	7	0	0	0	1	0	0	0	3'utr
EIF1	9	1027	46	6.49172	0.74	10.3379	1.12	647	45	0	0	2	4	1	0	0	processed_transcript
EIF1AD	4	51	12	3.57222	0.91	3.76938	0.89	46	9.5	2	0	0	0	0	0	0	intron-5'utr
EIF1AX	1	29	29	0.965517	0.97	1.44716	1.45	26	26	1	0	0	0	0	0	0	5'utr
EIF1B	4	112	17	3.4157	0.82	3.86848	0.97	83	15.5	2	0	1	0	1	0	0	5'utr
EIF2AK1	1	7	7	1	1	0.845098	0.85	6	6	1	0	0	0	0	0	0	5'utr
EIF2AK3	1	8	8	0.875	0.88	0.845098	0.85	7	7	0	0	1	0	0	0	0	coding
EIF2B1	1	15	15	0.866667	0.87	0.812913	0.81	11	11	1	0	0	0	0	0	0	5'utr
EIF2S1	3	57	17	2.44002	0.82	3.4062	1.15	42	14	2	0	1	0	0	0	0	5'utr
EIF3A	1	13	13	0.769231	0.77	1	1	13	13	0	0	1	0	0	0	0	coding
EIF3B	2	38	19	1.68889	0.84	1.93112	0.97	30	15	0	0	1	0	1	0	0	start_codon
EIF3CL	1	30	30	0.966667	0.97	1.4624	1.46	5	5	0	0	1	0	0	0	0	coding
EIF3G	2	21	10	1.57143	0.79	1.77815	0.89	16	8	1	0	1	0	0	0	0	coding
EIF3J	2	56	28	1.49275	0.75	1.66693	0.83	37	18.5	0	0	2	0	0	0	0	coding
EIF3K	1	19	19	0.789474	0.79	0.875061	0.88	18	18	0	0	0	0	1	0	0	start_codon
EIF3M	2	21	10	1.91667	0.96	1.99564	1	18	9	0	0	0	0	1	0	0	nonsense_mediated_decay
EIF4A3	1	129	129	0.821705	0.82	0.983913	0.98	105	105	0	0	0	0	1	0	0	start_codon
EIF4G1	6	382	32	4.80797	0.82	5.63609	0.86	180	26	1	0	1	2	0	1	0	5'utr
EIF4G2	7	344	27	5.9716	0.84	8.15948	1	256	25	2	0	3	0	0	0	0	coding
EIF4G3	5	131	28	4.37433	0.92	5.47061	1.01	62	11	3	2	0	0	0	0	0	intron
EIF4H	2	21	10	1.57143	0.79	1.77815	0.89	20	10	0	0	0	1	1	0	0	start_codon
EIF5	2	180	90	1.72507	0.86	2.69618	1.35	132	66	0	1	0	0	0	0	0	intron
EIF5A	7	625	14	6.1626	0.92	7.9754	1.11	356	14	1	0	0	5	1	0	0	5'utr
EIF5AL1	5	303	38	4.63163	0.92	7.08377	1.54	88	10	1	0	0	4	0	0	0	5'utr
EIF5B	1	7	7	1	1	0.845098	0.85	7	7	1	0	0	0	0	0	0	5'utr
EIF6	3	30	9	2.80556	0.92	2.89873	0.95	29	9	1	0	1	1	0	0	0	3'utr
ELAVL1	4	51	11	3.18385	0.77	3.64444	0.9	49	11	1	1	0	2	0	0	0	3'utr
ELF1	5	295	25	3.5512	0.71	4.8858	0.97	162	16	2	1	0	1	0	0	0	3'utr
ELF2	1	7	7	0.857143	0.86	0.778151	0.78	7	7	1	0	0	0	0	0	0	5'utr
ELK1	3	37	10	2.66471	0.9	2.59106	0.95	33	10	2	0	1	0	0	0	0	coding
ELK4	3	41	13	2.62308	0.92	2.82737	0.9	34	12	3	0	0	0	0	0	0	5'utr
ELMSAN1	8	120	13	6.76375	0.91	7.53922	0.92	87	10	7	0	1	0	0	0	0	coding
ELOF1	1	8	8	0.75	0.75	0.778151	0.78	8	8	0	0	0	1	0	0	0	3'utr
ELOVL4	1	23	23	0.913043	0.91	0.845098	0.85	9	9	1	0	0	0	0	0	0	5'utr
ELOVL5	3	99	12	2.48046	0.83	2.6744	0.95	68	8	2	1	0	0	0	0	0	intron
ELP3	1	7	7	1	1	0.845098	0.85	5	5	0	0	0	0	1	0	0	start_codon
ELP5	3	65	11	2.66364	0.86	3.52427	1.04	54	10	1	0	1	0	0	0	0	5'utr-intron
EMB	1	26	26	0.846154	0.85	1.34242	1.34	18	18	1	0	0	0	0	0	0	5'utr
EMC10	1	15	15	1	1	1.17609	1.18	9	9	0	0	1	0	0	0	0	coding
EMC3-AS1	1	9	9	1	1	0.954243	0.95	7	7	0	0	0	0	0	0	0	processed_transcript
EMC4	1	36	36	0.861111	0.86	1.01424	1.01	33	33	1	0	0	0	0	0	0	5'utr
EMC6	1	8	8	0.75	0.75	0.778151	0.78	7	7	0	0	0	0	1	0	0	start_codon
EMC7	2	37	18	1.68235	0.84	2.38021	1.19	34	17	0	0	1	0	1	0	0	coding
EMC8	3	194	32	2.71077	0.92	3.62941	1.18	101	22	2	0	1	0	0	0	0	coding
EMC9	1	15	15	0.933333	0.93	1.14613	1.15	15	15	1	0	0	0	0	0	0	5'utr
EMD	1	27	27	0.777778	0.78	1.32222	1.32	22	22	1	0	0	0	0	0	0	5'utr
EMILIN2	1	14	14	0.928571	0.93	1.11394	1.11	8	8	0	1	0	0	0	0	0	intron
EMP3	1	26	26	0.807692	0.81	0.845098	0.85	23	23	1	0	0	0	0	0	0	5'utr
ENDOG	4	46	11	3.80833	0.97	4.04044	1.02	35	9	1	0	3	0	0	0	0	5'utr
ENKD1	2	15	7	1.73214	0.87	1.62325	0.81	13	6.5	2	0	0	0	0	0	0	5'utr
ENO1	2	257	128	1.76792	0.88	2.63949	1.32	145	72.5	0	0	0	1	0	0	0	3'utr
ENOPH1	4	75	14	3.20513	0.85	3.2974	0.73	54	9	3	0	0	0	1	0	0	5'utr
ENSA	3	47	15	2.03333	0.75	2.989	1.11	41	12	1	0	0	1	1	0	0	3'utr
ENSAP2	1	10	10	0.8	0.8	0.90309	0.9	8	8	0	0	0	0	0	0	0	processed_pseudogene
ENTPD4	1	12	12	1	1	1.07918	1.08	7	7	1	0	0	0	0	0	0	5'utr
ENY2	1	11	11	0.818182	0.82	0.653213	0.65	10	10	1	0	0	0	0	0	0	5'utr
EP300	8	495	23	6.62058	0.82	8.97724	1.07	292	16.5	7	0	1	0	0	0	0	5'utr
EP400NL	3	26	8	2.76623	0.91	2.68124	0.9	22	7	2	0	0	0	0	0	0	processed_transcript
EPAS1	1	8	8	0.875	0.88	0.845098	0.85	7	7	1	0	0	0	0	0	0	5'utr
EPB41L4A-AS1	1	8	8	0.75	0.75	0.778151	0.78	8	8	0	0	0	0	0	0	0	lincRNA_exon
EPB41L4B	1	7	7	1	1	0.845098	0.85	7	7	1	0	0	0	0	0	0	5'utr
EPC2	1	9	9	0.777778	0.78	0.845098	0.85	4	4	0	0	1	0	0	0	0	coding
EPDR1	3	35	11	2.66434	0.91	2.43933	0.7	31	10	2	0	1	0	0	0	0	5'utr
EPHB6	2	22	11	1.66667	0.83	1.90309	0.95	20	10	1	0	1	0	0	0	0	5'utr
EPN1	1	10	10	0.9	0.9	0.653213	0.65	5	5	1	0	0	0	0	0	0	5'utr
EPPK1	1	20	20	1	1	1.30103	1.3	4	4	0	0	1	0	0	0	0	coding
EPT1	1	9	9	0.777778	0.78	0.845098	0.85	9	9	0	0	0	0	1	0	0	start_codon
ERAL1	1	9	9	0.888889	0.89	0.60206	0.6	4	4	0	0	0	0	1	0	0	start_codon
ERCC3	1	10	10	0.8	0.8	0.60206	0.6	10	10	1	0	0	0	0	0	0	5'utr
ERCC5	1	11	11	0.818182	0.82	0.954243	0.95	11	11	0	0	0	0	1	0	0	start_codon
ERF	8	90	9	6.44935	0.81	6.61667	0.81	76	8.5	0	0	3	3	1	1	0	3'utr
ERGIC2	1	12	12	0.833333	0.83	0.69897	0.7	12	12	1	0	0	0	0	0	0	5'utr
ERH	3	71	15	2.82917	0.93	3.38166	1.15	58	15	1	0	1	1	0	0	0	3'utr
ERI1	1	8	8	1	1	0.90309	0.9	7	7	1	0	0	0	0	0	0	5'utr
ERI3	1	8	8	1	1	0.90309	0.9	7	7	0	0	0	0	0	0	0	processed_transcript
ERICH1	1	8	8	1	1	0.90309	0.9	6	6	0	0	0	0	1	0	0	start_codon
ERLEC1	1	10	10	0.9	0.9	0.954243	0.95	10	10	0	0	0	0	1	0	0	start_codon
ERMP1	1	10	10	0.8	0.8	0.60206	0.6	10	10	1	0	0	0	0	0	0	5'utr
ERN1	1	7	7	1	1	0.845098	0.85	5	5	0	0	0	0	0	0	0	retained_intron
ERO1L	1	11	11	0.818182	0.82	0.954243	0.95	10	10	0	0	0	0	0	0	0	nonsense_mediated_decay
ERO1LB	1	11	11	0.909091	0.91	1	1	11	11	1	0	0	0	0	0	0	5'utr
ERP29	2	36	18	1.95652	0.98	2.45637	1.23	25	12.5	0	0	1	0	1	0	0	start_codon
ERP44	1	17	17	0.882353	0.88	0.875061	0.88	15	15	1	0	0	0	0	0	0	5'utr
ERVK3-1	1	17	17	1	1	1.23045	1.23	13	13	0	0	0	0	0	0	0	lincRNA_exon
ESCO1	1	18	18	0.722222	0.72	1.11394	1.11	17	17	1	0	0	0	0	0	0	5'utr
ESRRA	3	23	8	2.60714	0.86	2.45939	0.78	23	8	1	0	2	0	0	0	0	5'utr
ESYT2	4	107	24	3.42195	0.85	4.04007	0.97	74	14.5	0	0	2	0	0	0	0	coding-intron
ETFB	1	15	15	0.866667	0.87	1.11394	1.11	11	11	0	0	0	0	1	0	0	start_codon
ETNK1	4	53	12	3.67778	0.95	4.25873	1.08	45	9.5	0	0	4	0	0	0	0	coding
ETS1	2	94	47	1.72743	0.86	2.46933	1.23	67	33.5	1	0	0	1	0	0	0	3'utr
ETS2	2	30	15	1.61086	0.81	1.85431	0.93	24	12	2	0	0	0	0	0	0	5'utr
ETV3	1	20	20	0.9	0.9	1.25527	1.26	17	17	1	0	0	0	0	0	0	5'utr
ETV5	1	7	7	0.857143	0.86	0.778151	0.78	7	7	1	0	0	0	0	0	0	5'utr
ETV6	2	28	14	1.67836	0.84	2.07918	1.04	26	13	2	0	0	0	0	0	0	5'utr
EVL	5	77	14	4.4545	0.88	5.2355	1.11	61	13	4	0	0	1	0	0	0	5'utr
EXO1	2	58	29	1.86944	0.93	2.49762	1.25	41	20.5	2	0	0	0	0	0	0	5'utr
EXOC7	1	11	11	0.909091	0.91	1	1	9	9	0	0	0	1	0	0	0	3'utr
EXOSC3	5	52	10	4.6395	0.9	4.19292	0.85	44	9	0	0	5	0	0	0	0	coding
EXOSC4	1	22	22	1	1	1.34242	1.34	20	20	0	0	0	0	1	0	0	start_codon
EXOSC6	7	96	11	5.96548	0.86	5.99285	0.78	85	10	0	0	7	0	0	0	0	coding
EXOSC8	2	18	9	1.9	0.95	1.85733	0.93	15	7.5	0	1	0	0	1	0	0	start_codon
EXT2	1	11	11	0.818182	0.82	0.653213	0.65	10	10	1	0	0	0	0	0	0	5'utr
EXTL3	1	11	11	0.909091	0.91	1	1	7	7	0	0	1	0	0	0	0	coding
F8A1	1	7	7	0.714286	0.71	0.69897	0.7	7	7	0	0	1	0	0	0	0	coding
FADD	2	40	20	1.71875	0.86	1.97543	0.99	25	12.5	1	0	0	1	0	0	0	5'utr
FADS2	12	294	13	9.69168	0.79	11.4598	1	253	12	2	0	0	9	1	0	0	5'utr
FAF1	3	31	9	2.4359	0.78	2.44716	0.85	27	9	3	0	0	0	0	0	0	5'utr
FAM101A	2	73	36	1.81494	0.91	1.90006	0.95	47	23.5	2	0	0	0	0	0	0	5'utr
FAM102A	3	35	13	2.64689	0.87	2.97128	1.08	25	9	2	0	0	1	0	0	0	3'utr
FAM102B	1	16	16	0.8125	0.81	1.11394	1.11	12	12	1	0	0	0	0	0	0	5'utr
FAM103A1	1	10	10	0.6	0.6	0.778151	0.78	10	10	1	0	0	0	0	0	0	5'utr
FAM104A	2	23	11	1.9375	0.97	2.02119	1.01	20	10	0	0	2	0	0	0	0	coding
FAM110A	1	27	27	0.814815	0.81	0.740363	0.74	21	21	1	0	0	0	0	0	0	5'utr
FAM111A	2	17	8	1.6	0.8	1.62325	0.81	15	7.5	2	0	0	0	0	0	0	5'utr
FAM120A	1	11	11	0.909091	0.91	0.69897	0.7	5	5	0	0	1	0	0	0	0	coding
FAM120AOS	3	98	13	2.66693	0.9	3.90233	1.04	49	12	0	3	0	0	0	0	0	intron
FAM122B	1	15	15	0.666667	0.67	0.69897	0.7	15	15	1	0	0	0	0	0	0	5'utr
FAM133B	1	38	38	0.864865	0.86	1.20412	1.2	28	28	0	0	0	0	1	0	0	start_codon
FAM133DP	1	9	9	0.888889	0.89	0.90309	0.9	7	7	0	0	0	0	0	0	0	processed_pseudogene
FAM134A	2	75	37	1.66667	0.83	2.06258	1.03	57	28.5	0	0	1	0	1	0	0	start_codon
FAM134C	2	17	8	1.8	0.9	1.44716	0.72	15	7.5	0	0	1	0	1	0	0	coding
FAM13B	1	17	17	0.941176	0.94	1.20412	1.2	10	10	1	0	0	0	0	0	0	5'utr
FAM151B	1	127	127	0.133858	0.13	0.929419	0.93	18	18	0	1	0	0	0	0	0	intron
FAM156A	1	7	7	1	1	0.845098	0.85	6	6	1	0	0	0	0	0	0	5'utr
FAM160B1	1	15	15	0.8	0.8	0.778151	0.78	15	15	1	0	0	0	0	0	0	5'utr
FAM162A	1	11	11	1	1	1.04139	1.04	9	9	1	0	0	0	0	0	0	5'utr
FAM168A	3	65	21	2.73465	0.9	3.23779	1.11	41	14	3	0	0	0	0	0	0	5'utr
FAM168B	16	267	13	12.9662	0.79	14.454	0.85	236	13	1	1	0	13	0	0	0	3'utr
FAM169A	1	8	8	1	1	0.90309	0.9	7	7	0	1	0	0	0	0	0	intron
FAM173A	1	10	10	0.9	0.9	0.954243	0.95	10	10	0	0	1	0	0	0	0	coding
FAM177A1	2	33	16	1.92308	0.96	2.07918	1.04	23	11.5	0	1	0	0	1	0	0	intron
FAM189B	1	16	16	0.8125	0.81	1.11394	1.11	14	14	1	0	0	0	0	0	0	5'utr
FAM192A	1	27	27	0.814815	0.81	1.04139	1.04	26	26	0	0	0	0	0	0	0	5'utr-intron
FAM199X	1	12	12	0.333333	0.33	0.60206	0.6	7	7	1	0	0	0	0	0	0	5'utr
FAM200B	1	14	14	0.857143	0.86	1.07918	1.08	11	11	1	0	0	0	0	0	0	5'utr
FAM208A	1	47	47	0.87234	0.87	1.31175	1.31	26	26	1	0	0	0	0	0	0	5'utr
FAM208B	4	178	43	3.34944	0.83	4.00988	0.98	109	27.5	4	0	0	0	0	0	0	5'utr
FAM20B	1	47	47	0.957447	0.96	1.17609	1.18	25	25	1	0	0	0	0	0	0	5'utr
FAM210A	3	59	21	2.37024	0.76	3.39164	1.2	49	20	3	0	0	0	0	0	0	5'utr
FAM214A	2	24	12	1.67832	0.84	1.69897	0.85	23	11.5	0	0	0	0	0	0	0	nonsense_mediated_decay
FAM219A	1	22	22	0.772727	0.77	0.628389	0.63	20	20	1	0	0	0	0	0	0	5'utr
FAM229B	1	7	7	1	1	0.845098	0.85	5	5	0	0	0	0	0	0	0	5'utr-intron
FAM24B	1	23	23	0.913043	0.91	1.32222	1.32	17	17	1	0	0	0	0	0	0	5'utr
FAM35BP	1	13	13	0.769231	0.77	0.69897	0.7	11	11	0	0	0	0	0	0	0	transcribed_unprocessed_pseudogene
FAM35DP	2	80	40	1.65166	0.83	1.69648	0.85	36	18	0	0	0	0	0	0	0	unprocessed_pseudogene
FAM3A	2	24	12	1.37143	0.69	1.50515	0.75	22	11	1	0	0	0	0	0	0	5'utr-intron
FAM3C	1	10	10	0.8	0.8	0.90309	0.9	10	10	1	0	0	0	0	0	0	5'utr
FAM49B	2	141	70	1.67058	0.84	2.03743	1.02	87	43.5	2	0	0	0	0	0	0	5'utr
FAM53B	4	57	15	3.28889	0.84	3.58973	0.84	53	14.5	0	0	2	2	0	0	0	3'utr
FAM53C	1	11	11	0.818182	0.82	0.653213	0.65	10	10	1	0	0	0	0	0	0	5'utr
FAM60A	1	26	26	0.769231	0.77	0.823909	0.82	22	22	1	0	0	0	0	0	0	5'utr
FAM63B	2	21	10	1.92857	0.96	1.95904	0.98	16	8	0	0	2	0	0	0	0	coding
FAM66B	1	7	7	0.857143	0.86	0.778151	0.78	7	7	0	0	0	0	0	0	0	lincRNA_exon
FAM72A	2	28	14	1.7619	0.88	1.5721	0.79	20	10	1	0	0	0	0	0	0	5'utr
FAM72B	3	33	12	2.63141	0.88	2.92428	1	25	8	3	0	0	0	0	0	0	5'utr
FAM72C	2	33	16	1.76957	0.88	1.65321	0.83	27	13.5	2	0	0	0	0	0	0	5'utr
FAM72D	6	135	21	4.6145	0.77	5.34331	0.89	110	17.5	5	0	1	0	0	0	0	5'utr
FAM76B	1	21	21	0.904762	0.9	0.977724	0.98	10	10	1	0	0	0	0	0	0	5'utr
FAM78A	1	12	12	0.75	0.75	0.954243	0.95	10	10	0	0	0	1	0	0	0	3'utr
FAM83D	2	17	8	1.51389	0.76	1.30103	0.65	15	7.5	0	0	2	0	0	0	0	coding
FAM83H	9	115	11	7.75198	0.88	8.3386	0.95	100	10	1	3	4	1	0	0	0	3'utr
FAM91A1	1	9	9	0.666667	0.67	0.778151	0.78	7	7	1	0	0	0	0	0	0	5'utr
FAM96A	2	26	13	1.61905	0.81	1.74036	0.87	23	11.5	1	0	0	0	1	0	0	start_codon
FAM96B	5	114	18	4.13651	0.86	5.30539	1.08	86	17	0	1	1	0	1	1	0	stop_codon
FAM98C	1	7	7	1	1	0.845098	0.85	7	7	0	0	0	0	0	0	0	coding-intron
FANCG	2	37	18	1.86207	0.93	1.82391	0.91	28	14	2	0	0	0	0	0	0	5'utr
FARSA	1	33	33	0.878788	0.88	0.985277	0.99	30	30	0	0	0	0	1	0	0	start_codon
FASN	2	21	10	1.85714	0.93	1.92428	0.96	15	7.5	0	0	0	2	0	0	0	3'utr
FAT1	3	24	8	2.625	0.88	2.53529	0.85	24	8	0	0	3	0	0	0	0	coding
FAU	3	295	26	2.71697	0.92	2.65128	0.9	108	18	1	0	2	0	0	0	0	coding
FBL	2	74	37	1.54283	0.77	2.28179	1.14	60	30	1	0	0	0	0	0	0	coding-intron
FBRS	13	195	12	10.9402	0.86	12.4092	0.9	150	8	6	0	6	1	0	0	0	5'utr
FBRSL1	12	152	9	10.2088	0.86	10.4047	0.85	127	9	4	5	3	0	0	0	0	5'utr
FBXL12	1	10	10	0.8	0.8	0.60206	0.6	8	8	1	0	0	0	0	0	0	5'utr
FBXL14	5	87	17	4.31525	0.91	5.18469	1	77	16	1	1	3	0	0	0	0	intron
FBXL15	2	19	9	1.81818	0.91	1.5563	0.78	15	7.5	0	1	0	0	0	0	0	intron
FBXL17	3	29	10	2.8	0.9	2.5617	0.95	24	7	2	0	1	0	0	0	0	coding
FBXL18	1	18	18	0.944444	0.94	1.23045	1.23	7	7	0	0	0	0	0	0	0	nonsense_mediated_decay
FBXL19	16	345	17	13.3359	0.83	14.4409	0.85	292	15.5	1	0	6	9	0	0	0	5'utr
FBXL3	2	54	27	1.71711	0.86	2.65128	1.33	42	21	2	0	0	0	0	0	0	5'utr
FBXL5	1	8	8	1	1	0.90309	0.9	6	6	0	0	0	0	0	0	0	processed_transcript
FBXO25	1	13	13	0.769231	0.77	0.69897	0.7	12	12	1	0	0	0	0	0	0	5'utr
FBXO31	2	21	10	1.64286	0.82	1.51188	0.76	16	8	0	0	1	1	0	0	0	3'utr
FBXO33	4	42	10	3.35363	0.9	3.70243	0.96	40	10	1	0	3	0	0	0	0	coding
FBXO34	3	51	9	2.8	1	2.94547	0.95	48	8	1	1	0	0	0	0	0	5'utr
FBXO41	7	91	11	6.18525	0.88	6.54203	0.9	80	10	2	0	2	2	1	0	0	3'utr
FBXO42	2	28	14	1.84444	0.92	2.18469	1.09	24	12	1	0	1	0	0	0	0	coding
FBXO43	1	8	8	0.75	0.75	0.778151	0.78	8	8	0	0	0	0	0	0	0	nonsense_mediated_decay
FBXO45	3	114	32	2.56522	0.91	3.57801	1.46	79	20	2	0	0	0	1	0	0	5'utr
FBXO46	5	60	10	4.40992	0.88	4.50177	0.85	49	8	0	0	4	0	1	0	0	coding
FBXO5	2	47	23	1.52715	0.76	2.09342	1.05	33	16.5	0	0	1	0	1	0	0	coding
FBXO7	5	62	11	4.57752	0.92	4.845	0.95	50	10	4	0	0	0	1	0	0	5'utr
FBXO8	2	15	7	2	1	1.74819	0.87	13	6.5	2	0	0	0	0	0	0	5'utr
FBXW2	4	82	23	3.38212	0.92	4.3476	1.19	59	15	1	0	0	1	0	1	0	3'utr
FBXW5	4	57	14	3.37683	0.87	3.57749	0.89	52	13.5	0	2	1	0	0	0	0	coding
FBXW7	5	144	22	4.58075	0.93	5.23178	1	107	16	5	0	0	0	0	0	0	5'utr
FCF1	1	7	7	0.857143	0.86	0.778151	0.78	7	7	0	0	0	1	0	0	0	3'utr
FCGBP	1	7	7	1	1	0.845098	0.85	3	3	0	0	1	0	0	0	0	coding
FCGRT	1	8	8	0.625	0.63	0.69897	0.7	6	6	0	0	0	0	0	0	0	intron-5'utr
FCHO2	1	26	26	0.730769	0.73	0.676694	0.68	24	24	0	1	0	0	0	0	0	intron
FDFT1	2	56	28	1.87234	0.94	2.08991	1.04	36	18	0	0	1	0	1	0	0	start_codon
FDPS	1	18	18	0.722222	0.72	1.11394	1.11	16	16	1	0	0	0	0	0	0	5'utr
FDX1	3	47	16	2.50877	0.84	3.02366	1.04	38	11	1	0	1	0	1	0	0	5'utr
FDX1L	1	18	18	0.944444	0.94	1.23045	1.23	17	17	0	0	1	0	0	0	0	coding
FDX1P1	1	21	21	0.809524	0.81	0.753328	0.75	11	11	0	0	0	0	0	0	0	processed_pseudogene
FEM1A	9	150	16	7.96296	0.88	8.74886	0.9	107	10	2	0	2	4	1	0	0	5'utr
FEM1AP4	1	14	14	0.928571	0.93	0.812913	0.81	10	10	0	0	0	0	0	0	0	processed_pseudogene
FEM1B	5	198	31	4.46751	0.87	5.20824	0.95	168	29	4	0	0	0	1	0	0	5'utr
FEN1	2	45	22	1.68571	0.84	1.77815	0.89	31	15.5	2	0	0	0	0	0	0	5'utr
FERMT3	1	11	11	1	1	1.04139	1.04	11	11	0	0	1	0	0	0	0	coding
FGD5-AS1	4	92	20	3.61207	0.93	4.25888	0.98	80	18.5	0	0	0	0	0	0	0	antisense
FGFR1	1	9	9	0.888889	0.89	0.90309	0.9	8	8	1	0	0	0	0	0	0	5'utr
FGFR1OP2	4	68	12	3.69498	0.93	3.95075	1.05	60	11.5	3	0	0	1	0	0	0	5'utr
FGFRL1	1	8	8	0.75	0.75	0.778151	0.78	7	7	0	1	0	0	0	0	0	intron
FHL3	1	7	7	0.571429	0.57	0.60206	0.6	7	7	1	0	0	0	0	0	0	5'utr
FIP1L1	3	70	15	2.52917	0.8	2.6902	0.85	66	15	1	0	1	0	1	0	0	5'utr
FIS1	4	47	11	3.88235	1	3.68124	0.95	35	7.5	1	0	2	0	0	0	0	coding
FIZ1	6	74	8	5.24206	0.89	5.31345	0.85	63	8.5	0	0	5	1	0	0	0	3'utr
FKBP1A	2	36	18	1.36453	0.68	1.96379	0.98	28	14	0	0	0	1	1	0	0	3'utr
FKBP2	2	18	9	1.65	0.83	1.73239	0.87	15	7.5	0	0	2	0	0	0	0	coding
FKBP4	1	12	12	1	1	1.07918	1.08	9	9	1	0	0	0	0	0	0	5'utr
FKBP8	1	60	60	0.683333	0.68	0.767686	0.77	50	50	0	0	0	0	1	0	0	start_codon
FKRP	1	8	8	0.625	0.63	0.69897	0.7	8	8	0	0	0	1	0	0	0	3'utr
FLCN	3	48	12	2.74576	0.92	3.10209	1.04	36	11	3	0	0	0	0	0	0	5'utr
FLI1	3	40	10	2.4	0.8	2.70927	0.9	29	7	3	0	0	0	0	0	0	5'utr
FLJ31306	2	47	23	1.80451	0.9	2.63548	1.32	36	18	0	0	0	0	0	0	0	antisense
FLNA	10	141	11	8.41071	0.82	8.96294	0.81	100	7.5	0	0	9	0	1	0	0	coding
FLOT1	2	35	17	1.61184	0.81	1.99123	1	25	12.5	2	0	0	0	0	0	0	5'utr
FLOT2	1	11	11	0.909091	0.91	1	1	11	11	1	0	0	0	0	0	0	5'utr
FLT1	3	68	19	2.51813	0.85	3.26423	1.18	52	15	2	0	0	0	1	0	0	start_codon
FLVCR1	1	20	20	0.85	0.85	0.929419	0.93	17	17	1	0	0	0	0	0	0	5'utr
FLYWCH1	2	48	24	1.81212	0.91	2.60853	1.3	44	22	1	0	0	1	0	0	0	5'utr
FLYWCH2	1	7	7	1	1	0.845098	0.85	5	5	1	0	0	0	0	0	0	5'utr
FMNL1	3	211	71	2.65487	0.87	3.05843	1.04	129	47	2	0	0	1	0	0	0	5'utr
FMNL3	1	13	13	1	1	1.11394	1.11	8	8	1	0	0	0	0	0	0	5'utr
FMR1	1	7	7	1	1	0.845098	0.85	6	6	0	0	0	0	1	0	0	start_codon
FNBP1	2	61	30	1.47009	0.74	1.70243	0.85	47	23.5	1	0	0	0	1	0	0	start_codon
FOSL2	1	11	11	0.818182	0.82	0.653213	0.65	11	11	1	0	0	0	0	0	0	5'utr
FOXJ2	5	73	12	4.26058	0.89	4.90827	1.04	58	10	5	0	0	0	0	0	0	5'utr
FOXJ3	2	47	23	1.7904	0.9	2.19728	1.1	34	17	2	0	0	0	0	0	0	5'utr
FOXK1	17	244	11	14.7378	0.88	16.2793	0.9	225	10	0	0	4	13	0	0	0	coding
FOXK2	6	160	21	4.88475	0.8	5.91322	0.93	104	18.5	2	0	1	1	1	0	0	5'utr
FOXM1	1	8	8	1	1	0.90309	0.9	6	6	0	0	0	1	0	0	0	3'utr
FOXN3	1	18	18	0.888889	0.89	1.20412	1.2	7	7	1	0	0	0	0	0	0	5'utr
FOXO3	5	58	11	4.41447	1	4.61106	0.95	54	9	3	0	2	0	0	0	0	5'utr
FOXP4	1	15	15	0.866667	0.87	0.812913	0.81	14	14	1	0	0	0	0	0	0	5'utr
FOXRED2	3	32	9	2.58929	0.88	2.32222	0.7	27	6	2	0	0	0	0	0	0	5'utr
FP236383.10	1	18	18	0.611111	0.61	0.740363	0.74	9	9	0	0	0	0	0	0	0	miRNA
FRA10AC1	2	62	31	1.95918	0.98	2.78604	1.39	45	22.5	1	0	0	0	0	0	0	5'utr-intron
FRAT1	1	15	15	0.866667	0.87	0.812913	0.81	11	11	1	0	0	0	0	0	0	5'utr
FRAT2	1	8	8	1	1	0.90309	0.9	7	7	0	0	1	0	0	0	0	coding
FRG1	1	26	26	0.846154	0.85	1.04139	1.04	25	25	1	0	0	0	0	0	0	5'utr
FRG1B	1	8	8	0.625	0.63	0.69897	0.7	6	6	1	0	0	0	0	0	0	5'utr
FRMD5	1	15	15	0.866667	0.87	1.11394	1.11	14	14	0	1	0	0	0	0	0	intron
FRMD8	8	140	11	7.14761	0.92	8.15599	0.93	108	10.5	1	0	0	6	0	1	0	5'utr
FRS3	1	8	8	0.625	0.63	0.69897	0.7	6	6	1	0	0	0	0	0	0	5'utr
FSD1L	2	21	10	1.92308	0.96	1.62325	0.81	18	9	1	1	0	0	0	0	0	5'utr
FTH1	1	170	170	0.817647	0.82	1.66589	1.67	86	86	0	0	0	0	0	0	0	5'utr-intron
FTH1P10	2	55	27	1.69345	0.85	2.07004	1.04	12	6	0	0	0	0	0	0	0	processed_transcript
FTL	2	29	14	1.85714	0.93	1.95424	0.98	23	11.5	2	0	0	0	0	0	0	5'utr
FTSJ1	1	14	14	0.928571	0.93	1.11394	1.11	11	11	1	0	0	0	0	0	0	5'utr
FTSJ2	1	7	7	1	1	0.845098	0.85	6	6	0	1	0	0	0	0	0	intron
FTX	1	8	8	1	1	0.90309	0.9	8	8	0	0	0	0	0	0	0	lincRNA_exon
FUBP3	1	35	35	0.771429	0.77	1.43136	1.43	23	23	0	0	0	0	1	0	0	start_codon
FURIN	3	31	8	2.875	1	2.89432	0.85	30	8	0	0	0	3	0	0	0	3'utr
FUS	5	102	11	3.58333	0.71	4.5611	0.85	83	11	0	0	5	0	0	0	0	coding
FUT4	2	20	10	1.68687	0.84	1.54407	0.77	18	9	0	0	2	0	0	0	0	coding
FUZ	1	11	11	0.909091	0.91	1	1	6	6	0	0	1	0	0	0	0	coding
FXR2	1	11	11	0.818182	0.82	0.954243	0.95	10	10	0	0	0	0	1	0	0	start_codon
FXYD5	3	30	9	2.73504	0.89	2.54654	0.9	22	6	3	0	0	0	0	0	0	5'utr
FYB	1	7	7	0.714286	0.71	0.69897	0.7	7	7	0	0	0	0	1	0	0	start_codon
FYN	5	495	102	3.80647	0.75	5.01165	1.04	255	56	5	0	0	0	0	0	0	5'utr
FZD1	3	27	8	2.79167	0.92	2.43056	0.85	18	7	1	0	1	1	0	0	0	5'utr
FZD2	2	18	9	1.4026	0.7	1.5563	0.78	16	8	2	0	0	0	0	0	0	5'utr
FZR1	5	89	13	3.52524	0.79	4.57334	0.9	73	13	2	0	0	3	0	0	0	5'utr
G2E3	1	21	21	0.857143	0.86	0.778151	0.78	17	17	1	0	0	0	0	0	0	5'utr
G3BP1	4	75	14	3.70866	0.92	4.42357	1.04	53	13	1	0	2	0	0	0	0	5'utr
G3BP2	1	88	88	0.875	0.88	1.40937	1.41	65	65	1	0	0	0	0	0	0	5'utr
G6PC3	1	13	13	0.846154	0.85	0.740363	0.74	8	8	0	0	0	0	1	0	0	start_codon
GABARAP	2	23	11	1.91667	0.96	2.08279	1.04	17	8.5	1	0	0	0	1	0	0	start_codon
GABARAPL1	1	31	31	0.806452	0.81	0.920819	0.92	22	22	0	0	0	0	0	0	0	intron-5'utr
GABARAPL2	1	68	68	0.720588	0.72	0.787106	0.79	56	56	0	0	0	0	1	0	0	start_codon
GABPA	1	11	11	0.909091	0.91	0.69897	0.7	11	11	1	0	0	0	0	0	0	5'utr
GABPB1	4	48	11	3.55159	0.9	3.63185	0.81	43	10.5	1	3	0	0	0	0	0	intron
GABRB3	1	7	7	0.714286	0.71	0.69897	0.7	7	7	1	0	0	0	0	0	0	5'utr
GADD45A	2	18	9	1.85714	0.93	1.81954	0.91	15	7.5	2	0	0	0	0	0	0	5'utr
GADD45GIP1	1	17	17	0.882353	0.88	0.875061	0.88	13	13	0	0	1	0	0	0	0	coding
GAK	2	16	8	1.85714	0.93	1.73239	0.87	16	8	1	0	1	0	0	0	0	coding
GALNS	1	13	13	0.923077	0.92	1.07918	1.08	3	3	0	1	0	0	0	0	0	intron
GALNT11	2	30	15	1.8	0.9	1.65801	0.83	23	11.5	2	0	0	0	0	0	0	5'utr
GALNT2	2	18	9	1.77778	0.89	1.79934	0.9	16	8	0	0	1	0	1	0	0	start_codon
GAN	1	8	8	1	1	0.90309	0.9	7	7	0	0	0	0	1	0	0	start_codon
GANAB	1	7	7	0.714286	0.71	0.69897	0.7	7	7	0	0	0	0	1	0	0	start_codon
GAPDH	4	144	37	3.02231	0.75	3.70596	0.91	100	24.5	1	0	1	1	1	0	0	5'utr
GAPDHP1	1	12	12	0.916667	0.92	1.04139	1.04	10	10	0	0	0	0	0	0	0	processed_pseudogene
GAPDHP65	1	17	17	0.941176	0.94	1.20412	1.2	14	14	0	0	0	0	0	0	0	processed_pseudogene
GAPDHP70	1	14	14	0.428571	0.43	0.778151	0.78	8	8	0	0	0	0	0	0	0	processed_pseudogene
GAR1	6	245	37	4.32103	0.73	6.97536	1.15	199	29.5	2	0	3	0	1	0	0	5'utr
GAREM	1	24	24	0.958333	0.96	1.36173	1.36	12	12	0	1	0	0	0	0	0	intron
GARS	2	31	15	1.52564	0.76	1.52827	0.76	29	14.5	0	0	2	0	0	0	0	coding
GART	1	12	12	0.666667	0.67	0.90309	0.9	11	11	0	0	0	0	1	0	0	start_codon
GAS2L1	4	53	14	3.58095	0.9	3.79216	1.02	47	12	1	0	2	0	1	0	0	5'utr
GAS7	4	69	16	3.65641	0.91	4.35564	1.04	51	11	2	0	2	0	0	0	0	coding
GATA3	3	87	17	2.66452	0.88	2.64345	0.9	46	15	3	0	0	0	0	0	0	5'utr
GATAD2A	8	147	16	6.50503	0.89	7.60552	0.95	118	13.5	2	2	1	3	0	0	0	5'utr
GATS	1	12	12	0.75	0.75	0.954243	0.95	12	12	0	0	0	0	0	0	0	nonsense_mediated_decay
GATSL2	2	54	27	1.45032	0.73	2.08814	1.04	45	22.5	2	0	0	0	0	0	0	5'utr
GBA2	1	10	10	0.7	0.7	0.845098	0.85	10	10	1	0	0	0	0	0	0	5'utr
GBP1	1	21	21	0.857143	0.86	1.25527	1.26	21	21	1	0	0	0	0	0	0	5'utr
GBP2	1	31	31	0.933333	0.93	1.14613	1.15	23	23	1	0	0	0	0	0	0	5'utr
GBP3	1	42	42	0.619048	0.62	0.937852	0.94	39	39	1	0	0	0	0	0	0	5'utr
GCC1	3	35	12	2.43651	0.83	2.60206	1	29	11	3	0	0	0	0	0	0	5'utr
GCH1	1	10	10	0.9	0.9	0.954243	0.95	8	8	1	0	0	0	0	0	0	5'utr
GCLC	2	36	18	1.88854	0.94	2.15836	1.08	24	12	2	0	0	0	0	0	0	5'utr
GCLM	2	94	47	1.39901	0.7	1.85733	0.93	74	37	1	0	0	0	1	0	0	start_codon
GCNT1	1	8	8	0.75	0.75	0.778151	0.78	8	8	1	0	0	0	0	0	0	5'utr
GDE1	2	73	36	1.91609	0.96	2.902	1.45	42	21	1	0	0	0	1	0	0	start_codon
GDI1	1	19	19	0.736842	0.74	0.669007	0.67	16	16	0	0	0	0	1	0	0	start_codon
GDI2	2	46	23	1.76876	0.88	2.10721	1.05	42	21	1	0	0	0	1	0	0	start_codon
GET4	2	38	19	2	1	2.52634	1.26	30	15	0	0	0	1	1	0	0	start_codon
GFER	2	15	7	1.73214	0.87	1.62325	0.81	13	6.5	0	0	2	0	0	0	0	coding
GFI1	1	8	8	1	1	0.90309	0.9	7	7	0	1	0	0	0	0	0	intron
GFM2	1	7	7	1	1	0.845098	0.85	4	4	1	0	0	0	0	0	0	5'utr
GFOD1	10	300	16	8.55324	0.87	9.42871	0.96	238	15	6	0	3	1	0	0	0	3'utr
GFOD2	2	30	15	1.64593	0.82	2.14613	1.07	26	13	1	0	0	0	1	0	0	start_codon
GGCT	1	11	11	1	1	1.04139	1.04	8	8	1	0	0	0	0	0	0	5'utr
GGNBP2	1	22	22	0.954545	0.95	1.32222	1.32	19	19	0	0	0	0	1	0	0	start_codon
GGPS1	1	21	21	0.952381	0.95	1.30103	1.3	16	16	1	0	0	0	0	0	0	5'utr
GHITM	1	24	24	0.916667	0.92	1.04139	1.04	14	14	1	0	0	0	0	0	0	5'utr
GID4	1	7	7	1	1	0.845098	0.85	4	4	0	0	1	0	0	0	0	coding
GID8	3	101	8	2.5461	0.86	2.86629	0.85	35	7	1	0	0	2	0	0	0	5'utr
GIGYF2	1	16	16	0.875	0.88	0.845098	0.85	14	14	0	0	0	0	0	0	0	5'utr-intron
GIMAP6	2	14	7	1.42857	0.71	1.39794	0.7	14	7	1	0	0	1	0	0	0	3'utr
GIMAP7	1	11	11	0.636364	0.64	0.845098	0.85	11	11	0	0	0	0	1	0	0	start_codon
GINS1	1	9	9	0.777778	0.78	0.845098	0.85	9	9	1	0	0	0	0	0	0	5'utr
GINS3	1	8	8	0.75	0.75	0.778151	0.78	8	8	1	0	0	0	0	0	0	5'utr
GIT1	3	115	36	2.42762	0.79	3.03149	1.05	84	20	1	0	0	1	1	0	0	3'utr
GJC1	1	13	13	0.692308	0.69	0.653213	0.65	12	12	1	0	0	0	0	0	0	5'utr
GLB1L3	1	7	7	1	1	0.845098	0.85	7	7	1	0	0	0	0	0	0	5'utr
GLO1	1	7	7	0.857143	0.86	0.778151	0.78	6	6	0	0	0	0	1	0	0	start_codon
GLRX5	4	150	38	3.22097	0.8	4.7893	1.22	123	29	0	0	3	0	1	0	0	start_codon
GLS	4	137	19	2.75588	0.75	3.94002	1.06	94	12.5	2	0	1	0	1	0	0	5'utr
GLT8D1	3	90	36	2.40202	0.84	3.12651	1.09	71	31	2	0	0	0	0	0	0	5'utr
GLUD1	1	9	9	0.777778	0.78	0.845098	0.85	8	8	0	0	1	0	0	0	0	coding
GLUD1P3	1	10	10	1	1	1	1	9	9	0	0	0	0	0	0	0	processed_transcript
GLUL	1	9	9	0.777778	0.78	0.845098	0.85	5	5	1	0	0	0	0	0	0	5'utr
GMCL1	1	38	38	0.947368	0.95	1.25527	1.26	22	22	1	0	0	0	0	0	0	5'utr
GMEB2	1	7	7	0.857143	0.86	0.778151	0.78	6	6	0	0	1	0	0	0	0	coding
GMFG	1	23	23	0.826087	0.83	0.977724	0.98	22	22	1	0	0	0	0	0	0	5'utr
GMNN	5	95	13	4.37063	0.88	4.89556	1.08	67	13	3	0	1	0	0	0	0	5'utr
GMPPA	1	12	12	1	1	1.07918	1.08	11	11	0	0	0	0	0	0	0	5'utr-intron
GMPPB	3	50	15	2.65185	0.85	3.04297	0.9	37	8	1	0	0	1	0	0	0	3'utr
GMPS	2	20	10	1.79798	0.9	1.90309	0.95	19	9.5	2	0	0	0	0	0	0	5'utr
GNA12	4	89	15	3.46689	0.86	3.7168	0.89	73	13.5	0	0	1	2	1	0	0	3'utr
GNA13	2	56	28	1.94595	0.97	2.52179	1.26	38	19	1	0	0	0	1	0	0	start_codon
GNA15	9	165	15	7.10052	0.8	8.77739	1.04	121	14	3	0	0	5	1	0	0	5'utr
GNAI2	1	140	140	0.792857	0.79	1.20022	1.2	87	87	0	0	0	0	1	0	0	start_codon
GNAQ	1	56	56	0.821429	0.82	1.66276	1.66	44	44	1	0	0	0	0	0	0	5'utr
GNAS	8	667	19	6.17591	0.81	7.67312	0.95	420	16	1	5	1	0	1	0	0	intron
GNB1	2	80	40	1.86797	0.93	2.30428	1.15	50	25	2	0	0	0	0	0	0	5'utr
GNB1L	1	7	7	1	1	0.845098	0.85	7	7	1	0	0	0	0	0	0	5'utr
GNB2	2	22	11	1.47009	0.74	1.49831	0.75	21	10.5	1	0	0	1	0	0	0	5'utr
GNB2L1	2	97	48	1.69522	0.85	2.10636	1.05	72	36	0	0	1	0	1	0	0	coding
GNG2	3	59	17	2.65714	0.86	2.97864	0.97	46	10	3	0	0	0	0	0	0	5'utr
GNG4	2	22	11	1.50427	0.75	1.50515	0.75	17	8.5	2	0	0	0	0	0	0	5'utr
GNG5	3	106	34	2.54669	0.85	4.42524	1.46	66	25	1	0	1	0	1	0	0	coding
GNL1	4	188	9	3.41386	0.83	4.01524	0.9	103	8.5	2	0	1	0	1	0	0	coding
GNL2	1	18	18	1	1	1.25527	1.26	12	12	0	0	0	0	0	0	0	processed_transcript
GNL3L	1	8	8	0.875	0.88	0.845098	0.85	8	8	0	0	0	0	0	0	0	5'utr-intron
GNPNAT1	1	21	21	0.904762	0.9	1.27875	1.28	19	19	1	0	0	0	0	0	0	5'utr
GOLGA2	1	8	8	0.5	0.5	0.60206	0.6	7	7	0	0	1	0	0	0	0	coding
GOLGA2P10	1	11	11	1	1	1.04139	1.04	3	3	0	0	0	0	0	0	0	processed_transcript
GOLGA3	2	19	9	1.4881	0.74	1.34242	0.67	17	8.5	2	0	0	0	0	0	0	5'utr
GOLGA7B	1	20	20	0.2	0.2	0.60206	0.6	7	7	0	0	0	1	0	0	0	3'utr
GOLPH3	4	70	13	3.41795	0.83	3.27646	0.75	55	9	3	0	1	0	0	0	0	coding
GOLPH3L	1	34	34	0.882353	0.88	1.47712	1.48	31	31	0	0	0	0	0	0	0	processed_transcript
GOPC	2	52	26	1.625	0.81	2.32222	1.16	46	23	2	0	0	0	0	0	0	5'utr
GORAB	1	8	8	1	1	0.90309	0.9	7	7	0	0	0	0	1	0	0	start_codon
GORASP2	2	35	17	1.95238	0.98	2.14613	1.07	26	13	1	0	1	0	0	0	0	5'utr
GOT2	1	9	9	1	1	0.954243	0.95	9	9	1	0	0	0	0	0	0	5'utr
GP1BB	7	99	12	6.064	0.95	6.58838	0.93	75	8	1	1	3	2	0	0	0	5'utr
GPAA1	1	19	19	0.789474	0.79	0.875061	0.88	17	17	0	0	0	0	1	0	0	start_codon
GPANK1	1	10	10	0.9	0.9	0.954243	0.95	9	9	1	0	0	0	0	0	0	5'utr
GPBP1	7	107	11	5.3416	0.72	6.17431	0.78	85	11	6	0	1	0	0	0	0	5'utr
GPBP1L1	4	62	11	3.02953	0.71	3.61448	0.85	61	11	4	0	0	0	0	0	0	5'utr
GPHN	1	8	8	0.875	0.88	0.845098	0.85	8	8	1	0	0	0	0	0	0	5'utr
GPN2	3	45	7	2.74194	1	2.35295	0.85	36	6	1	0	2	0	0	0	0	coding
GPR108	1	9	9	0.777778	0.78	0.845098	0.85	8	8	0	0	0	0	0	0	0	coding-intron
GPR125	1	14	14	0.928571	0.93	1.11394	1.11	9	9	1	0	0	0	0	0	0	5'utr
GPR137	9	124	10	7.56882	0.88	7.66147	0.85	109	10	4	4	1	0	0	0	0	5'utr
GPR89B	1	9	9	1	1	0.954243	0.95	2	2	1	0	0	0	0	0	0	5'utr
GPS2	1	16	16	0.875	0.88	1.14613	1.15	14	14	1	0	0	0	0	0	0	5'utr
GPSM1	1	7	7	0.857143	0.86	0.778151	0.78	7	7	1	0	0	0	0	0	0	5'utr
GPSM3	2	20	10	1.58333	0.79	1.47712	0.74	18	9	1	0	1	0	0	0	0	coding
GPX1	4	69	13	3.163	0.8	3.1383	0.72	49	11	1	0	1	0	1	0	0	coding-intron
GPX1P1	1	7	7	0.714286	0.71	0.69897	0.7	6	6	0	0	0	0	0	0	0	processed_pseudogene
GPX1P2	1	9	9	0.888889	0.89	0.90309	0.9	6	6	0	0	0	0	0	0	0	processed_pseudogene
GPX4	1	15	15	0.933333	0.93	1.14613	1.15	4	4	0	0	0	0	0	0	0	coding-intron
GRAMD1A	1	14	14	0.928571	0.93	0.812913	0.81	11	11	1	0	0	0	0	0	0	5'utr
GRAMD1C	3	53	11	2.261	0.81	2.89625	0.85	29	8	0	3	0	0	0	0	0	intron
GRAMD3	1	7	7	0.857143	0.86	0.778151	0.78	7	7	1	0	0	0	0	0	0	5'utr
GRAMD4	13	163	11	11.5387	0.88	11.8757	0.9	144	11	0	0	0	12	0	1	0	stop_codon
GRAP2	2	21	10	1.81818	0.91	1.95424	0.98	16	8	2	0	0	0	0	0	0	5'utr
GRB2	5	313	10	4.48338	0.9	5.52753	0.95	183	8	2	0	0	2	1	0	0	3'utr
GRHPR	1	7	7	1	1	0.845098	0.85	7	7	0	0	0	0	1	0	0	start_codon
GRID2	1	32	32	0.875	0.88	0.970037	0.97	9	9	0	1	0	0	0	0	0	intron
GRINA	2	21	10	2	1	2.01703	1.01	18	9	1	0	0	0	0	0	0	5'utr
GRK4	1	7	7	0.857143	0.86	0.778151	0.78	6	6	1	0	0	0	0	0	0	5'utr
GRK5	1	9	9	0.777778	0.78	0.845098	0.85	9	9	1	0	0	0	0	0	0	5'utr
GRK6	1	9	9	0.888889	0.89	0.90309	0.9	8	8	1	0	0	0	0	0	0	5'utr
GRPEL2	1	44	44	0.954545	0.95	1.14613	1.15	27	27	0	0	1	0	0	0	0	coding
GRSF1	2	50	25	1.6381	0.82	2.24428	1.12	44	22	0	0	1	0	1	0	0	coding
GRWD1	1	12	12	0.833333	0.83	0.69897	0.7	12	12	0	0	0	1	0	0	0	3'utr
GSG2	2	42	21	2	1	2.43457	1.22	16	8	0	0	1	0	1	0	0	start_codon
GSK3A	2	72	36	1.69362	0.85	2.32222	1.16	43	21.5	0	0	1	0	0	0	0	coding
GSK3B	4	81	13	3.54304	0.89	4.2667	1.06	60	12.5	4	0	0	0	0	0	0	5'utr
GSKIP	1	13	13	0.846154	0.85	1.04139	1.04	10	10	1	0	0	0	0	0	0	5'utr
GSPT1	4	185	15	3.02177	0.79	3.47879	0.91	142	14	0	3	1	0	0	0	0	intron
GSTO1	1	16	16	1	1	1.20412	1.2	9	9	0	0	0	0	1	0	0	start_codon
GSTP1	3	61	22	2.51439	0.87	2.88846	0.81	55	20	1	0	2	0	0	0	0	5'utr
GTF2A1	1	11	11	0.909091	0.91	1	1	6	6	1	0	0	0	0	0	0	5'utr
GTF2A2	1	79	79	0.835443	0.84	1.21748	1.22	66	66	1	0	0	0	0	0	0	5'utr
GTF2B	1	10	10	0.9	0.9	0.954243	0.95	8	8	1	0	0	0	0	0	0	5'utr
GTF2E2	2	38	19	1.68421	0.84	2.4014	1.2	25	12.5	2	0	0	0	0	0	0	5'utr
GTF2F1	2	17	8	1.75714	0.88	1.73239	0.87	15	7.5	2	0	0	0	0	0	0	5'utr
GTF2H2	1	9	9	0.888889	0.89	0.90309	0.9	9	9	1	0	0	0	0	0	0	5'utr
GTF2H4	1	9	9	0.777778	0.78	0.845098	0.85	8	8	0	0	0	1	0	0	0	3'utr
GTF2I	2	26	13	1.84615	0.92	2.15836	1.08	19	9.5	2	0	0	0	0	0	0	5'utr
GTF2IP1	2	72	36	1.82712	0.91	2.14613	1.07	39	19.5	0	0	0	0	0	0	0	processed_transcript
GTF3A	3	49	18	2.63345	0.88	3.04922	0.9	41	16	0	0	1	0	0	0	0	coding-intron
GTF3C4	2	59	29	1.69377	0.85	2.12057	1.06	31	15.5	1	0	1	0	0	0	0	5'utr
GTF3C5	1	18	18	0.722222	0.72	1.11394	1.11	12	12	0	0	1	0	0	0	0	coding
GTPBP2	1	11	11	0.909091	0.91	1	1	8	8	0	0	1	0	0	0	0	coding
GTPBP3	1	35	35	0.885714	0.89	1.19033	1.19	21	21	0	0	1	0	0	0	0	coding
GTPBP6	2	17	8	1.8	0.9	1.74819	0.87	17	8.5	0	0	2	0	0	0	0	coding
GTSE1	4	68	19	3.38923	0.9	3.69827	0.86	59	15.5	0	2	0	2	0	0	0	intron
GUCA1B	1	8	8	0.875	0.88	0.845098	0.85	8	8	0	0	0	1	0	0	0	3'utr
GUF1	3	29	8	2.01923	0.75	2.38021	0.78	27	8	2	0	0	0	1	0	0	5'utr
GUK1	2	55	27	1.64538	0.82	1.9147	0.96	45	22.5	0	0	0	0	2	0	0	start_codon
GXYLT2	1	42	42	0.547619	0.55	1.0607	1.06	31	31	0	1	0	0	0	0	0	intron
GYPC	1	20	20	0.95	0.95	0.977724	0.98	15	15	1	0	0	0	0	0	0	5'utr
GZMA	1	22	22	0.681818	0.68	0.875061	0.88	22	22	0	0	0	0	1	0	0	start_codon
H1F0	2	46	23	1.24942	0.62	1.716	0.86	23	11.5	1	0	0	1	0	0	0	5'utr
H1FX	10	1575	76	8.39909	0.83	11.6933	1.24	825	45	2	0	3	5	0	0	0	3'utr
H2AFV	1	136	136	0.845588	0.85	1.45864	1.46	85	85	1	0	0	0	0	0	0	5'utr
H2AFX	9	626	14	8.14978	0.88	10.8518	1.15	425	13	1	0	1	6	1	0	0	3'utr
H2AFY	1	8	8	0.875	0.88	0.845098	0.85	8	8	0	0	1	0	0	0	0	coding
H2AFZ	2	142	71	1.6137	0.81	1.94331	0.97	117	58.5	1	0	0	0	0	0	0	intron-coding
H2BFS	2	34	17	1.38667	0.69	1.43136	0.72	25	12.5	0	0	1	0	1	0	0	start_codon
H3F3A	1	23	23	0.652174	0.65	1.17609	1.18	16	16	0	0	0	0	0	0	0	intron-5'utr
H3F3B	3	207	28	2.38651	0.79	3.13761	1.04	122	21	1	0	1	1	0	0	0	3'utr
H3F3C	2	96	48	1.61525	0.81	2.54531	1.27	54	27	1	0	0	0	1	0	0	start_codon
H6PD	1	13	13	0.923077	0.92	1.07918	1.08	10	10	1	0	0	0	0	0	0	5'utr
HABP4	1	8	8	0.875	0.88	0.845098	0.85	6	6	1	0	0	0	0	0	0	5'utr
HAR1A	4	77	17	3.66118	0.93	4.071	0.98	39	9	0	0	0	0	0	0	0	lincRNA_exon
HAUS2	1	7	7	1	1	0.845098	0.85	7	7	0	0	1	0	0	0	0	coding
HAUS3	2	53	26	1.71138	0.86	2.07918	1.04	41	20.5	1	1	0	0	0	0	0	5'utr
HAUS4	1	7	7	0.857143	0.86	0.778151	0.78	7	7	1	0	0	0	0	0	0	5'utr
HAX1	1	34	34	0.794118	0.79	0.829304	0.83	30	30	1	0	0	0	0	0	0	5'utr
HBEGF	2	22	11	1.66071	0.83	1.58546	0.79	19	9.5	2	0	0	0	0	0	0	5'utr
HCCS	1	12	12	0.833333	0.83	1	1	11	11	0	0	0	0	0	0	0	5'utr-intron
HCFC1	15	362	11	12.8789	0.88	14.25	0.95	304	10	7	0	4	4	0	0	0	3'utr
HCG18	1	18	18	1	1	1.25527	1.26	11	11	0	0	0	0	0	0	0	antisense
HCLS1	1	7	7	0.857143	0.86	0.778151	0.78	7	7	1	0	0	0	0	0	0	5'utr
HDAC1	1	16	16	0.9375	0.94	1.17609	1.18	13	13	0	0	0	0	1	0	0	start_codon
HDAC2	2	188	94	1.60542	0.8	2.11059	1.06	116	58	2	0	0	0	0	0	0	5'utr
HDAC7	3	31	11	2.7033	0.86	2.55991	0.78	25	8	1	0	1	1	0	0	0	3'utr
HDDC2	1	11	11	0.909091	0.91	1	1	11	11	0	0	0	0	0	0	0	processed_transcript
HDDC3	1	8	8	1	1	0.90309	0.9	5	5	0	0	0	0	0	0	0	coding-intron
HDGF	11	512	11	9.54756	0.83	10.9606	0.9	279	10	2	1	2	5	0	0	0	3'utr
HDGFRP3	3	76	15	2.62177	0.87	3.15927	1.08	60	14	2	0	0	0	1	0	0	start_codon
HDHD3	2	26	13	2	1	2.20412	1.1	13	6.5	1	0	1	0	0	0	0	coding
HEATR2	2	21	10	1.80909	0.9	1.35218	0.68	16	8	0	0	2	0	0	0	0	coding
HEBP2	2	126	63	1.77303	0.89	2.96031	1.48	87	43.5	2	0	0	0	0	0	0	5'utr
HECA	4	47	9	3.80952	1	3.66101	0.89	39	8	4	0	0	0	0	0	0	5'utr
HECTD1	3	30	10	2.50833	0.83	2.74819	0.9	25	8	3	0	0	0	0	0	0	5'utr
HELQ	1	9	9	0.888889	0.89	0.90309	0.9	9	9	1	0	0	0	0	0	0	5'utr
HELZ2	5	45	8	4.37103	0.88	4.1174	0.78	33	6	0	0	4	1	0	0	0	3'utr
HERC4	1	8	8	1	1	0.90309	0.9	7	7	1	0	0	0	0	0	0	5'utr
HERPUD2	1	15	15	0.866667	0.87	1.11394	1.11	14	14	1	0	0	0	0	0	0	5'utr
HES4	6	119	17	5.03843	0.88	5.91442	0.93	97	15.5	1	0	4	0	0	1	0	stop_codon
HEXIM1	5	184	30	4.05032	0.83	5.00939	1.09	165	29	4	0	1	0	0	0	0	5'utr
HGNC:9982	1	14	14	1	1	1.14613	1.15	3	3	0	0	0	0	0	0	0	retained_intron
HGS	1	7	7	0.857143	0.86	0.778151	0.78	7	7	0	0	0	0	1	0	0	start_codon
HHIP	1	7	7	0.714286	0.71	0.69897	0.7	7	7	1	0	0	0	0	0	0	5'utr
HHIP-AS1	1	30	30	0.766667	0.77	1.0607	1.06	22	22	0	0	0	0	0	0	0	antisense
HIATL1	3	105	24	2.77854	0.95	3.44091	1	64	18	3	0	0	0	0	0	0	5'utr
HIATL2	3	40	9	2.73214	0.88	2.75358	0.95	25	7	2	0	0	0	1	0	0	start_codon
HIC1	3	26	9	2.75714	0.9	2.68664	0.95	23	7	0	0	2	1	0	0	0	coding
HIC2	1	12	12	0.916667	0.92	1.04139	1.04	10	10	1	0	0	0	0	0	0	5'utr
HIF1A	2	31	15	1.85909	0.93	2.27875	1.14	27	13.5	1	0	0	0	0	0	0	processed_transcript
HIGD2A	1	23	23	0.913043	0.91	1.32222	1.32	21	21	0	0	0	0	1	0	0	start_codon
HILPDA	1	9	9	1	1	0.954243	0.95	6	6	0	0	0	0	0	0	0	5'utr-intron
HINT1	2	164	82	1.77716	0.89	2.98677	1.49	76	38	1	0	1	0	0	0	0	coding
HINT1P1	1	33	33	0.787879	0.79	0.812913	0.81	15	15	0	0	0	0	0	0	0	processed_pseudogene
HINT2	1	12	12	0.916667	0.92	1.04139	1.04	8	8	0	0	1	0	0	0	0	coding
HIPK1	3	76	25	2.01727	0.65	2.74403	0.9	70	25	1	1	0	1	0	0	0	intron
HIPK3	1	9	9	1	1	0.954243	0.95	5	5	1	0	0	0	0	0	0	5'utr
HIRIP3	2	22	11	1.85714	0.93	1.98227	0.99	16	8	2	0	0	0	0	0	0	5'utr
HIST1H1B	7	302	19	5.98386	0.89	6.48715	0.95	206	16	0	0	5	0	1	1	0	stop_codon
HIST1H1C	6	269	22	4.69539	0.8	5.81335	1.07	205	19.5	0	0	5	0	1	0	0	coding
HIST1H1D	7	316	17	5.72241	0.83	6.98482	1.15	200	16	0	0	5	0	1	1	0	stop_codon
HIST1H1E	3	304	21	2.60055	0.86	3.56375	1.11	223	14	0	0	2	0	1	0	0	start_codon
HIST1H2AB	2	102	51	1.45341	0.73	2.47567	1.24	52	26	0	0	1	0	1	0	0	coding
HIST1H2AC	1	996	996	0.86747	0.87	1.5563	1.56	390	390	0	0	0	0	0	1	0	stop_codon
HIST1H2AD	4	182	31	3.24472	0.84	3.67502	0.92	145	24.5	0	0	3	0	1	0	0	coding
HIST1H2AE	3	166	36	2.35381	0.78	3.64998	1.1	142	29	0	0	2	0	1	0	0	start_codon
HIST1H2AG	2	373	186	1.53168	0.77	2.24613	1.12	207	103.5	0	0	0	0	1	1	0	start_codon
HIST1H2AH	3	76	27	2.40087	0.85	2.93576	1.06	61	23	0	0	2	0	1	0	0	start_codon
HIST1H2AI	3	273	109	2.5101	0.84	3.09755	1.12	174	65	0	0	2	0	1	0	0	start_codon
HIST1H2AJ	4	176	11	3.49115	0.86	3.5361	0.92	102	9.5	0	0	3	0	1	0	0	coding
HIST1H2AK	2	20	10	1.63736	0.82	1.47712	0.74	17	8.5	0	0	1	0	0	1	0	stop_codon
HIST1H2AL	2	28	14	1.35556	0.68	1.90309	0.95	22	11	0	0	2	0	0	0	0	coding
HIST1H2AM	6	387	27	5.01465	0.83	5.65486	0.94	128	18	0	0	4	0	1	1	0	stop_codon
HIST1H2APS1	1	18	18	0.5	0.5	0.653213	0.65	12	12	0	0	0	0	0	0	0	processed_pseudogene
HIST1H2BC	2	78	39	1.46266	0.73	1.6163	0.81	58	29	0	0	1	0	1	0	0	coding
HIST1H2BD	3	199	47	2.19353	0.68	3.35752	0.95	150	22	0	0	2	0	1	0	0	start_codon
HIST1H2BE	1	14	14	0.857143	0.86	0.778151	0.78	9	9	0	0	1	0	0	0	0	coding
HIST1H2BF	4	121	18	3.29304	0.85	3.76485	0.83	95	11.5	0	0	3	0	1	0	0	start_codon
HIST1H2BG	1	31	31	0.806452	0.81	1.39794	1.4	31	31	0	0	0	0	1	0	0	start_codon
HIST1H2BI	3	199	19	2.52887	0.81	2.88977	0.88	138	16	0	0	2	0	1	0	0	start_codon
HIST1H2BJ	4	190	29	3.27826	0.78	4.31151	0.97	161	25	0	0	2	0	1	1	0	stop_codon
HIST1H2BK	3	128	8	2.4842	0.77	2.93952	0.9	94	6	0	0	2	0	1	0	0	coding
HIST1H2BL	2	56	28	1.76957	0.88	2.07918	1.04	28	14	0	0	2	0	0	0	0	coding
HIST1H2BM	1	11	11	0.363636	0.36	0.60206	0.6	10	10	0	0	0	0	1	0	0	start_codon
HIST1H2BN	2	46	23	1.22711	0.61	1.69897	0.85	40	20	0	0	1	0	1	0	0	start_codon
HIST1H2BO	3	100	10	2.37012	0.8	2.80509	0.9	81	7	0	0	2	0	1	0	0	start_codon
HIST1H2BPS3	2	24	12	1.64706	0.82	1.58546	0.79	12	6	0	0	0	0	0	0	0	processed_pseudogene
HIST1H3A	2	67	33	1.56667	0.78	1.93197	0.97	21	10.5	0	0	1	0	1	0	0	start_codon
HIST1H3B	3	366	153	2.58913	0.89	4.08038	1.23	192	68	0	0	1	0	1	1	0	stop_codon
HIST1H3C	3	43	12	2.59211	0.84	2.93651	1.08	31	10	0	0	3	0	0	0	0	coding
HIST1H3D	2	228	114	1.42394	0.71	2.43159	1.22	177	88.5	0	0	1	0	1	0	0	coding
HIST1H3E	1	10	10	0.8	0.8	0.60206	0.6	7	7	0	0	1	0	0	0	0	coding
HIST1H3F	4	290	70	3.08553	0.8	3.9747	0.97	186	44	0	0	2	0	1	1	0	stop_codon
HIST1H3G	3	177	45	2.4827	0.88	3.97934	1.34	139	40	0	0	1	0	1	1	0	stop_codon
HIST1H3H	3	341	68	2.35869	0.76	2.46835	0.81	187	58	0	0	1	0	1	1	0	start_codon
HIST1H3I	2	59	29	1.82353	0.91	1.92428	0.96	37	18.5	0	0	1	0	1	0	0	coding
HIST1H3J	2	70	35	1.80952	0.9	2.92428	1.46	61	30.5	0	0	2	0	0	0	0	coding
HIST1H4A	3	456	19	2.48409	0.8	2.80391	0.88	226	17	0	0	2	0	1	0	0	start_codon
HIST1H4B	3	121	31	2.18119	0.81	2.47127	0.8	101	26	0	0	2	0	1	0	0	coding
HIST1H4C	3	121	33	2.8114	0.92	3.69345	1.13	88	30	0	0	1	0	1	1	0	start_codon
HIST1H4D	3	94	8	2.65981	0.88	2.63749	0.85	74	8	0	0	1	0	1	1	0	stop_codon
HIST1H4E	1	489	489	0.791411	0.79	1.2075	1.21	383	383	0	0	0	0	0	1	0	stop_codon
HIST1H4F	2	261	130	1.5693	0.78	2.34341	1.17	193	96.5	0	0	0	0	1	1	0	start_codon
HIST1H4H	2	554	277	1.56588	0.78	2.52711	1.26	405	202.5	0	0	0	0	1	1	0	stop_codon
HIST1H4I	2	260	130	1.55028	0.78	1.94178	0.97	163	81.5	0	0	1	0	1	0	0	start_codon
HIST1H4J	3	345	40	2.12307	0.7	2.51826	0.85	226	32	0	0	1	0	1	1	0	start_codon
HIST1H4K	1	407	407	0.886978	0.89	1.14253	1.14	186	186	0	0	0	0	1	0	0	start_codon
HIST1H4L	1	144	144	0.736111	0.74	0.724276	0.72	67	67	0	0	0	0	1	0	0	start_codon
HIST2H2AA4	12	713	35	9.88719	0.82	15.7302	1.32	326	21.5	0	0	9	0	1	2	0	stop_codon
HIST2H2AB	2	54	27	1.70238	0.85	2.55991	1.28	45	22.5	0	0	1	0	1	0	0	coding
HIST2H2AC	4	171	46	2.979	0.78	3.70757	0.94	133	33.5	0	0	3	0	1	0	0	start_codon
HIST2H2BE	3	157	49	2.45692	0.83	3.73239	1.2	131	42	0	1	0	0	1	1	0	intron
HIST2H3A	3	860	307	2.3871	0.78	3.70024	1.32	395	122	0	0	1	0	1	1	0	start_codon
HIST2H3C	7	425	35	6.09446	0.86	7.19082	1.01	198	16	1	0	5	0	0	1	0	stop_codon
HIST2H3D	4	96	22	3.34816	0.87	3.64237	0.91	47	8	0	0	4	0	0	0	0	coding
HIST2H3DP1	2	34	17	1.60474	0.8	1.727	0.86	21	10.5	0	0	0	0	0	0	0	unprocessed_pseudogene
HIST2H4A	2	315	157	1.46081	0.73	2.69723	1.35	199	99.5	0	0	0	0	1	1	0	start_codon
HIST2H4B	4	362	18	3.31225	0.85	4.12074	1.01	140	15.5	0	0	2	0	1	1	0	stop_codon
HIST3H2A	6	103	14	4.74755	0.8	5.37221	0.81	90	12	0	0	5	0	1	0	0	coding
HIST3H2BB	2	36	18	1.55172	0.78	1.74819	0.87	33	16.5	0	0	1	0	1	0	0	start_codon
HIST3H3	1	9	9	0.555556	0.56	0.69897	0.7	7	7	0	0	1	0	0	0	0	coding
HIST4H4	1	67	67	0.791045	0.79	0.770033	0.77	48	48	0	0	0	0	1	0	0	start_codon
HIVEP2	3	31	11	2.67832	0.91	2.54407	0.85	27	8	1	1	0	1	0	0	0	3'utr
HIVEP3	8	119	13	6.95612	0.89	8.21362	1.02	83	10	2	1	5	0	0	0	0	coding
HJURP	1	25	25	0.88	0.88	1.04139	1.04	20	20	0	0	0	0	1	0	0	start_codon
HLA-A	2	18	9	1.62338	0.81	1.39794	0.7	18	9	0	0	1	0	0	0	0	coding-intron
HLA-C	5	98	17	4.01896	0.71	4.50177	0.9	79	14	0	0	3	0	2	0	0	coding
HLA-E	5	55	10	4.51497	0.91	4.58973	0.95	48	8	0	0	2	1	1	0	0	start_codon
HLA-H	1	42	42	0.880952	0.88	1.5682	1.57	14	14	0	0	0	0	0	0	0	unprocessed_pseudogene
HLA-L	1	7	7	1	1	0.845098	0.85	5	5	0	0	0	0	0	0	0	processed_transcript
HLTF	1	15	15	0.933333	0.93	0.845098	0.85	13	13	1	0	0	0	0	0	0	5'utr
HM13	1	13	13	1	1	1.11394	1.11	9	9	1	0	0	0	0	0	0	5'utr
HMCES	2	20	10	1.88889	0.94	1.94448	0.97	16	8	2	0	0	0	0	0	0	5'utr
HMG20B	2	26	13	1.45113	0.73	1.8451	0.92	22	11	0	1	0	0	0	0	0	intron
HMGA1	6	144	11	4.9893	0.85	5.49638	0.9	112	10.5	4	0	0	2	0	0	0	5'utr
HMGB1	3	96	18	2.44981	0.78	2.77452	0.85	40	16	1	0	1	0	0	0	0	coding
HMGB2	5	332	11	4.15618	0.88	4.74118	0.9	165	9	1	0	2	1	1	0	0	3'utr
HMGCR	1	9	9	1	1	0.954243	0.95	7	7	1	0	0	0	0	0	0	5'utr
HMGCS1	2	14	7	2	1	1.62325	0.81	12	6	0	1	0	1	0	0	0	3'utr
HMGN1	2	36	18	1.57635	0.79	2.09691	1.05	26	13	2	0	0	0	0	0	0	5'utr
HMGN2	3	264	28	2.46644	0.82	3.02857	0.95	129	14	0	0	0	0	1	0	0	processed_transcript
HMGN4	2	30	15	1.43541	0.72	1.39794	0.7	21	10.5	2	0	0	0	0	0	0	5'utr
HMGXB3	1	31	31	0.967742	0.97	1.17609	1.18	18	18	0	0	1	0	0	0	0	coding
HMGXB4	2	30	15	1.62201	0.81	1.83251	0.92	28	14	1	1	0	0	0	0	0	5'utr
HMHA1	8	80	8	7.17298	0.9	7.16979	0.9	68	7.5	1	0	5	1	0	1	0	5'utr
HMOX2	1	9	9	1	1	0.954243	0.95	8	8	0	0	0	0	0	0	0	5'utr-intron
HN1	1	71	71	0.929577	0.93	1.34242	1.34	60	60	0	0	0	0	1	0	0	start_codon
HNRNPA0	14	1376	40	11.3173	0.84	16.2777	1.09	683	23.5	2	0	8	3	1	0	0	3'utr
HNRNPA1	2	26	13	1.15033	0.58	1.68124	0.84	23	11.5	1	0	0	0	1	0	0	5'utr
HNRNPA2B1	6	316	23	5.14092	0.89	7.48933	1.24	244	18.5	0	0	2	1	1	0	0	3'utr
HNRNPA3	2	76	38	1.7682	0.88	2.43457	1.22	40	20	0	0	2	0	0	0	0	coding
HNRNPA3P3	1	10	10	0.7	0.7	0.845098	0.85	10	10	0	0	0	0	0	0	0	processed_pseudogene
HNRNPA3P6	1	10	10	0.8	0.8	0.60206	0.6	8	8	0	0	0	0	0	0	0	processed_pseudogene
HNRNPAB	2	1083	541	1.85607	0.93	2.31241	1.16	339	169.5	0	0	0	1	1	0	0	start_codon
HNRNPC	2	77	38	1.60074	0.8	2.45738	1.23	62	31	1	0	0	0	1	0	0	start_codon
HNRNPD	3	304	85	2.13424	0.78	3.63657	1.18	201	62	2	0	0	0	1	0	0	start_codon
HNRNPDL	5	123	25	4.40474	0.89	5.82338	1.05	101	17	3	0	1	0	1	0	0	coding
HNRNPF	11	420	19	9.27677	0.86	11.4639	1.11	299	17	8	1	0	0	1	0	0	start_codon
HNRNPH1	5	225	11	3.90628	0.77	4.33716	0.85	152	11	2	0	0	0	1	0	0	coding-intron
HNRNPH3	4	56	11	3.77818	0.98	4.33009	1	51	10.5	1	0	1	0	0	1	0	5'utr
HNRNPK	7	162	16	5.41319	0.78	6.97935	1	131	15	1	0	3	1	1	0	0	3'utr
HNRNPKP2	2	15	7	1.73214	0.87	1.62325	0.81	13	6.5	0	0	0	0	0	0	0	processed_pseudogene
HNRNPL	2	179	89	1.40615	0.7	1.66057	0.83	110	55	0	0	2	0	0	0	0	coding
HNRNPLL	1	13	13	0.769231	0.77	1	1	7	7	1	0	0	0	0	0	0	5'utr
HNRNPM	1	33	33	0.515152	0.52	0.929419	0.93	29	29	0	0	0	0	1	0	0	start_codon
HNRNPR	2	187	93	1.73159	0.87	2.03779	1.02	43	21.5	1	0	1	0	0	0	0	coding
HNRNPU	5	129	17	4.28958	0.88	5.60866	1	84	12	3	0	2	0	0	0	0	coding
HNRNPUL1	5	71	11	4.28075	0.91	4.29226	0.85	49	9	0	0	2	1	1	0	0	start_codon
HNRNPUL2	4	77	20	3.29929	0.83	3.18752	0.79	65	18	1	0	2	1	0	0	0	3'utr
HNRNPUL2-BSCL2	1	9	9	0.777778	0.78	0.845098	0.85	9	9	0	0	0	0	0	0	0	nonsense_mediated_decay
HOMER1	6	307	25	4.88765	0.84	6.38114	1.09	227	21	6	0	0	0	0	0	0	5'utr
HOOK3	1	17	17	1	1	1.23045	1.23	15	15	1	0	0	0	0	0	0	5'utr
HP1BP3	1	7	7	1	1	0.845098	0.85	7	7	0	1	0	0	0	0	0	intron
HPCAL1	4	110	29	3.17604	0.77	4.20246	1.12	82	20	4	0	0	0	0	0	0	5'utr
HPS1	1	15	15	0.866667	0.87	1.11394	1.11	11	11	1	0	0	0	0	0	0	5'utr
HPS4	1	9	9	1	1	0.954243	0.95	9	9	0	0	0	1	0	0	0	3'utr
HPS6	2	19	9	1.72727	0.86	1.80618	0.9	16	8	0	0	2	0	0	0	0	coding
HS2ST1	2	119	59	1.66469	0.83	2.78604	1.39	91	45.5	2	0	0	0	0	0	0	5'utr
HSCB	1	7	7	0.857143	0.86	0.778151	0.78	6	6	0	0	0	0	1	0	0	start_codon
HSD17B10	1	15	15	0.857143	0.86	0.778151	0.78	11	11	0	0	1	0	0	0	0	coding
HSD17B12	1	8	8	0.625	0.63	0.69897	0.7	6	6	0	0	1	0	0	0	0	coding
HSF1	1	7	7	1	1	0.845098	0.85	4	4	1	0	0	0	0	0	0	5'utr
HSP90AA1	1	66	66	0.984848	0.98	1.51188	1.51	28	28	0	0	1	0	0	0	0	coding
HSP90AB1	4	161	22	3.09134	0.77	4.0202	0.93	134	21	1	0	2	0	0	0	0	5'utr
HSP90AB3P	1	17	17	0.764706	0.76	1.11394	1.11	16	16	0	0	0	0	0	0	0	processed_pseudogene
HSP90B1	3	145	11	2.54576	0.86	2.51851	0.78	101	7	0	0	0	0	1	1	0	start_codon
HSPA14	2	31	15	1.93333	0.97	2.35025	1.18	17	8.5	1	1	0	0	0	0	0	5'utr
HSPA1B	1	10	10	0.5	0.5	0.69897	0.7	7	7	1	0	0	0	0	0	0	5'utr
HSPA4	3	96	40	2.65139	0.88	2.9834	0.94	64	24	2	0	1	0	0	0	0	5'utr
HSPA5	3	303	11	2.4879	0.82	2.80287	0.65	202	11	0	0	1	1	1	0	0	3'utr
HSPA8	1	54	54	0.611111	0.61	1.21748	1.22	38	38	1	0	0	0	0	0	0	5'utr
HSPA9	1	9	9	0.888889	0.89	0.90309	0.9	8	8	1	0	0	0	0	0	0	5'utr
HSPB1	3	76	16	2.55227	0.85	3.17653	1.11	61	15	0	2	0	1	0	0	0	intron
HSPBP1	3	28	8	2.34753	0.86	2.52634	0.85	27	7	1	0	1	0	0	0	0	coding
HSPD1	1	7	7	0.857143	0.86	0.778151	0.78	7	7	1	0	0	0	0	0	0	5'utr
HSPE1	3	78	12	2.6697	0.91	3.40654	1	64	10	2	0	0	0	1	0	0	5'utr
HSPH1	4	137	28	3.68391	0.91	5.01891	1.15	103	22.5	2	0	1	0	1	0	0	coding
HTATSF1	2	34	17	1.64423	0.82	1.66901	0.83	33	16.5	2	0	0	0	0	0	0	5'utr
HTRA2	2	21	10	2	1	1.99123	1	17	8.5	1	0	1	0	0	0	0	5'utr
HUWE1	1	10	10	1	1	1	1	10	10	1	0	0	0	0	0	0	5'utr
HYAL2	1	16	16	0.875	0.88	1.14613	1.15	6	6	1	0	0	0	0	0	0	5'utr
HYPK	1	7	7	1	1	0.845098	0.85	7	7	0	0	1	0	0	0	0	coding
ICAM2	1	8	8	1	1	0.90309	0.9	8	8	0	0	1	0	0	0	0	coding
ICK	2	28	14	1.79167	0.9	2.18752	1.09	13	6.5	2	0	0	0	0	0	0	5'utr
ICMT	3	108	12	2.67054	0.84	2.95424	1	59	11	0	0	2	0	1	0	0	coding
ID1	3	33	10	2.8125	1	2.95904	1	30	10	1	0	1	0	1	0	0	5'utr
ID3	5	189	21	4.09787	0.86	5.80545	1.23	162	18	0	0	0	4	1	0	0	3'utr
IDH2	1	7	7	0.714286	0.71	0.69897	0.7	7	7	0	0	0	1	0	0	0	3'utr
IDH3B	1	9	9	0.888889	0.89	0.90309	0.9	7	7	0	0	1	0	0	0	0	coding
IDI1	3	38	12	2.94737	1	2.87852	0.95	30	10	0	0	2	0	1	0	0	coding
IER2	26	812	17	21.4634	0.83	25.4531	0.95	681	14.5	6	3	7	6	1	1	0	5'utr
IER3	6	447	45	4.91601	0.82	7.14457	1.24	346	38.5	0	0	1	4	1	0	0	3'utr
IER3IP1	1	24	24	0.875	0.88	1.32222	1.32	16	16	0	0	0	0	1	0	0	start_codon
IER5	4	43	11	3.12927	0.81	3.04139	0.72	41	10.5	1	0	1	2	0	0	0	5'utr
IER5L	3	46	18	2.38333	0.83	2.64345	0.9	36	14	1	0	1	1	0	0	0	3'utr
IFFO2	1	8	8	1	1	0.90309	0.9	6	6	1	0	0	0	0	0	0	5'utr
IFI16	3	72	30	2.35556	0.8	2.72263	0.9	68	29	3	0	0	0	0	0	0	5'utr
IFI27L1	1	9	9	1	1	0.954243	0.95	8	8	1	0	0	0	0	0	0	5'utr
IFI6	2	53	26	1.82308	0.91	2.63548	1.32	36	18	1	0	1	0	0	0	0	coding
IFIH1	2	20	10	1.79167	0.9	1.58546	0.79	20	10	2	0	0	0	0	0	0	5'utr
IFIT5	1	18	18	0.777778	0.78	0.845098	0.85	15	15	1	0	0	0	0	0	0	5'utr
IFITM1	1	7	7	1	1	0.845098	0.85	7	7	1	0	0	0	0	0	0	5'utr
IFNAR2	2	42	21	1.70822	0.85	1.83727	0.92	34	17	2	0	0	0	0	0	0	5'utr
IFRD2	1	8	8	1	1	0.90309	0.9	8	8	0	0	0	1	0	0	0	3'utr
IFT27	2	29	14	1.84615	0.92	2.24551	1.12	25	12.5	2	0	0	0	0	0	0	5'utr
IGF2BP1	2	45	22	1.88571	0.94	2.19033	1.1	40	20	2	0	0	0	0	0	0	5'utr
IKBKAP	1	15	15	1	1	1.17609	1.18	15	15	1	0	0	0	0	0	0	5'utr
IKZF1	7	98	11	6.21861	0.89	6.86559	0.85	67	7	0	0	2	5	0	0	0	coding
IL10RB	1	17	17	0.882353	0.88	1.17609	1.18	16	16	0	0	0	0	1	0	0	start_codon
IL16	1	11	11	0.909091	0.91	1	1	10	10	0	0	1	0	0	0	0	coding
IL17RA	3	30	9	2.38889	0.79	2.34242	0.74	27	9	0	0	3	0	0	0	0	coding
IL21R	5	74	12	4.2902	0.86	4.97543	0.95	65	10	4	0	1	0	0	0	0	5'utr
IL2RG	2	19	9	1.8	0.9	1.5563	0.78	18	9	1	0	1	0	0	0	0	coding
IL4I1	1	18	18	0.722222	0.72	0.812913	0.81	17	17	1	0	0	0	0	0	0	5'utr
IL4R	1	12	12	0.666667	0.67	0.90309	0.9	11	11	0	0	1	0	0	0	0	coding
IL6ST	2	25	12	1.84615	0.92	2.12057	1.06	19	9.5	2	0	0	0	0	0	0	5'utr
ILF2	2	61	30	1.72361	0.86	2.24961	1.12	38	19	1	0	0	0	0	0	0	intron-5'utr
ILF3	6	239	8	4.94985	0.84	5.19835	0.85	176	8.5	2	0	1	3	0	0	0	5'utr
ILKAP	1	14	14	0.857143	0.86	1.07918	1.08	14	14	1	0	0	0	0	0	0	5'utr
IMMP1L	1	9	9	1	1	0.954243	0.95	8	8	1	0	0	0	0	0	0	5'utr
IMMT	1	10	10	0.9	0.9	0.653213	0.65	7	7	0	0	1	0	0	0	0	coding
IMP3	2	30	15	1.36199	0.68	1.6902	0.85	25	12.5	0	0	1	0	1	0	0	coding
IMPAD1	3	107	27	2.40899	0.8	2.60888	0.95	82	19	2	0	1	0	0	0	0	coding
INAFM1	1	8	8	1	1	0.90309	0.9	7	7	0	0	1	0	0	0	0	coding
INCENP	1	8	8	0.875	0.88	0.845098	0.85	7	7	1	0	0	0	0	0	0	5'utr
INF2	1	10	10	0.9	0.9	0.954243	0.95	8	8	0	0	1	0	0	0	0	coding
ING1	7	423	46	5.84171	0.87	7.58716	1.01	238	26	6	0	0	0	1	0	0	5'utr
ING2	1	22	22	0.727273	0.73	0.90309	0.9	19	19	1	0	0	0	0	0	0	5'utr
ING5	6	91	10	5.44085	0.88	5.86672	0.92	68	9.5	0	3	0	3	0	0	0	intron
INO80E	5	65	10	4.6	0.9	4.43482	0.9	47	7	1	0	3	0	1	0	0	5'utr
INPP4A	3	36	13	2.39231	0.85	2.62685	0.85	34	13	3	0	0	0	0	0	0	5'utr
INPP5E	2	58	29	1.51667	0.76	2.30963	1.15	49	24.5	2	0	0	0	0	0	0	5'utr
INSIG1	4	86	16	3.59632	0.9	4.19145	1.02	74	13.5	0	0	1	2	0	0	0	5'utr-intron
INSIG2	1	11	11	0.909091	0.91	1	1	8	8	0	0	0	0	0	0	0	processed_transcript
INTS1	1	10	10	0.9	0.9	0.954243	0.95	7	7	0	0	1	0	0	0	0	coding
INTS10	1	9	9	1	1	0.954243	0.95	9	9	1	0	0	0	0	0	0	5'utr
INTS3	1	8	8	0.875	0.88	0.845098	0.85	8	8	1	0	0	0	0	0	0	5'utr
INTS5	3	39	15	2.65714	0.86	2.61066	0.78	22	5	0	0	2	0	1	0	0	coding
IP6K1	5	85	14	4.26252	0.86	5.12575	1.04	72	13	3	0	0	2	0	0	0	3'utr
IP6K2	3	59	10	2.55714	0.86	3.2465	0.85	55	10	1	0	0	0	2	0	0	start_codon
IPO13	4	36	8	3.30159	0.82	3.44279	0.81	34	8.5	4	0	0	0	0	0	0	5'utr
IQCE	1	10	10	0.8	0.8	0.90309	0.9	6	6	1	0	0	0	0	0	0	5'utr
IQGAP1	1	14	14	0.928571	0.93	1.11394	1.11	6	6	0	0	0	0	1	0	0	start_codon
IQSEC1	1	12	12	0.75	0.75	0.954243	0.95	11	11	0	1	0	0	0	0	0	intron
IRAK1	6	120	10	4.87208	0.78	5.13021	0.84	99	9.5	1	0	1	2	1	0	0	3'utr
IRF1	7	388	27	5.83078	0.88	8.28586	1.11	248	22	2	0	0	5	0	0	0	3'utr
IRF2	2	24	12	1.67832	0.84	2	1	23	11.5	2	0	0	0	0	0	0	5'utr
IRF2BP1	7	130	16	5.92463	0.93	7.35361	1.08	104	13	5	0	2	0	0	0	0	coding
IRF2BP2	2	18	9	1.90909	0.95	1.8451	0.92	17	8.5	0	0	0	0	0	0	0	processed_transcript
IRF2BPL	13	246	15	11.6829	0.88	13.1589	0.93	191	14	5	0	7	0	0	1	0	stop_codon
IRF3	3	39	14	2.69524	0.9	2.8811	0.95	36	13	1	1	1	0	0	0	0	coding
IRF9	2	75	37	1.80037	0.9	2.16037	1.08	49	24.5	0	1	1	0	0	0	0	intron
IRGQ	1	11	11	0.909091	0.91	0.69897	0.7	6	6	1	0	0	0	0	0	0	5'utr
IRS1	1	7	7	0.571429	0.57	0.60206	0.6	7	7	1	0	0	0	0	0	0	5'utr
IRS2	2	26	13	1.9375	0.97	2.17609	1.09	17	8.5	2	0	0	0	0	0	0	5'utr
ISCA2	1	12	12	1	1	1.07918	1.08	12	12	0	0	1	0	0	0	0	coding
ISCU	2	29	14	1.77976	0.89	2.12385	1.06	19	9.5	0	0	1	0	1	0	0	start_codon
ISG20L2	3	82	17	2.55989	0.84	3.4621	1.15	62	14	3	0	0	0	0	0	0	5'utr
ISOC1	1	27	27	0.925926	0.93	1.39794	1.4	15	15	0	0	1	0	0	0	0	coding
IST1	1	8	8	1	1	0.90309	0.9	7	7	1	0	0	0	0	0	0	5'utr
ISY1	1	9	9	0.777778	0.78	0.845098	0.85	9	9	1	0	0	0	0	0	0	5'utr
ITCH	2	20	10	1.79798	0.9	1.60206	0.8	15	7.5	1	0	0	0	0	0	0	5'utr
ITFG1	2	32	16	1.92308	0.96	2.35793	1.18	26	13	0	0	1	0	1	0	0	coding
ITGA4	1	10	10	1	1	1	1	7	7	1	0	0	0	0	0	0	5'utr
ITGAE	1	10	10	0.9	0.9	0.954243	0.95	5	5	0	0	0	0	0	0	0	intron-coding
ITGAV	1	9	9	1	1	0.954243	0.95	9	9	1	0	0	0	0	0	0	5'utr
ITGB1BP1	1	23	23	1	1	1.36173	1.36	13	13	1	0	0	0	0	0	0	5'utr
ITGB2	1	10	10	1	1	1	1	8	8	0	0	0	0	0	0	0	coding-intron
ITK	6	55	7	5.62838	0.94	5.45062	0.87	51	7.5	1	0	0	5	0	0	0	5'utr
ITM2A	1	76	76	0.894737	0.89	1.83251	1.83	54	54	1	0	0	0	0	0	0	5'utr
ITM2B	2	150	75	1.86525	0.93	2.13751	1.07	70	35	1	0	1	0	0	0	0	5'utr
ITM2C	3	47	11	2.44126	0.82	2.57749	0.85	32	10	0	0	2	0	1	0	0	start_codon
ITPKA	1	7	7	0.857143	0.86	0.778151	0.78	7	7	0	0	1	0	0	0	0	coding
ITPKB	10	185	16	8.6149	0.88	10.6435	1.08	150	13	4	0	6	0	0	0	0	coding
ITPRIP	1	7	7	0.857143	0.86	0.778151	0.78	7	7	0	0	0	1	0	0	0	3'utr
IVNS1ABP	3	50	15	2.51742	0.88	3.06258	1	40	11	3	0	0	0	0	0	0	5'utr
JADE2	3	40	9	2.77273	1	2.8379	0.95	36	8	0	0	0	1	0	0	0	processed_transcript
JAK2	1	13	13	0.769231	0.77	1	1	9	9	0	1	0	0	0	0	0	intron
JARID2	6	75	11	4.94459	0.84	4.97667	0.84	71	10.5	0	1	5	0	0	0	0	coding
JKAMP	1	8	8	1	1	0.90309	0.9	8	8	0	1	0	0	0	0	0	intron
JMJD1C	1	7	7	1	1	0.845098	0.85	6	6	0	0	1	0	0	0	0	coding
JMJD8	2	37	18	1.72381	0.86	1.89209	0.95	35	17.5	0	1	0	0	0	0	0	intron
JMY	1	15	15	0.933333	0.93	1.14613	1.15	14	14	1	0	0	0	0	0	0	5'utr
JOSD1	3	180	47	2.46205	0.85	3.48612	1.19	127	41	1	0	0	0	0	0	0	5'utr
JTB	2	103	51	1.68067	0.84	2.44716	1.22	89	44.5	0	0	0	0	1	0	0	start_codon
JUN	2	17	8	1.625	0.81	1.65321	0.83	14	7	2	0	0	0	0	0	0	5'utr
JUNB	8	92	9	6.70762	0.83	7.28221	0.93	80	8	3	0	2	3	0	0	0	5'utr
JUND	17	1307	67	13.793	0.85	22.18	1.41	760	44	1	0	9	5	1	1	0	3'utr
KANSL1	9	363	20	7.62994	0.9	8.51728	0.85	243	16	2	6	0	0	0	0	0	intron-coding
KANSL3	1	10	10	1	1	1	1	7	7	0	0	0	1	0	0	0	3'utr
KARS	1	24	24	0.75	0.75	0.778151	0.78	22	22	0	0	0	0	1	0	0	start_codon
KAT6A	3	34	11	2.45942	0.86	2.82737	0.9	23	5	2	0	1	0	0	0	0	coding
KATNA1	3	25	8	2.76389	0.89	2.65128	0.9	21	7	3	0	0	0	0	0	0	5'utr
KAZALD1	1	13	13	1	1	1.11394	1.11	10	10	0	0	1	0	0	0	0	coding
KBTBD11	6	74	11	5.18333	0.83	4.90733	0.78	71	10.5	1	0	4	0	0	1	0	5'utr
KBTBD2	4	196	21	2.72254	0.7	4.07918	1	134	20.5	3	0	0	0	0	0	0	5'utr
KBTBD6	1	9	9	1	1	0.954243	0.95	8	8	1	0	0	0	0	0	0	5'utr
KCMF1	2	54	27	1.36176	0.68	1.66745	0.83	27	13.5	2	0	0	0	0	0	0	5'utr
KCNAB2	8	82	9	6.89358	0.85	7.03688	0.87	71	8	0	1	1	6	0	0	0	intron
KCNG3	3	28	9	2.78889	0.9	2.51055	0.95	24	8	1	0	2	0	0	0	0	coding
KCNJ14	1	7	7	1	1	0.845098	0.85	7	7	0	0	0	1	0	0	0	3'utr
KCNK1	2	34	17	1.74603	0.87	1.85733	0.93	32	16	0	0	1	0	1	0	0	start_codon
KCNK5	2	31	15	1.81197	0.91	2.2833	1.14	23	11.5	2	0	0	0	0	0	0	5'utr
KCTD13	2	57	28	1.95745	0.98	2.35218	1.18	41	20.5	0	0	0	0	0	0	0	processed_transcript
KCTD2	3	38	15	2.5625	1	2.6744	0.85	24	10	0	0	1	1	0	0	0	processed_transcript
KCTD20	2	21	10	1.92857	0.96	1.95904	0.98	17	8.5	1	0	0	1	0	0	0	5'utr
KCTD5	2	30	15	1.65217	0.83	2.02119	1.01	26	13	0	0	1	1	0	0	0	coding
KCTD9	1	26	26	0.807692	0.81	0.845098	0.85	26	26	1	0	0	0	0	0	0	5'utr
KDELR1	2	48	24	1.5	0.75	2.36361	1.18	39	19.5	2	0	0	0	0	0	0	5'utr
KDM1A	1	9	9	1	1	0.954243	0.95	7	7	1	0	0	0	0	0	0	5'utr
KDM1B	1	9	9	0.666667	0.67	0.778151	0.78	8	8	1	0	0	0	0	0	0	5'utr
KDM2A	9	140	11	7.53016	0.8	7.8692	0.85	114	8	6	1	0	2	0	0	0	5'utr
KDM2B	1	10	10	1	1	1	1	9	9	0	0	0	0	0	0	0	intron-coding
KDM3B	4	106	19	3.50792	0.86	4.22266	1	92	16	1	0	2	0	1	0	0	5'utr
KDM4C	1	20	20	0.9	0.9	1.25527	1.26	8	8	0	1	0	0	0	0	0	intron
KDM5A	2	41	20	1.54167	0.77	1.48855	0.74	26	13	1	0	0	0	1	0	0	start_codon
KDM5B	1	14	14	0.928571	0.93	1.11394	1.11	11	11	1	0	0	0	0	0	0	5'utr
KDM5C	5	122	10	4.40909	0.91	5.16732	1	85	10	3	0	1	1	0	0	0	3'utr
KDM6B	11	123	11	9.76606	0.92	9.87459	0.88	107	9	2	0	6	1	1	1	0	5'utr
KHDRBS1	2	83	41	1.73273	0.87	2.35793	1.18	61	30.5	1	0	0	0	1	0	0	5'utr
KHNYN	1	14	14	0.857143	0.86	0.778151	0.78	10	10	0	0	1	0	0	0	0	coding
KHSRP	6	324	16	4.38335	0.8	5.13876	0.77	200	15.5	1	1	1	2	1	0	0	3'utr
KIAA0100	1	9	9	0.777778	0.78	0.845098	0.85	9	9	0	1	0	0	0	0	0	intron
KIAA0101	2	18	9	1.44156	0.72	1.60206	0.8	17	8.5	1	0	0	0	1	0	0	start_codon
KIAA0195	1	7	7	0.714286	0.71	0.69897	0.7	6	6	1	0	0	0	0	0	0	5'utr
KIAA0196	1	7	7	1	1	0.845098	0.85	7	7	1	0	0	0	0	0	0	5'utr
KIAA0226	1	12	12	0.666667	0.67	0.60206	0.6	12	12	0	0	0	0	1	0	0	start_codon
KIAA0247	2	34	17	1.96296	0.98	1.95904	0.98	21	10.5	0	0	1	0	0	0	0	5'utr-intron
KIAA0430	1	10	10	0.9	0.9	0.653213	0.65	9	9	1	0	0	0	0	0	0	5'utr
KIAA0513	2	16	8	2	1	1.79934	0.9	12	6	2	0	0	0	0	0	0	5'utr
KIAA0895	1	11	11	0.727273	0.73	0.60206	0.6	10	10	1	0	0	0	0	0	0	5'utr
KIAA1524	1	7	7	1	1	0.845098	0.85	2	2	0	0	0	0	1	0	0	start_codon
KIAA1551	1	9	9	0.888889	0.89	0.90309	0.9	9	9	1	0	0	0	0	0	0	5'utr
KIAA1586	2	15	7	1.58929	0.79	1.54407	0.77	13	6.5	1	0	0	0	1	0	0	5'utr
KIAA1715	2	18	9	1.65	0.83	1.73239	0.87	14	7	2	0	0	0	0	0	0	5'utr
KIAA1919	3	42	12	2.52432	0.82	2.26864	0.74	36	11	3	0	0	0	0	0	0	5'utr
KIAA1958	1	9	9	1	1	0.954243	0.95	8	8	1	0	0	0	0	0	0	5'utr
KIAA2013	7	174	13	6.2155	0.92	6.87335	0.85	140	11	0	0	5	0	1	0	0	coding
KIAA2018	1	27	27	1	1	1.43136	1.43	21	21	1	0	0	0	0	0	0	5'utr
KIF11	1	7	7	1	1	0.845098	0.85	5	5	1	0	0	0	0	0	0	5'utr
KIF21B	3	26	9	2.51429	0.8	2.25527	0.7	20	6	0	0	0	3	0	0	0	3'utr
KIF22	2	18	9	1.76623	0.88	1.47712	0.74	16	8	0	0	1	0	0	0	0	intron-coding
[truncated: 2,917 more rows]

## Sheet: APA_REP2
GeneName	Sites	ReadCountSum	ReadCountMed	T2CFractionSum	T2CFractionMed	ConversionSpecificitySum	ConversionSpecificityMed	UniqueReadsSum	UniqueReadsMed	5'utr	Intron	Exon	3'utr	Start_codon	Stop_codon	Junction	GeneType
A1BG	2	16	8	2	1	1.79934	0.9	16	8	0	0	1	1	0	0	0	3'utr
A2MP1	3	322	13	2.69496	0.92	2.68031	0.86	69	13	0	0	0	0	0	0	0	transcribed_unprocessed_pseudogene
AAAS	1	9	9	1	1	0.954243	0.95	8	8	0	0	0	0	1	0	0	start_codon
AAK1	1	9	9	0.888889	0.89	0.90309	0.9	9	9	1	0	0	0	0	0	0	5'utr
AARS	1	15	15	0.714286	0.71	1	1	14	14	1	0	0	0	0	0	0	5'utr
AASDHPPT	1	10	10	1	1	1	1	7	7	0	0	1	0	0	0	0	coding
AATF	1	103	103	0.912621	0.91	1.6721	1.67	60	60	0	0	0	0	1	0	0	start_codon
ABCC1	1	7	7	1	1	0.845098	0.85	6	6	1	0	0	0	0	0	0	5'utr
ABCF1	1	7	7	0.857143	0.86	0.778151	0.78	5	5	0	0	1	0	0	0	0	coding
ABCF2	1	11	11	0.727273	0.73	0.60206	0.6	8	8	0	1	0	0	0	0	0	intron
ABHD10	2	14	7	2	1	1.6902	0.85	11	5.5	0	0	2	0	0	0	0	coding
ABHD12	2	18	9	1.675	0.84	1.74819	0.87	17	8.5	1	0	1	0	0	0	0	coding
ABHD13	1	43	43	0.906977	0.91	1.11394	1.11	38	38	1	0	0	0	0	0	0	5'utr
ABHD17A	4	102	19	3.6963	0.91	4.76464	1.21	56	10	3	0	1	0	0	0	0	coding
ABHD17AP1	2	16	8	1.74603	0.87	1.68124	0.84	8	4	0	0	0	0	0	0	0	unprocessed_pseudogene
ABHD17AP3	1	13	13	0.846154	0.85	1.04139	1.04	9	9	0	0	0	0	0	0	0	unprocessed_pseudogene
ABHD17AP6	4	114	27	3.05468	0.78	3.88581	1.01	65	13.5	0	0	0	0	0	0	0	unprocessed_pseudogene
ABHD17B	3	119	24	2.5172	0.83	2.97197	1	71	19	3	0	0	0	0	0	0	5'utr
ABHD5	1	35	35	0.628571	0.63	1.04139	1.04	33	33	0	0	0	0	1	0	0	start_codon
ABI1	1	18	18	0.944444	0.94	1.23045	1.23	13	13	1	0	0	0	0	0	0	5'utr
ABI2	2	28	14	1.52381	0.76	1.90309	0.95	25	12.5	1	0	0	0	1	0	0	5'utr
ABL1	7	92	12	5.66292	0.82	6.59661	0.98	84	11	1	0	1	5	0	0	0	5'utr
ABRACL	2	92	46	1.67805	0.84	1.98227	0.99	53	26.5	1	0	1	0	0	0	0	5'utr
AC002398.9	1	80	80	0.925	0.93	1.17026	1.17	34	34	0	0	0	0	1	0	0	start_codon
AC004980.7	4	92	10	2.76494	0.62	3.38739	0.65	50	8.5	0	0	0	0	0	0	0	processed_transcript
AC005262.3	1	10	10	1	1	1	1	9	9	0	0	0	0	0	0	0	antisense
AC005562.1	2	18	9	1.81818	0.91	1.79934	0.9	15	7.5	0	0	0	0	0	0	0	processed_transcript
AC005795.1	1	9	9	1	1	0.954243	0.95	6	6	0	0	0	0	0	0	0	processed_pseudogene
AC005822.1	1	29	29	0.551724	0.55	0.90309	0.9	21	21	0	0	0	0	0	0	0	processed_pseudogene
AC006538.1	1	10	10	0.9	0.9	0.954243	0.95	7	7	0	0	0	0	0	0	0	sense_intronic
AC007040.8	1	501	501	0.566866	0.57	0.948168	0.95	103	103	0	0	0	0	0	0	0	antisense
AC007773.2	2	31	15	1.875	0.94	2.20683	1.1	18	9	0	0	0	0	0	0	0	antisense
AC008155.1	1	11	11	1	1	1.04139	1.04	3	3	0	0	0	0	0	0	0	processed_pseudogene
AC009403.2	1	7	7	0.857143	0.86	0.778151	0.78	7	7	0	0	0	0	0	0	0	antisense
AC009961.3	1	8	8	0.75	0.75	0.778151	0.78	5	5	0	0	0	0	0	0	0	lincRNA_exon
AC011893.3	1	10	10	0.9	0.9	0.653213	0.65	8	8	0	0	0	0	0	0	0	antisense
AC013394.2	1	8	8	1	1	0.90309	0.9	6	6	0	0	0	0	0	0	0	lincRNA_exon
AC018890.6	1	31	31	0.774194	0.77	1.38021	1.38	18	18	0	0	0	0	0	0	0	antisense
AC024592.12	1	30	30	0.9	0.9	1.43136	1.43	30	30	0	0	0	0	1	0	0	start_codon
AC024937.6	1	16	16	0.8125	0.81	1.11394	1.11	12	12	0	0	0	0	0	0	0	processed_pseudogene
AC073046.25	2	26	13	1.71242	0.86	1.44716	0.72	23	11.5	0	0	0	0	0	0	0	lincRNA_intron
AC073283.4	1	23	23	0.956522	0.96	1.34242	1.34	14	14	0	0	0	0	0	0	0	lincRNA_intron
AC073957.15	1	59	59	0.745763	0.75	0.740363	0.74	50	50	0	0	0	0	0	0	0	antisense
AC074183.4	1	12	12	0.833333	0.83	1	1	10	10	0	0	0	0	0	0	0	lincRNA_exon
AC090587.4	2	72	36	1.84211	0.92	3.03663	1.52	54	27	0	0	0	0	0	0	0	sense_overlapping
AC091729.9	1	21	21	0.857143	0.86	0.954243	0.95	13	13	0	0	0	0	0	0	0	antisense
AC093106.7	1	7	7	1	1	0.845098	0.85	5	5	0	0	0	0	0	0	0	processed_pseudogene
AC093323.3	4	43	7	3.39881	0.87	3.62325	0.81	37	6.5	0	0	0	0	0	0	0	lincRNA_exon
AC093642.5	1	13	13	0.769231	0.77	0.69897	0.7	11	11	0	0	0	0	0	0	0	processed_transcript
AC097523.3	1	13	13	0.615385	0.62	0.60206	0.6	11	11	0	0	0	0	0	0	0	processed_pseudogene
AC113189.5	4	56	12	3.61957	0.88	4.2465	1.05	41	8.5	0	0	0	0	0	0	0	antisense
AC135048.13	1	9	9	0.777778	0.78	0.845098	0.85	8	8	0	0	0	0	0	0	0	processed_transcript
AC138649.1	2	18	9	1.58442	0.79	1.38021	0.69	14	7	0	0	0	0	0	0	0	processed_pseudogene
AC139143.2	1	22	22	0.5	0.5	0.740363	0.74	11	11	0	0	0	0	0	0	0	processed_pseudogene
AC142528.1	1	10	10	0.9	0.9	0.954243	0.95	9	9	0	0	0	0	0	0	0	antisense
ACADVL	1	22	22	0.818182	0.82	0.954243	0.95	19	19	0	0	0	0	1	0	0	start_codon
ACAP3	1	13	13	0.923077	0.92	1.07918	1.08	11	11	0	0	1	0	0	0	0	coding
ACEA_U3	7	1085	107	5.21595	0.76	8.42495	1.17	572	71	0	0	0	0	0	0	0	snoRNA
ACIN1	2	37	18	1.6014	0.8	1.77815	0.89	31	15.5	0	0	0	2	0	0	0	3'utr
ACLY	1	24	24	0.916667	0.92	1.04139	1.04	21	21	1	0	0	0	0	0	0	5'utr
ACOT7	1	11	11	1	1	1.04139	1.04	11	11	1	0	0	0	0	0	0	5'utr
ACOX1	4	56	8	3.39881	0.87	3.90655	0.84	28	7	3	0	0	0	1	0	0	start_codon
ACP1	1	12	12	0.833333	0.83	1	1	9	9	0	0	0	0	1	0	0	start_codon
ACP6	1	7	7	1	1	0.845098	0.85	7	7	1	0	0	0	0	0	0	5'utr
ACSF3	8	107	13	6.76978	0.84	7.56188	1	86	10	0	3	1	2	0	1	0	5'utr-intron
ACSL3	2	42	21	1.74118	0.87	1.90309	0.95	30	15	2	0	0	0	0	0	0	5'utr
ACTB	12	507	10	10.162	0.84	11.9329	0.9	307	9.5	0	0	8	1	1	1	0	3'utr
ACTBP11	2	39	19	1.76207	0.88	2.35218	1.18	20	10	0	0	0	0	0	0	0	processed_pseudogene
ACTBP2	1	16	16	0.6875	0.69	0.740363	0.74	14	14	0	0	0	0	0	0	0	processed_pseudogene
ACTG1	8	317	15	6.55362	0.85	7.60882	1.02	163	14.5	1	0	2	1	0	1	0	3'utr
ACTL6A	1	24	24	0.833333	0.83	1.30103	1.3	24	24	0	0	0	0	0	0	0	5'utr-intron
ACTN4	3	69	11	2.6165	0.86	3.41363	0.95	63	10	0	0	1	1	1	0	0	start_codon
ACTR1B	1	10	10	0.8	0.8	0.90309	0.9	10	10	1	0	0	0	0	0	0	5'utr
ACTR2	1	51	51	0.764706	0.76	0.892095	0.89	46	46	0	0	0	0	1	0	0	start_codon
ACTR3	5	97	15	4.42872	0.9	5.17878	1.11	79	12	4	0	0	0	1	0	0	5'utr
ACTR6	1	8	8	0.875	0.88	0.845098	0.85	7	7	0	0	0	0	1	0	0	start_codon
ACVR2B	1	16	16	0.875	0.88	1.14613	1.15	15	15	1	0	0	0	0	0	0	5'utr
ADAM10	2	16	8	1.71429	0.86	1.65321	0.83	11	5.5	1	0	0	0	0	0	0	coding-intron
ADAM17	1	7	7	0.857143	0.86	0.778151	0.78	7	7	1	0	0	0	0	0	0	5'utr
ADAR	16	460	12	13.9628	0.86	15.2116	0.9	333	11	1	0	7	6	1	0	0	3'utr
ADARB1	3	67	21	2.4359	0.77	2.21307	0.7	42	16	1	0	0	1	0	1	0	5'utr
ADAT3	1	16	16	0.9375	0.94	1.17609	1.18	15	15	0	0	1	0	0	0	0	coding
ADCK2	5	50	10	4.19394	0.82	4.30449	0.9	40	8	1	0	3	0	1	0	0	5'utr
ADCY7	2	21	10	1.92308	0.96	1.98227	0.99	15	7.5	0	0	0	0	0	1	0	5'utr-intron
ADCYAP1	1	7	7	0.714286	0.71	0.69897	0.7	6	6	0	0	1	0	0	0	0	coding
ADD1	1	10	10	0.9	0.9	0.653213	0.65	10	10	1	0	0	0	0	0	0	5'utr
ADIPOR1	1	20	20	0.9	0.9	1.25527	1.26	10	10	1	0	0	0	0	0	0	5'utr
ADM2	1	12	12	0.916667	0.92	0.740363	0.74	9	9	1	0	0	0	0	0	0	5'utr
ADNP	4	77	14	3.3535	0.82	4.07041	1	64	14	2	0	1	1	0	0	0	3'utr
ADNP2	2	32	16	1.68826	0.84	2.24551	1.12	20	10	2	0	0	0	0	0	0	5'utr
ADO	3	131	16	2.51285	0.88	2.902	0.85	99	13	2	0	0	1	0	0	0	5'utr
ADORA2B	2	51	25	1.62727	0.81	2.15836	1.08	40	20	1	0	1	0	0	0	0	5'utr
ADPGK	5	47	9	4.78409	1	4.44279	0.9	39	7	0	1	4	0	0	0	0	intron
ADPRHL2	4	40	9	3.82857	0.96	3.86753	0.95	35	8.5	0	0	1	1	1	0	0	start_codon
ADRBK1	2	17	8	2	1	1.85733	0.93	13	6.5	0	0	1	1	0	0	0	coding
ADRBK2	2	44	22	1.75758	0.88	1.96221	0.98	33	16.5	1	0	0	1	0	0	0	5'utr
ADRM1	1	13	13	0.923077	0.92	0.778151	0.78	13	13	0	0	1	0	0	0	0	coding
AES	9	163	16	7.31233	0.81	8.52564	0.9	121	12	2	0	2	4	1	0	0	3'utr
AFF2	1	19	19	0.842105	0.84	1.20412	1.2	16	16	1	0	0	0	0	0	0	5'utr
AFF4	2	16	8	1.66667	0.83	1.62325	0.81	13	6.5	2	0	0	0	0	0	0	5'utr
AFG3L2	1	12	12	0.916667	0.92	1.04139	1.04	11	11	0	0	0	0	1	0	0	start_codon
AFTPH	1	7	7	1	1	0.845098	0.85	6	6	1	0	0	0	0	0	0	5'utr
AGAP1	1	7	7	0.857143	0.86	0.778151	0.78	7	7	0	1	0	0	0	0	0	intron
AGAP2	2	16	8	1.875	0.94	1.74819	0.87	13	6.5	0	0	1	1	0	0	0	3'utr
AGAP3	1	9	9	0.888889	0.89	0.60206	0.6	8	8	0	0	0	0	0	0	0	processed_transcript
AGFG1	3	57	16	2.68939	0.88	2.88053	0.85	37	15	2	0	0	0	1	0	0	5'utr
AGGF1	3	47	16	2.50238	0.8	2.98227	1.08	42	15	3	0	0	0	0	0	0	5'utr
AGO2	1	48	48	0.75	0.75	0.857332	0.86	41	41	1	0	0	0	0	0	0	5'utr
AGO3	1	7	7	1	1	0.845098	0.85	6	6	1	0	0	0	0	0	0	5'utr
AGPAT1	2	21	10	1.64286	0.82	1.81291	0.91	19	9.5	1	0	1	0	0	0	0	coding
AGPAT5	1	11	11	0.909091	0.91	1	1	11	11	0	0	1	0	0	0	0	coding
AGPAT6	3	37	12	2.38095	0.71	2.85733	1.08	34	11	1	0	0	2	0	0	0	5'utr
AGPS	1	7	7	1	1	0.845098	0.85	7	7	0	0	1	0	0	0	0	coding
AHCYL1	3	55	17	2.42979	0.81	2.16633	0.7	37	14	2	0	1	0	0	0	0	5'utr
AHDC1	14	190	12	11.9999	0.88	11.9957	0.85	159	9.5	1	0	11	0	1	0	0	coding
AHI1	1	13	13	0.692308	0.69	0.954243	0.95	7	7	1	0	0	0	0	0	0	5'utr
AHSA1	3	63	20	2.54333	0.83	2.95545	0.88	48	16	2	0	1	0	0	0	0	5'utr
AHSA2	1	7	7	0.857143	0.86	0.778151	0.78	6	6	1	0	0	0	0	0	0	5'utr
AIDA	1	16	16	0.75	0.75	0.60206	0.6	15	15	0	0	0	0	0	0	0	processed_transcript
AIF1	1	34	34	0.764706	0.76	0.937852	0.94	33	33	0	0	0	0	1	0	0	start_codon
AIMP2	1	12	12	0.666667	0.67	0.60206	0.6	8	8	1	0	0	0	0	0	0	5'utr
AIP	2	51	25	1.8141	0.91	2.58546	1.29	33	16.5	1	0	0	0	1	0	0	5'utr
AJ003147.9	1	524	524	0.891221	0.89	1.4652	1.47	36	36	0	0	0	0	0	0	0	antisense
AJUBA	2	17	8	1.6	0.8	1.62325	0.81	12	6	0	0	1	1	0	0	0	3'utr
AK3	1	14	14	0.928571	0.93	1.11394	1.11	11	11	1	0	0	0	0	0	0	5'utr
AKAP13	1	8	8	0.875	0.88	0.845098	0.85	7	7	0	0	0	1	0	0	0	3'utr
AKAP17A	1	18	18	0.833333	0.83	1.17609	1.18	16	16	1	0	0	0	0	0	0	5'utr
AKAP2	1	17	17	0.941176	0.94	1.20412	1.2	15	15	0	0	1	0	0	0	0	coding
AKIRIN1	2	56	28	1.65909	0.83	2.25527	1.13	43	21.5	0	0	1	0	1	0	0	start_codon
AKIRIN2	4	172	25	3.33886	0.83	5.03822	1.26	119	19.5	4	0	0	0	0	0	0	5'utr
AKNA	4	53	13	3.40227	0.84	3.04922	0.72	48	11	2	0	1	0	1	0	0	coding
AKR1A1	3	30	8	2.40714	0.8	2.63548	0.78	23	6	2	0	0	0	0	0	0	5'utr-intron
AKR1B1	1	10	10	1	1	1	1	9	9	0	0	0	0	1	0	0	start_codon
AKR7A2	2	36	18	1.70769	0.85	1.6744	0.84	32	16	0	0	2	0	0	0	0	coding
AKT1	2	34	17	1.63333	0.82	1.30103	0.65	30	15	1	1	0	0	0	0	0	intron
AKT2	7	107	15	6.07246	0.87	6.45725	0.85	102	14	1	0	0	6	0	0	0	3'utr
ALAD	1	8	8	1	1	0.90309	0.9	4	4	1	0	0	0	0	0	0	5'utr
ALAS1	2	26	13	1.70833	0.85	2.02119	1.01	20	10	2	0	0	0	0	0	0	5'utr
ALDH5A1	2	34	17	1.68571	0.84	2.29667	1.15	26	13	0	0	2	0	0	0	0	coding
ALDOA	3	106	12	2.48374	0.82	2.91862	0.95	84	12	1	0	0	0	1	0	0	5'utr
ALG5	1	9	9	1	1	0.954243	0.95	9	9	1	0	0	0	0	0	0	5'utr
ALKBH2	2	28	14	1.52381	0.76	1.60206	0.8	25	12.5	2	0	0	0	0	0	0	5'utr
ALKBH3	2	55	27	1.8125	0.91	1.95904	0.98	35	17.5	2	0	0	0	0	0	0	5'utr
ALKBH5	9	451	14	7.97761	0.89	9.26528	0.95	303	10	0	0	6	2	1	0	0	start_codon
ALKBH7	1	7	7	1	1	0.845098	0.85	6	6	0	0	0	0	1	0	0	start_codon
ALMS1	1	11	11	0.727273	0.73	0.60206	0.6	10	10	0	0	1	0	0	0	0	coding
ALYREF	4	54	13	3.40307	0.85	4.15473	1.04	38	9	0	0	2	1	1	0	0	3'utr
AMH	11	153	12	9.7551	0.89	10.0867	0.9	126	9	0	0	8	0	0	1	0	coding
AMMECR1L	2	36	18	1.74074	0.87	1.65321	0.83	30	15	1	0	0	1	0	0	0	3'utr
AMOTL1	2	20	10	1.90909	0.95	1.95424	0.98	17	8.5	2	0	0	0	0	0	0	5'utr
AMPD2	4	66	16	3.5496	0.92	4.52009	1.13	55	13.5	4	0	0	0	0	0	0	5'utr
AMZ2	1	109	109	0.954128	0.95	1.53991	1.54	85	85	0	0	0	0	0	0	0	5'utr-intron
AMZ2P1	1	17	17	0.823529	0.82	1.14613	1.15	15	15	0	0	0	0	0	0	0	processed_transcript
ANAPC11	3	75	23	2.6388	0.87	3.29667	1.08	47	15	2	0	0	0	0	0	0	5'utr
ANAPC13	3	57	20	2.6619	0.9	3.18639	1.2	47	18	1	0	0	0	0	0	0	5'utr
ANAPC16	1	34	34	0.852941	0.85	1.4624	1.46	24	24	0	0	0	0	0	0	0	5'utr-intron
ANGEL1	1	8	8	0.75	0.75	0.778151	0.78	8	8	0	0	1	0	0	0	0	coding
ANKH	5	76	14	4.07341	0.88	4.68604	0.9	54	8	3	1	1	0	0	0	0	coding
ANKHD1	3	63	18	1.7299	0.48	2.60206	0.7	51	17	0	0	3	0	0	0	0	coding
ANKHD1-EIF4EBP3	2	48	24	1.48319	0.74	2.09342	1.05	38	19	1	0	1	0	0	0	0	5'utr
ANKIB1	2	23	11	1.90909	0.95	2.07918	1.04	21	10.5	2	0	0	0	0	0	0	5'utr
ANKLE2	2	129	64	1.73051	0.87	2.41036	1.21	96	48	0	0	1	0	1	0	0	coding
ANKRA2	1	17	17	0.764706	0.76	1.11394	1.11	11	11	1	0	0	0	0	0	0	5'utr
ANKRD10	5	212	15	4.46363	1	5.20754	1	157	14	0	0	3	0	1	1	0	stop_codon
ANKRD11	18	664	25	15.391	0.86	17.9319	0.99	441	13	3	1	11	2	1	0	0	3'utr
ANKRD13A	1	7	7	0.833333	0.83	0.69897	0.7	6	6	1	0	0	0	0	0	0	5'utr
ANKRD13B	2	22	11	1.81667	0.91	1.99564	1	18	9	0	0	0	0	0	0	0	retained_intron
ANKRD13D	6	104	13	4.46719	0.79	5.27646	0.87	89	12	5	1	0	0	0	0	0	5'utr
ANKRD16	2	28	14	1.875	0.94	2.14613	1.07	21	10.5	2	0	0	0	0	0	0	5'utr
ANKRD17	1	10	10	1	1	1	1	7	7	0	0	1	0	0	0	0	coding
ANKRD18DP	1	11	11	0.909091	0.91	1	1	9	9	0	0	0	0	0	0	0	processed_transcript
ANKRD33B	2	16	8	1.4127	0.71	1.47712	0.74	16	8	0	0	0	0	0	0	0	nonsense_mediated_decay
ANKRD50	1	9	9	0.888889	0.89	0.90309	0.9	9	9	1	0	0	0	0	0	0	5'utr
ANKRD54	1	9	9	0.777778	0.78	0.845098	0.85	8	8	0	0	1	0	0	0	0	coding
ANKS6	1	8	8	1	1	0.90309	0.9	6	6	0	0	1	0	0	0	0	coding
ANO6	2	20	10	1.79798	0.9	1.90309	0.95	16	8	2	0	0	0	0	0	0	5'utr
ANP32A	4	192	35	3.06566	0.87	4.79438	1.14	121	19	1	0	1	1	1	0	0	3'utr
ANP32AP1	1	10	10	0.7	0.7	0.845098	0.85	10	10	0	0	0	0	0	0	0	processed_transcript
ANP32B	4	150	25	2.782	0.69	3.92363	1	101	21	3	0	1	0	0	0	0	5'utr
ANP32E	4	157	31	3.34326	0.83	4.11051	1.03	137	29.5	4	0	0	0	0	0	0	5'utr
ANTXR2	4	40	10	3.91667	1	3.90352	0.97	34	8	3	0	0	0	1	0	0	start_codon
ANXA11	1	11	11	0.909091	0.91	1	1	10	10	1	0	0	0	0	0	0	5'utr
ANXA2R	1	8	8	1	1	0.90309	0.9	7	7	0	0	1	0	0	0	0	coding
ANXA6	1	10	10	0.9	0.9	0.954243	0.95	7	7	1	0	0	0	0	0	0	5'utr
AP1AR	1	21	21	1	1	1.32222	1.32	14	14	1	0	0	0	0	0	0	5'utr
AP1M1	1	7	7	0.714286	0.71	0.69897	0.7	6	6	1	0	0	0	0	0	0	5'utr
AP1S1	7	63	8	6.62103	1	6.3749	0.9	57	8	1	1	1	3	0	1	0	5'utr
AP2A1	1	7	7	1	1	0.845098	0.85	7	7	1	0	0	0	0	0	0	5'utr
AP2B1	1	10	10	0.9	0.9	0.653213	0.65	7	7	0	1	0	0	0	0	0	intron
AP2M1	2	32	16	1.5	0.75	1.72016	0.86	24	12	1	0	0	0	0	0	0	5'utr
AP2S1	1	58	58	0.844828	0.84	0.787106	0.79	44	44	1	0	0	0	0	0	0	5'utr
AP3D1	1	25	25	0.8	0.8	1.30103	1.3	23	23	1	0	0	0	0	0	0	5'utr
AP3M2	1	7	7	0.857143	0.86	0.778151	0.78	7	7	0	0	1	0	0	0	0	coding
AP5M1	2	42	21	1.97143	0.99	2.37658	1.19	16	8	1	0	1	0	0	0	0	5'utr
APAF1	1	11	11	1	1	1.04139	1.04	6	6	1	0	0	0	0	0	0	5'utr
APBA2	1	10	10	1	1	1	1	10	10	1	0	0	0	0	0	0	5'utr
APBA3	1	13	13	1	1	1.11394	1.11	12	12	1	0	0	0	0	0	0	5'utr
APBB3	1	8	8	0.75	0.75	0.778151	0.78	8	8	1	0	0	0	0	0	0	5'utr
APEX1	4	248	46	3.56664	0.89	4.86753	1.14	167	35.5	0	0	1	0	1	0	0	5'utr-intron
APEX2	2	27	13	1.94737	0.97	2.15836	1.08	14	7	0	0	2	0	0	0	0	coding
APH1A	6	138	22	5.10424	0.85	6.41471	1.09	96	14	1	0	2	2	0	1	0	3'utr
API5	1	16	16	0.75	0.75	1.07918	1.08	13	13	1	0	0	0	0	0	0	5'utr
APITD1-CORT	1	33	33	0.969697	0.97	1.50515	1.51	20	20	1	0	0	0	0	0	0	5'utr
APMAP	1	7	7	0.714286	0.71	0.69897	0.7	5	5	0	0	0	0	1	0	0	start_codon
APOBEC3D	1	17	17	0.882353	0.88	1.17609	1.18	15	15	0	0	0	1	0	0	0	3'utr
APOL2	3	76	31	2.58423	0.89	3.10721	0.9	60	20	2	0	0	0	0	0	0	5'utr
APOL4	1	13	13	0.923077	0.92	0.778151	0.78	5	5	0	0	0	1	0	0	0	3'utr
APOL6	3	61	16	2.32386	0.73	3.12057	1	52	15	0	0	0	2	1	0	0	start_codon
APOO	1	14	14	0.928571	0.93	1.11394	1.11	11	11	0	1	0	0	0	0	0	intron
APPBP2	1	12	12	0.833333	0.83	1	1	11	11	1	0	0	0	0	0	0	5'utr
APPL1	1	8	8	0.875	0.88	0.845098	0.85	6	6	1	0	0	0	0	0	0	5'utr
APTX	1	8	8	0.875	0.88	0.845098	0.85	7	7	0	0	0	0	0	0	0	processed_transcript
ARC	1	7	7	0.714286	0.71	0.69897	0.7	7	7	0	0	0	0	1	0	0	start_codon
ARCN1	1	8	8	1	1	0.90309	0.9	7	7	1	0	0	0	0	0	0	5'utr
AREL1	1	7	7	0.857143	0.86	0.778151	0.78	6	6	0	0	0	1	0	0	0	3'utr
ARF1	6	82	11	5.09612	0.88	5.1486	0.86	68	10	0	0	1	3	1	0	0	5'utr-intron
ARF3	3	180	37	2.51103	0.81	3.42033	1.07	137	31	1	1	0	1	0	0	0	3'utr
ARF4	1	7	7	0.714286	0.71	0.69897	0.7	6	6	0	0	0	1	0	0	0	3'utr
ARF5	2	53	26	1.73023	0.87	2.20412	1.1	44	22	0	0	0	1	1	0	0	start_codon
ARF6	7	979	98	5.97397	0.85	8.42021	1.27	546	61	3	0	2	1	0	0	0	5'utr
ARFGAP1	5	59	11	4.39874	0.89	4.39704	0.85	54	11	0	0	0	5	0	0	0	3'utr
ARFGEF1	2	15	7	2	1	1.74819	0.87	14	7	2	0	0	0	0	0	0	5'utr
ARGLU1	2	73	36	1.77466	0.89	2.18564	1.09	50	25	1	0	0	0	1	0	0	start_codon
ARHGAP1	1	9	9	0.888889	0.89	0.90309	0.9	8	8	0	0	0	1	0	0	0	3'utr
ARHGAP11A	6	128	13	5.29556	0.88	5.82592	0.9	96	12	5	0	0	0	1	0	0	5'utr
ARHGAP11B	4	63	12	3.32878	0.87	3.62325	0.87	49	8.5	3	0	0	0	0	0	0	nonsense_mediated_decay
ARHGAP17	1	16	16	0.75	0.75	0.778151	0.78	16	16	0	0	0	0	0	0	0	nonsense_mediated_decay
ARHGAP27	1	12	12	0.916667	0.92	1.04139	1.04	10	10	0	0	0	0	0	1	0	stop_codon
ARHGAP30	8	240	10	6.58554	0.85	7.35371	0.84	141	9	3	0	3	1	1	0	0	3'utr
ARHGAP33	1	14	14	1	1	1.14613	1.15	5	5	0	0	1	0	0	0	0	coding
ARHGAP35	2	15	7	1.875	0.94	1.6902	0.85	13	6.5	0	0	0	2	0	0	0	3'utr
ARHGDIA	4	57	12	3.25663	0.84	3.17173	0.76	52	10.5	0	1	1	2	0	0	0	3'utr
ARHGDIB	1	11	11	0.818182	0.82	0.954243	0.95	10	10	0	0	1	0	0	0	0	coding
ARHGEF1	12	167	10	9.83385	0.82	10.5312	0.85	126	9	1	3	6	2	0	0	0	5'utr
ARHGEF2	2	32	16	1.81714	0.91	2.15836	1.08	21	10.5	1	0	1	0	0	0	0	coding
ARHGEF3	2	19	9	1.78409	0.89	1.8451	0.92	15	7.5	1	0	1	0	0	0	0	coding
ARHGEF7	2	48	24	1.67143	0.84	1.81403	0.91	29	14.5	1	0	1	0	0	0	0	5'utr
ARID1A	16	673	21	12.4133	0.82	14.3975	0.85	373	14.5	2	0	12	1	1	0	0	5'utr
ARID2	1	9	9	1	1	0.954243	0.95	9	9	1	0	0	0	0	0	0	5'utr
ARID4B	1	13	13	0.923077	0.92	1.07918	1.08	11	11	1	0	0	0	0	0	0	5'utr
ARIH1	3	61	25	2.09077	0.73	2.0727	0.67	59	25	1	0	1	0	1	0	0	5'utr
ARIH2	1	35	35	0.685714	0.69	0.90309	0.9	33	33	1	0	0	0	0	0	0	5'utr
ARL1	1	8	8	1	1	0.90309	0.9	6	6	1	0	0	0	0	0	0	5'utr
ARL13B	2	56	28	1.7	0.85	2.0569	1.03	46	23	2	0	0	0	0	0	0	5'utr
ARL14EP	1	13	13	1	1	1.11394	1.11	12	12	1	0	0	0	0	0	0	5'utr
ARL2BP	2	33	16	1.64286	0.82	1.75333	0.88	29	14.5	2	0	0	0	0	0	0	5'utr
ARL4C	8	216	16	6.89018	0.85	7.542	0.85	135	14	3	0	2	3	0	0	0	3'utr
ARL5A	1	14	14	0.857143	0.86	0.778151	0.78	13	13	1	0	0	0	0	0	0	5'utr
ARL5B	2	196	98	1.78056	0.89	2.27913	1.14	92	46	2	0	0	0	0	0	0	5'utr
ARL6IP1	2	114	57	1.87129	0.94	2.28027	1.14	99	49.5	0	0	1	0	1	0	0	coding
ARL6IP4	2	17	8	1.88889	0.94	1.80618	0.9	12	6	0	0	1	0	0	0	0	coding-intron
ARL6IP6	1	10	10	0.8	0.8	0.60206	0.6	10	10	0	0	1	0	0	0	0	coding
ARL8B	2	31	15	1.94118	0.97	2.35025	1.18	27	13.5	2	0	0	0	0	0	0	5'utr
ARMC1	1	47	47	0.893617	0.89	1.02119	1.02	26	26	1	0	0	0	0	0	0	5'utr
ARMC10	3	91	35	2.4689	0.81	2.85934	1	68	23	1	0	1	0	1	0	0	5'utr
ARMC10P1	1	25	25	0.92	0.92	1.0607	1.06	19	19	0	0	0	0	0	0	0	processed_pseudogene
ARMC6	2	19	9	1.63095	0.82	1.43933	0.72	18	9	0	0	1	0	0	0	0	5'utr-intron
ARMC7	4	72	16	3.38124	0.86	3.77486	0.86	56	14.5	2	0	1	0	1	0	0	5'utr
ARMCX3	4	98	17	3.41832	0.87	4.11261	1.02	54	13	2	0	0	0	1	0	0	5'utr
ARMCX4	1	11	11	0.818182	0.82	0.653213	0.65	7	7	0	0	0	0	0	0	0	nonsense_mediated_decay
ARMCX6	3	27	9	2.4733	0.86	2.58433	0.9	26	8	3	0	0	0	0	0	0	5'utr
ARPC1A	1	22	22	0.863636	0.86	1.27875	1.28	10	10	1	0	0	0	0	0	0	5'utr
ARPC1B	2	64	32	1.45455	0.73	1.87506	0.94	24	12	2	0	0	0	0	0	0	5'utr
ARPC2	3	187	14	2.64123	0.88	3.49831	1.08	106	13	1	0	0	0	0	0	0	5'utr
ARPC3	1	13	13	0.923077	0.92	0.778151	0.78	11	11	0	0	0	0	1	0	0	start_codon
ARPC5	2	154	77	1.85054	0.93	2.57749	1.29	126	63	0	0	1	0	1	0	0	coding
ARPC5L	5	154	30	4.37529	0.85	5.73953	1.1	123	26	1	0	2	1	1	0	0	5'utr
ARPP19	2	34	17	1.64427	0.82	1.93197	0.97	26	13	1	0	0	0	0	0	0	5'utr
ARRB1	1	11	11	0.818182	0.82	0.653213	0.65	8	8	0	0	0	0	1	0	0	start_codon
ARRDC1	1	7	7	0.857143	0.86	0.778151	0.78	7	7	0	0	1	0	0	0	0	coding
ARRDC1-AS1	3	25	8	2.63889	0.89	2.58433	0.9	24	8	0	0	0	0	0	0	0	antisense
ARRDC2	1	8	8	0.875	0.88	0.845098	0.85	7	7	1	0	0	0	0	0	0	5'utr
ASAP1	1	9	9	0.666667	0.67	0.778151	0.78	9	9	0	1	0	0	0	0	0	intron
ASB1	3	45	11	2.50985	0.82	3.18724	0.95	41	11	1	0	0	2	0	0	0	5'utr
ASB6	3	43	12	2.73485	0.92	2.72263	0.9	37	10	2	0	1	0	0	0	0	coding
ASB7	2	24	12	1.48571	0.74	1.58546	0.79	19	9.5	2	0	0	0	0	0	0	5'utr
ASCC3	1	17	17	0.705882	0.71	0.60206	0.6	16	16	1	0	0	0	0	0	0	5'utr
ASF1A	2	106	53	1.46465	0.73	2.12494	1.06	80	40	1	0	1	0	0	0	0	5'utr
ASF1B	3	41	16	2.8125	1	2.73719	0.85	32	10	2	0	0	1	0	0	0	3'utr
ASIC2	2	23	11	2	1	2.12057	1.06	18	9	0	2	0	0	0	0	0	intron
ASNA1	1	15	15	0.866667	0.87	0.636822	0.64	14	14	0	0	0	0	1	0	0	start_codon
ASPM	2	25	12	1.51299	0.76	1.34242	0.67	21	10.5	2	0	0	0	0	0	0	5'utr
ASRGL1	2	23	11	2	1	2.12057	1.06	20	10	1	1	0	0	0	0	0	5'utr
ASUN	1	8	8	1	1	0.90309	0.9	8	8	1	0	0	0	0	0	0	5'utr
ASXL1	6	75	11	4.59724	0.79	5.34588	0.9	60	10.5	2	0	2	1	0	0	0	5'utr
ATAD2	1	9	9	0.777778	0.78	0.845098	0.85	8	8	0	0	1	0	0	0	0	coding
ATAD2B	2	19	9	1.75	0.88	1.81954	0.91	16	8	2	0	0	0	0	0	0	5'utr
ATAD3A	2	23	11	1.92308	0.96	1.77815	0.89	16	8	2	0	0	0	0	0	0	5'utr
ATF1	3	60	11	2.50396	0.8	2.79239	0.9	51	10	0	0	0	0	0	0	0	nonsense_mediated_decay
ATF2	1	11	11	0.727273	0.73	0.60206	0.6	11	11	1	0	0	0	0	0	0	5'utr
ATF3	2	54	27	1.75987	0.88	2.36922	1.18	36	18	2	0	0	0	0	0	0	5'utr
ATF4	6	306	17	4.60968	0.8	5.63811	0.85	167	14.5	2	0	3	1	0	0	0	5'utr
ATF4P4	1	9	9	0.777778	0.78	0.845098	0.85	9	9	0	0	0	0	0	0	0	processed_transcript
ATF7IP2	1	7	7	0.857143	0.86	0.778151	0.78	7	7	1	0	0	0	0	0	0	5'utr
ATG101	6	190	13	5.55643	1	6.30912	0.99	147	10.5	3	0	1	0	1	0	0	5'utr
ATG13	1	20	20	0.85	0.85	1.23045	1.23	13	13	1	0	0	0	0	0	0	5'utr
ATG3	1	108	108	0.824074	0.82	1.17124	1.17	59	59	1	0	0	0	0	0	0	5'utr
ATG4B	3	28	8	2.62637	0.86	2.68124	0.9	24	6	0	0	0	3	0	0	0	3'utr
ATG4C	1	9	9	1	1	0.954243	0.95	9	9	1	0	0	0	0	0	0	5'utr
ATG4D	3	58	14	2.43529	0.74	2.78711	0.85	44	10	2	0	0	0	1	0	0	5'utr
ATG5	2	84	42	1.58333	0.79	2.12057	1.06	67	33.5	1	0	0	0	1	0	0	start_codon
ATL3	2	49	24	1.7381	0.87	1.85934	0.93	39	19.5	2	0	0	0	0	0	0	5'utr
ATM	1	14	14	0.928571	0.93	1.11394	1.11	10	10	1	0	0	0	0	0	0	5'utr
ATMIN	1	14	14	0.857143	0.86	1.07918	1.08	12	12	0	0	1	0	0	0	0	coding
ATN1	3	380	141	2.32369	0.81	3.27072	1.1	233	68	0	3	0	0	0	0	0	intron
ATP11A	1	10	10	0.9	0.9	0.954243	0.95	9	9	0	0	0	0	1	0	0	start_codon
ATP11B	1	9	9	0.888889	0.89	0.60206	0.6	8	8	1	0	0	0	0	0	0	5'utr
ATP13A2	1	17	17	0.647059	0.65	1.04139	1.04	14	14	1	0	0	0	0	0	0	5'utr
ATP13A3	4	68	16	3.28009	0.81	4.14656	1.08	48	11.5	0	4	0	0	0	0	0	intron
ATP1A1	2	64	32	1.72041	0.86	2.03141	1.02	47	23.5	1	0	0	0	0	0	0	retained_intron
ATP1B3	1	12	12	0.666667	0.67	0.60206	0.6	12	12	1	0	0	0	0	0	0	5'utr
ATP2A2	5	490	65	3.75045	0.73	5.56459	1.05	267	45	5	0	0	0	0	0	0	5'utr
ATP2A3	8	98	10	6.81334	0.87	7.02589	0.93	79	8.5	1	0	3	4	0	0	0	3'utr
ATP2B4	1	8	8	0.875	0.88	0.845098	0.85	4	4	1	0	0	0	0	0	0	5'utr
ATP5A1	3	102	25	2.72308	0.92	4.08264	1.38	65	23	0	1	0	0	0	0	0	intron
ATP5B	3	68	17	2.57105	0.86	2.91169	0.93	53	9	0	0	2	0	1	0	0	coding
ATP5C1	1	12	12	0.833333	0.83	1	1	11	11	0	0	1	0	0	0	0	coding
ATP5D	1	51	51	0.823529	0.82	1.14613	1.15	46	46	0	0	0	0	1	0	0	start_codon
ATP5E	2	22	11	1.85714	0.93	1.68124	0.84	21	10.5	0	0	1	0	1	0	0	coding
ATP5EP2	1	9	9	0.777778	0.78	0.845098	0.85	8	8	0	0	0	0	1	0	0	start_codon
ATP5G1	2	20	10	1.92308	0.96	1.62325	0.81	19	9.5	0	0	1	1	0	0	0	coding
ATP5G2	4	145	30	3.23251	0.83	3.71184	0.92	123	28.5	0	0	2	0	1	1	0	stop_codon
ATP5G3	2	44	22	1.29412	0.65	1.52827	0.76	40	20	1	0	0	1	0	0	0	3'utr
ATP5H	1	7	7	1	1	0.845098	0.85	6	6	0	0	1	0	0	0	0	coding
ATP5I	3	49	15	2.55441	0.87	3.06819	0.95	33	11	0	0	0	0	1	1	0	stop_codon
ATP5J	3	115	13	2.55142	0.85	3.23544	1.04	91	11	2	0	1	0	0	0	0	coding
ATP5L	1	33	33	0.606061	0.61	0.823909	0.82	28	28	1	0	0	0	0	0	0	5'utr
ATP5O	1	10	10	1	1	1	1	9	9	0	0	0	0	1	0	0	start_codon
ATP6AP1	1	10	10	0.9	0.9	0.653213	0.65	8	8	0	0	1	0	0	0	0	coding
ATP6AP2	1	14	14	0.785714	0.79	1.04139	1.04	12	12	1	0	0	0	0	0	0	5'utr
ATP6V0B	3	111	15	2.44773	0.8	2.50152	0.85	76	11	1	0	1	0	0	0	0	5'utr
ATP6V0C	4	109	13	3.34429	0.83	3.92833	0.98	74	10	1	0	0	2	0	0	0	5'utr
ATP6V0E1	1	35	35	0.914286	0.91	1.20412	1.2	24	24	0	0	0	0	1	0	0	start_codon
ATP6V0E2	1	7	7	0.857143	0.86	0.778151	0.78	6	6	0	0	0	0	1	0	0	start_codon
ATP6V1C1	1	8	8	0.875	0.88	0.845098	0.85	8	8	1	0	0	0	0	0	0	5'utr
ATP6V1D	1	10	10	0.5	0.5	0.69897	0.7	9	9	1	0	0	0	0	0	0	5'utr
ATP6V1F	1	20	20	0.9	0.9	0.954243	0.95	15	15	0	0	0	0	1	0	0	start_codon
ATP6V1H	1	36	36	0.888889	0.89	1.20412	1.2	34	34	1	0	0	0	0	0	0	5'utr
ATPAF1	2	25	12	1.66667	0.83	1.716	0.86	23	11.5	0	0	2	0	0	0	0	coding
ATPIF1	2	54	27	1.45517	0.73	1.80163	0.9	38	19	0	0	2	0	0	0	0	coding
ATXN1L	1	32	32	0.8125	0.81	1.11394	1.11	27	27	1	0	0	0	0	0	0	5'utr
ATXN2	1	9	9	0.888889	0.89	0.90309	0.9	7	7	0	0	1	0	0	0	0	coding
ATXN2L	6	80	9	4.89603	0.82	5.50097	0.85	58	7.5	1	1	2	0	1	0	0	retained_intron
ATXN7L3	10	222	11	8.30969	0.85	9.39704	0.84	162	10	0	0	0	4	0	0	0	3'utr
AUP1	4	36	9	3.41414	0.89	3.49638	0.87	30	8	1	0	2	1	0	0	0	3'utr
AURKA	3	32	12	2.83974	0.92	2.96567	1.04	28	11	3	0	0	0	0	0	0	5'utr
AURKAIP1	9	235	22	8.12312	0.91	10.0727	1	166	18	4	0	3	0	0	0	0	coding
AURKB	2	19	9	1.78889	0.89	1.5563	0.78	19	9.5	0	0	1	0	0	1	0	stop_codon
AUTS2	6	62	9	5.29937	0.89	5.67247	0.9	51	8	0	6	0	0	0	0	0	intron
AVL9	1	28	28	0.964286	0.96	1.13033	1.13	16	16	0	0	0	0	0	0	0	processed_transcript
AXIN1	3	144	12	2.50648	0.83	2.64062	0.78	115	11	0	1	1	0	0	0	0	coding
AZI2	3	101	19	2.72118	0.92	2.92869	0.95	62	12	3	0	0	0	0	0	0	5'utr
AZIN1	3	83	22	2.67273	0.9	3.32991	1.28	75	22	3	0	0	0	0	0	0	5'utr
B2M	6	372	25	5.22211	0.88	7.64583	1.12	172	23.5	0	0	0	2	1	2	0	start_codon
B3GALNT2	2	38	19	1.83473	0.92	1.87506	0.94	33	16.5	1	0	1	0	0	0	0	coding
B3GALT6	17	351	15	14.0824	0.82	15.8587	0.95	293	11	0	0	12	5	0	0	0	coding
B3GAT1	1	10	10	0.8	0.8	0.60206	0.6	9	9	1	0	0	0	0	0	0	5'utr
B3GAT3	3	29	10	2.75	1	2.49831	0.85	25	9	0	0	1	1	1	0	0	3'utr
B3GNT1	3	61	23	2.29379	0.8	2.65386	0.9	49	19	2	0	1	0	0	0	0	coding
B3GNTL1	1	7	7	1	1	0.845098	0.85	6	6	0	0	0	0	0	1	0	stop_codon
B4GALNT1	2	25	12	1.86667	0.93	1.81291	0.91	14	7	2	0	0	0	0	0	0	5'utr
B4GALT1	1	7	7	0.857143	0.86	0.778151	0.78	7	7	1	0	0	0	0	0	0	5'utr
B4GALT3	1	28	28	0.857143	0.86	1.38021	1.38	22	22	1	0	0	0	0	0	0	5'utr
B4GALT4	1	10	10	0.6	0.6	0.778151	0.78	10	10	1	0	0	0	0	0	0	5'utr
B4GALT5	1	9	9	0.888889	0.89	0.90309	0.9	8	8	0	0	1	0	0	0	0	coding
B4GALT6	1	7	7	0.857143	0.86	0.778151	0.78	7	7	1	0	0	0	0	0	0	5'utr
B4GALT7	1	12	12	0.916667	0.92	1.04139	1.04	9	9	0	0	0	1	0	0	0	3'utr
B9D2	1	10	10	0.8	0.8	0.60206	0.6	7	7	1	0	0	0	0	0	0	5'utr
BACH1	3	50	16	2.66827	0.94	2.75587	0.9	39	9	1	2	0	0	0	0	0	5'utr
BACH2	20	476	10	16.5733	0.86	19.1179	0.93	333	9.5	3	2	10	4	0	1	0	3'utr
BAG1	2	35	17	1.86742	0.93	2.36173	1.18	18	9	0	0	1	0	0	0	0	coding
BAG2	2	33	16	1.77068	0.89	1.716	0.86	24	12	2	0	0	0	0	0	0	5'utr
BAG3	3	54	16	2.46795	0.83	3.13988	1.08	44	15	3	0	0	0	0	0	0	5'utr
BAG4	1	12	12	0.916667	0.92	1.04139	1.04	8	8	0	0	0	0	1	0	0	start_codon
BAG5	1	15	15	0.933333	0.93	1.14613	1.15	10	10	0	1	0	0	0	0	0	intron
BAG6	2	17	8	2	1	1.8451	0.92	16	8	1	0	0	0	0	0	0	5'utr-intron
BAHD1	2	18	9	1.67532	0.84	1.73239	0.87	18	9	0	0	0	2	0	0	0	3'utr
BAIAP2-AS1	4	45	12	2.85365	0.72	3.25527	0.8	37	9	0	0	0	0	0	0	0	lincRNA_exon
BAK1	2	19	9	1.54762	0.77	1.39794	0.7	19	9.5	2	0	0	0	0	0	0	5'utr
BANF1	1	29	29	0.862069	0.86	1.09691	1.1	20	20	0	0	0	0	0	0	0	5'utr-intron
BANF1P3	1	20	20	0.9	0.9	1.25527	1.26	20	20	0	0	0	0	0	0	0	processed_pseudogene
BAP1	5	61	8	4.59578	0.88	4.40715	0.9	54	7	1	0	2	1	1	0	0	3'utr
BATF3	1	46	46	0.956522	0.96	1.34242	1.34	36	36	1	0	0	0	0	0	0	5'utr
BAX	2	37	18	1.72381	0.86	1.89209	0.95	31	15.5	0	0	0	0	1	1	0	start_codon
BAZ1A	2	21	10	1.52778	0.76	1.49831	0.75	19	9.5	2	0	0	0	0	0	0	5'utr
BAZ1B	3	73	15	2.51111	0.84	3.09167	1.11	56	13	2	0	0	0	1	0	0	start_codon
BCAS2	1	36	36	0.916667	0.92	1.21748	1.22	33	33	0	0	1	0	0	0	0	coding
BCL10	1	14	14	0.857143	0.86	1.07918	1.08	13	13	1	0	0	0	0	0	0	5'utr
BCL2	7	129	10	6.6452	1	7.24472	1	107	9	4	0	1	2	0	0	0	3'utr
BCL2L1	5	58	11	4.1926	0.86	4.2307	0.78	52	11	4	0	0	1	0	0	0	3'utr
BCL2L12	2	24	12	1.8125	0.91	2.01703	1.01	24	12	0	0	2	0	0	0	0	coding
BCL2L14	4	425	19	2.17212	0.53	3.53081	0.83	132	12	0	0	0	0	0	0	0	nonsense_mediated_decay
BCL7A	4	61	14	3.37789	0.85	4.27501	1.03	40	9	1	0	0	3	0	0	0	5'utr
BCL7B	3	43	13	2.34615	0.85	2.77379	0.95	33	10	1	0	0	2	0	0	0	3'utr
BCL9	1	10	10	1	1	1	1	9	9	1	0	0	0	0	0	0	5'utr
BCL9L	3	30	8	2.85714	1	2.85733	0.9	16	5	1	0	1	1	0	0	0	3'utr
BCLAF1	1	26	26	0.846154	0.85	1.34242	1.34	23	23	1	0	0	0	0	0	0	5'utr
BCOR	6	134	18	5.15398	0.85	5.08792	0.77	106	13.5	0	6	0	0	0	0	0	intron
BCR	3	49	10	2.48468	0.88	2.5397	0.85	28	10	1	0	1	0	1	0	0	5'utr
BDNF-AS	1	25	25	0.96	0.96	1.38021	1.38	12	12	0	0	0	0	0	0	0	antisense
BEND4	1	10	10	1	1	1	1	9	9	0	0	1	0	0	0	0	coding
BEND5	1	15	15	0.933333	0.93	1.14613	1.15	14	14	0	0	1	0	0	0	0	coding
BET1	1	7	7	0.714286	0.71	0.69897	0.7	7	7	0	0	0	0	1	0	0	start_codon
BEX1	3	46	12	2.5463	0.92	2.63982	0.85	36	11	1	0	1	0	0	0	0	coding
BEX2	1	29	29	0.965517	0.97	1.14613	1.15	18	18	0	0	0	0	0	0	0	5'utr-intron
BEX4	2	15	7	1.75	0.88	1.62325	0.81	12	6	2	0	0	0	0	0	0	5'utr
BFAR	1	14	14	0.928571	0.93	1.11394	1.11	13	13	1	0	0	0	0	0	0	5'utr
BICD2	1	19	19	0.842105	0.84	0.90309	0.9	19	19	0	0	0	0	1	0	0	start_codon
BID	1	7	7	0.714286	0.71	0.69897	0.7	5	5	0	0	0	0	1	0	0	start_codon
BIRC2	2	39	19	1.95455	0.98	2.55267	1.28	27	13.5	2	0	0	0	0	0	0	5'utr
BIRC3	4	73	14	3.03968	0.75	3.1181	0.77	64	12	2	0	0	0	0	0	0	5'utr-intron
BIRC5	6	84	12	5.35251	0.9	5.53446	0.9	75	11.5	0	0	0	3	1	1	0	start_codon
BIVM	3	35	7	2.66667	0.86	2.55267	0.85	31	7	0	3	0	0	0	0	0	intron
BLM	1	22	22	1	1	1.34242	1.34	13	13	1	0	0	0	0	0	0	5'utr
BLMH	1	8	8	0.75	0.75	0.778151	0.78	7	7	0	0	0	0	1	0	0	start_codon
BLOC1S3	1	21	21	1	1	1.32222	1.32	8	8	0	0	1	0	0	0	0	coding
BLOC1S5	1	26	26	0.884615	0.88	1.0607	1.06	15	15	0	0	0	0	1	0	0	start_codon
BLVRA	1	7	7	0.857143	0.86	0.778151	0.78	7	7	0	0	1	0	0	0	0	coding
BLZF1	1	23	23	0.782609	0.78	1.25527	1.26	20	20	1	0	0	0	0	0	0	5'utr
BMI1	5	107	13	4.22222	0.86	4.52014	0.85	91	10	5	0	0	0	0	0	0	5'utr
BMP2K	1	14	14	0.928571	0.93	0.812913	0.81	11	11	1	0	0	0	0	0	0	5'utr
BMPR1A	1	10	10	0.8	0.8	0.90309	0.9	10	10	1	0	0	0	0	0	0	5'utr
BMPR2	1	7	7	0.857143	0.86	0.778151	0.78	5	5	1	0	0	0	0	0	0	5'utr
BNIP2	3	71	11	2.56401	0.84	3.56703	1	55	11	0	0	3	0	0	0	0	coding
BNIP3	1	14	14	0.857143	0.86	0.778151	0.78	13	13	1	0	0	0	0	0	0	5'utr
BOD1	2	14	7	2	1	1.6902	0.85	12	6	1	0	1	0	0	0	0	coding
BOLA1	1	12	12	0.916667	0.92	1.04139	1.04	9	9	0	1	0	0	0	0	0	intron
BOLA2	2	32	16	1.96	0.98	2.22531	1.11	12	6	1	0	1	0	0	0	0	coding
BOLA2B	3	52	16	2.39352	0.85	2.80889	0.88	30	7	1	0	2	0	0	0	0	coding
BOLA3	1	9	9	1	1	0.954243	0.95	4	4	1	0	0	0	0	0	0	5'utr
BORA	1	11	11	0.909091	0.91	1	1	11	11	0	0	1	0	0	0	0	coding
BPNT1	1	8	8	0.875	0.88	0.845098	0.85	8	8	1	0	0	0	0	0	0	5'utr
BPTF	2	25	12	1.88889	0.94	2.04922	1.02	12	6	1	0	1	0	0	0	0	5'utr
BRAP	1	10	10	0.7	0.7	0.845098	0.85	10	10	1	0	0	0	0	0	0	5'utr
BRAT1	1	8	8	1	1	0.90309	0.9	7	7	0	0	1	0	0	0	0	coding
BRCA1	1	14	14	0.857143	0.86	0.778151	0.78	13	13	1	0	0	0	0	0	0	5'utr
BRD1	2	23	11	1.73214	0.87	1.92428	0.96	20	10	0	0	1	1	0	0	0	3'utr
BRD2	12	303	12	10.295	0.86	11.1582	0.9	262	11.5	7	1	0	3	1	0	0	5'utr
BRD3	2	23	11	1.72308	0.86	1.98227	0.99	13	6.5	0	0	2	0	0	0	0	coding
BRD4	4	120	18	3.07401	0.79	3.89927	0.89	83	14	2	0	0	1	1	0	0	3'utr
BRD7	2	42	21	1.72794	0.86	2.3075	1.15	27	13.5	1	0	0	0	1	0	0	start_codon
BRF1	3	44	17	2.36261	0.85	2.7356	0.9	37	15	3	0	0	0	0	0	0	5'utr
BRI3BP	1	7	7	0.714286	0.71	0.69897	0.7	6	6	1	0	0	0	0	0	0	5'utr
BRIP1	1	13	13	0.846154	0.85	0.740363	0.74	13	13	1	0	0	0	0	0	0	5'utr
BRK1	1	15	15	0.866667	0.87	0.812913	0.81	13	13	0	0	0	1	0	0	0	3'utr
BRPF1	5	111	23	4.08959	0.81	4.60873	0.78	92	23	4	0	1	0	0	0	0	5'utr
BRWD1	1	15	15	0.6	0.6	0.954243	0.95	14	14	0	0	0	0	1	0	0	start_codon
BSG	2	43	21	1.74183	0.87	1.76343	0.88	39	19.5	0	0	0	1	1	0	0	start_codon
BTBD1	1	12	12	0.666667	0.67	0.60206	0.6	12	12	0	0	1	0	0	0	0	coding
BTBD2	2	43	21	1.83333	0.92	1.72016	0.86	32	16	0	0	0	1	1	0	0	3'utr
BTBD6	3	42	15	2.43068	0.81	3.14737	1.08	30	8	0	0	2	0	1	0	0	start_codon
BTBD7	1	29	29	0.724138	0.72	0.845098	0.85	28	28	0	0	0	0	1	0	0	start_codon
BTF3	3	148	32	2.64119	0.93	3.71146	0.92	111	25	1	0	0	0	0	0	0	5'utr
BTF3L4	2	16	8	1.74603	0.87	1.38021	0.69	16	8	1	0	0	0	0	0	0	5'utr
BTG1	3	172	52	2.39321	0.77	2.89556	0.79	135	33	3	0	0	0	0	0	0	5'utr
BTG3	3	79	36	2.61111	0.83	2.6902	0.88	56	27	3	0	0	0	0	0	0	5'utr
BTN2A1	2	30	15	1.44444	0.72	1.99123	1	25	12.5	2	0	0	0	0	0	0	5'utr
BTN3A1	1	10	10	0.6	0.6	0.778151	0.78	10	10	1	0	0	0	0	0	0	5'utr
BUB1B	2	23	11	1.80833	0.9	1.99123	1	22	11	2	0	0	0	0	0	0	5'utr
BUB3	1	12	12	0.916667	0.92	0.740363	0.74	10	10	0	0	1	0	0	0	0	coding
BUD31	3	31	7	2.59664	0.88	2.41913	0.85	30	7	2	0	0	1	0	0	0	5'utr
BX322557.10	6	98	17	5.15411	0.9	5.98467	1.07	83	13.5	0	0	0	0	0	0	0	lincRNA_exon
BZW1	4	41	9	3.62381	0.88	3.80058	0.95	34	7.5	2	0	2	0	0	0	0	5'utr
BZW2	1	13	13	0.846154	0.85	0.740363	0.74	9	9	1	0	0	0	0	0	0	5'utr
C10orf2	3	104	29	2.40578	0.78	2.7351	0.85	68	18	0	0	0	0	0	0	0	processed_transcript
C10orf35	1	13	13	0.846154	0.85	0.740363	0.74	8	8	1	0	0	0	0	0	0	5'utr
C10orf54	1	7	7	0.857143	0.86	0.778151	0.78	5	5	1	0	0	0	0	0	0	5'utr
C10orf76	1	17	17	0.882353	0.88	1.17609	1.18	15	15	1	0	0	0	0	0	0	5'utr
C11orf31	4	301	33	3.40483	0.89	4.55024	1.12	110	20	1	0	1	0	1	0	0	5'utr
C11orf57	3	29	9	2.88889	1	2.5977	0.95	26	8	3	0	0	0	0	0	0	5'utr
C11orf58	1	75	75	0.533333	0.53	1.12494	1.12	39	39	0	0	0	0	1	0	0	start_codon
C11orf68	1	7	7	0.857143	0.86	0.778151	0.78	7	7	0	0	1	0	0	0	0	coding
C11orf84	1	11	11	0.818182	0.82	0.653213	0.65	8	8	1	0	0	0	0	0	0	5'utr
C11orf95	4	46	9	3	0.75	2.82737	0.72	38	8.5	0	0	0	4	0	0	0	3'utr
C12orf49	2	112	56	1.63871	0.82	1.96588	0.98	64	32	2	0	0	0	0	0	0	5'utr
C12orf57	3	43	13	2.70979	0.86	2.92221	0.9	37	8	0	0	2	0	0	0	0	retained_intron
C12orf65	1	14	14	0.857143	0.86	0.778151	0.78	9	9	0	0	1	0	0	0	0	coding
C12orf66	1	9	9	1	1	0.954243	0.95	5	5	1	0	0	0	0	0	0	5'utr
C12orf75	1	11	11	1	1	1.04139	1.04	9	9	0	0	0	0	1	0	0	start_codon
C14orf1	1	19	19	0.736842	0.74	1.14613	1.15	15	15	1	0	0	0	0	0	0	5'utr
C14orf142	1	8	8	1	1	0.845098	0.85	6	6	0	0	1	0	0	0	0	coding
C14orf166	2	18	9	1.9	0.95	1.85733	0.93	18	9	1	0	1	0	0	0	0	5'utr
C14orf169	1	9	9	1	1	0.954243	0.95	8	8	0	0	1	0	0	0	0	coding
C14orf2	3	30	11	2.65909	0.91	2.81954	1	29	10	1	0	0	2	0	0	0	3'utr
C14orf79	1	10	10	1	1	1	1	9	9	1	0	0	0	0	0	0	5'utr
C14orf80	1	7	7	0.857143	0.86	0.778151	0.78	6	6	0	0	0	1	0	0	0	3'utr
C15orf39	1	10	10	1	1	1	1	6	6	1	0	0	0	0	0	0	5'utr
C15orf61	1	8	8	1	1	0.90309	0.9	6	6	0	0	1	0	0	0	0	coding
C16orf59	1	13	13	1	1	1.11394	1.11	12	12	0	0	0	0	0	0	0	lincRNA_exon-lincRNA_intron
C16orf72	2	364	182	1.68265	0.84	2.27355	1.14	237	118.5	2	0	0	0	0	0	0	5'utr
C16orf91	3	41	10	2.85238	0.95	3.25527	1	25	7	0	0	2	0	0	0	0	coding
C16orf95	1	10	10	0.9	0.9	0.954243	0.95	9	9	1	0	0	0	0	0	0	5'utr
C17orf49	2	30	15	1.82955	0.91	2.16732	1.08	18	9	1	0	0	1	0	0	0	5'utr
C17orf51	1	29	29	0.827586	0.83	0.90309	0.9	22	22	1	0	0	0	0	0	0	5'utr
C17orf62	8	116	14	6.40754	0.83	7.07828	0.9	103	13	2	0	1	3	1	0	0	3'utr
C17orf85	1	9	9	0.888889	0.89	0.90309	0.9	8	8	0	0	1	0	0	0	0	coding
C17orf89	1	8	8	1	1	0.90309	0.9	4	4	0	0	1	0	0	0	0	coding
C17orf96	8	178	15	6.89034	0.82	7.11336	0.91	148	11.5	3	0	3	1	1	0	0	3'utr
C17orf97	1	16	16	0.75	0.75	0.60206	0.6	13	13	0	0	1	0	0	0	0	coding
C18orf25	2	102	51	1.68104	0.84	3.04532	1.52	76	38	2	0	0	0	0	0	0	5'utr
C18orf32	2	32	16	1.9	0.95	2.03342	1.02	19	9.5	1	0	0	0	0	0	0	5'utr
C18orf54	2	36	18	1.5375	0.77	2.27184	1.14	35	17.5	0	2	0	0	0	0	0	intron
C19orf12	1	10	10	0.8	0.8	0.60206	0.6	10	10	1	0	0	0	0	0	0	5'utr
C19orf24	4	93	14	3.5704	0.87	4.6902	1.07	60	11.5	0	0	2	2	0	0	0	coding
C19orf25	1	9	9	0.888889	0.89	0.90309	0.9	9	9	0	0	0	1	0	0	0	3'utr
C19orf43	2	194	97	1.76623	0.88	2.05436	1.03	125	62.5	0	0	1	0	1	0	0	coding
C19orf47	1	7	7	1	1	0.845098	0.85	7	7	0	0	0	1	0	0	0	3'utr
C19orf48	3	34	9	2.66667	0.89	2.89432	0.9	33	9	1	0	2	0	0	0	0	coding
C19orf53	1	18	18	0.944444	0.94	1.23045	1.23	14	14	0	0	1	0	0	0	0	coding
C19orf54	3	45	14	2.62943	0.92	2.73719	0.85	40	12	0	0	0	0	0	0	0	nonsense_mediated_decay
C19orf60	1	18	18	1	1	1.25527	1.26	7	7	0	0	0	0	0	0	0	coding-intron
C19orf81	1	27	27	0.888889	0.89	0.90309	0.9	19	19	0	0	1	0	0	0	0	coding
C1GALT1	2	22	11	1.54545	0.77	1.25527	0.63	19	9.5	2	0	0	0	0	0	0	5'utr
C1QBP	2	132	66	1.61565	0.81	1.7839	0.89	103	51.5	0	0	1	0	1	0	0	coding
C1orf109	2	23	11	1.78571	0.89	1.99564	1	22	11	2	0	0	0	0	0	0	5'utr
C1orf122	1	15	15	0.8	0.8	0.778151	0.78	12	12	1	0	0	0	0	0	0	5'utr
C1orf132	1	10	10	0.9	0.9	0.954243	0.95	9	9	0	0	0	0	0	0	0	lincRNA_exon
C1orf159	2	16	8	1.88889	0.94	1.74819	0.87	16	8	0	1	0	1	0	0	0	3'utr
C1orf174	1	17	17	0.764706	0.76	0.812913	0.81	12	12	1	0	0	0	0	0	0	5'utr
C1orf198	1	13	13	0.923077	0.92	1.07918	1.08	9	9	0	0	1	0	0	0	0	coding
C1orf43	4	136	13	3.7598	0.96	4.39502	1.11	76	12	2	0	0	1	0	0	0	3'utr
C1orf61	1	19	19	0.263158	0.26	0.69897	0.7	5	5	0	1	0	0	0	0	0	intron
C1orf86	10	219	12	8.83935	0.88	9.38925	0.9	169	10.5	0	3	3	3	0	0	0	3'utr
C20orf24	1	84	84	0.833333	0.83	1.06695	1.07	64	64	1	0	0	0	0	0	0	5'utr
C20orf27	2	17	8	1.77778	0.89	1.74819	0.87	14	7	1	0	0	0	1	0	0	start_codon
C21orf58	3	29	10	2.70909	0.91	2.50515	0.9	21	7	3	0	0	0	0	0	0	5'utr
C21orf59	3	67	14	2.76948	0.93	2.85824	0.95	49	10	3	0	0	0	0	0	0	5'utr
C21orf67	1	11	11	0.727273	0.73	0.60206	0.6	10	10	0	0	0	0	0	0	0	lincRNA_exon
C22orf39	1	8	8	1	1	0.90309	0.9	4	4	0	0	1	0	0	0	0	coding
C22orf46	1	7	7	1	1	0.845098	0.85	7	7	0	0	1	0	0	0	0	coding
C2CD2L	4	50	12	3.57639	0.91	3.76042	0.9	42	11	2	0	0	1	1	0	0	5'utr
C2orf68	1	11	11	0.909091	0.91	0.69897	0.7	11	11	0	0	0	0	0	0	0	nonsense_mediated_decay
C2orf88	2	54	27	1.47416	0.74	1.63849	0.82	47	23.5	0	0	0	0	0	0	0	processed_transcript
C3orf17	1	19	19	0.789474	0.79	0.875061	0.88	16	16	0	0	0	0	1	0	0	start_codon
C3orf38	1	7	7	1	1	0.845098	0.85	5	5	1	0	0	0	0	0	0	5'utr
C3orf58	2	19	9	1.83333	0.92	1.77815	0.89	13	6.5	1	0	1	0	0	0	0	5'utr
C4orf29	1	23	23	0.782609	0.78	0.778151	0.78	19	19	1	0	0	0	0	0	0	5'utr
C4orf3	1	26	26	0.692308	0.69	0.954243	0.95	25	25	0	0	0	0	1	0	0	start_codon
C5orf24	2	69	34	1.40513	0.7	2.43457	1.22	43	21.5	2	0	0	0	0	0	0	5'utr
C6orf106	1	13	13	0.923077	0.92	0.778151	0.78	12	12	0	0	0	0	1	0	0	start_codon
C6orf120	1	11	11	1	1	1.04139	1.04	8	8	1	0	0	0	0	0	0	5'utr
C6orf47	2	24	12	1.75	0.88	1.99123	1	23	11.5	2	0	0	0	0	0	0	5'utr
C6orf62	13	552	36	10.4718	0.81	13.6475	1.06	473	30	11	0	0	0	1	0	0	5'utr
C7orf25	1	10	10	1	1	1	1	8	8	0	0	1	0	0	0	0	coding
C7orf26	5	166	10	4.19955	0.86	5.08676	0.9	129	7	3	0	2	0	0	0	0	5'utr
C7orf43	1	14	14	0.928571	0.93	0.812913	0.81	9	9	1	0	0	0	0	0	0	5'utr
C7orf55-LUC7L2	5	308	12	4.27146	0.86	5.07284	1	214	8	3	1	0	1	0	0	0	5'utr
C8orf33	2	23	11	1.60833	0.8	1.88649	0.94	22	11	0	0	1	0	0	0	0	lincRNA_exon-lincRNA_intron
C8orf59	2	32	16	1.63492	0.82	2.22531	1.11	27	13.5	2	0	0	0	0	0	0	5'utr
C9orf114	1	11	11	0.818182	0.82	0.653213	0.65	5	5	0	0	0	1	0	0	0	3'utr
C9orf142	3	26	8	2.62338	0.91	2.30103	0.7	25	8	0	1	1	0	1	0	0	start_codon
C9orf16	3	104	32	2.65625	0.88	3.45255	0.85	67	26	1	0	2	0	0	0	0	5'utr
C9orf3	1	65	65	0.8	0.8	0.812913	0.81	9	9	0	1	0	0	0	0	0	intron
C9orf40	3	93	34	2.4922	0.82	3.233	1.1	77	25	2	0	1	0	0	0	0	coding
C9orf64	1	7	7	0.857143	0.86	0.778151	0.78	7	7	1	0	0	0	0	0	0	5'utr
C9orf69	6	49	8	5.0377	0.88	4.69366	0.81	48	8	0	0	1	5	0	0	0	3'utr
C9orf78	2	22	11	1.65714	0.83	1.85733	0.93	19	9.5	0	0	2	0	0	0	0	coding
C9orf89	1	10	10	0.9	0.9	0.954243	0.95	10	10	1	0	0	0	0	0	0	5'utr
C9orf91	1	13	13	0.923077	0.92	1.07918	1.08	12	12	1	0	0	0	0	0	0	5'utr
CAB39	4	110	19	3.6132	0.9	4.24347	1.05	84	15.5	2	2	0	0	0	0	0	5'utr
CACNA2D3	1	22	22	0.409091	0.41	0.954243	0.95	17	17	0	1	0	0	0	0	0	intron
CACNB3	1	18	18	0.888889	0.89	0.90309	0.9	16	16	1	0	0	0	0	0	0	5'utr
CACTIN	1	11	11	1	1	1.04139	1.04	9	9	0	0	1	0	0	0	0	coding
CACUL1	2	45	22	1.66667	0.83	2.17609	1.09	33	16.5	1	0	1	0	0	0	0	coding
CACYBP	2	132	66	1.67544	0.84	2.25527	1.13	110	55	2	0	0	0	0	0	0	5'utr
CALM1	2	43	21	1.72443	0.86	1.51355	0.76	28	14	2	0	0	0	0	0	0	5'utr
CALM2	2	48	24	1.89474	0.95	2.53148	1.27	42	21	0	0	0	1	1	0	0	3'utr
CALM3	2	111	55	1.81188	0.91	2.01072	1.01	83	41.5	1	0	0	1	0	0	0	5'utr
CALR	3	157	43	2.41463	0.86	3.13988	1.18	69	27	0	0	1	1	1	0	0	start_codon
CALU	1	11	11	0.909091	0.91	1	1	9	9	1	0	0	0	0	0	0	5'utr
CAMK2D	4	41	10	3.41818	0.91	3.39041	0.81	36	9.5	4	0	0	0	0	0	0	5'utr
CAMK2N1	2	35	17	1.92308	0.96	1.85733	0.93	29	14.5	2	0	0	0	0	0	0	5'utr
CAMK4	1	12	12	0.916667	0.92	0.740363	0.74	10	10	0	0	1	0	0	0	0	coding
CAMLG	2	25	12	1.78571	0.89	1.78176	0.89	23	11.5	0	0	1	0	1	0	0	start_codon
CAMSAP1	2	25	12	1.67949	0.84	1.74036	0.87	16	8	1	0	1	0	0	0	0	coding
CAMTA1	1	37	37	0.864865	0.86	1.20412	1.2	27	27	0	0	0	0	1	0	0	start_codon
CAND1	2	32	16	1.8125	0.91	1.84094	0.92	29	14.5	2	0	0	0	0	0	0	5'utr
CANT1	3	34	12	2.85	0.93	3.03262	1.04	29	10	1	0	1	1	0	0	0	3'utr
CANX	4	102	26	3.44004	0.85	4.00459	0.96	65	11.5	2	0	0	0	1	0	0	5'utr
CAPG	1	7	7	1	1	0.845098	0.85	6	6	1	0	0	0	0	0	0	5'utr
CAPN15	54	754	12	44.6605	0.84	49.1399	0.87	630	10	2	34	13	3	0	0	0	processed_transcript
CAPN7	1	10	10	1	1	1	1	8	8	1	0	0	0	0	0	0	5'utr
CAPNS1	1	10	10	1	1	1	1	6	6	1	0	0	0	0	0	0	5'utr
CAPRIN1	2	20	10	1.8	0.9	1.90309	0.95	19	9.5	0	0	1	0	0	0	0	5'utr-intron
CAPZA1	1	9	9	1	1	0.954243	0.95	7	7	1	0	0	0	0	0	0	5'utr
CAPZB	1	15	15	0.733333	0.73	0.740363	0.74	14	14	0	0	0	0	0	0	0	processed_transcript
CARD11	2	30	15	1.90909	0.95	1.90309	0.95	17	8.5	2	0	0	0	0	0	0	5'utr
CARD8	2	19	9	1.85714	0.93	1.85733	0.93	16	8	0	1	1	0	0	0	0	coding
CARHSP1	1	31	31	0.709677	0.71	1.04139	1.04	20	20	1	0	0	0	0	0	0	5'utr
CARM1	1	13	13	0.846154	0.85	1.04139	1.04	13	13	1	0	0	0	0	0	0	5'utr
CARS2	1	9	9	1	1	0.954243	0.95	8	8	0	0	1	0	0	0	0	coding
CASC15	5	133	12	4.17197	0.85	5.06416	0.95	106	11	0	0	0	0	0	0	0	lincRNA_intron
CASC4	2	33	16	1.5989	0.8	2.0607	1.03	23	11.5	2	0	0	0	0	0	0	5'utr
CASC7	1	7	7	0.714286	0.71	0.69897	0.7	5	5	0	0	0	0	0	0	0	lincRNA_exon
CASD1	1	7	7	1	1	0.845098	0.85	6	6	1	0	0	0	0	0	0	5'utr
CASK	2	21	10	1.64423	0.82	1.54407	0.77	18	9	2	0	0	0	0	0	0	5'utr
CASP3	3	37	11	2.44659	0.91	2.95424	1	31	10	3	0	0	0	0	0	0	5'utr
CASP8AP2	2	41	20	1.79832	0.9	2.2833	1.14	31	15.5	2	0	0	0	0	0	0	5'utr
CASZ1	1	8	8	0.875	0.88	0.845098	0.85	6	6	0	0	0	1	0	0	0	3'utr
CBFA2T3	3	62	15	2.43784	0.8	2.57054	0.78	30	10	1	2	0	0	0	0	0	intron
CBFB	3	293	47	2.61794	0.88	3.75962	1.12	146	33	1	0	1	0	1	0	0	5'utr
CBL	4	62	15	3.12872	0.75	3.62572	0.91	49	12	3	0	1	0	0	0	0	5'utr
CBWD1	2	22	11	1.9	0.95	1.73239	0.87	14	7	1	0	0	0	1	0	0	start_codon
CBWD2	2	18	9	1.88889	0.94	1.5563	0.78	17	8.5	1	0	1	0	0	0	0	5'utr
CBWD3	2	26	13	1.59394	0.8	1.41497	0.71	21	10.5	1	0	1	0	0	0	0	5'utr
CBWD5	1	85	85	0.952941	0.95	1.60746	1.61	27	27	0	0	0	0	1	0	0	start_codon
CBWD7	2	28	14	1.52083	0.76	2.02119	1.01	18	9	1	0	1	0	0	0	0	coding
CBX1	5	70	11	4.57048	0.88	5.2923	1.04	52	9	4	0	1	0	0	0	0	coding
CBX2	2	22	11	1.93333	0.97	1.99123	1	22	11	1	0	0	1	0	0	0	5'utr
CBX3	9	270	15	7.80636	0.82	8.77552	0.9	210	10	2	7	0	0	0	0	0	5'utr
CBX4	2	110	55	1.76531	0.88	1.8403	0.92	91	45.5	0	0	0	1	1	0	0	3'utr
CBX5	3	73	10	2.50714	0.89	2.87506	0.95	65	7	0	0	0	2	0	0	0	3'utr
CBX6	15	277	14	12.2824	0.83	15.7094	1.04	230	13	0	0	3	11	1	0	0	3'utr
CCAR2	4	41	8	3.77778	1	3.32028	0.87	33	6.5	1	0	2	1	0	0	0	5'utr
CCBL2	1	22	22	0.863636	0.86	1.27875	1.28	15	15	1	0	0	0	0	0	0	5'utr
CCDC101	1	9	9	1	1	0.954243	0.95	6	6	1	0	0	0	0	0	0	5'utr
CCDC107	2	16	8	1.25	0.63	1.38021	0.69	13	6.5	0	0	1	0	1	0	0	start_codon
CCDC117	1	7	7	0.857143	0.86	0.778151	0.78	6	6	0	0	0	0	0	1	0	stop_codon
CCDC12	1	11	11	0.909091	0.91	0.69897	0.7	8	8	0	0	1	0	0	0	0	coding
CCDC124	3	26	8	2.55	0.8	2.2833	0.78	24	8	1	0	1	0	1	0	0	5'utr
CCDC126	1	16	16	1	1	1.20412	1.2	11	11	1	0	0	0	0	0	0	5'utr
CCDC18	1	9	9	0.888889	0.89	0.60206	0.6	7	7	1	0	0	0	0	0	0	5'utr
CCDC43	1	13	13	0.923077	0.92	1.07918	1.08	12	12	0	0	1	0	0	0	0	coding
CCDC47	1	9	9	1	1	0.954243	0.95	8	8	1	0	0	0	0	0	0	5'utr
CCDC59	1	7	7	0.857143	0.86	0.778151	0.78	7	7	0	0	1	0	0	0	0	coding
CCDC71L	4	58	13	3.51667	0.93	4.06833	1.09	45	11	1	0	3	0	0	0	0	coding
CCDC85B	2	19	9	1.88889	0.94	1.90309	0.95	16	8	0	0	2	0	0	0	0	coding
CCDC86	1	15	15	0.933333	0.93	0.845098	0.85	13	13	0	0	1	0	0	0	0	coding
CCDC88A	1	11	11	0.909091	0.91	1	1	10	10	1	0	0	0	0	0	0	5'utr
CCDC88C	1	7	7	0.857143	0.86	0.778151	0.78	7	7	0	0	0	1	0	0	0	3'utr
CCDC90B	1	28	28	1	1	1.44716	1.45	23	23	0	0	0	0	0	0	0	coding-intron
CCDC92	1	7	7	1	1	0.845098	0.85	6	6	1	0	0	0	0	0	0	5'utr
CCDC93	1	7	7	0.714286	0.71	0.69897	0.7	7	7	1	0	0	0	0	0	0	5'utr
CCDC97	1	14	14	0.857143	0.86	0.778151	0.78	13	13	1	0	0	0	0	0	0	5'utr
CCM2	1	21	21	0.809524	0.81	0.929419	0.93	16	16	0	0	0	1	0	0	0	3'utr
CCNA2	5	288	15	4.55026	0.9	5.13949	1	173	8	3	0	1	0	1	0	0	coding
CCNB1	1	115	115	0.904348	0.9	1.41497	1.41	96	96	0	0	0	0	1	0	0	start_codon
CCNB2	3	36	8	2.80952	0.95	2.68124	0.9	31	7	2	0	0	0	1	0	0	5'utr
CCNC	1	18	18	0.833333	0.83	1.17609	1.18	17	17	1	0	0	0	0	0	0	5'utr
CCND3	3	66	8	2.58088	0.88	2.29226	0.85	50	7	1	0	0	1	1	0	0	3'utr
CCNF	1	7	7	0.857143	0.86	0.778151	0.78	6	6	0	0	0	1	0	0	0	3'utr
CCNG1	1	15	15	1	1	1.17609	1.18	13	13	1	0	0	0	0	0	0	5'utr
CCNG2	3	105	32	2.58651	0.87	3.35218	1	80	18	2	0	0	0	0	0	0	5'utr
CCNI	5	170	33	4.23495	0.85	5.26085	1.04	124	21	4	0	1	0	0	0	0	coding
CCNJ	1	11	11	0.818182	0.82	0.653213	0.65	11	11	1	0	0	0	0	0	0	5'utr
CCNJL	1	10	10	0.8	0.8	0.60206	0.6	10	10	1	0	0	0	0	0	0	5'utr
CCNL1	1	7	7	1	1	0.845098	0.85	7	7	0	1	0	0	0	0	0	intron
CCNY	2	33	16	1.7381	0.87	2.27875	1.14	26	13	1	1	0	0	0	0	0	intron
CCNYL1	1	27	27	0.925926	0.93	1.39794	1.4	9	9	1	0	0	0	0	0	0	5'utr
CCRN4L	1	8	8	0.875	0.88	0.845098	0.85	8	8	0	0	1	0	0	0	0	coding
CCSER2	1	59	59	0.915254	0.92	1.25527	1.26	46	46	1	0	0	0	0	0	0	5'utr
CCT3	1	12	12	1	1	1.07918	1.08	12	12	0	0	0	0	1	0	0	start_codon
CCT4	3	46	13	2.75524	0.91	2.78176	1	34	10	2	0	1	0	0	0	0	coding
CCT5	1	13	13	0.923077	0.92	1.07918	1.08	11	11	0	0	0	0	1	0	0	start_codon
CCT6A	1	14	14	0.928571	0.93	0.812913	0.81	12	12	1	0	0	0	0	0	0	5'utr
CCT7	1	10	10	0.7	0.7	0.845098	0.85	9	9	1	0	0	0	0	0	0	5'utr
CCZ1	2	42	21	1.78519	0.89	2.20683	1.1	14	7	0	0	1	0	1	0	0	start_codon
CCZ1B	1	8	8	0.875	0.88	0.845098	0.85	6	6	0	0	1	0	0	0	0	coding
CD164	2	57	28	1.53671	0.77	1.73239	0.87	56	28	0	0	1	0	1	0	0	coding
CD1E	1	13	13	0.923077	0.92	1.07918	1.08	11	11	1	0	0	0	0	0	0	5'utr
CD247	3	42	13	2.15799	0.69	2.37337	0.85	33	11	1	0	0	1	1	0	0	3'utr
CD28	6	69	10	4.3431	0.74	4.56234	0.72	66	10.5	1	0	3	1	1	0	0	5'utr
CD2AP	3	48	20	2.56429	0.86	2.78675	0.78	35	11	3	0	0	0	0	0	0	5'utr
CD2BP2	5	80	9	4.35317	0.89	4.98227	0.9	65	9	1	0	2	2	0	0	0	3'utr
CD3D	6	338	9	4.94174	0.81	5.64007	0.9	216	9.5	0	0	3	0	1	1	0	stop_codon
CD3E	3	30	9	2.46032	0.86	2.68124	0.9	29	8	0	0	1	1	1	0	0	start_codon
CD3G	1	16	16	0.75	0.75	1.07918	1.08	16	16	0	0	0	0	1	0	0	start_codon
CD46	2	18	9	1.875	0.94	1.8451	0.92	17	8.5	1	0	0	0	1	0	0	5'utr
CD47	2	63	31	1.71818	0.86	2.86273	1.43	55	27.5	1	0	0	0	1	0	0	start_codon
CD48	1	7	7	0.571429	0.57	0.60206	0.6	7	7	0	0	0	0	1	0	0	start_codon
CD53	3	53	8	2.41353	0.84	2.31133	0.81	49	7	1	0	0	1	1	0	0	5'utr
CD59	2	18	9	1.9	0.95	1.85733	0.93	15	7.5	1	0	0	0	1	0	0	start_codon
CD6	1	51	51	0.607843	0.61	1.49136	1.49	20	20	1	0	0	0	0	0	0	5'utr
CD63	1	7	7	1	1	0.845098	0.85	5	5	0	0	0	0	1	0	0	start_codon
CD69	3	71	13	2.56376	0.85	3.14406	1.04	68	12	0	0	0	2	1	0	0	3'utr
CD7	2	23	11	1.5625	0.78	1.79934	0.9	14	7	1	0	0	0	0	0	0	coding-intron
CD81	1	9	9	0.888889	0.89	0.90309	0.9	9	9	0	0	0	1	0	0	0	3'utr
CD82	11	458	18	9.20087	0.83	11.9198	1.11	347	17	2	0	1	6	1	0	0	5'utr
CD83	1	16	16	0.8125	0.81	1.11394	1.11	16	16	0	0	0	0	1	0	0	start_codon
CD96	1	7	7	0.857143	0.86	0.778151	0.78	7	7	1	0	0	0	0	0	0	5'utr
CD99	2	60	30	1.67225	0.84	2.28631	1.14	45	22.5	1	0	0	0	1	0	0	5'utr
CDC20	2	34	17	1.77866	0.89	2.30103	1.15	27	13.5	0	0	0	0	1	0	0	5'utr-intron
CDC25A	4	184	49	3.02078	0.76	3.41179	0.86	136	36.5	3	0	0	0	1	0	0	start_codon
CDC25B	2	21	10	1.71818	0.86	1.30643	0.65	19	9.5	1	0	0	1	0	0	0	5'utr
CDC26	2	25	12	1.88235	0.94	1.77815	0.89	24	12	2	0	0	0	0	0	0	5'utr
CDC34	5	76	10	4.66308	1	4.80509	1	51	9	2	0	1	1	1	0	0	5'utr
CDC37L1	1	7	7	0.857143	0.86	0.778151	0.78	6	6	1	0	0	0	0	0	0	5'utr
CDC42SE1	4	80	14	3.57008	0.88	3.54745	0.93	63	11	3	0	0	1	0	0	0	3'utr
CDC42SE2	1	34	34	0.823529	0.82	0.970037	0.97	25	25	1	0	0	0	0	0	0	5'utr
CDC5L	1	10	10	0.9	0.9	0.653213	0.65	10	10	0	0	0	0	1	0	0	start_codon
CDC6	2	20	10	1.81818	0.91	1.60746	0.8	19	9.5	2	0	0	0	0	0	0	5'utr
CDC7	1	11	11	0.909091	0.91	1	1	6	6	1	0	0	0	0	0	0	5'utr
CDCA2	4	126	30	3.26126	0.82	4.47481	1.12	95	26	4	0	0	0	0	0	0	5'utr
CDCA3	1	9	9	0.777778	0.78	0.845098	0.85	9	9	1	0	0	0	0	0	0	5'utr
CDCA4	2	41	20	1.90909	0.95	2.38021	1.19	33	16.5	0	0	1	0	0	0	0	coding
CDCA5	16	264	11	13.7398	0.87	15.6918	0.96	212	11.5	1	1	5	8	0	0	0	3'utr
CDCA7	2	21	10	2	1	2.03342	1.02	17	8.5	1	0	0	0	1	0	0	5'utr
CDCA7L	1	9	9	1	1	0.954243	0.95	6	6	1	0	0	0	0	0	0	5'utr
CDCA8	1	90	90	0.933333	0.93	1.44716	1.45	38	38	0	0	0	0	1	0	0	start_codon
CDH18	1	24	24	0.958333	0.96	1.36173	1.36	8	8	0	1	0	0	0	0	0	intron
CDIPT	6	179	25	5.34348	0.88	7.22252	1.2	124	15.5	2	0	0	3	0	0	0	3'utr
CDK1	2	73	36	1.83333	0.92	1.88649	0.94	33	16.5	1	0	0	0	0	0	0	5'utr-intron
CDK11B	1	15	15	0.933333	0.93	1.14613	1.15	14	14	0	1	0	0	0	0	0	intron
CDK13	10	263	21	8.13618	0.86	9.14892	0.94	189	16.5	5	0	4	0	1	0	0	5'utr
CDK16	1	11	11	0.909091	0.91	1	1	10	10	1	0	0	0	0	0	0	5'utr
CDK17	4	152	26	3.20546	0.87	4.05956	0.92	104	17.5	4	0	0	0	0	0	0	5'utr
CDK19	1	8	8	1	1	0.90309	0.9	7	7	0	1	0	0	0	0	0	intron
CDK2	2	98	49	1.82418	0.91	2.24304	1.12	88	44	1	0	0	1	0	0	0	5'utr
CDK2AP1	3	123	41	2.30151	0.8	3.96106	1.18	77	30	3	0	0	0	0	0	0	5'utr
CDK2AP2	5	200	21	4.38068	0.86	5.54514	1	135	9	3	0	1	0	0	0	0	coding
CDK2AP2P2	1	7	7	0.714286	0.71	0.69897	0.7	5	5	0	0	0	0	0	0	0	processed_pseudogene
CDK4	2	117	58	1.58333	0.79	2.29667	1.15	74	37	1	0	1	0	0	0	0	coding
CDK6	29	1417	16	25.279	0.88	30.3941	0.95	785	14	5	2	2	18	1	0	0	3'utr
CDK7	1	26	26	0.884615	0.88	1.36173	1.36	21	21	0	0	0	0	1	0	0	start_codon
CDK8	5	116	11	4.15784	0.85	5.07482	0.95	88	10	5	0	0	0	0	0	0	5'utr
CDK9	3	21	7	2.85714	1	2.46835	0.85	19	6	1	0	0	2	0	0	0	5'utr
CDKN1A	1	7	7	1	1	0.845098	0.85	6	6	1	0	0	0	0	0	0	5'utr
CDKN1B	7	428	12	5.11667	0.69	6.48251	0.7	278	10	4	0	2	1	0	0	0	5'utr
CDKN2AIP	3	25	8	3	1	2.74819	0.9	19	6	2	0	0	0	1	0	0	5'utr
CDKN2AIPNL	1	41	41	0.902439	0.9	1.5682	1.57	28	28	0	0	0	0	1	0	0	start_codon
CDKN2C	8	487	22	6.79422	0.87	8.22873	1.07	345	16.5	7	0	0	0	0	0	0	5'utr
CDKN2D	3	50	11	2.53247	0.82	2.69461	1	32	9	2	0	1	0	0	0	0	coding
CDON	1	8	8	1	1	0.90309	0.9	7	7	0	1	0	0	0	0	0	intron
CDPF1	1	10	10	0.7	0.7	0.845098	0.85	10	10	0	0	0	0	0	0	0	processed_transcript
CDR2	4	122	28	3.43209	0.86	4.30809	0.97	81	19	4	0	0	0	0	0	0	5'utr
CDT1	3	39	16	2.41964	0.86	2.35218	0.78	37	15	0	0	0	2	1	0	0	start_codon
CDV3	4	158	41	2.90609	0.82	4.45157	1.18	116	27	3	0	1	0	0	0	0	5'utr
CEBPB	11	177	12	9.35357	0.92	10.5819	0.9	156	10	2	0	7	1	0	1	0	5'utr
CEBPG	2	30	15	1.65079	0.83	2.10721	1.05	23	11.5	1	0	0	0	0	1	0	5'utr
CECR5	3	97	16	2.625	0.88	2.93852	0.9	69	11	0	1	0	1	1	0	0	3'utr
CELF1	2	31	15	1.68182	0.84	1.8293	0.91	26	13	1	0	0	1	0	0	0	3'utr
CELF2	1	8	8	0.875	0.88	0.845098	0.85	8	8	1	0	0	0	0	0	0	5'utr
CENPA	4	169	48	3.4136	0.88	4.63843	1.19	125	35.5	2	0	0	0	1	1	0	5'utr
CENPB	19	697	23	15.3753	0.85	19.044	0.95	476	18	2	0	13	4	0	0	0	3'utr
CENPBD1P1	2	43	21	1.85714	0.93	2.33445	1.17	32	16	0	0	0	0	0	0	0	processed_transcript
CENPF	2	31	15	1.90909	0.95	1.95424	0.98	20	10	2	0	0	0	0	0	0	5'utr
CENPL	1	24	24	0.833333	0.83	1.30103	1.3	18	18	1	0	0	0	0	0	0	5'utr
CENPM	1	11	11	0.727273	0.73	0.90309	0.9	10	10	0	1	0	0	0	0	0	intron
CENPO	1	23	23	0.826087	0.83	1.27875	1.28	19	19	0	0	1	0	0	0	0	coding
CENPV	1	22	22	0.954545	0.95	1.32222	1.32	6	6	0	0	1	0	0	0	0	coding
CENPW	1	60	60	0.8	0.8	1.38021	1.38	52	52	0	0	0	0	1	0	0	start_codon
CEP112	1	11	11	0.909091	0.91	0.69897	0.7	10	10	0	1	0	0	0	0	0	intron
CEP135	2	16	8	1.88889	0.94	1.44716	0.72	14	7	2	0	0	0	0	0	0	5'utr
CEP164	1	7	7	0.857143	0.86	0.778151	0.78	6	6	0	1	0	0	0	0	0	intron
CEP19	1	18	18	0.833333	0.83	0.69897	0.7	16	16	1	0	0	0	0	0	0	5'utr
CEP350	3	26	9	2.40317	0.8	1.90309	0.6	24	8	3	0	0	0	0	0	0	5'utr
CEP44	2	19	9	1.69318	0.85	1.79934	0.9	17	8.5	1	0	0	0	0	0	0	5'utr-intron
CEP55	4	59	12	3.64909	0.9	3.78835	0.98	46	9.5	3	0	1	0	0	0	0	5'utr
CEP57	1	8	8	1	1	0.90309	0.9	6	6	1	0	0	0	0	0	0	5'utr
CEP72	5	70	10	4.55197	1	4.52197	0.95	62	9	0	3	1	0	1	0	0	start_codon
CEP76	1	13	13	0.846154	0.85	0.740363	0.74	10	10	1	0	0	0	0	0	0	5'utr
CEP83	1	10	10	0.9	0.9	0.954243	0.95	9	9	1	0	0	0	0	0	0	5'utr
CERS2	2	30	15	1.73333	0.87	1.92686	0.96	26	13	1	1	0	0	0	0	0	intron
CERS4	1	7	7	1	1	0.845098	0.85	6	6	1	0	0	0	0	0	0	5'utr
CERS5	1	11	11	0.909091	0.91	0.69897	0.7	10	10	1	0	0	0	0	0	0	5'utr
CERS6	1	33	33	0.818182	0.82	1.13033	1.13	26	26	1	0	0	0	0	0	0	5'utr
CES2	1	16	16	0.875	0.88	1.14613	1.15	13	13	1	0	0	0	0	0	0	5'utr
CETN3	1	14	14	0.928571	0.93	1.11394	1.11	11	11	0	0	0	0	1	0	0	start_codon
CFAP20	2	158	79	1.83053	0.92	2.7767	1.39	98	49	1	0	0	0	1	0	0	start_codon
CFAP97	1	12	12	0.916667	0.92	0.740363	0.74	10	10	1	0	0	0	0	0	0	5'utr
CFL1	5	308	13	4.21691	0.83	4.67369	1	183	11	1	0	0	3	1	0	0	3'utr
CFLAR	4	52	8	3.29187	0.85	3.29226	0.85	48	7.5	4	0	0	0	0	0	0	5'utr
CGGBP1	3	35	11	2.66667	1	2.69461	0.95	32	9	1	2	0	0	0	0	0	intron
CH17-118O6.3	2	125	62	1.72606	0.86	2.15412	1.08	35	17.5	0	0	0	0	0	0	0	antisense
CH507-42P11.1	1	10	10	0.7	0.7	0.845098	0.85	8	8	0	0	0	0	0	0	0	processed_pseudogene
CH507-513H4.1	8	475	14	5.31293	0.72	7.28427	0.95	159	11	0	0	0	0	0	0	0	lincRNA_intron
CH507-528H12.1	9	585	22	6.11766	0.71	7.9917	0.78	176	11	0	0	0	0	0	0	0	lincRNA_intron
CHAF1A	1	24	24	0.958333	0.96	1.36173	1.36	16	16	0	0	0	0	1	0	0	start_codon
CHAMP1	3	67	15	1.91905	0.6	1.99564	0.62	50	15	1	0	0	1	0	0	0	5'utr
CHCHD1	2	26	13	1.69925	0.85	1.68124	0.84	24	12	0	0	1	0	1	0	0	start_codon
CHCHD2P6	1	71	71	0.71831	0.72	0.80448	0.8	34	34	0	0	0	0	0	0	0	processed_pseudogene
CHCHD2P9	1	12	12	0.833333	0.83	1	1	6	6	0	0	0	0	0	0	0	processed_pseudogene
CHCHD6	1	14	14	0.642857	0.64	0.954243	0.95	12	12	1	0	0	0	0	0	0	5'utr
CHD1	2	55	27	1.61324	0.81	1.87157	0.94	47	23.5	2	0	0	0	0	0	0	5'utr
CHD4	4	83	17	3.51709	0.86	4.13481	1.02	60	15	1	0	0	2	1	0	0	3'utr
CHD8	1	7	7	1	1	0.845098	0.85	7	7	1	0	0	0	0	0	0	5'utr
CHERP	1	11	11	0.909091	0.91	0.69897	0.7	10	10	0	0	0	0	1	0	0	start_codon
CHI3L2	1	7	7	0.857143	0.86	0.778151	0.78	7	7	1	0	0	0	0	0	0	5'utr
CHIC2	4	74	16	3.63515	0.94	3.74943	0.93	56	11.5	4	0	0	0	0	0	0	5'utr
CHMP1A	2	14	7	2	1	1.6902	0.85	13	6.5	0	0	0	2	0	0	0	3'utr
CHMP2A	1	10	10	0.8	0.8	0.90309	0.9	9	9	0	0	1	0	0	0	0	coding
CHMP2B	1	128	128	0.898438	0.9	1.28255	1.28	78	78	1	0	0	0	0	0	0	5'utr
CHMP4B	2	59	29	1.45588	0.73	1.5563	0.78	55	27.5	1	0	1	0	0	0	0	5'utr
CHMP5	1	15	15	0.8	0.8	0.778151	0.78	15	15	0	0	0	0	1	0	0	start_codon
CHMP6	1	9	9	0.888889	0.89	0.90309	0.9	8	8	0	0	0	1	0	0	0	3'utr
CHMP7	2	23	11	1.85714	0.93	2.03342	1.02	23	11.5	1	0	0	1	0	0	0	5'utr
CHP1	1	12	12	1	1	1.07918	1.08	11	11	0	0	0	0	1	0	0	start_codon
CHPF2	5	58	12	4.05395	0.88	4.76155	1	43	8	5	0	0	0	0	0	0	5'utr
CHRAC1	1	8	8	0.875	0.88	0.845098	0.85	7	7	1	0	0	0	0	0	0	5'utr
CHRNB1	1	12	12	0.75	0.75	0.653213	0.65	12	12	0	0	0	1	0	0	0	3'utr
CHST10	2	20	10	1.75	0.88	1.5563	0.78	18	9	1	0	0	1	0	0	0	3'utr
CHST11	2	205	102	1.69512	0.85	2.38274	1.19	115	57.5	1	0	0	0	1	0	0	5'utr
CHST2	20	1998	43	17.4156	0.89	23.5559	1.23	1287	29.5	4	0	12	2	0	1	0	5'utr
CHSY1	8	756	77	6.69093	0.86	9.35751	1.26	501	45.5	4	0	3	0	1	0	0	coding
CHTF8	6	94	12	5.50006	0.9	5.52489	0.87	83	12.5	0	0	2	4	0	0	0	3'utr
CHTOP	4	120	29	3.27281	0.79	3.97921	1.04	109	25.5	2	1	1	0	0	0	0	5'utr
CHURC1	1	27	27	0.740741	0.74	1.30103	1.3	20	20	0	0	0	0	1	0	0	start_codon
CIAO1	3	77	18	2.82889	0.94	3.83046	1.2	54	15	0	0	1	0	1	0	0	start_codon
CIB1	2	24	12	1.33333	0.67	1.77815	0.89	19	9.5	0	0	1	0	1	0	0	coding
CIC	6	153	20	4.90559	0.85	6.63569	1.07	104	14.5	1	0	0	0	0	0	0	processed_transcript
CIDECP	1	17	17	0.823529	0.82	0.845098	0.85	10	10	0	0	0	0	0	0	0	processed_transcript
CIRBP	3	36	11	2.76389	0.89	2.78958	1.04	34	9	1	1	0	0	0	0	0	intron
CISD2	1	11	11	0.909091	0.91	1	1	10	10	0	0	0	0	1	0	0	start_codon
CISD3	1	7	7	1	1	0.845098	0.85	7	7	0	0	0	0	1	0	0	start_codon
CITED2	1	8	8	1	1	0.90309	0.9	6	6	1	0	0	0	0	0	0	5'utr
CKAP2L	1	8	8	0.625	0.63	0.69897	0.7	8	8	0	0	0	0	1	0	0	start_codon
CKLF-CMTM1	3	83	16	2.78935	0.94	3.17464	1.11	73	15	0	2	0	0	1	0	0	start_codon
CKS1B	1	23	23	0.826087	0.83	1.27875	1.28	20	20	1	0	0	0	0	0	0	5'utr
CKS2	1	262	262	0.854962	0.85	1.30886	1.31	186	186	0	0	0	0	1	0	0	start_codon
CLASP2	1	9	9	0.777778	0.78	0.845098	0.85	8	8	1	0	0	0	0	0	0	5'utr
CLCN3	1	11	11	1	1	1.04139	1.04	5	5	0	0	0	1	0	0	0	3'utr
CLDN15	1	8	8	0.875	0.88	0.845098	0.85	8	8	0	0	1	0	0	0	0	coding
CLEC16A	1	17	17	1	1	1.23045	1.23	7	7	1	0	0	0	0	0	0	5'utr
CLIC1	4	689	12	3.38613	0.85	3.75206	0.94	455	11.5	0	0	2	1	1	0	0	3'utr
CLINT1	2	58	29	1.64399	0.82	1.99417	1	49	24.5	1	0	0	0	0	0	0	5'utr-intron
CLIP3	1	11	11	1	1	1.04139	1.04	11	11	1	0	0	0	0	0	0	5'utr
CLK1	1	9	9	0.666667	0.67	0.778151	0.78	7	7	1	0	0	0	0	0	0	5'utr
CLK2	1	42	42	0.952381	0.95	1.60206	1.6	16	16	1	0	0	0	0	0	0	5'utr
CLN3	3	47	16	2.37386	0.8	3.22531	1.18	39	13	0	2	0	0	1	0	0	start_codon
CLN6	1	8	8	0.625	0.63	0.69897	0.7	8	8	1	0	0	0	0	0	0	5'utr
CLN8	1	8	8	0.875	0.88	0.845098	0.85	4	4	0	0	1	0	0	0	0	coding
CLNS1A	1	12	12	0.75	0.75	0.954243	0.95	10	10	0	0	1	0	0	0	0	coding
CLPP	2	24	12	2	1	2.14613	1.07	22	11	0	0	1	0	0	0	0	coding
CLPTM1L	2	49	24	1.67759	0.84	2.0086	1	45	22.5	2	0	0	0	0	0	0	5'utr
CLPX	2	19	9	1.69318	0.85	1.49831	0.75	18	9	2	0	0	0	0	0	0	5'utr
CLSTN1	1	33	33	0.878788	0.88	1.16137	1.16	21	21	0	0	1	0	0	0	0	coding
CLSTN3	2	20	10	2	1	2	1	19	9.5	2	0	0	0	0	0	0	5'utr
CLTA	2	62	31	1.87148	0.94	2.8537	1.43	52	26	1	0	1	0	0	0	0	5'utr
CLTB	4	126	28	3.4469	0.85	4.25003	0.97	93	19.5	1	0	1	1	1	0	0	3'utr
CLTC	3	38	12	2.77576	0.91	2.89209	1	34	10	3	0	0	0	0	0	0	5'utr
CLUH	4	59	14	3.09596	0.79	3.67247	0.9	48	11	0	2	0	2	0	0	0	3'utr
CMC1	1	8	8	0.75	0.75	0.778151	0.78	7	7	0	0	0	0	1	0	0	start_codon
CMC2	2	49	24	1.74902	0.87	2.59106	1.3	27	13.5	2	0	0	0	0	0	0	5'utr
CMIP	1	13	13	0.692308	0.69	0.954243	0.95	7	7	1	0	0	0	0	0	0	5'utr
CMTM3	5	99	23	4.25334	0.86	4.95439	0.98	86	20	0	0	1	2	0	1	0	intron-5'utr
CMTM6	1	24	24	0.958333	0.96	1.0607	1.06	17	17	0	0	0	0	1	0	0	start_codon
CMTR1	1	7	7	1	1	0.845098	0.85	7	7	1	0	0	0	0	0	0	5'utr
CMTR2	1	16	16	0.8125	0.81	0.812913	0.81	16	16	0	0	0	0	0	0	0	5'utr-intron
CNBP	3	108	14	2.5381	0.86	3.07335	1.08	76	12	2	0	0	0	1	0	0	start_codon
CNDP2	2	36	18	1.56727	0.78	1.92428	0.96	30	15	0	2	0	0	0	0	0	intron
CNEP1R1	1	13	13	0.307692	0.31	0.60206	0.6	7	7	1	0	0	0	0	0	0	5'utr
CNIH4	3	84	12	2.76282	0.92	3.14973	1.04	52	11	0	2	0	0	1	0	0	start_codon
CNN2	2	20	10	1.85714	0.93	1.89209	0.95	18	9	0	0	2	0	0	0	0	coding
CNNM3	1	8	8	0.875	0.88	0.845098	0.85	8	8	0	0	1	0	0	0	0	coding
CNNM4	1	7	7	0.857143	0.86	0.778151	0.78	6	6	1	0	0	0	0	0	0	5'utr
CNOT1	1	23	23	0.913043	0.91	1.32222	1.32	15	15	1	0	0	0	0	0	0	5'utr
CNOT11	1	103	103	0.912621	0.91	1.49601	1.5	57	57	0	0	0	0	1	0	0	start_codon
CNOT3	2	20	10	2	1	1.99564	1	17	8.5	2	0	0	0	0	0	0	5'utr
CNOT6	3	27	8	2.39881	0.86	2.22531	0.78	26	8	2	0	0	0	0	0	0	intron-5'utr
CNOT7	1	8	8	0.875	0.88	0.845098	0.85	8	8	1	0	0	0	0	0	0	5'utr
CNOT8	4	98	17	3.75446	0.94	4.61337	1.2	67	13.5	2	0	0	0	0	0	0	5'utr-intron
CNPPD1	1	8	8	1	1	0.90309	0.9	8	8	1	0	0	0	0	0	0	5'utr
CNPY2	1	43	43	0.790698	0.79	0.832509	0.83	42	42	0	0	0	0	0	0	0	5'utr-intron
CNPY3	4	73	21	3.46681	0.88	4.08493	0.95	50	11	2	0	1	0	1	0	0	5'utr
CNTROB	2	87	43	1.74006	0.87	2.37045	1.19	64	32	2	0	0	0	0	0	0	5'utr
COA4	1	10	10	0.8	0.8	0.60206	0.6	7	7	1	0	0	0	0	0	0	5'utr
COA5	1	9	9	1	1	0.954243	0.95	7	7	0	0	0	0	0	0	0	processed_transcript
COA6	3	50	15	2.44286	0.8	2.89873	1.04	45	11	2	0	0	1	0	0	0	5'utr
COL4A3BP	2	35	17	1.78261	0.89	2.03342	1.02	27	13.5	1	0	1	0	0	0	0	coding
COMMD6	1	14	14	1	1	1.14613	1.15	8	8	0	0	0	0	1	0	0	start_codon
COMT	2	67	33	1.79025	0.9	2.27646	1.14	40	20	2	0	0	0	0	0	0	5'utr
COPB1	1	30	30	0.9	0.9	0.954243	0.95	26	26	0	0	0	0	0	0	0	5'utr-intron
COPB2	1	8	8	1	1	0.90309	0.9	5	5	1	0	0	0	0	0	0	5'utr
COPE	2	26	13	1.59722	0.8	1.65801	0.83	23	11.5	0	0	1	0	1	0	0	coding
COPRS	1	7	7	1	1	0.845098	0.85	6	6	0	0	1	0	0	0	0	coding
COPS3	1	52	52	0.711538	0.71	1.5682	1.57	31	31	1	0	0	0	0	0	0	5'utr
COPS5	1	7	7	1	1	0.845098	0.85	5	5	1	0	0	0	0	0	0	5'utr
COPS7A	1	8	8	1	1	0.90309	0.9	7	7	1	0	0	0	0	0	0	5'utr
COPS7B	3	41	7	2.60317	0.86	2.45939	0.78	33	7	1	0	0	2	0	0	0	5'utr
COPS8	1	15	15	0.733333	0.73	1.04139	1.04	14	14	1	0	0	0	0	0	0	5'utr
COQ10A	1	8	8	0.75	0.75	0.778151	0.78	8	8	1	0	0	0	0	0	0	5'utr
COQ2	2	36	18	1.6798	0.84	1.8451	0.92	17	8.5	0	0	2	0	0	0	0	coding
COQ4	1	11	11	0.909091	0.91	1	1	11	11	0	0	1	0	0	0	0	coding
COQ5	1	23	23	1	1	1.36173	1.36	18	18	0	0	1	0	0	0	0	coding
COQ9	1	10	10	1	1	0.954243	0.95	6	6	0	0	1	0	0	0	0	coding
CORO1A	8	209	10	6.92017	0.87	6.65832	0.82	163	9	0	3	2	0	1	0	0	5'utr-intron
COTL1	2	42	21	1.63926	0.82	2.10209	1.05	30	15	1	0	0	0	1	0	0	start_codon
COX10-AS1	1	15	15	1	1	1.17609	1.18	13	13	0	0	0	0	0	0	0	antisense
COX11P1	1	7	7	1	1	0.845098	0.85	4	4	0	0	0	0	0	0	0	processed_pseudogene
COX16	2	29	14	1.59804	0.8	1.51188	0.76	29	14.5	1	0	0	0	1	0	0	start_codon
COX17	2	23	11	2	1	2.10037	1.05	17	8.5	0	0	1	1	0	0	0	3'utr
COX18	1	11	11	0.818182	0.82	0.954243	0.95	8	8	0	0	1	0	0	0	0	coding
COX20	1	10	10	0.9	0.9	0.954243	0.95	9	9	0	0	0	0	1	0	0	start_codon
COX4I1	1	76	76	0.828947	0.83	1.49831	1.5	58	58	0	0	0	0	0	0	0	processed_transcript
COX5A	1	30	30	0.866667	0.87	1.41497	1.41	26	26	0	0	0	0	1	0	0	start_codon
COX5B	1	30	30	0.966667	0.97	1.4624	1.46	19	19	0	0	1	0	0	0	0	coding
COX6A1	1	9	9	1	1	0.954243	0.95	5	5	0	0	1	0	0	0	0	coding
COX6A1P2	1	11	11	0.909091	0.91	0.69897	0.7	10	10	0	0	0	0	0	0	0	processed_pseudogene
COX6B1	1	31	31	0.870968	0.87	1.43136	1.43	30	30	1	0	0	0	0	0	0	5'utr
COX6C	2	20	10	1.26374	0.63	1.5563	0.78	16	8	1	0	0	0	1	0	0	start_codon
COX7A2	2	40	20	1.625	0.81	1.90309	0.95	39	19.5	0	0	1	1	0	0	0	3'utr
COX7B	1	19	19	0.789474	0.79	1.17609	1.18	18	18	0	0	0	0	1	0	0	start_codon
COX7C	2	198	99	1.52547	0.76	2.67025	1.34	103	51.5	1	0	0	0	1	0	0	5'utr
COX7CP1	1	7	7	0.714286	0.71	0.69897	0.7	6	6	0	0	0	0	0	0	0	processed_pseudogene
COX8A	2	98	49	1.70323	0.85	2.89432	1.45	66	33	1	0	0	0	1	0	0	5'utr
CPEB1	1	8	8	1	1	0.90309	0.9	8	8	0	0	0	0	0	0	0	processed_transcript
CPNE1	1	159	159	0.811321	0.81	1.0692	1.07	120	120	1	0	0	0	0	0	0	5'utr
CPOX	1	7	7	0.857143	0.86	0.778151	0.78	6	6	0	0	1	0	0	0	0	coding
CPSF2	2	59	29	1.88095	0.94	2.79865	1.4	40	20	2	0	0	0	0	0	0	5'utr
CPSF4	1	30	30	0.766667	0.77	0.662758	0.66	25	25	1	0	0	0	0	0	0	5'utr
CPSF7	4	40	10	3.61742	0.89	3.49831	0.9	36	8.5	1	0	1	2	0	0	0	3'utr
CRAMP1L	2	24	12	1.42222	0.71	1.50515	0.75	22	11	0	0	2	0	0	0	0	coding
CRCP	2	20	10	1.92308	0.96	1.92428	0.96	18	9	1	0	0	1	0	0	0	5'utr
CREB1	2	38	19	1.83871	0.92	1.95904	0.98	35	17.5	1	0	0	0	0	0	0	5'utr-intron
CREB3L2	1	14	14	0.714286	0.71	1	1	13	13	1	0	0	0	0	0	0	5'utr
CREBBP	8	330	22	6.3067	0.8	7.89942	0.98	197	16.5	6	0	2	0	0	0	0	coding
CREBZF	6	145	12	5.41383	0.9	6.49471	1	118	11	0	0	5	0	0	0	0	coding
CREM	2	26	13	1.82353	0.91	2.10037	1.05	22	11	2	0	0	0	0	0	0	5'utr
CRHR1-IT1	1	8	8	0.875	0.88	0.845098	0.85	7	7	0	0	0	0	0	0	0	processed_transcript
CRIP2	1	14	14	0.785714	0.79	1.04139	1.04	11	11	0	1	0	0	0	0	0	intron
CRK	2	18	9	1.8	0.9	1.80618	0.9	17	8.5	1	0	1	0	0	0	0	coding
CRKL	5	360	23	4.74874	0.96	5.65817	1.04	253	23	4	0	0	1	0	0	0	5'utr
CRLS1	2	31	15	1.89474	0.95	2.0086	1	22	11	1	0	1	0	0	0	0	5'utr
CRNDE	4	136	7	3.70802	0.93	3.81414	0.87	100	7	0	0	0	0	0	0	0	lincRNA_exon-lincRNA_intron
CROCCP2	3	22	7	2.58929	0.86	2.4014	0.78	18	6	0	0	0	0	0	0	0	lincRNA_exon
CRTC3	1	28	28	0.714286	0.71	0.69897	0.7	25	25	1	0	0	0	0	0	0	5'utr
CRY1	3	42	15	2.5902	0.87	2.61225	0.85	34	9	3	0	0	0	0	0	0	5'utr
CRYBB2P1	1	8	8	0.75	0.75	0.778151	0.78	6	6	0	0	0	0	0	0	0	processed_transcript
CRYZL1	1	15	15	1	1	1.17609	1.18	14	14	1	0	0	0	0	0	0	5'utr
CS	1	20	20	0.9	0.9	0.954243	0.95	19	19	1	0	0	0	0	0	0	5'utr
CSDE1	2	48	24	1.62185	0.81	2.01703	1.01	43	21.5	2	0	0	0	0	0	0	5'utr
CSGALNACT2	2	40	20	1.96154	0.98	2.54407	1.27	27	13.5	2	0	0	0	0	0	0	5'utr
CSK	11	783	13	9.92369	0.89	11.616	1	465	11	5	0	2	2	1	0	0	5'utr
CSNK1A1	5	231	28	4.08089	0.85	5.53521	1.08	177	15	4	0	1	0	0	0	0	coding
CSNK1A1P1	1	7	7	1	1	0.845098	0.85	3	3	0	0	0	0	0	0	0	processed_transcript
CSNK1D	15	196	12	12.5522	0.86	12.3181	0.78	150	10	3	4	0	7	1	0	0	3'utr
CSNK1E	1	52	52	0.826923	0.83	1.03141	1.03	31	31	1	0	0	0	0	0	0	5'utr
CSNK1G2	10	168	10	8.76	0.89	9.24917	0.9	128	9.5	2	0	2	5	0	0	0	5'utr
CSNK1G3	2	22	11	1.61667	0.81	1.88649	0.94	18	9	2	0	0	0	0	0	0	5'utr
CSNK2A1	1	8	8	1	1	0.90309	0.9	7	7	1	0	0	0	0	0	0	5'utr
CSNK2A2	1	66	66	0.893939	0.89	1.46982	1.47	30	30	0	0	0	0	1	0	0	start_codon
CSRNP1	3	27	9	3	1	2.84073	0.95	27	9	1	0	2	0	0	0	0	coding
CSRNP2	2	100	50	1.62667	0.81	2.18998	1.09	55	27.5	1	0	0	0	0	0	0	5'utr
CST3	1	15	15	0.866667	0.87	1.11394	1.11	13	13	0	0	0	0	0	0	0	intron-5'utr
CSTB	1	46	46	0.826087	0.83	0.977724	0.98	31	31	0	0	0	0	1	0	0	start_codon
CSTF1	1	26	26	1	1	1.41497	1.41	22	22	0	0	0	0	0	0	0	5'utr-intron
CSTF3	1	22	22	0.818182	0.82	1.25527	1.26	21	21	1	0	0	0	0	0	0	5'utr
CTAGE5	1	105	105	0.942857	0.94	1.51851	1.52	17	17	1	0	0	0	0	0	0	5'utr
CTB-52I2.4	1	14	14	0.928571	0.93	0.812913	0.81	9	9	0	0	0	0	0	0	0	processed_transcript
CTB-79E8.3	1	19	19	1	1	1.27875	1.28	11	11	0	0	0	0	0	0	0	processed_pseudogene
CTBP1	35	649	12	29.9946	0.86	32.3318	0.9	494	11	3	15	12	4	0	1	0	3'utr
CTBP1-AS2	3	71	20	2.29244	0.77	2.52331	0.85	55	17	0	0	0	0	0	0	0	antisense
CTBS	1	7	7	1	1	0.845098	0.85	6	6	0	0	0	0	1	0	0	start_codon
CTC-338M12.2	1	28	28	0.392857	0.39	1.04139	1.04	6	6	0	0	0	0	0	0	0	lincRNA_exon-lincRNA_intron
CTC-451P13.1	1	10	10	0.9	0.9	0.954243	0.95	7	7	0	0	0	0	0	0	0	processed_pseudogene
CTC-487M23.8	1	40	40	0.9	0.9	1.25527	1.26	29	29	0	0	0	0	1	0	0	start_codon
CTCF	4	167	42	3.4482	0.86	4.16067	1.01	80	19	3	0	1	0	0	0	0	5'utr
CTD-2006C1.2	1	8	8	0.875	0.88	0.845098	0.85	8	8	0	0	0	0	0	0	0	retained_intron
CTD-2020K17.1	1	10	10	0.8	0.8	0.90309	0.9	5	5	0	0	0	0	0	0	0	antisense
CTD-2102P23.1	2	23	11	1.52679	0.76	1.81291	0.91	19	9.5	0	0	0	0	0	0	0	processed_pseudogene
CTD-2192J16.15	1	129	129	0.984496	0.98	2.1038	2.1	13	13	0	0	0	0	0	0	0	processed_pseudogene
CTD-2207O23.3	1	26	26	0.884615	0.88	1.0607	1.06	18	18	0	0	0	1	0	0	0	3'utr
CTD-2228K2.7	6	55	9	5.66923	1	5.2465	0.87	45	6.5	0	0	0	0	0	0	0	antisense
CTD-2287O16.1	1	8	8	1	1	0.90309	0.9	8	8	0	0	0	0	0	0	0	processed_pseudogene
CTD-2336O2.1	1	26	26	0.807692	0.81	0.623249	0.62	23	23	0	0	0	0	0	0	0	antisense
CTD-2587H24.14	1	9	9	0.777778	0.78	0.845098	0.85	9	9	0	0	0	0	0	0	0	retained_intron
CTD-2619J13.14	1	15	15	0.866667	0.87	1.11394	1.11	14	14	0	0	0	0	0	0	0	lincRNA_exon
CTD-3014M21.1	1	22	22	0.909091	0.91	1.30103	1.3	19	19	0	0	0	0	0	0	0	TEC
CTD-3222D19.2	1	15	15	0.933333	0.93	0.845098	0.85	9	9	0	0	0	0	0	0	0	nonsense_mediated_decay
CTDNEP1	9	654	17	7.5814	0.84	9.46967	0.85	436	16	2	0	0	4	1	0	0	3'utr
CTDP1	3	39	12	2.85	1	3.15473	1.08	37	11	0	0	1	1	1	0	0	start_codon
CTDSP1	3	37	11	2.39781	0.86	2.38021	0.78	32	10	1	0	0	2	0	0	0	5'utr
CTDSP2	2	98	49	1.56053	0.78	1.96284	0.98	49	24.5	2	0	0	0	0	0	0	5'utr
CTDSPL	2	26	13	1.77124	0.89	1.77815	0.89	17	8.5	1	0	1	0	0	0	0	5'utr
CTDSPL2	2	21	10	1.66667	0.83	1.5563	0.78	20	10	2	0	0	0	0	0	0	5'utr
CTGLF12P	1	8	8	1	1	0.90309	0.9	2	2	0	0	0	0	0	0	0	processed_transcript
CTNNA1	1	9	9	1	1	0.954243	0.95	9	9	1	0	0	0	0	0	0	5'utr
CTNNB1	3	70	24	2.58918	0.89	3.59406	1.23	51	15	3	0	0	0	0	0	0	5'utr
CTNNBIP1	1	9	9	0.888889	0.89	0.90309	0.9	9	9	1	0	0	0	0	0	0	5'utr
CTPS1	2	25	12	1.83333	0.92	2.10037	1.05	20	10	2	0	0	0	0	0	0	5'utr
CTR9	1	7	7	1	1	0.845098	0.85	6	6	1	0	0	0	0	0	0	5'utr
CTSC	4	80	17	3.55351	0.91	3.74382	0.93	68	13.5	1	0	2	0	1	0	0	coding
CTU1	3	27	9	2.56389	0.88	2.65128	0.9	26	9	0	0	2	1	0	0	0	3'utr
CTXN1	8	214	13	7.18855	0.92	7.57139	0.91	137	11.5	2	0	3	2	1	0	0	3'utr
CUL3	2	28	14	1.54167	0.77	2.04922	1.02	19	9.5	2	0	0	0	0	0	0	5'utr
CUL4A	5	57	8	4.39662	0.86	4.00346	0.78	46	7	0	4	0	0	1	0	0	intron
CUTA	2	37	18	1.79167	0.9	2.3927	1.2	34	17	0	0	1	0	1	0	0	coding
CWC15	1	11	11	0.818182	0.82	0.954243	0.95	10	10	1	0	0	0	0	0	0	5'utr
CXCR4	1	24	24	0.958333	0.96	1.36173	1.36	21	21	0	0	0	0	1	0	0	start_codon
CXXC1	1	15	15	0.933333	0.93	0.845098	0.85	8	8	1	0	0	0	0	0	0	5'utr
CXorf40A	1	7	7	1	1	0.845098	0.85	5	5	1	0	0	0	0	0	0	5'utr
CXorf40B	2	40	20	1.56989	0.78	2.22531	1.11	35	17.5	2	0	0	0	0	0	0	5'utr
CYB5D1	1	7	7	0.857143	0.86	0.778151	0.78	7	7	1	0	0	0	0	0	0	5'utr
CYC1	1	16	16	0.75	0.75	0.778151	0.78	16	16	0	0	0	0	1	0	0	start_codon
CYCS	1	88	88	0.909091	0.91	1.20412	1.2	55	55	1	0	0	0	0	0	0	5'utr
CYHR1	2	106	53	1.61348	0.81	2.55145	1.28	49	24.5	0	2	0	0	0	0	0	intron
CYP26B1	1	11	11	0.909091	0.91	1	1	9	9	0	1	0	0	0	0	0	intron
CYP2R1	1	16	16	1	1	1.20412	1.2	14	14	0	1	0	0	0	0	0	intron
CYSTM1	2	42	21	1.73737	0.87	2.35025	1.18	30	15	1	0	0	0	0	0	0	5'utr
CYTH1	4	41	9	3.75	0.94	3.3592	0.85	32	6	0	0	0	4	0	0	0	3'utr
D2HGDH	1	7	7	0.857143	0.86	0.778151	0.78	7	7	1	0	0	0	0	0	0	5'utr
DAD1	2	19	9	1.69048	0.85	1.77815	0.89	17	8.5	0	0	1	0	1	0	0	coding
DAGLB	1	7	7	1	1	0.845098	0.85	4	4	0	0	0	0	1	0	0	start_codon
DAK	1	8	8	0.875	0.88	0.845098	0.85	7	7	1	0	0	0	0	0	0	5'utr
DANCR	1	9	9	0.777778	0.78	0.845098	0.85	7	7	0	0	0	0	0	0	0	lincRNA_exon
DAP3	1	21	21	0.857143	0.86	0.954243	0.95	16	16	0	0	0	0	0	0	0	intron-5'utr
DAPK3	5	63	13	4.60171	0.89	4.91576	0.95	52	10	1	0	0	4	0	0	0	3'utr
DARS2	3	38	10	2.61429	0.9	2.97543	0.95	31	9	3	0	0	0	0	0	0	5'utr
DAXX	1	25	25	0.8	0.8	1	1	22	22	1	0	0	0	0	0	0	5'utr
DAZAP1	2	64	32	1.4963	0.75	2.00145	1	47	23.5	1	0	0	0	1	0	0	5'utr
DAZAP2	1	8	8	1	1	0.90309	0.9	8	8	0	0	0	0	1	0	0	start_codon
DBF4	1	47	47	0.510638	0.51	0.778151	0.78	38	38	0	0	0	0	1	0	0	start_codon
DBF4B	1	7	7	1	1	0.845098	0.85	6	6	0	1	0	0	0	0	0	intron
DBI	2	17	8	1.76389	0.88	1.74819	0.87	17	8.5	0	0	0	1	1	0	0	start_codon
DBN1	1	18	18	0.777778	0.78	1.14613	1.15	13	13	1	0	0	0	0	0	0	5'utr
DBNDD2	3	25	9	3	1	2.75358	0.95	21	7	0	0	2	0	1	0	0	start_codon
DBR1	1	14	14	0.571429	0.57	0.60206	0.6	12	12	0	0	0	0	1	0	0	start_codon
DCAF12	4	87	19	3.44788	0.86	4.10037	0.98	64	15.5	4	0	0	0	0	0	0	5'utr
DCAF16	2	64	32	1.63765	0.82	1.74036	0.87	55	27.5	2	0	0	0	0	0	0	5'utr
DCAF7	2	122	61	1.75332	0.88	2.85003	1.43	77	38.5	1	0	0	0	1	0	0	5'utr
DCAF8	3	26	9	2.71429	1	2.65321	0.95	22	7	2	0	1	0	0	0	0	coding
DCAKD	3	33	10	2.85714	1	2.73239	0.95	31	9	1	1	0	1	0	0	0	3'utr
DCK	1	18	18	0.944444	0.94	0.929419	0.93	11	11	1	0	0	0	0	0	0	5'utr
DCLRE1B	3	33	10	2.49231	0.8	2.25527	0.65	29	9	1	0	2	0	0	0	0	5'utr
DCP2	3	52	18	2.75926	0.94	2.81591	0.93	37	9	2	0	1	0	0	0	0	5'utr
DCTD	5	131	23	4.02906	0.83	4.4655	0.82	95	17	0	4	0	0	1	0	0	intron
DCTN2	1	17	17	0.882353	0.88	0.875061	0.88	13	13	1	0	0	0	0	0	0	5'utr
DCTN3	2	39	19	1.69655	0.85	2.01703	1.01	28	14	0	0	1	0	1	0	0	coding
DCTN5	3	47	14	2.48352	0.77	2.8451	0.85	43	14	1	0	0	1	1	0	0	5'utr
DCTPP1	1	20	20	0.95	0.95	1.27875	1.28	17	17	0	0	1	0	0	0	0	coding
DCUN1D5	1	212	212	0.872642	0.87	1.31293	1.31	155	155	1	0	0	0	0	0	0	5'utr
DCXR	1	7	7	1	1	0.845098	0.85	7	7	0	0	1	0	0	0	0	coding
DDA1	1	38	38	0.973684	0.97	1.5682	1.57	30	30	1	0	0	0	0	0	0	5'utr
DDAH2	2	26	13	1.54762	0.77	1.69897	0.85	24	12	1	0	0	0	1	0	0	start_codon
DDHD1	2	16	8	1.4127	0.71	1.47712	0.74	16	8	1	0	1	0	0	0	0	coding
DDI2	2	18	9	1.85714	0.93	1.81954	0.91	11	5.5	1	0	1	0	0	0	0	5'utr
DDIT3	2	19	9	1.60714	0.8	1.73239	0.87	19	9.5	1	0	1	0	0	0	0	coding
DDIT4	3	58	12	2.28022	0.86	2.51055	0.78	49	9	1	0	0	2	0	0	0	5'utr
DDOST	1	9	9	0.888889	0.89	0.90309	0.9	7	7	0	0	1	0	0	0	0	coding
DDR1	2	28	14	1.41667	0.71	1.34242	0.67	24	12	1	1	0	0	0	0	0	intron
DDX1	1	7	7	0.571429	0.57	0.60206	0.6	5	5	1	0	0	0	0	0	0	5'utr
DDX11	1	8	8	1	1	0.90309	0.9	5	5	1	0	0	0	0	0	0	5'utr
DDX17	3	48	9	2.1622	0.71	2.39794	0.78	44	9	0	0	2	0	0	0	0	coding
DDX20	1	8	8	0.75	0.75	0.778151	0.78	7	7	0	0	1	0	0	0	0	coding
DDX21	1	7	7	1	1	0.845098	0.85	7	7	0	0	0	0	1	0	0	start_codon
DDX24	1	12	12	0.75	0.75	0.653213	0.65	9	9	1	0	0	0	0	0	0	5'utr
DDX39B	5	92	8	4.51725	0.86	4.56773	0.9	88	8	1	1	2	0	1	0	0	intron
DDX3X	1	28	28	0.892857	0.89	1.09691	1.1	18	18	0	0	0	0	1	0	0	start_codon
DDX46	2	15	7	1.875	0.94	1.6902	0.85	15	7.5	1	0	0	0	1	0	0	5'utr
DDX5	5	191	14	4.37526	0.91	5.22011	1	164	13	0	2	2	0	1	0	0	coding
DDX51	1	9	9	0.888889	0.89	0.60206	0.6	7	7	0	0	1	0	0	0	0	coding
DDX6	1	7	7	0.857143	0.86	0.778151	0.78	7	7	0	0	0	1	0	0	0	3'utr
DEAF1	2	108	54	1.78013	0.89	2.87245	1.44	88	44	2	0	0	0	0	0	0	5'utr
DEDD2	2	20	10	1.7	0.85	1.5563	0.78	17	8.5	0	1	1	0	0	0	0	coding
DEF6	1	7	7	1	1	0.845098	0.85	3	3	0	0	1	0	0	0	0	coding
DEK	2	31	15	1.42727	0.71	1.44716	0.72	22	11	1	0	0	0	1	0	0	start_codon
DENND1B	1	8	8	0.875	0.88	0.845098	0.85	7	7	1	0	0	0	0	0	0	5'utr
DENND4B	8	101	8	6.83426	0.86	7.19256	0.87	87	8.5	4	0	3	0	0	0	0	coding
DENND5A	1	22	22	0.909091	0.91	1.30103	1.3	19	19	1	0	0	0	0	0	0	5'utr
DENR	1	11	11	0.909091	0.91	1	1	10	10	1	0	0	0	0	0	0	5'utr
DERL1	2	26	13	1.53846	0.77	1.38021	0.69	23	11.5	2	0	0	0	0	0	0	5'utr
DESI1	2	18	9	1.775	0.89	1.79934	0.9	18	9	2	0	0	0	0	0	0	5'utr
DESI2	3	117	16	2.70612	0.89	2.88332	0.85	78	14	0	0	0	0	0	0	0	processed_transcript
DEXI	5	128	16	4.36372	0.87	5.20334	0.9	68	9	4	0	0	0	1	0	0	start_codon
DFFA	1	7	7	0.571429	0.57	0.60206	0.6	5	5	0	0	1	0	0	0	0	coding
DFNB31	2	29	14	1.875	0.94	2.16732	1.08	21	10.5	2	0	0	0	0	0	0	5'utr
DGCR14	1	7	7	1	1	0.845098	0.85	7	7	0	0	0	1	0	0	0	3'utr
DGCR8	5	58	10	4.63203	1	4.68699	0.9	47	8	2	0	0	2	0	1	0	5'utr
DGKZ	3	50	12	2.66667	0.92	3.29667	1.04	26	8	0	0	1	1	1	0	0	start_codon
DGUOK	1	13	13	0.846154	0.85	1.04139	1.04	8	8	0	0	0	0	1	0	0	start_codon
DHCR24	1	7	7	0.857143	0.86	0.778151	0.78	5	5	1	0	0	0	0	0	0	5'utr
DHCR7	1	22	22	0.954545	0.95	1.32222	1.32	14	14	0	0	0	0	0	0	0	5'utr-intron
DHFR	1	10	10	0.9	0.9	0.954243	0.95	10	10	1	0	0	0	0	0	0	5'utr
DHRS13	1	7	7	0.857143	0.86	0.778151	0.78	7	7	0	0	1	0	0	0	0	coding
DHRS7	1	7	7	1	1	0.845098	0.85	7	7	0	0	0	0	1	0	0	start_codon
DHRSX	1	34	34	0.970588	0.97	1.21748	1.22	29	29	0	0	0	0	1	0	0	start_codon
DHX15	1	65	65	0.846154	0.85	0.837273	0.84	52	52	1	0	0	0	0	0	0	5'utr
DHX16	2	24	12	1.68571	0.84	1.69461	0.85	18	9	0	0	1	0	1	0	0	coding
DHX30	3	35	8	2.73214	0.88	2.92428	0.85	33	8	0	0	3	0	0	0	0	coding
DHX33	1	7	7	1	1	0.845098	0.85	3	3	1	0	0	0	0	0	0	5'utr
DIAPH1	6	162	17	5.13949	0.91	5.58084	0.9	117	12.5	0	0	1	4	1	0	0	3'utr
DIDO1	4	89	16	3.73214	0.94	4.26045	0.97	51	13	0	0	4	0	0	0	0	coding
DIMT1	1	23	23	0.869565	0.87	1.30103	1.3	17	17	1	0	0	0	0	0	0	5'utr
DISC1FP1	2	38	19	1.45833	0.73	1.79588	0.9	30	15	0	0	0	0	0	0	0	lincRNA_intron
DKC1	2	51	25	1.61818	0.81	1.98227	0.99	44	22	2	0	0	0	0	0	0	5'utr
DLAT	1	17	17	0.823529	0.82	1.14613	1.15	16	16	0	0	0	0	1	0	0	start_codon
DLG1	2	121	60	1.63801	0.82	2.40635	1.2	94	47	0	1	0	0	0	0	0	intron
DLG4	2	26	13	1.70238	0.85	1.78176	0.89	21	10.5	0	1	0	1	0	0	0	3'utr
DLGAP4	1	8	8	1	1	0.90309	0.9	7	7	0	0	1	0	0	0	0	coding
DLGAP5	1	10	10	1	1	1	1	10	10	1	0	0	0	0	0	0	5'utr
DMC1	1	12	12	0.916667	0.92	0.740363	0.74	11	11	1	0	0	0	0	0	0	5'utr
DMPK	4	45	11	3.4869	0.93	3.86213	1.01	43	11	0	0	4	0	0	0	0	coding
DMWD	4	83	17	3.80662	0.96	4.36044	1.05	65	14.5	0	0	3	1	0	0	0	3'utr
DMXL1	3	36	12	2.65035	0.92	2.76042	1.08	33	11	0	0	0	0	0	0	0	processed_transcript
DNA2	1	8	8	0.75	0.75	0.778151	0.78	8	8	0	0	0	0	1	0	0	start_codon
DNAAF2	1	8	8	1	1	0.90309	0.9	8	8	0	0	1	0	0	0	0	coding
DNAJA1	1	158	158	0.873418	0.87	1.53782	1.54	79	79	0	0	0	0	0	0	0	5'utr-intron
DNAJA2	1	12	12	0.916667	0.92	1.04139	1.04	9	9	0	0	0	0	1	0	0	start_codon
DNAJA3	1	15	15	0.866667	0.87	1.11394	1.11	13	13	0	0	1	0	0	0	0	coding
DNAJB1	1	10	10	0.7	0.7	0.845098	0.85	8	8	0	0	1	0	0	0	0	coding
DNAJB11	2	44	22	1.65833	0.83	2.03073	1.02	34	17	2	0	0	0	0	0	0	5'utr
DNAJB2	3	23	7	2.71429	0.86	2.51055	0.78	20	7	0	0	0	3	0	0	0	3'utr
DNAJC1	1	10	10	0.9	0.9	0.954243	0.95	9	9	0	0	1	0	0	0	0	coding
DNAJC10	2	22	11	1.81667	0.91	1.69461	0.85	18	9	2	0	0	0	0	0	0	5'utr
DNAJC19	1	58	58	0.672414	0.67	1.29003	1.29	27	27	1	0	0	0	0	0	0	5'utr
DNAJC21	3	105	22	2.61533	0.87	3.5665	1.13	60	13	2	0	1	0	0	0	0	5'utr
DNAJC5	6	75	8	5.39692	0.93	5.85664	0.9	62	7	1	0	0	5	0	0	0	5'utr
DNAJC8	1	32	32	0.96875	0.97	1.19033	1.19	26	26	0	0	0	0	1	0	0	start_codon
DNAJC9	3	38	13	2.92308	1	2.91169	0.9	33	12	0	0	2	0	1	0	0	coding
DNASE1	2	17	8	2	1	1.8451	0.92	17	8.5	0	0	0	1	0	0	0	nonsense_mediated_decay
DNM2	1	10	10	0.9	0.9	0.954243	0.95	10	10	0	0	0	1	0	0	0	3'utr
DNMT1	1	8	8	0.875	0.88	0.845098	0.85	8	8	0	0	1	0	0	0	0	coding
DNPH1	1	12	12	1	1	1.07918	1.08	9	9	0	0	1	0	0	0	0	coding
DOHH	7	107	12	6.44439	0.91	6.65452	1	89	12	2	0	2	3	0	0	0	3'utr
DOK2	1	10	10	0.9	0.9	0.653213	0.65	10	10	0	0	0	0	1	0	0	start_codon
DOT1L	3	28	9	2.75	1	2.45255	0.85	27	9	0	0	1	2	0	0	0	coding
DPAGT1	2	39	19	1.89286	0.95	2.1383	1.07	32	16	1	0	0	0	0	0	0	5'utr
DPF2	1	9	9	1	1	0.954243	0.95	6	6	0	0	1	0	0	0	0	coding
DPH3	1	8	8	0.875	0.88	0.845098	0.85	7	7	1	0	0	0	0	0	0	5'utr
DPM2	2	14	7	1.85714	0.93	1.5563	0.78	13	6.5	1	0	0	1	0	0	0	3'utr
DPP7	1	12	12	0.916667	0.92	1.04139	1.04	9	9	0	0	1	0	0	0	0	coding
DPP8	1	21	21	0.904762	0.9	0.977724	0.98	21	21	1	0	0	0	0	0	0	5'utr
DPP9	4	41	10	3.6	0.9	3.55194	0.95	36	9.5	2	0	1	1	0	0	0	3'utr
DPY19L3	1	10	10	1	1	1	1	7	7	1	0	0	0	0	0	0	5'utr
DPY30	1	8	8	1	1	0.90309	0.9	7	7	1	0	0	0	0	0	0	5'utr
DR1	3	268	15	2.38265	0.8	2.91169	1.05	186	14	3	0	0	0	0	0	0	5'utr
DSN1	3	42	10	2.95833	1	3.26482	1	33	9	2	0	0	0	0	0	0	5'utr
DTL	1	8	8	0.875	0.88	0.845098	0.85	8	8	1	0	0	0	0	0	0	5'utr
DTNBP1	2	73	36	1.71282	0.86	2.15534	1.08	58	29	2	0	0	0	0	0	0	5'utr
DTYMK	2	21	10	1.85714	0.93	1.92428	0.96	14	7	0	0	1	1	0	0	0	3'utr
DUS3L	2	19	9	1.875	0.94	1.88649	0.94	19	9.5	0	0	1	0	0	1	0	stop_codon
DUSP1	1	8	8	0.875	0.88	0.845098	0.85	5	5	1	0	0	0	0	0	0	5'utr
DUSP2	12	4401	105	10.2926	0.85	15.1122	1.24	2025	66	1	0	7	1	1	1	0	3'utr
DUSP22	2	27	13	1.8125	0.91	2.15534	1.08	22	11	2	0	0	0	0	0	0	5'utr
DUSP5	7	177	17	5.77789	0.79	6.49741	0.88	142	16	2	0	5	0	0	0	0	5'utr
DUT	1	21	21	0.809524	0.81	0.929419	0.93	18	18	0	0	0	0	1	0	0	start_codon
DUXAP10	1	10	10	0.9	0.9	0.954243	0.95	9	9	0	0	0	0	0	0	0	processed_transcript
DVL2	1	12	12	0.916667	0.92	0.740363	0.74	9	9	1	0	0	0	0	0	0	5'utr
DXO	1	9	9	0.777778	0.78	0.845098	0.85	9	9	1	0	0	0	0	0	0	5'utr
DYNLL1	1	9	9	0.888889	0.89	0.90309	0.9	8	8	0	0	0	0	0	0	0	5'utr-intron
DYNLL2	5	123	10	4.42482	0.87	4.79351	0.87	91	7	2	0	0	3	0	0	0	5'utr
DYNLRB1	1	7	7	0.857143	0.86	0.778151	0.78	7	7	1	0	0	0	0	0	0	5'utr
DYRK1A	7	1078	38	6.08647	0.83	7.83634	1.12	468	23	0	0	1	1	0	0	0	processed_transcript
DYRK3	1	39	39	0.871795	0.87	1.05436	1.05	33	33	0	0	0	0	1	0	0	start_codon
E2F1	3	94	28	2.57574	0.88	3.31234	1.06	63	19	0	0	1	1	1	0	0	3'utr
E2F2	7	283	21	6.0131	0.89	7.72292	1.18	204	16	4	0	1	2	0	0	0	3'utr
E2F3	3	35	9	2.31373	0.67	2.77379	0.95	28	8	2	1	0	0	0	0	0	5'utr
E2F4	2	21	10	1.85714	0.93	1.62325	0.81	21	10.5	0	0	0	0	1	1	0	start_codon
E2F5	1	9	9	0.888889	0.89	0.90309	0.9	8	8	1	0	0	0	0	0	0	5'utr
E2F6	2	32	16	1.78261	0.89	1.60746	0.8	26	13	2	0	0	0	0	0	0	5'utr
E2F7	1	7	7	0.857143	0.86	0.778151	0.78	7	7	1	0	0	0	0	0	0	5'utr
EAF1	2	38	19	1.78947	0.89	1.85733	0.93	32	16	1	0	0	0	1	0	0	5'utr
EBNA1BP2	1	16	16	1	1	1.20412	1.2	12	12	0	1	0	0	0	0	0	intron
EBP	1	10	10	0.7	0.7	0.845098	0.85	10	10	1	0	0	0	0	0	0	5'utr
EBPL	1	7	7	0.857143	0.86	0.778151	0.78	6	6	0	0	1	0	0	0	0	coding
ECHDC1	1	7	7	1	1	0.845098	0.85	7	7	0	0	1	0	0	0	0	coding
ECSIT	1	13	13	1	1	1.11394	1.11	10	10	0	0	1	0	0	0	0	coding
ECT2	1	7	7	1	1	0.845098	0.85	6	6	1	0	0	0	0	0	0	5'utr
EDC3	2	68	34	1.77518	0.89	2.04922	1.02	66	33	1	0	0	1	0	0	0	3'utr
EDC4	2	44	22	1.65684	0.83	2.03073	1.02	38	19	2	0	0	0	0	0	0	5'utr
EDEM1	7	142	18	5.81013	0.82	6.55289	0.88	125	16	1	0	4	1	1	0	0	5'utr
EDEM2	1	11	11	1	1	1.04139	1.04	6	6	0	0	1	0	0	0	0	coding
EDF1	1	23	23	0.869565	0.87	1.30103	1.3	19	19	0	0	0	0	1	0	0	start_codon
EED	3	31	9	2.78571	1	2.89873	0.95	26	8	3	0	0	0	0	0	0	5'utr
EEF1D	1	22	22	1	1	1.34242	1.34	18	18	1	0	0	0	0	0	0	5'utr
EEF1DP1	1	18	18	0.833333	0.83	0.875061	0.88	13	13	0	0	0	0	0	0	0	processed_pseudogene
EEF1GP5	1	17	17	0.529412	0.53	0.653213	0.65	14	14	0	0	0	0	0	0	0	processed_pseudogene
EEF2	5	61	9	4.55	1	4.50079	0.9	43	7	0	0	2	2	1	0	0	3'utr
EFHD2	7	144	15	5.48614	0.81	6.8026	0.99	123	12	0	0	1	5	1	0	0	start_codon
EFNB1	4	37	9	3.3254	0.81	3.19728	0.77	30	7.5	4	0	0	0	0	0	0	5'utr
EGLN1	2	15	7	1.85714	0.93	1.68124	0.84	13	6.5	2	0	0	0	0	0	0	5'utr
EGLN2	2	27	13	1.66667	0.83	1.74819	0.87	24	12	1	0	1	0	0	0	0	5'utr
EGR1	19	2076	24	15.538	0.86	21.3439	1.08	1015	20	1	0	11	6	1	0	0	5'utr
EGR2	2	22	11	1.84615	0.92	1.99564	1	15	7.5	1	0	1	0	0	0	0	coding
EHD1	2	15	7	1.46429	0.73	1.47712	0.74	14	7	0	0	0	2	0	0	0	3'utr
EI24	1	7	7	0.857143	0.86	0.778151	0.78	7	7	1	0	0	0	0	0	0	5'utr
EID1	1	9	9	1	1	0.954243	0.95	5	5	0	0	0	1	0	0	0	3'utr
EIF1	10	1002	39	7.5523	0.76	10.2931	1.01	601	35	1	0	2	5	0	1	0	processed_transcript
EIF1AD	5	66	10	4.30426	0.88	4.72591	0.98	61	9	3	0	0	1	0	0	0	3'utr
EIF1AX	1	13	13	1	1	1.11394	1.11	13	13	1	0	0	0	0	0	0	5'utr
EIF1AXP1	1	19	19	0.947368	0.95	1.25527	1.26	17	17	0	0	0	0	0	0	0	processed_pseudogene
EIF1B	5	126	11	3.87408	0.82	5.15498	0.95	91	10	2	0	2	1	0	0	0	5'utr
EIF1P3	1	10	10	0.5	0.5	0.69897	0.7	10	10	0	0	0	0	0	0	0	processed_pseudogene
EIF2AK1	1	8	8	1	1	0.90309	0.9	7	7	1	0	0	0	0	0	0	5'utr
EIF2AK3	1	8	8	0.875	0.88	0.845098	0.85	7	7	0	0	1	0	0	0	0	coding
EIF2B1	1	19	19	0.894737	0.89	0.753328	0.75	14	14	0	0	0	0	1	0	0	start_codon
EIF2S1	2	38	19	1.60615	0.8	2.32015	1.16	32	16	2	0	0	0	0	0	0	5'utr
EIF3A	2	22	11	1.44762	0.72	1.74036	0.87	19	9.5	0	0	2	0	0	0	0	coding
EIF3B	2	26	13	1.66667	0.83	2.0086	1	23	11.5	0	0	1	0	1	0	0	start_codon
EIF3C	2	22	11	2	1	2.02119	1.01	11	5.5	0	0	1	0	0	0	0	5'utr-intron
EIF3CL	1	21	21	0.952381	0.95	1.30103	1.3	4	4	0	0	1	0	0	0	0	coding
EIF3G	2	29	14	1.65152	0.83	1.65321	0.83	22	11	0	0	1	0	0	0	0	coding
EIF3I	1	7	7	1	1	0.845098	0.85	7	7	0	0	1	0	0	0	0	coding
EIF3J	2	62	31	1.36623	0.68	1.24818	0.62	40	20	0	0	2	0	0	0	0	coding
EIF3K	1	11	11	0.636364	0.64	0.845098	0.85	11	11	1	0	0	0	0	0	0	5'utr
EIF3M	3	39	14	2.24875	0.85	2.89873	1.04	32	10	0	0	1	0	1	0	0	nonsense_mediated_decay
EIF4A3	1	129	129	0.844961	0.84	0.996034	1	98	98	0	0	0	0	1	0	0	start_codon
EIF4G1	7	347	13	5.91939	0.84	6.51761	0.85	164	13	1	0	1	3	0	1	0	5'utr
EIF4G2	10	366	21	8.53345	0.85	10.8116	0.93	289	19	1	0	4	1	0	1	0	3'utr
EIF4G3	3	120	40	2.42043	0.83	3.28443	1.14	63	15	1	2	0	0	0	0	0	intron
EIF4H	1	15	15	0.866667	0.87	0.812913	0.81	14	14	0	0	0	1	0	0	0	3'utr
EIF5	4	177	22	3.34531	0.86	4.3543	1.09	128	13	2	1	0	0	0	0	0	intron
EIF5A	5	552	41	4.4152	0.93	6.63707	1.28	347	30	1	0	0	3	1	0	0	5'utr
EIF5AL1	5	216	16	4.38216	0.82	5.87613	1.11	83	9	1	0	0	4	0	0	0	5'utr
EIF5B	1	9	9	1	1	0.954243	0.95	9	9	1	0	0	0	0	0	0	5'utr
EIF6	2	22	11	1.83333	0.92	1.69897	0.85	22	11	0	0	1	1	0	0	0	3'utr
ELAVL1	3	38	15	2.35	0.8	2.63548	0.78	37	14	0	1	0	2	0	0	0	3'utr
ELF1	6	310	21	4.68801	0.79	5.82362	1.05	164	17.5	2	1	0	1	1	0	0	3'utr
ELK1	3	27	8	2.875	1	2.78958	0.9	25	8	1	0	1	1	0	0	0	3'utr
ELK4	2	32	16	1.71255	0.86	2.25527	1.13	30	15	2	0	0	0	0	0	0	5'utr
ELMSAN1	6	86	11	5.68889	0.97	6.02049	0.98	65	9.5	5	0	1	0	0	0	0	coding
ELOVL4	2	32	16	1.78333	0.89	1.67669	0.84	16	8	2	0	0	0	0	0	0	5'utr
ELOVL5	3	95	13	2.51845	0.85	2.45322	0.85	65	10	2	1	0	0	0	0	0	intron
ELP5	3	62	10	2.82955	0.95	3.46835	1	45	8	1	0	1	0	0	0	0	5'utr-intron
EMB	1	25	25	0.8	0.8	1.30103	1.3	18	18	1	0	0	0	0	0	0	5'utr
EMC10	3	27	9	2.88889	1	2.78958	0.9	21	7	0	0	2	1	0	0	0	coding
EMC3-AS1	1	11	11	0.909091	0.91	1	1	10	10	0	0	0	0	0	0	0	processed_transcript
EMC4	1	31	31	0.903226	0.9	1.44716	1.45	29	29	1	0	0	0	0	0	0	5'utr
EMC6	1	10	10	0.8	0.8	0.90309	0.9	9	9	0	0	0	0	1	0	0	start_codon
EMC7	2	32	16	1.58182	0.79	1.65321	0.83	31	15.5	0	0	1	0	1	0	0	coding
EMC8	3	179	24	2.77976	0.9	3.65019	1.38	94	20	2	0	0	1	0	0	0	3'utr
EMC9	1	11	11	0.909091	0.91	1	1	11	11	1	0	0	0	0	0	0	5'utr
EMD	1	25	25	0.76	0.76	0.977724	0.98	21	21	1	0	0	0	0	0	0	5'utr
EMILIN2	1	15	15	0.8	0.8	1.07918	1.08	9	9	0	1	0	0	0	0	0	intron
EML3	1	13	13	0.846154	0.85	0.740363	0.74	11	11	1	0	0	0	0	0	0	5'utr
EMP3	1	26	26	0.884615	0.88	1.0607	1.06	21	21	1	0	0	0	0	0	0	5'utr
ENDOG	3	34	11	2.64126	0.9	2.68664	0.95	28	9	1	0	2	0	0	0	0	5'utr
ENKD1	1	7	7	1	1	0.845098	0.85	7	7	1	0	0	0	0	0	0	5'utr
ENO1	4	278	11	3.50077	0.88	3.46555	0.69	169	10.5	0	0	3	0	0	0	0	coding
ENOPH1	4	71	14	3.3622	0.86	3.29491	0.73	50	9.5	3	0	0	0	1	0	0	5'utr
ENSA	2	45	22	1.51186	0.76	1.85884	0.93	36	18	0	0	0	1	1	0	0	3'utr
ENTPD4	1	12	12	1	1	1.07918	1.08	5	5	1	0	0	0	0	0	0	5'utr
EP300	8	499	40	6.54359	0.83	9.17841	1.23	303	22.5	8	0	0	0	0	0	0	5'utr
EP400	1	10	10	0.8	0.8	0.60206	0.6	5	5	0	0	1	0	0	0	0	coding
EP400NL	3	42	11	2.82576	0.92	2.88649	0.85	36	7	1	0	1	0	0	0	0	processed_transcript
EPAS1	1	9	9	1	1	0.954243	0.95	6	6	1	0	0	0	0	0	0	5'utr
EPB41L4A-AS1	1	10	10	0.7	0.7	0.845098	0.85	10	10	0	0	0	0	0	0	0	lincRNA_exon
EPC1	1	7	7	1	1	0.845098	0.85	2	2	1	0	0	0	0	0	0	5'utr
EPC2	1	7	7	0.714286	0.71	0.69897	0.7	4	4	0	0	1	0	0	0	0	coding
EPDR1	3	29	8	2.78571	1	2.48855	0.85	25	7	2	0	1	0	0	0	0	5'utr
EPHB6	3	28	7	2.64286	0.86	2.66464	0.85	26	7	2	0	1	0	0	0	0	5'utr
EPN1	1	10	10	1	1	1	1	5	5	1	0	0	0	0	0	0	5'utr
EPPK1	1	19	19	0.947368	0.95	1.25527	1.26	4	4	0	0	1	0	0	0	0	coding
EPT1	1	7	7	1	1	0.845098	0.85	7	7	1	0	0	0	0	0	0	5'utr
ERAL1	2	16	8	1.77778	0.89	1.6902	0.85	11	5.5	0	0	1	0	1	0	0	start_codon
ERCC1	1	7	7	0.714286	0.71	0.69897	0.7	7	7	1	0	0	0	0	0	0	5'utr
ERCC3	1	10	10	1	1	1	1	9	9	1	0	0	0	0	0	0	5'utr
ERCC5	2	14	7	1.85714	0.93	1.62325	0.81	13	6.5	1	0	0	0	1	0	0	5'utr
ERF	7	111	17	5.3864	0.71	5.65128	0.82	93	15	0	0	2	4	0	1	0	3'utr
ERGIC2	1	10	10	0.9	0.9	0.954243	0.95	10	10	1	0	0	0	0	0	0	5'utr
ERH	3	86	17	2.81895	0.94	3.75679	1.2	69	17	1	0	0	2	0	0	0	3'utr
ERICH1	1	7	7	1	1	0.845098	0.85	6	6	0	0	0	0	1	0	0	start_codon
ERLEC1	1	20	20	0.95	0.95	0.977724	0.98	17	17	0	0	0	0	1	0	0	start_codon
ERO1L	1	8	8	0.875	0.88	0.845098	0.85	6	6	0	0	0	0	0	0	0	nonsense_mediated_decay
ERO1LB	2	21	10	1.92857	0.96	1.95904	0.98	20	10	1	0	0	0	1	0	0	start_codon
ERP29	1	18	18	0.888889	0.89	1.20412	1.2	15	15	0	0	0	0	1	0	0	start_codon
ERP44	1	11	11	0.909091	0.91	1	1	11	11	1	0	0	0	0	0	0	5'utr
ERVK3-1	3	40	14	2.70635	0.93	2.38501	0.81	34	11	0	0	0	0	0	0	0	lincRNA_exon
ESCO1	1	20	20	0.7	0.7	1.14613	1.15	19	19	1	0	0	0	0	0	0	5'utr
ESRRA	1	10	10	1	1	1	1	7	7	1	0	0	0	0	0	0	5'utr
ESYT2	2	94	47	1.87083	0.94	2.6744	1.34	62	31	0	0	1	0	0	0	0	coding
ETFB	1	22	22	0.909091	0.91	1.30103	1.3	17	17	0	0	0	0	1	0	0	start_codon
ETNK1	1	21	21	0.952381	0.95	1.30103	1.3	20	20	0	0	1	0	0	0	0	coding
ETS1	4	115	11	3.47467	0.87	3.88332	0.98	88	11	2	0	0	1	1	0	0	3'utr
ETS2	2	25	12	1.85714	0.93	2.12057	1.06	20	10	1	0	0	0	0	0	0	intron-5'utr
ETV3	1	18	18	0.944444	0.94	1.23045	1.23	15	15	1	0	0	0	0	0	0	5'utr
ETV6	3	33	11	2.72106	0.91	2.68124	0.9	30	10	3	0	0	0	0	0	0	5'utr
EVL	5	70	13	4.4562	0.88	5.43303	1.04	54	10	5	0	0	0	0	0	0	5'utr
EXO1	2	45	22	1.94286	0.97	2.51851	1.26	31	15.5	2	0	0	0	0	0	0	5'utr
EXOC1	1	7	7	1	1	0.845098	0.85	5	5	1	0	0	0	0	0	0	5'utr
EXOC2	1	8	8	1	1	0.90309	0.9	7	7	1	0	0	0	0	0	0	5'utr
EXOC7	2	18	9	1.77778	0.89	1.80618	0.9	17	8.5	0	0	0	2	0	0	0	3'utr
EXOSC3	3	37	11	2.7136	0.91	3.03342	1	30	10	0	0	3	0	0	0	0	coding
EXOSC4	1	23	23	0.956522	0.96	1.34242	1.34	21	21	0	0	0	0	1	0	0	start_codon
EXOSC6	5	87	17	4.12224	0.88	4.85588	0.9	73	15	0	0	5	0	0	0	0	coding
EXOSC8	1	9	9	0.888889	0.89	0.60206	0.6	9	9	0	0	0	0	1	0	0	start_codon
EXT2	1	14	14	0.857143	0.86	0.778151	0.78	14	14	1	0	0	0	0	0	0	5'utr
FADD	1	34	34	0.823529	0.82	1.14613	1.15	16	16	1	0	0	0	0	0	0	5'utr
FADS2	12	267	12	8.83145	0.71	10.1666	0.85	234	11.5	2	0	0	9	1	0	0	5'utr
FAF1	1	17	17	0.764706	0.76	0.812913	0.81	15	15	1	0	0	0	0	0	0	5'utr
FAM102A	2	26	13	1.69444	0.85	2.0086	1	22	11	1	0	0	1	0	0	0	3'utr
FAM102B	1	20	20	0.85	0.85	1.23045	1.23	15	15	1	0	0	0	0	0	0	5'utr
FAM103A1	1	29	29	0.896552	0.9	1.11394	1.11	17	17	1	0	0	0	0	0	0	5'utr
FAM104A	1	15	15	0.933333	0.93	1.14613	1.15	14	14	0	0	1	0	0	0	0	coding
FAM109A	1	13	13	0.923077	0.92	1.07918	1.08	12	12	0	0	0	1	0	0	0	3'utr
FAM110A	3	47	10	2.49048	0.83	2.07918	0.7	35	7	1	0	1	0	0	0	0	5'utr
FAM111A	1	8	8	1	1	0.90309	0.9	8	8	1	0	0	0	0	0	0	5'utr
FAM120A	1	11	11	0.909091	0.91	0.69897	0.7	6	6	0	0	1	0	0	0	0	coding
FAM120AOS	4	139	26	3.28754	0.81	4.21312	0.85	80	19.5	0	4	0	0	0	0	0	intron
FAM120B	1	9	9	1	1	0.954243	0.95	9	9	0	1	0	0	0	0	0	intron
FAM122B	2	20	10	1.54945	0.77	1.43136	0.72	20	10	2	0	0	0	0	0	0	5'utr
FAM133B	1	47	47	0.851064	0.85	1.60206	1.6	30	30	0	0	0	0	1	0	0	start_codon
FAM133DP	1	8	8	0.75	0.75	0.778151	0.78	8	8	0	0	0	0	0	0	0	processed_pseudogene
FAM134A	3	64	20	2.44286	0.8	2.90309	0.92	47	13	1	0	2	0	0	0	0	5'utr
FAM136A	1	19	19	0.842105	0.84	0.726999	0.73	18	18	0	0	0	0	1	0	0	start_codon
FAM13B	2	44	22	1.97059	0.99	2.51851	1.26	30	15	2	0	0	0	0	0	0	5'utr
FAM151B	1	62	62	0.274194	0.27	1.23045	1.23	16	16	0	1	0	0	0	0	0	intron
FAM156A	1	9	9	1	1	0.954243	0.95	9	9	1	0	0	0	0	0	0	5'utr
FAM160B1	1	18	18	0.777778	0.78	0.669007	0.67	16	16	1	0	0	0	0	0	0	5'utr
FAM160B2	1	9	9	0.888889	0.89	0.90309	0.9	9	9	0	0	0	0	1	0	0	start_codon
FAM162A	1	9	9	1	1	0.954243	0.95	8	8	0	0	0	0	1	0	0	start_codon
FAM168A	2	61	30	1.83736	0.92	2.58433	1.29	40	20	2	0	0	0	0	0	0	5'utr
FAM168B	15	280	15	12.5556	0.88	14.5574	0.88	247	15	1	2	0	11	0	0	0	3'utr
FAM169A	1	10	10	0.8	0.8	0.90309	0.9	9	9	0	1	0	0	0	0	0	intron
FAM172A	1	7	7	0.714286	0.71	0.69897	0.7	7	7	0	1	0	0	0	0	0	intron
FAM177A1	2	35	17	2	1	2.48287	1.24	22	11	0	1	0	0	1	0	0	intron
FAM189B	3	33	10	2.7	0.9	2.63548	0.9	29	9	3	0	0	0	0	0	0	5'utr
FAM192A	1	26	26	0.769231	0.77	1	1	25	25	0	0	0	0	0	0	0	5'utr-intron
FAM195A	1	7	7	0.857143	0.86	0.778151	0.78	6	6	1	0	0	0	0	0	0	5'utr
FAM199X	1	11	11	0.636364	0.64	0.845098	0.85	9	9	1	0	0	0	0	0	0	5'utr
FAM200B	1	11	11	0.727273	0.73	0.90309	0.9	9	9	1	0	0	0	0	0	0	5'utr
FAM206A	1	8	8	1	1	0.90309	0.9	7	7	0	0	0	0	1	0	0	start_codon
FAM208A	1	47	47	0.893617	0.89	1.32222	1.32	26	26	1	0	0	0	0	0	0	5'utr
FAM208B	4	137	28	3.37007	0.86	4.00139	1.06	93	23	4	0	0	0	0	0	0	5'utr
FAM20B	1	43	43	0.860465	0.86	0.79005	0.79	28	28	1	0	0	0	0	0	0	5'utr
FAM210A	3	68	26	2.27363	0.73	2.95999	0.9	56	24	3	0	0	0	0	0	0	5'utr
FAM214A	2	20	10	1.32967	0.66	1.30103	0.65	20	10	0	0	0	0	0	0	0	nonsense_mediated_decay
FAM219A	1	19	19	0.789474	0.79	0.69897	0.7	17	17	1	0	0	0	0	0	0	5'utr
FAM222B	1	7	7	1	1	0.845098	0.85	4	4	0	0	1	0	0	0	0	coding
FAM230B	2	20	10	1.625	0.81	1.77815	0.89	14	7	0	0	0	0	0	0	0	processed_transcript
FAM24B	1	26	26	0.961538	0.96	1.39794	1.4	18	18	1	0	0	0	0	0	0	5'utr
FAM35DP	2	124	62	1.89655	0.95	2.31806	1.16	40	20	0	0	0	0	0	0	0	unprocessed_pseudogene
FAM3A	1	13	13	0.615385	0.62	0.90309	0.9	12	12	0	0	0	0	0	0	0	5'utr-intron
FAM3C	1	11	11	0.909091	0.91	1	1	11	11	1	0	0	0	0	0	0	5'utr
FAM49B	1	148	148	0.831081	0.83	1.48785	1.49	86	86	1	0	0	0	0	0	0	5'utr
FAM53B	4	53	13	3.22318	0.86	3.70603	0.94	52	12.5	0	0	2	2	0	0	0	3'utr
FAM53C	1	8	8	0.875	0.88	0.845098	0.85	5	5	0	0	1	0	0	0	0	coding
FAM60A	1	23	23	0.869565	0.87	1.30103	1.3	20	20	1	0	0	0	0	0	0	5'utr
FAM63B	3	26	9	3	1	2.79934	0.95	23	7	0	0	3	0	0	0	0	coding
FAM72A	4	51	11	3.58766	0.91	3.78958	0.95	32	7.5	4	0	0	0	0	0	0	5'utr
FAM72B	1	7	7	1	1	0.845098	0.85	7	7	1	0	0	0	0	0	0	5'utr
FAM72C	1	12	12	1	1	1.07918	1.08	8	8	1	0	0	0	0	0	0	5'utr
FAM72D	5	110	17	4.16828	0.79	5.01747	0.94	97	15	5	0	0	0	0	0	0	5'utr
FAM76B	1	16	16	0.875	0.88	0.845098	0.85	7	7	1	0	0	0	0	0	0	5'utr
FAM78A	1	10	10	0.8	0.8	0.90309	0.9	8	8	0	0	0	1	0	0	0	3'utr
FAM83H	8	99	13	6.99576	0.91	7.32692	0.88	87	10.5	1	3	3	1	0	0	0	3'utr
FAM89B	3	109	37	2.43458	0.78	2.87064	0.98	80	24	0	0	2	0	1	0	0	start_codon
FAM91A1	1	11	11	0.818182	0.82	0.954243	0.95	8	8	1	0	0	0	0	0	0	5'utr
FAM96A	2	30	15	1.55	0.78	2.07555	1.04	25	12.5	1	0	0	0	1	0	0	start_codon
FAM96B	7	187	18	5.52361	0.75	6.44909	1	142	12	0	1	2	0	1	2	0	stop_codon
FANCG	1	24	24	0.875	0.88	0.845098	0.85	20	20	1	0	0	0	0	0	0	5'utr
FANCI	2	17	8	1.47143	0.74	1.5563	0.78	15	7.5	0	0	2	0	0	0	0	coding
FARSA	1	33	33	0.939394	0.94	1.19033	1.19	29	29	0	0	0	0	1	0	0	start_codon
FASN	1	11	11	0.818182	0.82	0.954243	0.95	6	6	0	0	0	1	0	0	0	3'utr
FAT1	2	15	7	1.73214	0.87	1.62325	0.81	15	7.5	0	0	1	1	0	0	0	3'utr
FAU	2	283	141	1.74434	0.87	1.84015	0.92	97	48.5	1	0	1	0	0	0	0	coding
FBL	2	68	34	1.48931	0.74	2.0304	1.02	64	32	0	0	1	0	0	0	0	coding
FBRS	10	175	14	8.31041	0.82	9.30967	0.9	133	10	4	0	4	1	1	0	0	5'utr
FBRSL1	7	111	14	6.22308	0.93	7.13983	0.95	85	11	2	3	2	0	0	0	0	5'utr
FBXL14	5	104	23	4.35304	0.91	5.42943	1.2	83	15	1	1	3	0	0	0	0	intron
FBXL15	1	7	7	1	1	0.845098	0.85	4	4	0	1	0	0	0	0	0	intron
FBXL17	1	7	7	0.714286	0.71	0.69897	0.7	6	6	1	0	0	0	0	0	0	5'utr
FBXL18	1	14	14	0.928571	0.93	1.11394	1.11	6	6	0	0	0	0	0	0	0	nonsense_mediated_decay
FBXL19	17	400	16	13.9271	0.81	15.2243	0.85	329	14	1	0	6	9	0	0	0	5'utr
FBXL20	1	10	10	0.9	0.9	0.954243	0.95	7	7	1	0	0	0	0	0	0	5'utr
FBXL3	2	64	32	1.66908	0.83	2.75891	1.38	51	25.5	2	0	0	0	0	0	0	5'utr
FBXL5	1	13	13	0.923077	0.92	1.07918	1.08	11	11	0	0	0	0	0	0	0	processed_transcript
FBXO30	1	10	10	1	1	1	1	9	9	1	0	0	0	0	0	0	5'utr
FBXO31	1	13	13	0.923077	0.92	0.778151	0.78	8	8	0	0	0	1	0	0	0	3'utr
FBXO33	4	38	9	3.78409	0.95	3.46835	0.85	32	7.5	0	0	4	0	0	0	0	coding
FBXO34	5	68	10	4.5402	0.9	4.29765	0.85	56	8	2	2	0	0	0	0	0	5'utr
FBXO41	7	104	11	5.97547	0.82	6.24869	0.9	90	11	3	0	3	0	1	0	0	coding
FBXO42	2	29	14	1.71905	0.86	1.88649	0.94	22	11	1	0	1	0	0	0	0	coding
FBXO45	2	65	32	1.87666	0.94	2.66652	1.33	36	18	2	0	0	0	0	0	0	5'utr
FBXO46	5	58	10	4.75714	1	4.57997	0.9	49	8	0	0	4	0	1	0	0	coding
FBXO5	2	28	14	1.77778	0.89	2.12385	1.06	16	8	0	1	0	0	1	0	0	start_codon
FBXO7	3	45	13	2.70022	0.92	2.91803	1.06	36	12	3	0	0	0	0	0	0	5'utr
FBXO8	2	15	7	2	1	1.74819	0.87	13	6.5	2	0	0	0	0	0	0	5'utr
FBXW2	2	64	32	1.85897	0.93	2.43056	1.22	45	22.5	0	0	0	1	0	0	0	3'utr
FBXW5	4	59	16	3.48175	0.87	4.00139	0.99	49	13.5	0	3	0	0	0	0	0	intron
FBXW7	5	133	23	4.07357	0.82	4.40749	0.76	112	17	5	0	0	0	0	0	0	5'utr
FCGBP	1	7	7	0.857143	0.86	0.778151	0.78	6	6	0	0	1	0	0	0	0	coding
FCHO2	1	24	24	0.75	0.75	0.778151	0.78	24	24	0	1	0	0	0	0	0	intron
FCHSD2	1	9	9	0.888889	0.89	0.90309	0.9	8	8	1	0	0	0	0	0	0	5'utr
FDFT1	2	56	28	1.87234	0.94	1.96497	0.98	40	20	0	0	1	0	1	0	0	start_codon
FDPS	1	24	24	0.666667	0.67	0.90309	0.9	23	23	1	0	0	0	0	0	0	5'utr
FDX1	3	69	19	2.68001	0.89	3.2887	1.13	43	14	1	0	1	0	1	0	0	5'utr
FDX1L	1	14	14	0.785714	0.79	0.740363	0.74	14	14	0	0	1	0	0	0	0	coding
FEM1A	7	108	11	6.10839	0.9	6.54869	0.9	85	8	0	0	2	4	1	0	0	start_codon
FEM1AP4	1	11	11	0.909091	0.91	0.69897	0.7	9	9	0	0	0	0	0	0	0	processed_pseudogene
FEM1B	6	233	34	5.37938	0.89	6.43508	1.07	190	30	6	0	0	0	0	0	0	5'utr
FEN1	2	44	22	1.67647	0.84	1.75967	0.88	32	16	2	0	0	0	0	0	0	5'utr
FERMT3	1	11	11	1	1	1.04139	1.04	11	11	0	0	1	0	0	0	0	coding
FGD5-AS1	5	93	15	3.90717	0.78	3.92428	0.78	77	15	0	0	0	0	0	0	0	antisense
FGFR1OP2	4	75	16	3.56349	0.9	4.01507	1.04	64	14.5	3	0	1	0	0	0	0	5'utr
FGFRL1	1	14	14	0.857143	0.86	0.778151	0.78	11	11	0	1	0	0	0	0	0	intron
FIP1L1	3	45	11	2.29616	0.73	2.43457	0.9	42	11	2	0	0	0	1	0	0	5'utr
FIS1	5	56	10	4.76667	1	4.62449	0.95	39	8	1	0	2	0	0	0	0	processed_transcript
FIZ1	6	76	11	5.31061	0.92	5.31785	0.9	68	10	0	0	5	1	0	0	0	3'utr
FKBP11	1	9	9	0.888889	0.89	0.90309	0.9	9	9	0	0	0	0	1	0	0	start_codon
FKBP1A	3	45	8	2.13929	0.71	2.30103	0.7	38	8	1	0	0	1	1	0	0	3'utr
FKBP2	1	8	8	0.875	0.88	0.845098	0.85	8	8	0	0	1	0	0	0	0	coding
FKBP4	2	19	9	1.71429	0.86	1.77815	0.89	17	8.5	0	0	0	1	1	0	0	start_codon
FKBP8	1	59	59	0.745763	0.75	0.865301	0.87	43	43	0	0	0	0	1	0	0	start_codon
FLCN	2	39	19	1.76339	0.88	2.24055	1.12	29	14.5	2	0	0	0	0	0	0	5'utr
FLI1	3	38	11	2.19156	0.73	2.17609	0.7	31	8	3	0	0	0	0	0	0	5'utr
FLJ31306	1	43	43	0.837209	0.84	1.5563	1.56	33	33	0	0	0	0	0	0	0	antisense
FLNA	10	128	9	9.12471	0.96	9.55	0.95	94	8	0	0	9	0	1	0	0	coding
FLNC	1	15	15	0.933333	0.93	1.14613	1.15	6	6	0	0	1	0	0	0	0	coding
FLOT1	2	35	17	1.7	0.85	2.03342	1.02	28	14	2	0	0	0	0	0	0	5'utr
FLOT2	1	17	17	0.823529	0.82	0.669007	0.67	15	15	1	0	0	0	0	0	0	5'utr
FLT1	2	56	28	1.59812	0.8	1.72245	0.86	45	22.5	2	0	0	0	0	0	0	5'utr
FLVCR1	2	22	11	1.92857	0.96	1.716	0.86	17	8.5	2	0	0	0	0	0	0	5'utr
FLYWCH1	2	43	21	1.82639	0.91	2.25527	1.13	39	19.5	1	0	0	1	0	0	0	5'utr
FLYWCH2	1	39	39	0.794872	0.79	0.889302	0.89	23	23	1	0	0	0	0	0	0	5'utr
FMNL1	4	175	30	3.65065	0.9	4.34021	1.09	95	17	2	0	0	2	0	0	0	5'utr
FMNL3	3	42	15	2.64048	0.86	2.67761	0.78	32	7	3	0	0	0	0	0	0	5'utr
FMR1	1	7	7	0.857143	0.86	0.778151	0.78	7	7	0	0	0	0	1	0	0	start_codon
FNBP1	3	73	10	2.24444	0.78	2.70243	0.78	60	9	2	0	0	0	1	0	0	start_codon
FOSL2	1	11	11	0.727273	0.73	0.60206	0.6	11	11	1	0	0	0	0	0	0	5'utr
FOXJ2	5	67	9	4.39664	0.89	4.50177	0.85	52	9	5	0	0	0	0	0	0	5'utr
FOXJ3	1	25	25	0.96	0.96	1.07918	1.08	24	24	1	0	0	0	0	0	0	5'utr
FOXK1	21	256	11	17.3792	0.85	18.0674	0.85	238	9	0	0	4	17	0	0	0	coding
FOXK2	5	119	9	4.36062	0.86	4.53511	0.9	71	9	1	0	1	3	0	0	0	5'utr
FOXM1	1	7	7	0.857143	0.86	0.778151	0.78	7	7	1	0	0	0	0	0	0	5'utr
FOXN3-AS1	1	7	7	1	1	0.845098	0.85	7	7	0	0	0	0	0	0	0	antisense
FOXO3	4	45	9	3.71242	0.94	4.00346	0.98	40	8.5	3	0	1	0	0	0	0	5'utr
FOXP1	1	11	11	1	1	1.04139	1.04	7	7	0	1	0	0	0	0	0	intron
FOXP4	1	16	16	0.875	0.88	0.669007	0.67	13	13	1	0	0	0	0	0	0	5'utr
FOXRED2	2	18	9	1.675	0.84	1.74819	0.87	14	7	2	0	0	0	0	0	0	5'utr
FP236383.10	1	29	29	0.448276	0.45	0.636822	0.64	15	15	0	0	0	0	0	0	0	miRNA
FRA10AC1	2	56	28	2	1	2.66276	1.33	38	19	1	0	0	0	0	0	0	5'utr-intron
FRAT1	1	14	14	0.785714	0.79	0.740363	0.74	12	12	1	0	0	0	0	0	0	5'utr
FRAT2	2	17	8	1.9	0.95	1.49831	0.75	16	8	1	0	1	0	0	0	0	coding
FRG1	1	26	26	0.884615	0.88	1.36173	1.36	24	24	1	0	0	0	0	0	0	5'utr
FRG1B	2	15	7	1.71429	0.86	1.60206	0.8	13	6.5	2	0	0	0	0	0	0	5'utr
FRMD5	1	23	23	0.826087	0.83	1.27875	1.28	18	18	0	1	0	0	0	0	0	intron
FRMD8	9	140	11	8.39394	1	9.15194	1	118	10	1	0	0	8	0	0	0	5'utr
FRS3	1	10	10	0.6	0.6	0.778151	0.78	8	8	1	0	0	0	0	0	0	5'utr
FSD1L	1	10	10	0.9	0.9	0.653213	0.65	10	10	1	0	0	0	0	0	0	5'utr
FTH1	1	214	214	0.873832	0.87	1.57287	1.57	86	86	0	0	0	0	0	0	0	5'utr-intron
FTH1P10	1	7	7	1	1	0.845098	0.85	2	2	0	0	0	0	0	0	0	processed_transcript
FTL	2	30	15	1.92857	0.96	2.31806	1.16	23	11.5	2	0	0	0	0	0	0	5'utr
FTSJ1	2	18	9	1.77778	0.89	1.50515	0.75	16	8	2	0	0	0	0	0	0	5'utr
FTSJ2	1	7	7	1	1	0.845098	0.85	7	7	0	0	1	0	0	0	0	coding
FTX	1	11	11	0.909091	0.91	0.69897	0.7	11	11	0	0	0	0	0	0	0	lincRNA_exon
FUBP3	1	42	42	0.738095	0.74	1.19033	1.19	25	25	0	0	0	0	1	0	0	start_codon
FURIN	1	13	13	0.923077	0.92	1.07918	1.08	13	13	0	0	0	1	0	0	0	3'utr
FUS	5	98	13	3.53593	0.75	4.34021	0.9	83	13	0	0	5	0	0	0	0	coding
FUT4	4	34	8	3.55	0.9	3.48058	0.87	31	7.5	0	0	3	1	0	0	0	coding
FUT8	1	13	13	0.615385	0.62	0.60206	0.6	10	10	0	1	0	0	0	0	0	intron
FUZ	1	13	13	0.923077	0.92	1.07918	1.08	7	7	0	0	1	0	0	0	0	coding
FXR2	2	15	7	1.46429	0.73	1.47712	0.74	12	6	0	0	1	0	1	0	0	coding
FXYD5	3	25	8	2.75	1	2.63548	0.9	21	7	3	0	0	0	0	0	0	5'utr
FYN	4	473	109	3.07429	0.76	3.64402	0.83	242	66.5	4	0	0	0	0	0	0	5'utr
FZD1	3	31	11	2.46953	0.85	2.43933	0.74	22	8	1	0	1	1	0	0	0	5'utr
FZD2	2	21	10	1.57143	0.79	1.74819	0.87	19	9.5	2	0	0	0	0	0	0	5'utr
FZR1	6	89	11	4.56061	0.79	5.10577	0.9	72	10	2	0	1	3	0	0	0	5'utr
G2E3	1	20	20	0.8	0.8	0.726999	0.73	16	16	1	0	0	0	0	0	0	5'utr
G3BP1	3	69	27	2.72282	0.87	3.35736	1.04	56	22	0	0	1	0	1	0	0	5'utr-intron
G3BP2	2	118	59	1.69815	0.85	2.2878	1.14	87	43.5	1	0	1	0	0	0	0	coding
G6PC3	1	10	10	0.9	0.9	0.653213	0.65	8	8	0	0	0	0	1	0	0	start_codon
GABARAP	3	39	11	2.65354	0.91	2.53148	0.93	30	9	1	0	0	0	1	0	0	coding-intron
GABARAPL1	1	23	23	0.782609	0.78	0.778151	0.78	17	17	0	0	0	0	0	0	0	intron-5'utr
GABPB1	5	63	8	4.44048	0.88	4.35885	0.85	57	8	3	2	0	0	0	0	0	intron
GADD45A	2	21	10	1.91667	0.96	1.69461	0.85	18	9	2	0	0	0	0	0	0	5'utr
GADD45GIP1	1	28	28	0.821429	0.82	0.884607	0.88	19	19	0	0	1	0	0	0	0	coding
GALNT11	2	24	12	1.83217	0.92	1.77815	0.89	17	8.5	2	0	0	0	0	0	0	5'utr
GAN	1	8	8	1	1	0.90309	0.9	7	7	0	0	0	0	1	0	0	start_codon
GAPDH	5	148	27	3.87578	0.78	5.41455	1.04	104	20	1	0	2	1	1	0	0	5'utr
GAPDHP1	1	20	20	0.65	0.65	0.812913	0.81	12	12	0	0	0	0	0	0	0	processed_pseudogene
GAPDHP65	1	25	25	0.92	0.92	1.0607	1.06	18	18	0	0	0	0	0	0	0	processed_pseudogene
GAPDHP70	1	10	10	0.6	0.6	0.778151	0.78	6	6	0	0	0	0	0	0	0	processed_pseudogene
GAR1	6	254	38	4.40815	0.77	7.31592	1.19	208	31.5	2	0	3	0	1	0	0	5'utr
GAREM	1	17	17	0.941176	0.94	1.20412	1.2	12	12	0	1	0	0	0	0	0	intron
GARS	2	32	16	1.86364	0.93	1.80163	0.9	28	14	0	0	1	0	1	0	0	start_codon
GAS2L1	4	53	12	3.64859	0.9	3.81954	1.02	45	12	1	0	2	0	1	0	0	5'utr
GAS7	3	53	19	2.67626	0.89	2.70243	0.9	44	14	2	0	1	0	0	0	0	coding
GATA3	3	85	18	2.60455	0.85	2.50937	0.88	48	16	3	0	0	0	0	0	0	5'utr
GATAD2A	7	135	12	5.78106	0.92	6.16543	0.9	107	12	2	2	0	3	0	0	0	5'utr
GATS	1	22	22	0.409091	0.41	0.653213	0.65	19	19	0	0	0	0	0	0	0	nonsense_mediated_decay
GATSL2	3	75	8	1.99762	0.71	2.49601	0.7	49	8	2	0	0	0	1	0	0	5'utr
GBA2	1	7	7	0.714286	0.71	0.69897	0.7	7	7	1	0	0	0	0	0	0	5'utr
GBP1	1	11	11	0.909091	0.91	1	1	11	11	1	0	0	0	0	0	0	5'utr
GBP2	1	25	25	0.96	0.96	1.38021	1.38	20	20	1	0	0	0	0	0	0	5'utr
GBP3	1	20	20	0.6	0.6	0.60206	0.6	18	18	1	0	0	0	0	0	0	5'utr
GCC1	4	66	15	3.38742	0.87	4.03822	1.03	49	13	4	0	0	0	0	0	0	5'utr
GCC2	1	7	7	0.714286	0.71	0.69897	0.7	6	6	1	0	0	0	0	0	0	5'utr
GCDH	1	12	12	1	1	1.07918	1.08	4	4	0	1	0	0	0	0	0	intron
GCH1	1	10	10	0.9	0.9	0.954243	0.95	8	8	1	0	0	0	0	0	0	5'utr
GCLC	2	43	21	1.80652	0.9	1.97081	0.99	29	14.5	2	0	0	0	0	0	0	5'utr
GCLM	3	96	26	2.39386	0.81	3.32077	1.19	74	25	2	0	0	0	1	0	0	start_codon
GCNT1	1	10	10	0.6	0.6	0.778151	0.78	10	10	1	0	0	0	0	0	0	5'utr
GDAP2	1	8	8	0.875	0.88	0.845098	0.85	7	7	1	0	0	0	0	0	0	5'utr
GDE1	2	74	37	1.74701	0.87	2.64444	1.32	41	20.5	1	0	0	0	1	0	0	start_codon
GDI1	1	20	20	0.7	0.7	0.669007	0.67	17	17	0	0	0	0	1	0	0	start_codon
GDI2	2	53	26	1.83007	0.92	2.10721	1.05	48	24	2	0	0	0	0	0	0	5'utr
GET4	2	28	14	2	1	2.20412	1.1	25	12.5	0	0	0	2	0	0	0	3'utr
GFM2	1	9	9	0.888889	0.89	0.60206	0.6	6	6	1	0	0	0	0	0	0	5'utr
GFOD1	9	288	14	7.83845	0.88	8.89873	0.99	219	12	5	0	3	1	0	0	0	3'utr
GFOD2	3	35	10	2.62222	0.9	2.61225	0.85	30	8	2	0	0	0	1	0	0	start_codon
GGNBP2	1	24	24	0.916667	0.92	1.34242	1.34	22	22	0	0	0	0	1	0	0	start_codon
GGPS1	1	15	15	0.866667	0.87	1.11394	1.11	14	14	1	0	0	0	0	0	0	5'utr
GHITM	1	32	32	0.96875	0.97	1.19033	1.19	19	19	0	0	0	0	1	0	0	start_codon
GID4	1	7	7	1	1	0.845098	0.85	5	5	0	0	1	0	0	0	0	coding
GID8	4	135	10	3.62218	0.9	3.96071	0.9	47	9.5	1	0	0	3	0	0	0	5'utr
GIGYF2	1	17	17	0.823529	0.82	0.845098	0.85	15	15	0	0	0	0	0	0	0	5'utr-intron
GIMAP6	1	11	11	0.818182	0.82	0.954243	0.95	8	8	1	0	0	0	0	0	0	5'utr
GIMAP7	1	14	14	0.714286	0.71	1	1	14	14	0	0	0	0	1	0	0	start_codon
GINS3	1	14	14	0.785714	0.79	1.04139	1.04	13	13	1	0	0	0	0	0	0	5'utr
GINS4	1	7	7	1	1	0.845098	0.85	7	7	1	0	0	0	0	0	0	5'utr
GIT1	3	100	28	2.48214	0.86	2.76042	0.85	75	15	1	0	0	1	1	0	0	3'utr
GJC1	1	19	19	0.789474	0.79	0.875061	0.88	18	18	1	0	0	0	0	0	0	5'utr
GLRX5	2	157	78	1.55217	0.78	2.08864	1.04	121	60.5	0	0	1	0	1	0	0	start_codon
GLS	4	130	22	2.82618	0.76	3.96318	0.98	92	17.5	2	0	1	0	1	0	0	5'utr
GLT8D1	6	92	11	4.96219	0.83	5.33621	0.89	71	9	5	0	0	0	0	0	0	5'utr
GLTP	1	10	10	0.777778	0.78	0.845098	0.85	7	7	1	0	0	0	0	0	0	5'utr
GLUD1	1	12	12	0.75	0.75	0.954243	0.95	12	12	0	0	1	0	0	0	0	coding
GLUD1P3	1	15	15	1	1	1.17609	1.18	13	13	0	0	0	0	0	0	0	processed_transcript
GLUL	1	16	16	0.875	0.88	1.14613	1.15	6	6	1	0	0	0	0	0	0	5'utr
GLYR1	1	9	9	0.777778	0.78	0.845098	0.85	9	9	0	0	0	0	1	0	0	start_codon
GMCL1	1	38	38	0.894737	0.89	1.05436	1.05	21	21	1	0	0	0	0	0	0	5'utr
GMEB2	1	7	7	1	1	0.845098	0.85	7	7	0	0	1	0	0	0	0	coding
GMFG	1	17	17	0.882353	0.88	1.17609	1.18	17	17	0	0	0	0	1	0	0	start_codon
GMNN	4	102	14	3.49278	0.85	3.81077	0.94	65	12	3	0	1	0	0	0	0	5'utr
GMPPA	1	16	16	1	1	1.20412	1.2	14	14	0	0	0	0	0	0	0	5'utr-intron
GMPPB	5	63	10	4.5233	0.9	4.73757	0.95	49	6	2	0	0	1	0	0	0	3'utr
GMPS	2	17	8	1.875	0.94	1.79934	0.9	14	7	2	0	0	0	0	0	0	5'utr
GNA12	4	70	14	3.60784	0.89	4.64345	1.12	56	13.5	1	0	1	2	0	0	0	3'utr
GNA13	2	50	25	1.87868	0.94	2.38021	1.19	35	17.5	1	0	0	0	1	0	0	start_codon
GNA15	9	163	12	7.40297	0.85	8.82319	0.9	120	12	3	0	0	5	1	0	0	5'utr
GNAI2	1	135	135	0.807407	0.81	1.19233	1.19	91	91	0	0	0	0	1	0	0	start_codon
GNAQ	2	57	28	1.51737	0.76	2.18752	1.09	47	23.5	2	0	0	0	0	0	0	5'utr
GNAS	10	601	19	7.23128	0.75	9.5077	0.99	394	16.5	3	5	0	0	1	0	0	intron
GNB1	1	81	81	0.91358	0.91	1.39211	1.39	52	52	1	0	0	0	0	0	0	5'utr
GNB1L	1	8	8	1	1	0.90309	0.9	8	8	1	0	0	0	0	0	0	5'utr
GNB2L1	2	103	51	1.73816	0.87	2.05994	1.03	76	38	0	0	1	0	1	0	0	coding
GNG2	1	65	65	0.876923	0.88	1.75587	1.76	52	52	1	0	0	0	0	0	0	5'utr
GNG4	3	35	13	2.46154	0.92	2.87852	0.95	25	9	3	0	0	0	0	0	0	5'utr
GNG5	3	107	33	2.48788	0.85	3.91649	1.41	70	24	1	0	1	0	1	0	0	coding
GNL1	3	194	24	2.35417	0.79	3.41863	1.28	110	19	1	0	1	0	1	0	0	coding
GNL2	1	23	23	1	1	1.36173	1.36	16	16	0	0	0	0	0	0	0	processed_transcript
GNPNAT1	2	33	16	1.76389	0.88	1.74819	0.87	30	15	2	0	0	0	0	0	0	5'utr
GOLGA2P7	1	13	13	1	1	1.11394	1.11	4	4	0	0	0	0	0	0	0	processed_transcript
GOLGA3	2	20	10	1.79167	0.9	1.58546	0.79	19	9.5	1	0	0	0	0	1	0	stop_codon
GOLGA4	1	10	10	0.8	0.8	0.60206	0.6	9	9	1	0	0	0	0	0	0	5'utr
GOLGA7B	1	18	18	0.611111	0.61	0.740363	0.74	8	8	0	0	0	1	0	0	0	3'utr
GOLPH3	4	48	9	3.49746	0.89	3.2465	0.81	43	8	3	0	1	0	0	0	0	coding
GOLPH3L	1	34	34	0.735294	0.74	1.09691	1.1	30	30	0	0	0	0	0	0	0	processed_transcript
GOLT1B	1	9	9	1	1	0.954243	0.95	7	7	1	0	0	0	0	0	0	5'utr
GOPC	2	45	22	1.68519	0.84	1.93576	0.97	37	18.5	2	0	0	0	0	0	0	5'utr
GORAB	1	7	7	1	1	0.845098	0.85	7	7	0	0	1	0	0	0	0	coding
GORASP2	2	39	19	1.93333	0.97	2.52634	1.26	26	13	1	0	1	0	0	0	0	5'utr
GOT2	1	9	9	1	1	0.954243	0.95	9	9	1	0	0	0	0	0	0	5'utr
GP1BB	6	104	16	5.29048	0.96	6.13958	1.11	84	13	1	1	3	1	0	0	0	5'utr
GPAA1	1	21	21	0.714286	0.71	1.17609	1.18	17	17	0	0	0	0	1	0	0	start_codon
GPANK1	1	7	7	0.857143	0.86	0.778151	0.78	7	7	0	0	1	0	0	0	0	coding
GPATCH2	1	7	7	0.857143	0.86	0.778151	0.78	7	7	0	0	0	0	1	0	0	start_codon
GPBP1	6	105	15	4.97851	0.84	5.5298	0.85	81	13.5	5	0	0	0	0	0	0	5'utr
GPBP1L1	5	78	18	3.76496	0.72	3.82071	0.75	77	17	5	0	0	0	0	0	0	5'utr
GPHN	2	18	9	1.66667	0.83	1.74819	0.87	17	8.5	2	0	0	0	0	0	0	5'utr
GPN2	5	71	11	4.72689	1	4.43303	0.9	55	9	2	0	2	0	1	0	0	coding
GPN3	1	10	10	1	1	1	1	5	5	0	0	0	0	0	0	0	coding-intron
GPR125	1	19	19	1	1	1.27875	1.28	12	12	1	0	0	0	0	0	0	5'utr
GPR137	7	109	12	5.94762	0.9	5.98951	0.86	95	11	3	2	2	0	0	0	0	5'utr
GPR153	1	7	7	0.857143	0.86	0.778151	0.78	7	7	0	0	1	0	0	0	0	coding
GPS2	1	19	19	0.789474	0.79	1.17609	1.18	17	17	1	0	0	0	0	0	0	5'utr
GPSM1	1	7	7	0.857143	0.86	0.778151	0.78	7	7	1	0	0	0	0	0	0	5'utr
GPSM3	3	33	12	2.67857	0.93	2.61225	0.85	23	7	1	0	1	0	1	0	0	coding
GPX1	2	45	22	1.75	0.88	1.68664	0.84	30	15	1	0	0	0	1	0	0	start_codon
GPX4	1	10	10	1	1	1	1	2	2	0	0	1	0	0	0	0	coding
GRAMD1A	1	17	17	0.705882	0.71	0.60206	0.6	15	15	1	0	0	0	0	0	0	5'utr
GRAMD1C	2	43	21	1.47312	0.74	2.30103	1.15	23	11.5	0	2	0	0	0	0	0	intron
GRAMD4	10	153	14	8.67537	0.86	9.68044	0.99	130	12	0	0	0	9	0	1	0	stop_codon
GRAP2	2	18	9	1.88889	0.94	1.85733	0.93	14	7	2	0	0	0	0	0	0	5'utr
GRB2	8	349	13	7.10315	0.89	7.89068	0.88	218	12	3	0	0	4	1	0	0	3'utr
GRHPR	1	7	7	0.857143	0.86	0.778151	0.78	6	6	0	0	0	0	1	0	0	start_codon
GRINA	2	17	8	2	1	1.8451	0.92	15	7.5	1	0	0	0	0	0	0	5'utr
GRK4	1	11	11	0.727273	0.73	0.60206	0.6	10	10	1	0	0	0	0	0	0	5'utr
GRK5	1	10	10	0.8	0.8	0.90309	0.9	10	10	1	0	0	0	0	0	0	5'utr
GRK6	3	21	7	2.42857	0.71	2.24304	0.7	20	7	1	1	1	0	0	0	0	5'utr
GRPEL2	1	57	57	0.912281	0.91	1.23888	1.24	30	30	0	0	1	0	0	0	0	coding
GRSF1	2	54	27	1.70256	0.85	2.32222	1.16	46	23	0	0	1	0	1	0	0	coding
GRWD1	1	12	12	0.833333	0.83	0.69897	0.7	10	10	0	0	0	1	0	0	0	3'utr
GSG2	1	32	32	0.96875	0.97	1.49136	1.49	9	9	0	0	1	0	0	0	0	coding
GSK3A	2	66	33	1.74244	0.87	2.58939	1.29	37	18.5	0	0	1	0	0	0	0	coding
GSK3B	4	78	12	3.37525	0.89	3.67025	0.95	59	11.5	4	0	0	0	0	0	0	5'utr
GSKIP	1	14	14	0.857143	0.86	1.07918	1.08	9	9	1	0	0	0	0	0	0	5'utr
GSPT1	4	193	14	3.19459	0.82	4.14264	0.95	144	13.5	0	3	1	0	0	0	0	intron
GSTO1	2	31	15	1.91667	0.96	2.32015	1.16	22	11	0	0	0	0	1	0	0	lincRNA_exon-lincRNA_intron
GSTP1	2	35	17	1.53333	0.77	1.94448	0.97	34	17	1	0	1	0	0	0	0	5'utr
GSTZ1	1	7	7	0.857143	0.86	0.778151	0.78	7	7	1	0	0	0	0	0	0	5'utr
GTF2A1	1	8	8	1	1	0.90309	0.9	5	5	1	0	0	0	0	0	0	5'utr
GTF2A2	1	73	73	0.849315	0.85	1.19033	1.19	55	55	1	0	0	0	0	0	0	5'utr
GTF2B	1	7	7	0.857143	0.86	0.778151	0.78	7	7	1	0	0	0	0	0	0	5'utr
GTF2E2	2	34	17	1.58824	0.79	1.65801	0.83	26	13	2	0	0	0	0	0	0	5'utr
GTF2F1	3	24	8	2.88889	1	2.65128	0.9	23	8	2	0	0	0	1	0	0	start_codon
GTF2F2	1	8	8	1	1	0.90309	0.9	8	8	1	0	0	0	0	0	0	5'utr
GTF2H2	1	9	9	1	1	0.954243	0.95	8	8	0	0	0	0	0	0	0	nonsense_mediated_decay
GTF2H2B	1	9	9	1	1	0.954243	0.95	4	4	0	0	0	0	0	0	0	processed_transcript
GTF2H4	1	11	11	0.818182	0.82	0.954243	0.95	11	11	0	0	0	1	0	0	0	3'utr
GTF2I	2	26	13	1.60131	0.8	1.99123	1	23	11.5	2	0	0	0	0	0	0	5'utr
GTF2IP1	2	62	31	1.74537	0.87	1.91514	0.96	44	22	0	0	0	0	0	0	0	processed_transcript
GTF3A	2	44	22	1.77474	0.89	2.57287	1.29	36	18	0	0	1	0	0	0	0	coding-intron
GTF3C4	4	86	16	3.38423	0.88	4.01907	1.02	52	10.5	3	0	1	0	0	0	0	5'utr
GTF3C5	1	14	14	0.714286	0.71	1	1	13	13	0	0	1	0	0	0	0	coding
GTF3C6	1	9	9	0.888889	0.89	0.60206	0.6	8	8	1	0	0	0	0	0	0	5'utr
GTPBP2	1	11	11	0.818182	0.82	0.653213	0.65	9	9	0	0	1	0	0	0	0	coding
GTPBP3	2	38	19	1.90323	0.95	1.99123	1	27	13.5	0	0	2	0	0	0	0	coding
GTPBP6	2	28	14	1.76471	0.88	1.85431	0.93	22	11	0	0	2	0	0	0	0	coding
GTSE1	4	49	11	3.61754	0.97	3.70723	0.87	41	9.5	0	2	0	2	0	0	0	intron
GUCA1B	2	16	8	1.5	0.75	1.54407	0.77	16	8	0	0	0	2	0	0	0	3'utr
GUCD1	1	16	16	1	1	1.20412	1.2	5	5	0	0	0	0	1	0	0	start_codon
GUF1	3	38	12	2.01144	0.71	2.25527	0.7	34	9	2	0	1	0	0	0	0	5'utr
GUK1	2	58	29	1.66708	0.83	2.13354	1.07	44	22	0	0	1	0	1	0	0	start_codon
GXYLT1	1	8	8	1	1	0.90309	0.9	7	7	0	0	0	0	1	0	0	start_codon
GXYLT2	1	52	52	0.403846	0.4	0.720159	0.72	35	35	0	1	0	0	0	0	0	intron
GYPC	2	25	12	1.92308	0.96	1.85733	0.93	20	10	2	0	0	0	0	0	0	5'utr
GZMA	1	23	23	0.695652	0.7	1.20412	1.2	23	23	0	0	0	0	1	0	0	start_codon
H1F0	3	61	17	2.13794	0.87	2.52827	0.88	39	12	2	0	0	1	0	0	0	5'utr
H1FX	12	1621	51	10.462	0.9	13.6889	1.19	787	30.5	2	0	4	5	1	0	0	3'utr
H2AFV	1	132	132	0.863636	0.86	1.35793	1.36	83	83	1	0	0	0	0	0	0	5'utr
H2AFX	10	615	17	8.92288	0.88	11.4321	1.21	433	13.5	0	0	2	7	1	0	0	3'utr
H2AFY	1	11	11	0.909091	0.91	1	1	11	11	0	0	1	0	0	0	0	coding
H2AFZ	1	127	127	0.811024	0.81	0.971445	0.97	102	102	1	0	0	0	0	0	0	5'utr
H2BFS	1	29	29	0.793103	0.79	1.36173	1.36	12	12	0	0	1	0	0	0	0	coding
H3F3A	2	46	23	1.73684	0.87	2.04922	1.02	31	15.5	0	0	0	0	1	0	0	5'utr-intron
H3F3AP6	2	24	12	2	1	2.13033	1.07	16	8	0	0	0	0	0	0	0	processed_pseudogene
H3F3B	3	205	28	2.47063	0.79	3.62026	1.34	119	20	1	0	1	0	0	1	0	stop_codon
H3F3C	3	103	41	2.51612	0.86	3.48572	1.23	55	15	1	0	1	0	1	0	0	coding
H6PD	1	18	18	0.722222	0.72	0.812913	0.81	17	17	1	0	0	0	0	0	0	5'utr
HABP4	1	8	8	0.875	0.88	0.845098	0.85	6	6	1	0	0	0	0	0	0	5'utr
HAR1A	3	63	18	2.78078	0.89	3.32469	0.9	29	11	0	0	0	0	0	0	0	lincRNA_exon
HAUS2	1	7	7	1	1	0.845098	0.85	7	7	0	0	1	0	0	0	0	coding
HAUS3	2	115	57	1.66667	0.83	2.36382	1.18	95	47.5	0	1	0	0	0	0	0	intron
HAUS4	3	103	24	2.36667	0.7	2.41719	0.74	71	18	2	0	0	0	0	0	0	5'utr-intron
HAUS6P3	1	7	7	1	1	0.845098	0.85	3	3	0	0	0	0	0	0	0	processed_pseudogene
HAX1	1	30	30	0.833333	0.83	1.09691	1.1	27	27	1	0	0	0	0	0	0	5'utr
HBP1	1	7	7	1	1	0.845098	0.85	5	5	1	0	0	0	0	0	0	5'utr
HBS1L	1	7	7	0.857143	0.86	0.778151	0.78	7	7	1	0	0	0	0	0	0	5'utr
HCCS	1	11	11	0.818182	0.82	0.954243	0.95	10	10	0	0	0	0	0	0	0	5'utr-intron
HCFC1	15	388	12	12.9114	0.88	15.0881	0.9	335	12	7	0	5	3	0	0	0	3'utr
HCFC1R1	1	9	9	0.888889	0.89	0.60206	0.6	7	7	1	0	0	0	0	0	0	5'utr
HCG18	1	20	20	1	1	1.30103	1.3	12	12	0	0	0	0	0	0	0	antisense
HCLS1	1	8	8	0.875	0.88	0.845098	0.85	8	8	1	0	0	0	0	0	0	5'utr
HDAC1	1	17	17	0.882353	0.88	1.17609	1.18	15	15	0	0	0	0	1	0	0	start_codon
HDAC2	2	201	100	1.57104	0.79	2.10231	1.05	129	64.5	2	0	0	0	0	0	0	5'utr
HDAC7	2	23	11	1.74603	0.87	1.38021	0.69	20	10	1	0	1	0	0	0	0	coding
HDDC2	2	30	15	1.66667	0.83	2.17609	1.09	19	9.5	0	0	1	0	0	0	0	coding
HDDC3	1	8	8	1	1	0.90309	0.9	5	5	0	0	0	0	0	0	0	coding-intron
HDGF	9	474	37	7.83087	0.86	9.62331	0.99	262	21	2	1	2	3	0	0	0	3'utr
HDGFRP3	4	69	10	3.32051	0.86	3.63548	0.89	58	10	3	0	0	0	1	0	0	start_codon
HDHD3	2	19	9	1.85714	0.93	1.85733	0.93	12	6	1	0	1	0	0	0	0	coding
HEATR2	2	18	9	1.9	0.95	1.5563	0.78	15	7.5	0	0	2	0	0	0	0	coding
HEBP2	1	126	126	0.865079	0.87	1.43537	1.44	87	87	1	0	0	0	0	0	0	5'utr
HECA	3	43	15	2.72083	0.92	3.0304	1.04	36	14	2	0	0	0	1	0	0	5'utr
HECTD1	3	28	10	2.7	0.9	2.76042	0.9	26	9	3	0	0	0	0	0	0	5'utr
HELZ2	2	19	9	1.83333	0.92	1.77815	0.89	12	6	0	0	2	0	0	0	0	coding
HERC4	1	11	11	0.727273	0.73	0.60206	0.6	11	11	1	0	0	0	0	0	0	5'utr
HERPUD2	2	22	11	1.81197	0.91	1.68124	0.84	16	8	2	0	0	0	0	0	0	5'utr
HES4	7	134	18	6.00029	0.89	6.17973	0.85	103	13	1	0	4	0	0	1	0	stop_codon
HEXA	1	8	8	1	1	0.90309	0.9	5	5	0	0	1	0	0	0	0	coding
HEXIM1	5	156	27	4.14265	0.86	5.36097	1.08	142	25	5	0	0	0	0	0	0	5'utr
HGH1	2	17	8	1.65714	0.83	1.38021	0.69	14	7	1	0	1	0	0	0	0	5'utr
HGNC:9982	2	20	10	1.78022	0.89	1.85733	0.93	10	5	0	0	0	1	0	0	0	3'utr
HHIP-AS1	1	24	24	0.791667	0.79	1.27875	1.28	19	19	0	0	0	0	0	0	0	antisense
HIATL1	3	82	26	2.8068	0.92	3.77291	1.28	53	16	3	0	0	0	0	0	0	5'utr
HIATL2	2	75	37	1.82143	0.91	2.49624	1.25	48	24	1	0	0	0	1	0	0	start_codon
HIC1	4	35	8	3.24116	0.81	3.04922	0.77	30	8	1	0	3	0	0	0	0	5'utr
HIF1A	2	28	14	1.88889	0.94	2.20412	1.1	26	13	2	0	0	0	0	0	0	5'utr
HIGD2A	1	25	25	0.92	0.92	1.36173	1.36	22	22	0	0	0	0	1	0	0	start_codon
HILPDA	1	8	8	1	1	0.90309	0.9	6	6	0	0	0	0	0	0	0	5'utr-intron
HINT1	2	184	92	1.78238	0.89	2.8478	1.42	85	42.5	1	0	1	0	0	0	0	coding
HINT2	1	18	18	0.944444	0.94	1.23045	1.23	13	13	0	0	0	0	1	0	0	start_codon
HIPK1	2	83	41	1.33973	0.67	1.81158	0.91	73	36.5	0	1	0	1	0	0	0	intron
HIPK3	1	8	8	0.625	0.63	0.69897	0.7	8	8	0	1	0	0	0	0	0	intron
HIRA	1	28	28	0.785714	0.79	1.34242	1.34	27	27	1	0	0	0	0	0	0	5'utr
HIRIP3	2	28	14	1.78974	0.89	2.19312	1.1	23	11.5	2	0	0	0	0	0	0	5'utr
HIST1H1B	7	325	14	5.73399	0.82	6.39559	0.85	214	13	0	0	5	0	1	1	0	stop_codon
HIST1H1C	5	243	21	4.20444	0.88	5.17699	1.02	185	19	0	0	4	0	1	0	0	coding
HIST1H1D	5	291	37	3.76369	0.73	4.80225	0.95	185	32	0	0	3	0	1	1	0	stop_codon
HIST1H1E	3	339	34	2.61917	0.86	3.65968	1.16	237	22	0	0	2	0	1	0	0	start_codon
HIST1H2AB	3	91	27	2.16077	0.75	3.15836	1.2	63	22	0	0	2	0	1	0	0	coding
HIST1H2AC	2	992	496	1.5972	0.8	2.62556	1.31	376	188	0	0	1	0	0	1	0	coding
HIST1H2AD	5	202	28	4.44321	0.89	5.75431	1.18	154	17	0	0	4	0	1	0	0	coding
HIST1H2AE	5	173	22	3.87181	0.75	5.72785	1	158	22	0	0	3	0	1	1	0	start_codon
HIST1H2AG	2	45	22	1.4527	0.73	1.89209	0.95	37	18.5	0	0	1	0	0	1	0	coding
HIST1H2AH	5	113	17	4.36544	0.85	5.29148	0.95	83	15	0	0	3	0	1	1	0	start_codon
HIST1H2AI	2	237	118	1.5031	0.75	1.72188	0.86	148	74	0	0	1	0	1	0	0	start_codon
HIST1H2AJ	3	183	31	2.60466	0.93	3.70195	1.16	98	26	0	0	2	0	1	0	0	coding
HIST1H2AK	2	21	10	1.67308	0.84	1.85733	0.93	17	8.5	0	0	1	0	0	1	0	stop_codon
HIST1H2AL	3	198	16	2.40042	0.82	3.22608	1.04	52	12	0	0	3	0	0	0	0	coding
HIST1H2AM	4	308	29	3.52941	0.86	4.858	1.24	102	23.5	0	0	3	0	1	0	0	coding
HIST1H2APS1	1	21	21	0.619048	0.62	1.11394	1.11	16	16	0	0	0	0	0	0	0	processed_pseudogene
HIST1H2BC	3	103	28	1.96218	0.68	2.36173	0.7	77	14	0	0	2	0	1	0	0	coding
HIST1H2BD	2	198	99	1.30434	0.65	2.11143	1.06	151	75.5	0	0	1	0	1	0	0	start_codon
HIST1H2BF	4	77	15	2.98509	0.71	3.64345	0.8	58	9.5	0	0	4	0	0	0	0	coding
HIST1H2BG	1	36	36	0.694444	0.69	1.39794	1.4	36	36	0	0	0	0	1	0	0	start_codon
HIST1H2BH	1	33	33	0.666667	0.67	0.740363	0.74	22	22	0	0	0	0	1	0	0	start_codon
HIST1H2BI	3	190	22	2.57792	0.82	3.21431	1.11	141	19	0	0	2	0	1	0	0	start_codon
HIST1H2BJ	4	221	29	3.03961	0.76	4.05843	1.04	164	24.5	0	0	3	0	1	0	0	coding
HIST1H2BK	2	120	60	1.78761	0.89	2.19243	1.1	87	43.5	0	0	1	0	1	0	0	coding
HIST1H2BL	2	29	14	1.48421	0.74	1.53991	0.77	24	12	0	0	1	0	1	0	0	coding
HIST1H2BM	1	14	14	0.714286	0.71	0.69897	0.7	13	13	0	0	0	0	1	0	0	start_codon
HIST1H2BN	2	59	29	1.00444	0.5	1.5721	0.79	52	26	0	0	1	0	1	0	0	start_codon
HIST1H2BO	3	105	14	2.12779	0.71	2.89579	0.9	83	10	0	0	2	0	1	0	0	start_codon
HIST1H2BPS3	2	25	12	1.83974	0.92	1.51851	0.76	14	7	0	0	0	0	0	0	0	processed_pseudogene
HIST1H3A	1	12	12	0.833333	0.83	0.69897	0.7	12	12	0	0	0	0	1	0	0	start_codon
HIST1H3B	2	342	171	1.85032	0.93	2.72754	1.36	184	92	0	0	1	0	0	1	0	stop_codon
HIST1H3C	2	36	18	1.42857	0.71	1.42597	0.71	31	15.5	0	0	2	0	0	0	0	coding
HIST1H3D	4	253	58	2.68106	0.71	3.59875	0.87	196	47	0	0	3	0	1	0	0	coding
HIST1H3E	1	11	11	0.818182	0.82	0.954243	0.95	7	7	0	0	1	0	0	0	0	coding
HIST1H3F	3	249	77	2.47663	0.84	3.42517	1.21	152	49	0	0	1	0	1	1	0	stop_codon
HIST1H3G	4	166	22	3.24958	0.81	4.09061	1.01	133	18.5	0	0	2	0	1	1	0	stop_codon
HIST1H3H	3	328	43	2.11444	0.73	2.54437	0.9	175	39	0	0	2	0	1	0	0	start_codon
HIST1H3I	2	157	78	1.51928	0.76	1.61805	0.81	97	48.5	0	0	1	0	1	0	0	coding
HIST1H3J	1	45	45	0.888889	0.89	1.60206	1.6	41	41	0	0	1	0	0	0	0	coding
HIST1H4A	3	462	16	2.5824	0.88	3.02271	1.11	240	14	0	0	2	0	1	0	0	start_codon
HIST1H4B	2	153	76	1.40891	0.7	1.50345	0.75	127	63.5	0	0	1	0	1	0	0	coding
HIST1H4C	3	108	36	2.48016	0.84	3.26834	0.95	83	33	0	0	1	0	1	1	0	start_codon
HIST1H4D	3	94	8	2.82278	1	2.95904	0.9	74	7	0	0	1	0	1	1	0	stop_codon
HIST1H4E	2	490	245	1.55168	0.78	2.25989	1.13	375	187.5	0	0	0	0	1	1	0	start_codon
HIST1H4F	3	271	105	2.42473	0.81	3.48633	1.17	194	59	0	0	1	0	1	1	0	start_codon
HIST1H4H	4	579	44	3.28262	0.81	4.42018	1.16	416	42	0	0	2	0	1	1	0	stop_codon
HIST1H4I	2	366	183	1.45655	0.73	1.85363	0.93	169	84.5	0	0	0	0	1	1	0	start_codon
HIST1H4J	2	472	236	1.61777	0.81	2.4589	1.23	263	131.5	0	0	1	0	1	0	0	start_codon
HIST1H4K	3	329	78	2.62564	0.92	2.81034	0.9	151	54	0	0	1	0	1	1	0	stop_codon
HIST1H4L	1	156	156	0.782051	0.78	0.831087	0.83	66	66	0	0	0	0	1	0	0	start_codon
HIST2H2AA4	10	637	50	8.2474	0.83	12.3622	1.3	283	24.5	1	0	7	0	1	1	0	coding
HIST2H2AB	3	74	24	2.63636	0.92	3.56773	1.34	60	16	0	0	2	0	1	0	0	coding
HIST2H2AC	3	144	53	2.47799	0.81	3.77711	1.08	111	43	0	0	3	0	0	0	0	coding
HIST2H2BE	5	243	58	4.07947	0.78	5.80835	1.2	183	31	0	1	1	1	1	0	0	intron-3'utr
HIST2H3A	3	938	320	2.3018	0.73	3.44507	1.21	417	127	0	0	1	0	1	1	0	start_codon
HIST2H3C	5	484	100	4.36674	0.87	5.44029	1.19	220	48	0	0	2	1	1	1	0	3'utr
HIST2H3D	3	67	21	2.64603	0.89	3.41363	1.26	42	15	0	0	2	0	1	0	0	coding
HIST2H3DP1	1	28	28	0.785714	0.79	0.643453	0.64	23	23	0	0	0	0	0	0	0	unprocessed_pseudogene
HIST2H4A	2	354	177	1.43089	0.72	2.40328	1.2	221	110.5	0	0	0	0	1	1	0	start_codon
HIST2H4B	3	226	40	2.41667	0.8	3.18752	1.04	139	31	0	0	1	0	1	1	0	stop_codon
HIST3H2A	5	115	21	3.79625	0.77	4.80099	0.95	94	17	0	0	4	0	1	0	0	coding
HIST3H2BB	2	41	20	1.51136	0.76	1.6902	0.85	37	18.5	0	0	1	0	1	0	0	start_codon
HIST3H3	1	16	16	0.75	0.75	0.60206	0.6	14	14	0	0	1	0	0	0	0	coding
HIST4H4	1	60	60	0.833333	0.83	0.853872	0.85	42	42	0	0	0	0	1	0	0	start_codon
HIVEP2	3	29	8	2.78571	1	2.78958	0.9	24	7	1	1	0	1	0	0	0	3'utr
HIVEP3	8	114	10	7.24659	0.92	7.7862	0.92	71	9.5	2	0	5	1	0	0	0	3'utr
HJURP	1	23	23	0.913043	0.91	1.02119	1.02	21	21	0	0	0	0	1	0	0	start_codon
HLA-A	5	65	11	3.51255	0.73	4.62572	1	49	10	0	0	4	0	1	0	0	start_codon
HLA-C	4	66	17	3.36944	0.87	4.07555	1.04	49	11.5	0	0	3	0	1	0	0	coding
HLA-E	2	35	17	1.69048	0.85	2.32015	1.16	26	13	0	0	1	0	0	0	0	coding-intron
HLA-H	1	30	30	0.866667	0.87	1.11394	1.11	11	11	0	0	0	0	0	0	0	unprocessed_pseudogene
HM13	1	14	14	1	1	1.14613	1.15	8	8	1	0	0	0	0	0	0	5'utr
HMCES	3	28	10	2.9	1	2.84073	0.95	26	9	2	1	0	0	0	0	0	5'utr
HMG20B	2	29	14	1.59804	0.8	1.81291	0.91	26	13	0	1	0	0	0	0	0	retained_intron
HMGA1	10	193	9	8.48141	0.86	9.08098	0.93	159	9	5	0	1	4	0	0	0	5'utr
HMGB1	3	114	27	2.24796	0.85	2.99646	0.94	43	17	2	0	1	0	0	0	0	coding
HMGB2	3	271	12	2.56349	0.9	3.19921	0.9	132	11	1	0	1	1	0	0	0	3'utr
HMGCR	1	13	13	1	1	1.11394	1.11	7	7	1	0	0	0	0	0	0	5'utr
HMGCS1	2	18	9	2	1	1.90849	0.95	17	8.5	0	1	0	1	0	0	0	3'utr
HMGN1	3	56	14	2.79798	0.91	3.52634	1.15	43	14	2	0	0	0	1	0	0	start_codon
HMGN2	3	297	27	2.27029	0.82	3.1754	0.95	136	14	0	0	0	0	1	0	0	processed_transcript
HMGN4	2	31	15	1.43434	0.72	1.38021	0.69	22	11	2	0	0	0	0	0	0	5'utr
HMGXB3	1	28	28	0.892857	0.89	0.920819	0.92	15	15	0	0	1	0	0	0	0	coding
HMGXB4	2	25	12	1.83333	0.92	1.72016	0.86	23	11.5	1	1	0	0	0	0	0	5'utr
HMHA1	7	92	13	5.81082	0.86	6.78409	0.9	80	12	1	0	4	2	0	0	0	5'utr
HMOX2	1	11	11	1	1	1.04139	1.04	10	10	0	0	0	0	0	0	0	5'utr-intron
HN1	1	64	64	0.90625	0.91	1.28631	1.29	58	58	0	0	0	0	1	0	0	start_codon
HNRNPA0	17	1157	30	14.3331	0.88	19.3181	1.06	558	24	2	0	10	4	1	0	0	3'utr
HNRNPA1	1	24	24	0.833333	0.83	1	1	13	13	1	0	0	0	0	0	0	5'utr
HNRNPA1P10	1	7	7	0.571429	0.57	0.60206	0.6	7	7	0	0	0	0	0	0	0	processed_pseudogene
HNRNPA1P12	1	7	7	1	1	0.845098	0.85	6	6	0	0	0	0	0	0	0	processed_pseudogene
HNRNPA2B1	11	374	18	9.74081	0.93	12.1927	1	297	17	1	0	5	1	1	0	0	3'utr
HNRNPA3	1	17	17	0.823529	0.82	0.845098	0.85	14	14	0	0	1	0	0	0	0	coding
HNRNPA3P13	1	8	8	0.5	0.5	0.60206	0.6	5	5	0	0	0	0	0	0	0	processed_pseudogene
HNRNPA3P6	1	14	14	0.857143	0.86	1.07918	1.08	13	13	0	0	0	0	0	0	0	processed_pseudogene
HNRNPAB	3	1158	116	2.63406	0.87	3.36686	1.19	367	67	1	0	0	1	1	0	0	5'utr
HNRNPC	2	106	53	1.45828	0.73	2.02119	1.01	72	36	1	0	0	0	1	0	0	start_codon
HNRNPD	6	321	34	4.37065	0.8	6.58316	1.18	227	28	2	0	3	0	0	0	0	coding
HNRNPDL	6	127	17	5.3726	0.9	6.47791	1.07	101	15	4	0	1	0	1	0	0	coding
HNRNPF	9	416	16	7.13531	0.8	8.42358	0.88	298	15	4	1	1	0	1	0	0	coding
HNRNPH1	6	242	10	4.92478	0.85	5.66604	0.97	168	10	1	0	1	1	1	0	0	3'utr
HNRNPH3	4	47	12	3.66667	0.96	3.79498	0.95	43	11.5	2	0	1	0	0	1	0	5'utr
HNRNPK	6	128	19	4.53291	0.76	5.81504	0.95	110	16	2	0	1	1	1	0	0	3'utr
HNRNPKP2	2	19	9	1.78409	0.89	1.8451	0.92	17	8.5	0	0	0	0	0	0	0	processed_pseudogene
HNRNPL	1	150	150	0.7	0.7	1.1181	1.12	99	99	0	0	1	0	0	0	0	coding
HNRNPM	2	45	22	1.21429	0.61	1.97772	0.99	37	18.5	0	0	1	0	1	0	0	start_codon
HNRNPR	2	183	91	1.71648	0.86	1.94751	0.97	44	22	1	0	1	0	0	0	0	coding
HNRNPU	6	138	20	5.00596	0.85	5.80155	0.91	104	15.5	2	0	2	1	1	0	0	3'utr
HNRNPUL1	7	101	13	5.68129	0.8	5.46398	0.74	78	12	2	0	2	1	0	0	0	5'utr
HNRNPUL2	4	95	19	3.11785	0.78	3.50515	0.75	82	18.5	1	0	2	1	0	0	0	3'utr
HNRNPUL2-BSCL2	3	34	9	1.9469	0.78	2.38917	0.85	28	9	0	0	0	0	1	0	0	nonsense_mediated_decay
HOMER1	6	280	27	4.80118	0.78	6.88882	1.19	207	20	6	0	0	0	0	0	0	5'utr
HOMER3	1	10	10	0.9	0.9	0.954243	0.95	10	10	0	0	0	1	0	0	0	3'utr
HOOK3	1	9	9	1	1	0.954243	0.95	8	8	1	0	0	0	0	0	0	5'utr
HP1BP3	1	8	8	1	1	0.90309	0.9	6	6	0	1	0	0	0	0	0	intron
HPCAL1	2	87	43	1.57776	0.79	1.95424	0.98	64	32	2	0	0	0	0	0	0	5'utr
HPS1	1	13	13	0.769231	0.77	1	1	11	11	1	0	0	0	0	0	0	5'utr
HPS4	1	9	9	0.888889	0.89	0.60206	0.6	9	9	0	0	0	1	0	0	0	3'utr
HPS6	3	30	10	2.60833	0.88	2.79934	0.95	27	9	0	0	3	0	0	0	0	coding
HS2ST1	1	135	135	0.785185	0.79	1.12222	1.12	112	112	1	0	0	0	0	0	0	5'utr
HSCB	1	7	7	1	1	0.845098	0.85	6	6	0	0	0	0	1	0	0	start_codon
HSD17B10	1	13	13	0.916667	0.92	0.740363	0.74	9	9	0	0	1	0	0	0	0	coding
HSD17B12	1	8	8	0.625	0.63	0.69897	0.7	7	7	0	0	1	0	0	0	0	coding
HSD17B4	1	9	9	1	1	0.954243	0.95	9	9	0	0	0	0	0	0	0	coding-intron
HSDL1	1	7	7	1	1	0.845098	0.85	7	7	1	0	0	0	0	0	0	5'utr
HSP90AA1	2	79	39	1.94286	0.97	2.47276	1.24	39	19.5	1	0	1	0	0	0	0	coding
HSP90AB1	5	167	8	3.86799	0.75	4.58249	0.85	141	8	1	0	3	0	0	0	0	5'utr
HSP90AB2P	2	20	10	1.2	0.6	1.5563	0.78	18	9	0	0	0	0	0	0	0	processed_transcript
HSP90AB3P	1	12	12	0.5	0.5	0.778151	0.78	10	10	0	0	0	0	0	0	0	processed_pseudogene
HSP90B1	4	181	19	3.07596	0.77	3.62402	0.94	133	17.5	0	0	0	0	1	1	0	start_codon
HSPA14	2	17	8	1.75	0.88	1.73239	0.87	10	5	1	1	0	0	0	0	0	5'utr
HSPA1A	1	9	9	0.444444	0.44	0.60206	0.6	5	5	1	0	0	0	0	0	0	5'utr
HSPA1B	1	7	7	0.857143	0.86	0.778151	0.78	7	7	1	0	0	0	0	0	0	5'utr
HSPA4	4	92	22	3.66676	0.9	4.38477	1.16	61	16	3	0	1	0	0	0	0	5'utr
HSPA5	4	327	23	3.33417	0.85	4.35149	1.02	228	19	2	0	1	0	1	0	0	coding
HSPA8	2	106	53	1.53391	0.77	2.1271	1.06	48	24	1	0	0	0	1	0	0	start_codon
HSPA9	1	13	13	0.846154	0.85	0.740363	0.74	11	11	0	0	0	0	1	0	0	start_codon
HSPB1	4	85	16	3.62184	0.89	3.97835	0.99	67	13.5	0	2	1	1	0	0	0	intron
HSPBP1	3	25	9	2.33333	0.89	2.35025	0.85	24	8	1	0	1	0	0	0	0	coding
HSPE1	2	76	38	1.76235	0.88	2.39358	1.2	63	31.5	1	0	0	0	1	0	0	5'utr
HSPH1	4	176	41	3.68465	0.92	4.68376	1.11	103	23.5	2	0	1	0	1	0	0	coding
HTATSF1	1	9	9	0.888889	0.89	0.90309	0.9	8	8	1	0	0	0	0	0	0	5'utr
HTRA2	2	20	10	1.75641	0.88	1.47712	0.74	15	7.5	2	0	0	0	0	0	0	5'utr
HUS1	1	16	16	1	1	1.20412	1.2	7	7	0	0	0	0	1	0	0	start_codon
HUWE1	2	28	14	1.45641	0.73	1.68124	0.84	22	11	1	0	1	0	0	0	0	coding
HYAL2	2	28	14	1.66667	0.83	1.51851	0.76	14	7	2	0	0	0	0	0	0	5'utr
HYOU1	1	11	11	0.909091	0.91	0.69897	0.7	11	11	1	0	0	0	0	0	0	5'utr
HYPK	1	8	8	0.875	0.88	0.845098	0.85	8	8	0	0	1	0	0	0	0	coding
ICA1L	1	7	7	0.571429	0.57	0.60206	0.6	6	6	0	0	0	1	0	0	0	3'utr
ICE2	1	25	25	0.52	0.52	0.812913	0.81	22	22	1	0	0	0	0	0	0	5'utr
ICK	2	29	14	1.68137	0.84	2.15534	1.08	14	7	2	0	0	0	0	0	0	5'utr
ICMT	3	118	20	2.68668	0.91	3.35793	1.08	77	18	0	0	2	0	1	0	0	coding
ID1	2	34	17	1.50714	0.75	1.716	0.86	32	16	1	0	0	0	1	0	0	5'utr
ID3	5	204	24	4.21264	0.85	5.47947	1.06	173	21	0	0	0	4	1	0	0	3'utr
IDH2	1	7	7	0.714286	0.71	0.69897	0.7	7	7	0	0	0	1	0	0	0	3'utr
IDH3B	1	12	12	0.916667	0.92	1.04139	1.04	10	10	0	0	1	0	0	0	0	coding
IDI1	5	59	10	4.31169	0.95	4.78161	0.9	50	9	0	0	4	0	1	0	0	coding
IER2	23	768	19	19.4416	0.85	21.7068	0.9	621	17	5	4	5	5	1	1	0	5'utr
IER3	7	400	43	5.86477	0.82	7.73976	1.27	315	21	0	0	2	4	1	0	0	3'utr
IER3IP1	2	26	13	1.58333	0.79	1.95424	0.98	19	9.5	1	0	1	0	0	0	0	coding
IER5	4	39	10	3.60227	0.89	3.45255	0.9	33	8	0	0	1	3	0	0	0	coding
IER5L	5	52	11	4.36763	0.86	4.37683	0.85	43	10	2	0	2	1	0	0	0	3'utr
IFFO2	1	10	10	1	1	1	1	7	7	1	0	0	0	0	0	0	5'utr
IFI16	2	36	18	1.67857	0.84	1.70472	0.85	34	17	2	0	0	0	0	0	0	5'utr
IFI27L1	1	8	8	0.875	0.88	0.845098	0.85	6	6	1	0	0	0	0	0	0	5'utr
IFI6	2	44	22	1.78235	0.89	1.95424	0.98	30	15	1	0	1	0	0	0	0	coding
IFIH1	2	19	9	1.71429	0.86	1.77815	0.89	19	9.5	2	0	0	0	0	0	0	5'utr
IFIT5	1	15	15	0.866667	0.87	1.11394	1.11	12	12	1	0	0	0	0	0	0	5'utr
IFITM1	1	8	8	0.75	0.75	0.778151	0.78	7	7	1	0	0	0	0	0	0	5'utr
IFNAR2	3	48	12	2.77381	0.92	3.32469	1.04	41	12	2	0	0	1	0	0	0	5'utr
IFNGR1	1	8	8	0.875	0.88	0.845098	0.85	7	7	1	0	0	0	0	0	0	5'utr
IFT22	1	7	7	0.857143	0.86	0.778151	0.78	7	7	1	0	0	0	0	0	0	5'utr
IFT27	2	25	12	1.81618	0.91	1.74819	0.87	23	11.5	2	0	0	0	0	0	0	5'utr
IGF2BP1	2	34	17	1.87857	0.94	2.09167	1.05	27	13.5	2	0	0	0	0	0	0	5'utr
IKBKAP	1	18	18	1	1	1.25527	1.26	15	15	1	0	0	0	0	0	0	5'utr
IKZF1	6	89	11	5.40578	0.89	6.04049	0.97	64	10	0	0	1	5	0	0	0	coding
IL10RB	1	17	17	0.823529	0.82	0.845098	0.85	17	17	0	0	0	0	1	0	0	start_codon
IL16	2	21	10	1.78571	0.89	1.58546	0.79	19	9.5	0	0	2	0	0	0	0	coding
IL17RA	4	42	10	3.36905	0.81	3.72263	0.95	36	9	0	0	4	0	0	0	0	coding
IL21R	5	103	15	4.00541	0.77	4.55194	0.74	94	13	4	0	1	0	0	0	0	5'utr
IL2RG	2	21	10	1.80556	0.9	1.34242	0.67	17	8.5	1	0	1	0	0	0	0	coding
IL4R	1	9	9	0.555556	0.56	0.69897	0.7	9	9	0	0	1	0	0	0	0	coding
IL6ST	2	27	13	1.75	0.88	1.81954	0.91	18	9	2	0	0	0	0	0	0	5'utr
ILF2	2	73	36	1.70566	0.85	2.2833	1.14	43	21.5	1	0	0	0	0	0	0	intron-5'utr
ILF3	7	248	9	6.16288	0.88	6.77513	0.9	180	8	2	1	2	2	0	0	0	5'utr
ILKAP	1	8	8	0.875	0.88	0.845098	0.85	8	8	1	0	0	0	0	0	0	5'utr
IMMP1L	1	10	10	1	1	1	1	8	8	1	0	0	0	0	0	0	5'utr
IMP3	2	30	15	1.29864	0.65	1.35218	0.68	22	11	0	0	1	0	1	0	0	coding
IMP4	1	17	17	0.823529	0.82	0.669007	0.67	6	6	0	0	1	0	0	0	0	coding
IMPA1	1	8	8	1	1	0.90309	0.9	7	7	1	0	0	0	0	0	0	5'utr
IMPAD1	3	118	29	2.37968	0.79	2.62001	0.86	86	20	2	0	1	0	0	0	0	coding
IMPDH2	1	11	11	0.909091	0.91	1	1	10	10	0	0	0	0	0	0	0	retained_intron
INAFM1	1	12	12	0.75	0.75	0.653213	0.65	12	12	1	0	0	0	0	0	0	5'utr
INCENP	1	7	7	1	1	0.845098	0.85	6	6	1	0	0	0	0	0	0	5'utr
ING1	7	409	10	5.59652	0.8	6.32809	0.85	251	10	5	0	2	0	0	0	0	5'utr
ING2	1	16	16	0.8125	0.81	1.11394	1.11	14	14	1	0	0	0	0	0	0	5'utr
ING5	5	79	11	4.50714	0.86	4.60189	0.9	59	10	0	2	0	3	0	0	0	intron
INO80E	4	67	10	3.58987	0.9	4.07482	0.98	49	8	0	0	2	1	1	0	0	start_codon
INPP4A	3	35	12	2.34231	0.75	1.95964	0.65	31	10	3	0	0	0	0	0	0	5'utr
INPP5E	3	54	18	2.41429	0.83	3.1651	1.11	45	14	3	0	0	0	0	0	0	5'utr
INPP5F	1	10	10	0.8	0.8	0.90309	0.9	6	6	1	0	0	0	0	0	0	5'utr
INSIG1	5	85	18	4.41954	0.88	4.93922	0.95	71	16	1	0	1	2	0	0	0	5'utr
INSIG2	1	8	8	0.75	0.75	0.778151	0.78	8	8	0	0	0	0	0	0	0	processed_transcript
INTS1	1	10	10	0.9	0.9	0.954243	0.95	9	9	0	0	1	0	0	0	0	coding
INTS10	1	12	12	1	1	1.07918	1.08	12	12	0	0	0	0	1	0	0	start_codon
INTS3	1	8	8	0.875	0.88	0.845098	0.85	8	8	1	0	0	0	0	0	0	5'utr
INTS5	2	29	14	1.73889	0.87	1.65642	0.83	25	12.5	0	0	1	0	1	0	0	coding
INTS6	2	19	9	1.47727	0.74	1.38021	0.69	16	8	1	0	0	0	1	0	0	start_codon
IP6K1	4	99	12	3.48355	0.88	4.08264	1.02	82	11	1	0	0	2	0	0	0	3'utr
IP6K2	2	51	25	1.72674	0.86	2.10037	1.05	45	22.5	0	0	0	0	2	0	0	start_codon
IPO13	4	40	10	3.34743	0.87	3.63548	0.93	36	9	4	0	0	0	0	0	0	5'utr
IQGAP1	1	11	11	0.909091	0.91	1	1	3	3	0	0	1	0	0	0	0	coding
IQSEC1	2	17	8	1.76389	0.88	1.74819	0.87	17	8.5	1	1	0	0	0	0	0	5'utr
IRAK1	4	109	19	3.18857	0.81	2.98312	0.76	88	13	1	0	1	0	1	0	0	coding
IRF1	8	373	21	6.8764	0.85	8.90246	1.01	236	18	1	0	0	7	0	0	0	3'utr
IRF2	2	23	11	1.74242	0.87	2	1	22	11	2	0	0	0	0	0	0	5'utr
IRF2BP1	6	129	15	5.3603	0.9	6.36221	1.04	105	11	4	0	2	0	0	0	0	coding
IRF2BP2	2	21	10	1.79808	0.9	1.92428	0.96	18	9	0	0	0	0	0	0	0	processed_transcript
IRF2BPL	12	227	12	10.8163	0.93	11.8258	0.93	169	9	4	0	7	0	0	1	0	stop_codon
IRF3	2	26	13	1.77381	0.89	1.81954	0.91	26	13	1	0	1	0	0	0	0	coding
IRF9	1	60	60	0.883333	0.88	1.12222	1.12	37	37	0	0	1	0	0	0	0	coding
IRGQ	1	8	8	1	1	0.90309	0.9	4	4	1	0	0	0	0	0	0	5'utr
IRS1	2	23	11	1.74603	0.87	1.68124	0.84	20	10	1	0	1	0	0	0	0	coding
IRS2	2	19	9	1.91667	0.96	1.88649	0.94	14	7	2	0	0	0	0	0	0	5'utr
IRX3	1	9	9	0.777778	0.78	0.845098	0.85	8	8	0	0	1	0	0	0	0	coding
ISCA2	1	11	11	1	1	1.04139	1.04	11	11	0	0	1	0	0	0	0	coding
ISCU	1	21	21	0.904762	0.9	1.27875	1.28	12	12	0	0	1	0	0	0	0	coding
ISG15	1	8	8	1	1	0.90309	0.9	7	7	0	0	1	0	0	0	0	coding
ISG20L2	2	73	36	1.70563	0.85	2.22531	1.11	49	24.5	2	0	0	0	0	0	0	5'utr
ISOC1	1	25	25	0.92	0.92	1.0607	1.06	15	15	0	0	1	0	0	0	0	coding
IST1	1	9	9	1	1	0.954243	0.95	8	8	1	0	0	0	0	0	0	5'utr
ISY1	1	12	12	0.75	0.75	0.954243	0.95	12	12	1	0	0	0	0	0	0	5'utr
ITCH	1	13	13	1	1	1.11394	1.11	9	9	1	0	0	0	0	0	0	5'utr
ITFG1	2	37	18	1.67836	0.84	2.07918	1.04	35	17.5	0	0	1	0	1	0	0	coding
ITGA4	1	7	7	1	1	0.845098	0.85	4	4	1	0	0	0	0	0	0	5'utr
ITGAE	1	12	12	0.916667	0.92	1.04139	1.04	7	7	0	0	0	0	0	0	0	intron-coding
ITGAV	1	13	13	1	1	1.11394	1.11	10	10	1	0	0	0	0	0	0	5'utr
ITGB1BP1	1	16	16	1	1	1.20412	1.2	12	12	1	0	0	0	0	0	0	5'utr
ITGB2	1	7	7	1	1	0.845098	0.85	7	7	0	0	0	0	0	0	0	coding-intron
ITK	2	27	13	1.75714	0.88	2.03342	1.02	25	12.5	0	0	1	1	0	0	0	coding
ITM2A	2	107	53	1.82431	0.91	3.24353	1.62	75	37.5	2	0	0	0	0	0	0	5'utr
ITM2B	2	150	75	1.88028	0.94	2.04576	1.02	72	36	1	0	1	0	0	0	0	5'utr
ITM2C	1	9	9	0.888889	0.89	0.90309	0.9	9	9	0	0	1	0	0	0	0	coding
ITPKB	11	196	18	9.31202	0.84	10.4573	0.85	156	16	5	0	6	0	0	0	0	coding
ITPRIP	1	7	7	0.571429	0.57	0.60206	0.6	6	6	0	0	0	1	0	0	0	3'utr
IVNS1ABP	2	36	18	1.775	0.89	2.10037	1.05	25	12.5	2	0	0	0	0	0	0	5'utr
JADE2	3	36	10	2.68421	1	2.65801	0.85	34	10	0	0	0	1	0	0	0	processed_transcript
JAGN1	1	8	8	0.875	0.88	0.845098	0.85	8	8	1	0	0	0	0	0	0	5'utr
JAK1	1	8	8	0.75	0.75	0.778151	0.78	8	8	1	0	0	0	0	0	0	5'utr
JAK2	2	23	11	1.78571	0.89	1.99564	1	17	8.5	1	1	0	0	0	0	0	5'utr
JARID2	5	48	8	4.1125	0.8	4.03262	0.85	46	8	0	0	5	0	0	0	0	coding
JKAMP	1	11	11	1	1	1.04139	1.04	9	9	0	1	0	0	0	0	0	intron
JMJD1C	1	7	7	0.714286	0.71	0.69897	0.7	7	7	1	0	0	0	0	0	0	5'utr
JMJD8	3	64	19	2.69059	0.85	2.65128	0.85	56	13	0	1	0	0	0	0	0	coding-intron
JMY	1	12	12	0.916667	0.92	1.04139	1.04	11	11	1	0	0	0	0	0	0	5'utr
JOSD1	5	203	30	4.14298	0.86	4.98184	0.95	144	24	3	0	0	0	0	0	0	5'utr
JTB	3	93	21	2.61905	0.83	3.39794	1.3	78	20	1	0	0	0	1	0	0	start_codon
JUN	2	20	10	2	1	1.95904	0.98	13	6.5	2	0	0	0	0	0	0	5'utr
JUNB	3	54	14	2.70899	0.86	3.25382	1.11	47	14	1	0	1	1	0	0	0	5'utr
JUND	11	1333	72	8.87735	0.84	13.2187	1.23	761	43	1	0	6	2	1	1	0	3'utr
KANK1	1	7	7	1	1	0.845098	0.85	7	7	0	1	0	0	0	0	0	intron
KANSL1	8	369	18	6.55088	0.81	7.80828	0.81	228	14.5	2	4	0	0	0	0	0	intron-coding
KANSL3	2	15	7	1.57143	0.79	1.44716	0.72	12	6	0	0	0	2	0	0	0	3'utr
KAT6A	4	51	9	3.43889	0.88	3.67247	0.87	42	7.5	2	0	1	1	0	0	0	3'utr
KAT8	1	9	9	0.777778	0.78	0.845098	0.85	9	9	0	0	0	0	1	0	0	start_codon
KATNA1	2	19	9	1.78889	0.89	1.5563	0.78	11	5.5	2	0	0	0	0	0	0	5'utr
KBTBD11	7	90	11	6.07483	0.88	6.74065	0.85	82	10	1	0	5	0	0	1	0	5'utr
KBTBD2	4	208	26	2.69453	0.66	3.87539	0.97	144	25	3	0	0	0	0	0	0	5'utr
KCMF1	2	53	26	1.58772	0.79	2.06695	1.03	25	12.5	2	0	0	0	0	0	0	5'utr
KCNA3	1	7	7	1	1	0.845098	0.85	7	7	1	0	0	0	0	0	0	5'utr
KCNAB2	7	73	10	6.4	1	6.43289	0.9	70	10	0	1	1	5	0	0	0	intron
KCNG3	3	27	9	2.88889	1	2.48855	0.85	21	8	2	0	1	0	0	0	0	coding
KCNJ14	2	16	8	2	1	1.79934	0.9	14	7	0	0	1	1	0	0	0	coding
KCNK1	2	35	17	1.72685	0.86	1.9058	0.95	33	16.5	0	0	1	0	1	0	0	start_codon
KCNK5	2	35	17	1.78333	0.89	2.37658	1.19	24	12	2	0	0	0	0	0	0	5'utr
KCNMB4	1	7	7	0.857143	0.86	0.778151	0.78	6	6	1	0	0	0	0	0	0	5'utr
KCTD13	3	81	12	2.86404	0.95	3.55194	1.08	62	11	0	0	0	0	0	0	0	nonsense_mediated_decay
KCTD14	1	10	10	1	1	1	1	7	7	1	0	0	0	0	0	0	5'utr
KCTD2	3	42	13	2.61538	1	2.88081	1	29	12	0	0	1	0	0	0	0	processed_transcript
KCTD20	3	26	7	2.63095	0.86	2.5977	0.78	24	7	1	0	0	2	0	0	0	5'utr
KCTD5	2	21	10	1.57143	0.79	1.44716	0.72	20	10	0	0	1	1	0	0	0	coding
KCTD9	1	21	21	0.857143	0.86	0.954243	0.95	21	21	1	0	0	0	0	0	0	5'utr
KDELR1	2	37	18	1.46296	0.73	2.11394	1.06	30	15	2	0	0	0	0	0	0	5'utr
KDM1A	1	15	15	0.933333	0.93	0.845098	0.85	11	11	1	0	0	0	0	0	0	5'utr
KDM2A	9	144	9	8.09462	0.93	8.42038	0.85	122	7	5	1	0	3	0	0	0	5'utr
KDM3B	5	118	25	4.09295	0.8	4.70472	1	97	22	2	0	2	0	1	0	0	5'utr
KDM4C	1	18	18	0.944444	0.94	0.929419	0.93	9	9	0	1	0	0	0	0	0	intron
KDM5A	2	43	21	1.72222	0.86	1.65801	0.83	26	13	1	0	0	0	1	0	0	start_codon
KDM5B	2	18	9	1.9	0.95	1.85733	0.93	15	7.5	1	1	0	0	0	0	0	intron
KDM5C	5	111	13	3.96259	0.77	4.29003	0.95	86	12	3	0	1	1	0	0	0	3'utr
KDM6B	11	138	13	9.59258	0.89	10.3545	0.9	120	10	2	0	7	1	1	0	0	5'utr
KDSR	1	8	8	0.875	0.88	0.845098	0.85	7	7	0	0	0	0	1	0	0	start_codon
KHDRBS1	4	96	16	3.4881	0.85	3.68325	0.96	76	14	2	0	1	0	1	0	0	5'utr
KHNYN	3	26	9	2.88889	1	2.44716	0.85	19	7	1	0	2	0	0	0	0	5'utr
KHSRP	5	311	12	3.47192	0.9	4.02366	0.65	190	11	1	0	1	2	1	0	0	3'utr
KIAA0101	2	21	10	1.52727	0.76	1.50515	0.75	20	10	1	0	0	0	1	0	0	start_codon
KIAA0195	1	7	7	0.571429	0.57	0.60206	0.6	7	7	1	0	0	0	0	0	0	5'utr
KIAA0226	1	12	12	0.75	0.75	0.653213	0.65	12	12	0	0	0	0	1	0	0	start_codon
KIAA0247	2	40	20	1.66667	0.83	2.00647	1	28	14	1	0	0	0	0	0	0	5'utr
KIAA0513	2	17	8	1.88889	0.94	1.50515	0.75	14	7	2	0	0	0	0	0	0	5'utr
KIAA0895	1	8	8	0.75	0.75	0.778151	0.78	8	8	1	0	0	0	0	0	0	5'utr
KIAA0930	1	8	8	1	1	0.90309	0.9	7	7	0	0	0	0	1	0	0	start_codon
KIAA1524	1	9	9	1	1	0.954243	0.95	3	3	0	0	0	0	1	0	0	start_codon
KIAA1551	1	8	8	0.875	0.88	0.845098	0.85	8	8	1	0	0	0	0	0	0	5'utr
KIAA1586	1	10	10	0.8	0.8	0.90309	0.9	8	8	1	0	0	0	0	0	0	5'utr
KIAA1715	2	23	11	1.9	0.95	2.06819	1.03	17	8.5	2	0	0	0	0	0	0	5'utr
KIAA1919	2	36	18	1.625	0.81	1.54407	0.77	29	14.5	2	0	0	0	0	0	0	5'utr
KIAA1958	1	8	8	1	1	0.90309	0.9	8	8	1	0	0	0	0	0	0	5'utr
KIAA2013	4	150	32	3.44082	0.88	4.24045	1.1	118	28	0	0	3	0	0	0	0	coding
KIAA2018	1	21	21	1	1	1.32222	1.32	15	15	1	0	0	0	0	0	0	5'utr
KIF11	1	9	9	0.888889	0.89	0.90309	0.9	6	6	1	0	0	0	0	0	0	5'utr
KIF18B	1	10	10	0.9	0.9	0.954243	0.95	9	9	0	0	1	0	0	0	0	coding
KIF21B	5	45	8	4.63889	1	4.21654	0.85	35	7	0	0	0	5	0	0	0	3'utr
KIF22	1	9	9	0.888889	0.89	0.90309	0.9	8	8	0	0	1	0	0	0	0	coding
KIF23	1	15	15	0.866667	0.87	1.11394	1.11	13	13	1	0	0	0	0	0	0	5'utr
KIF2C	3	32	9	2.59524	0.89	2.86213	0.9	28	9	1	0	0	1	1	0	0	5'utr
KIF3C	2	16	8	1.75	0.88	1.6902	0.85	13	6.5	2	0	0	0	0	0	0	5'utr
KIF5B	3	63	20	2.81989	0.92	3.31246	1.04	40	10	3	0	0	0	0	0	0	5'utr
KIFC1	1	46	46	0.869565	0.87	1.12494	1.12	40	40	1	0	0	0	0	0	0	5'utr
KLC1	2	76	38	1.89552	0.95	2.03342	1.02	53	26.5	2	0	0	0	0	0	0	5'utr
KLF13	12	189	13	10.2064	0.84	11.5464	0.95	155	10.5	4	0	2	6	0	0	0	5'utr
KLF16	8	124	14	7.03136	0.9	7.35262	0.94	107	11.5	1	0	0	6	1	0	0	3'utr
KLF6	1	20	20	0.85	0.85	1.23045	1.23	19	19	1	0	0	0	0	0	0	5'utr
KLHDC10	1	9	9	0.888889	0.89	0.60206	0.6	8	8	0	0	0	0	1	0	0	start_codon
KLHDC3	2	22	11	1.86667	0.93	1.65801	0.83	17	8.5	1	0	1	0	0	0	0	5'utr
KLHDC4	2	15	7	1.73214	0.87	1.62325	0.81	14	7	0	0	1	0	0	0	0	nonsense_mediated_decay
KLHL12	1	8	8	0.75	0.75	0.778151	0.78	8	8	1	0	0	0	0	0	0	5'utr
KLHL15	2	23	11	1.72727	0.86	1.68124	0.84	21	10.5	0	1	0	0	0	0	0	intron-5'utr
KLHL18	2	17	8	1.875	0.94	1.79934	0.9	15	7.5	0	0	0	1	1	0	0	start_codon
KLHL20	1	22	22	0.772727	0.77	0.929419	0.93	21	21	1	0	0	0	0	0	0	5'utr
KLHL21	2	17	8	1.9	0.95	1.79934	0.9	14	7	0	0	2	0	0	0	0	coding
KLHL36	2	34	17	1.63492	0.82	1.62325	0.81	28	14	1	0	1	0	0	0	0	5'utr
KLHL42	2	18	9	1.77778	0.89	1.50515	0.75	13	6.5	1	0	1	0	0	0	0	5'utr
KMT2A	1	7	7	0.714286	0.71	0.69897	0.7	6	6	0	0	1	0	0	0	0	coding
KMT2B	2	39	19	1.45161	0.73	1.74819	0.87	31	15.5	0	0	1	0	1	0	0	start_codon
KMT2C	1	10	10	0.9	0.9	0.653213	0.65	9	9	1	0	0	0	0	0	0	5'utr
KMT2D	100	2194	15	85.6935	0.86	98.8259	0.98	1856	13.5	0	1	78	18	1	1	0	3'utr
KMT2E	2	74	37	1.52821	0.76	2.04922	1.02	62	31	2	0	0	0	0	0	0	5'utr
KNSTRN	1	14	14	0.928571	0.93	1.11394	1.11	12	12	0	0	1	0	0	0	0	coding
KPNA2	2	100	50	1.44518	0.72	2.19103	1.1	89	44.5	1	0	0	0	1	0	0	5'utr
KPNA4	4	149	29	3.5867	0.91	4.07809	1.05	102	25.5	2	0	1	0	1	0	0	coding
[truncated: 2,891 more rows]

## Sheet: APB_REP1
GeneName	Sites	ReadCountSum	ReadCountMed	T2CFractionSum	T2CFractionMed	ConversionSpecificitySum	ConversionSpecificityMed	UniqueReadsSum	UniqueReadsMed	5'utr	Intron	Exon	3'utr	Start_codon	Stop_codon	Junction	GeneType
A1BG	1	9	9	0.875	0.88	0.845098	0.85	8	8	0	0	1	0	0	0	0	coding
A2MP1	2	19	9	2	1	1.95424	0.98	14	7	0	0	0	0	0	0	0	transcribed_unprocessed_pseudogene
AAAS	1	9	9	0.888889	0.89	0.90309	0.9	9	9	1	0	0	0	0	0	0	5'utr
AAMP	1	8	8	0.75	0.75	0.778151	0.78	8	8	0	0	0	1	0	0	0	3'utr
AARS	1	7	7	0.857143	0.86	0.778151	0.78	5	5	0	0	1	0	0	0	0	coding
AATF	3	142	8	2.78051	0.91	3.44986	0.85	63	8	2	0	0	0	1	0	0	5'utr
ABCC1	1	10	10	0.9	0.9	0.954243	0.95	5	5	1	0	0	0	0	0	0	5'utr
ABCF2	1	8	8	0.875	0.88	0.845098	0.85	7	7	0	1	0	0	0	0	0	intron
ABHD13	1	9	9	0.888889	0.89	0.60206	0.6	8	8	1	0	0	0	0	0	0	5'utr
ABHD15	2	16	8	1.74603	0.87	1.68124	0.84	16	8	0	0	2	0	0	0	0	coding
ABHD17A	2	73	36	1.52058	0.76	2.04922	1.02	19	9.5	2	0	0	0	0	0	0	5'utr
ABHD17AP3	1	8	8	1	1	0.90309	0.9	4	4	0	0	0	0	0	0	0	unprocessed_pseudogene
ABHD17AP6	3	46	16	2.60417	0.94	3.33445	1.08	28	8	0	0	0	0	0	0	0	unprocessed_pseudogene
ABHD17B	3	70	21	2.92607	0.97	3.60959	1.27	49	16	3	0	0	0	0	0	0	5'utr
ABHD5	1	7	7	0.857143	0.86	0.778151	0.78	7	7	0	0	0	0	1	0	0	start_codon
ABHD8	2	45	22	1.80451	0.9	2.33445	1.17	30	15	1	0	0	1	0	0	0	3'utr
ABL1	7	103	13	6.07557	0.92	6.31349	0.88	93	13	1	0	0	6	0	0	0	5'utr
ABRACL	1	147	147	0.979592	0.98	2.15836	2.16	29	29	1	0	0	0	0	0	0	5'utr
AC004980.7	1	50	50	0.84	0.84	1.62325	1.62	25	25	0	0	0	0	0	0	0	processed_transcript
AC007040.8	1	136	136	0.433824	0.43	0.770852	0.77	46	46	0	0	0	0	0	0	0	antisense
AC009005.2	1	7	7	1	1	0.845098	0.85	6	6	0	0	0	0	0	0	0	antisense
AC011893.3	1	15	15	0.866667	0.87	1.11394	1.11	14	14	0	0	0	0	0	0	0	antisense
AC018890.6	1	7	7	1	1	0.845098	0.85	6	6	0	0	0	0	0	0	0	antisense
AC073046.25	1	7	7	0.714286	0.71	0.69897	0.7	6	6	0	0	0	0	0	0	0	lincRNA_intron
AC073957.15	1	17	17	0.941176	0.94	1.20412	1.2	17	17	0	0	0	0	0	0	0	antisense
AC090587.4	2	29	14	1.86364	0.93	1.82282	0.91	23	11.5	0	0	0	0	0	0	0	sense_overlapping
AC091729.9	1	37	37	0.972973	0.97	1.5563	1.56	11	11	0	0	0	0	0	0	0	antisense
AC093323.3	1	18	18	0.888889	0.89	1.20412	1.2	16	16	0	0	0	0	0	0	0	lincRNA_exon
AC093838.4	2	14	7	2	1	1.6902	0.85	14	7	0	0	0	0	0	0	0	processed_transcript
AC113189.5	3	41	16	2.875	1	2.94547	0.85	32	11	0	0	0	0	0	0	0	antisense
AC135048.13	1	8	8	0.625	0.63	0.69897	0.7	8	8	0	0	0	0	0	0	0	processed_transcript
AC141586.5	1	8	8	0.75	0.75	0.778151	0.78	6	6	0	0	0	0	0	0	0	processed_transcript
AC145110.1	1	7	7	1	1	0.845098	0.85	3	3	0	0	0	0	0	0	0	lincRNA_intron
ACADVL	1	12	12	1	1	1.07918	1.08	9	9	0	0	1	0	0	0	0	coding
ACEA_U3	8	623	79	6.54848	0.84	9.18697	1.15	269	33	0	0	0	0	0	0	0	snoRNA
ACIN1	2	42	21	1.49199	0.75	2.06258	1.03	33	16.5	0	0	0	1	1	0	0	3'utr
ACLY	1	8	8	0.875	0.88	0.845098	0.85	6	6	1	0	0	0	0	0	0	5'utr
ACOT7	1	15	15	0.933333	0.93	1.14613	1.15	14	14	1	0	0	0	0	0	0	5'utr
ACOX1	1	11	11	0.909091	0.91	1	1	6	6	1	0	0	0	0	0	0	5'utr
ACSF3	12	130	11	10.5064	0.88	10.761	0.85	115	8.5	0	7	1	3	0	1	0	intron
ACSL3	1	8	8	0.875	0.88	0.845098	0.85	6	6	1	0	0	0	0	0	0	5'utr
ACTB	10	475	10	8.35074	0.88	10.7575	0.9	226	10	1	0	5	2	1	1	0	3'utr
ACTG1	7	378	10	5.97583	0.91	6.33854	0.9	152	7	1	0	1	1	0	1	0	intron-3'utr
ACTL6A	1	18	18	1	1	1.25527	1.26	14	14	0	0	0	0	0	0	0	5'utr-intron
ACTN4	1	13	13	0.692308	0.69	0.954243	0.95	11	11	0	0	0	0	0	0	0	retained_intron
ACTR2	1	29	29	0.931034	0.93	1.13033	1.13	26	26	0	0	0	0	1	0	0	start_codon
ACTR3	4	63	12	3.57131	0.9	3.73719	0.83	45	10	3	0	0	0	0	0	0	5'utr
ADAM10	1	10	10	0.9	0.9	0.954243	0.95	10	10	1	0	0	0	0	0	0	5'utr
ADAR	24	392	9	21.3356	0.89	23.6522	0.93	280	8	2	0	8	13	1	0	0	3'utr
ADARB1	1	16	16	0.8125	0.81	0.636822	0.64	7	7	1	0	0	0	0	0	0	5'utr
ADAT1	1	9	9	1	1	0.954243	0.95	2	2	0	0	1	0	0	0	0	coding
ADAT3	3	32	9	2.69722	0.89	2.89432	0.9	28	9	0	0	2	1	0	0	0	coding
ADCK2	1	8	8	0.875	0.88	0.845098	0.85	8	8	0	0	0	0	1	0	0	start_codon
ADCYAP1	1	7	7	1	1	0.845098	0.85	6	6	0	1	0	0	0	0	0	intron
ADIPOR1	1	20	20	0.85	0.85	0.929419	0.93	12	12	1	0	0	0	0	0	0	5'utr
ADIPOR2	2	17	8	1.9	0.95	1.79934	0.9	14	7	0	0	0	1	0	0	0	processed_transcript
ADNP	1	18	18	0.944444	0.94	1.23045	1.23	16	16	1	0	0	0	0	0	0	5'utr
ADO	2	46	23	1.91667	0.96	2.21748	1.11	32	16	2	0	0	0	0	0	0	5'utr
ADORA2B	1	18	18	0.777778	0.78	1.14613	1.15	18	18	1	0	0	0	0	0	0	5'utr
ADPGK	1	8	8	0.875	0.88	0.845098	0.85	8	8	0	0	1	0	0	0	0	coding
ADPRHL2	1	13	13	0.923077	0.92	1.07918	1.08	13	13	0	0	0	1	0	0	0	3'utr
ADRBK1	2	17	8	1.8	0.9	1.74819	0.87	15	7.5	0	0	0	1	1	0	0	start_codon
ADRBK2	7	75	10	5.8108	0.86	6.21981	0.9	65	10	1	0	2	4	0	0	0	5'utr
AEN	4	38	9	3.58333	0.88	3.6902	0.92	32	7.5	0	1	1	2	0	0	0	intron
AES	4	65	16	3.37778	0.85	4.03262	1.09	51	13	1	0	0	3	0	0	0	3'utr
AFF2	1	19	19	0.736842	0.74	0.845098	0.85	17	17	1	0	0	0	0	0	0	5'utr
AFF4	2	17	8	1.9	0.95	1.49831	0.75	13	6.5	2	0	0	0	0	0	0	5'utr
AFTPH	1	8	8	0.875	0.88	0.845098	0.85	8	8	0	0	1	0	0	0	0	coding
AGAP1	1	8	8	1	1	0.90309	0.9	5	5	0	1	0	0	0	0	0	intron
AGAP2	5	61	11	4.39539	0.88	4.14053	0.85	54	10	0	0	1	4	0	0	0	3'utr
AGFG1	1	50	50	0.96	0.96	1.68124	1.68	19	19	1	0	0	0	0	0	0	5'utr
AGGF1	2	26	13	1.77576	0.89	1.81291	0.91	25	12.5	2	0	0	0	0	0	0	5'utr
AGO2	2	35	17	1.7735	0.89	1.96379	0.98	29	14.5	1	0	0	1	0	0	0	3'utr
AGO3	1	10	10	0.9	0.9	0.653213	0.65	7	7	1	0	0	0	0	0	0	5'utr
AGPAT1	1	8	8	0.875	0.88	0.845098	0.85	7	7	1	0	0	0	0	0	0	5'utr
AGPAT6	4	56	8	3.38839	0.82	3.30643	0.79	49	7.5	2	0	1	1	0	0	0	5'utr
AHCYL1	1	17	17	0.941176	0.94	1.20412	1.2	16	16	1	0	0	0	0	0	0	5'utr
AHDC1	6	56	9	5.45332	0.9	4.88748	0.85	43	7	0	0	5	0	0	0	0	coding
AHSA1	2	14	7	1.71429	0.86	1.5563	0.78	12	6	2	0	0	0	0	0	0	5'utr
AIF1	1	14	14	1	1	1.14613	1.15	13	13	1	0	0	0	0	0	0	5'utr
AIFM3	1	8	8	0.5	0.5	0.60206	0.6	7	7	0	1	0	0	0	0	0	intron
AIMP2	1	13	13	1	1	1.11394	1.11	6	6	1	0	0	0	0	0	0	5'utr
AIP	1	9	9	1	1	0.954243	0.95	9	9	0	0	1	0	0	0	0	coding
AJ003147.9	1	97	97	0.71134	0.71	1.36173	1.36	20	20	0	0	0	0	0	0	0	antisense
AKAP2	1	7	7	1	1	0.845098	0.85	7	7	0	0	0	0	1	0	0	start_codon
AKIRIN1	2	27	13	1.94444	0.97	2.18469	1.09	24	12	0	0	0	1	1	0	0	start_codon
AKIRIN2	4	180	37	3.37927	0.85	4.83969	1.21	121	27	4	0	0	0	0	0	0	5'utr
AKNA	2	21	10	1.75	0.88	1.89209	0.95	15	7.5	1	0	1	0	0	0	0	coding
AKR1A1	2	57	28	1.97368	0.99	2.84696	1.42	31	15.5	1	0	0	0	0	0	0	5'utr-intron
AKR1B1	1	9	9	1	1	0.954243	0.95	8	8	1	0	0	0	0	0	0	5'utr
AKR7A2	1	7	7	0.714286	0.71	0.69897	0.7	5	5	0	0	1	0	0	0	0	coding
AKT2	5	71	10	4.54201	0.86	4.88773	1	57	8	0	0	0	5	0	0	0	3'utr
ALAS1	2	25	12	1.6859	0.84	1.74036	0.87	22	11	2	0	0	0	0	0	0	5'utr
ALDH18A1	1	12	12	0.916667	0.92	1.04139	1.04	11	11	1	0	0	0	0	0	0	5'utr
ALDH5A1	1	7	7	1	1	0.845098	0.85	7	7	0	0	0	0	1	0	0	start_codon
ALDOA	4	74	18	3.42063	0.82	4.31785	1.11	51	12.5	2	0	0	1	0	0	0	5'utr
ALG5	1	11	11	0.818182	0.82	0.954243	0.95	10	10	1	0	0	0	0	0	0	5'utr
ALKBH2	1	19	19	1	1	1.27875	1.28	16	16	1	0	0	0	0	0	0	5'utr
ALKBH3	1	15	15	1	1	1.17609	1.18	13	13	1	0	0	0	0	0	0	5'utr
ALKBH5	6	90	14	5.2587	0.89	5.98271	0.95	77	12	0	0	2	4	0	0	0	coding
AMH	7	85	12	6.17602	0.94	6.48182	0.95	69	8	0	1	5	0	0	1	0	coding
AMIGO3	1	9	9	1	1	0.954243	0.95	5	5	0	0	1	0	0	0	0	coding
AMMECR1L	1	11	11	0.909091	0.91	0.69897	0.7	10	10	1	0	0	0	0	0	0	5'utr
AMOTL1	2	22	11	1.92308	0.96	2.03342	1.02	20	10	2	0	0	0	0	0	0	5'utr
AMPD2	4	62	10	3.79798	0.95	4.40824	1	42	9	3	0	0	1	0	0	0	5'utr
AMZ2	2	79	39	1.72401	0.86	2.58584	1.29	63	31.5	0	0	0	0	0	0	0	5'utr-intron
AMZ2P1	2	33	16	2	1	2.26007	1.13	18	9	0	0	0	0	0	0	0	processed_transcript
ANAPC11	2	30	15	1.44444	0.72	2.04139	1.02	25	12.5	1	0	0	0	0	0	0	5'utr
ANAPC13	2	22	11	1.72381	0.86	1.89209	0.95	18	9	2	0	0	0	0	0	0	5'utr
ANAPC16	1	8	8	1	1	0.90309	0.9	2	2	1	0	0	0	0	0	0	5'utr
ANKH	1	25	25	0.88	0.88	1.34242	1.34	11	11	1	0	0	0	0	0	0	5'utr
ANKHD1	2	19	9	1.68889	0.84	1.80618	0.9	19	9.5	1	0	1	0	0	0	0	5'utr
ANKIB1	1	7	7	1	1	0.845098	0.85	5	5	1	0	0	0	0	0	0	5'utr
ANKLE2	2	53	26	1.71554	0.86	1.92082	0.96	47	23.5	0	0	1	0	1	0	0	coding
ANKRD10	9	133	9	7.34761	0.83	7.3591	0.85	120	9	1	0	5	1	1	1	0	3'utr
ANKRD11	16	447	17	13.9055	0.87	16.6943	0.97	284	13	2	0	13	0	1	0	0	coding
ANKRD13D	3	32	9	2.22222	0.78	2.59329	0.85	30	9	3	0	0	0	0	0	0	5'utr
ANKRD16	1	16	16	0.875	0.88	1.14613	1.15	13	13	1	0	0	0	0	0	0	5'utr
ANKRD18CP	1	8	8	1	1	0.90309	0.9	3	3	0	0	0	0	0	0	0	unprocessed_pseudogene
ANKRD18DP	1	25	25	0.96	0.96	1.38021	1.38	12	12	0	0	0	0	0	0	0	processed_transcript
ANKRD33B	1	14	14	1	1	1.14613	1.15	13	13	0	0	0	0	0	0	0	nonsense_mediated_decay
ANP32A	6	187	23	5.06047	0.91	6.82659	1.22	96	15.5	3	0	1	2	0	0	0	3'utr
ANP32B	4	44	10	3.22185	0.8	3.69827	0.9	44	10	1	0	2	0	0	0	0	5'utr
ANP32E	4	98	20	3.3518	0.84	3.88874	0.97	87	19	2	0	0	0	1	0	0	coding-intron
ANTXR2	2	40	20	2	1	2.60097	1.3	32	16	2	0	0	0	0	0	0	5'utr
ANXA6	1	13	13	0.923077	0.92	1.07918	1.08	10	10	1	0	0	0	0	0	0	5'utr
AP1G1	1	9	9	0.888889	0.89	0.90309	0.9	8	8	0	0	0	1	0	0	0	3'utr
AP1M1	1	23	23	0.869565	0.87	0.823909	0.82	21	21	0	0	0	1	0	0	0	3'utr
AP1S1	2	18	9	1.81818	0.91	1.79934	0.9	18	9	1	0	0	1	0	0	0	5'utr
AP2S1	2	35	17	1.86957	0.93	2.07918	1.04	28	14	2	0	0	0	0	0	0	5'utr
AP3D1	1	12	12	1	1	1.07918	1.08	11	11	1	0	0	0	0	0	0	5'utr
AP5M1	1	11	11	0.909091	0.91	1	1	5	5	1	0	0	0	0	0	0	5'utr
AP5Z1	1	22	22	0.863636	0.86	0.977724	0.98	20	20	0	0	0	0	0	0	0	coding-intron
APAF1	1	13	13	0.923077	0.92	1.07918	1.08	8	8	1	0	0	0	0	0	0	5'utr
APEX1	2	168	84	1.91875	0.96	2.76938	1.38	96	48	0	0	1	0	0	0	0	5'utr-intron
APEX2	1	8	8	0.875	0.88	0.845098	0.85	4	4	0	0	1	0	0	0	0	coding
APH1A	5	68	12	4.45833	1	5.0964	0.85	54	9	2	0	0	2	0	0	0	3'utr
APITD1-CORT	1	7	7	1	1	0.845098	0.85	6	6	1	0	0	0	0	0	0	5'utr
APOBEC3D	1	24	24	0.875	0.88	1.02119	1.02	19	19	0	0	0	1	0	0	0	3'utr
APOL2	3	60	17	2.84532	0.96	3.49415	1.2	36	11	2	0	0	0	1	0	0	start_codon
APOL6	6	87	13	5.15656	0.86	5.34687	0.85	77	12	2	0	0	3	1	0	0	5'utr
APPBP2	1	14	14	0.857143	0.86	0.778151	0.78	14	14	1	0	0	0	0	0	0	5'utr
ARF1	7	107	10	5.53686	0.8	6.74133	0.9	79	10	0	0	1	5	0	0	0	5'utr-intron
ARF3	5	141	21	4.05255	0.82	5.75151	1.28	125	19	1	1	0	3	0	0	0	3'utr
ARF4	1	31	31	1	1	1.49136	1.49	15	15	1	0	0	0	0	0	0	5'utr
ARF5	2	22	11	1.71429	0.86	1.87506	0.94	19	9.5	1	0	0	1	0	0	0	5'utr
ARF6	8	956	62	6.99242	0.89	10.3401	1.22	343	33.5	5	0	1	0	0	0	0	5'utr-intron
ARFGAP1	7	76	11	5.92065	0.85	5.49395	0.74	69	11	0	0	0	7	0	0	0	3'utr
ARFGEF1	2	35	17	1.77778	0.89	2.26007	1.13	17	8.5	2	0	0	0	0	0	0	5'utr
ARGLU1	2	42	21	1.85455	0.93	2.10037	1.05	23	11.5	1	0	0	0	1	0	0	start_codon
ARHGAP11A	4	52	12	3.57006	0.88	3.5649	0.92	38	9.5	3	0	0	0	0	1	0	5'utr
ARHGAP11B	4	35	9	3.475	0.89	3.48954	0.85	30	7.5	4	0	0	0	0	0	0	5'utr
ARHGAP26	1	8	8	1	1	0.90309	0.9	8	8	1	0	0	0	0	0	0	5'utr
ARHGAP27	1	7	7	1	1	0.845098	0.85	7	7	0	0	0	0	0	1	0	stop_codon
ARHGAP30	8	137	12	6.92485	0.85	7.47735	0.94	111	11.5	4	0	1	1	1	1	0	3'utr
ARHGAP31	1	12	12	0.916667	0.92	1.04139	1.04	11	11	1	0	0	0	0	0	0	5'utr
ARHGAP33	1	11	11	0.909091	0.91	0.69897	0.7	7	7	0	0	1	0	0	0	0	coding
ARHGAP35	2	16	8	1.60317	0.8	1.60206	0.8	15	7.5	0	0	0	1	0	0	0	intron-coding
ARHGDIA	4	60	12	3.35033	0.89	3.73719	0.86	53	11.5	0	0	0	4	0	0	0	3'utr
ARHGDIB	1	7	7	0.857143	0.86	0.778151	0.78	7	7	1	0	0	0	0	0	0	5'utr
ARHGEF1	6	66	9	4.5987	0.76	4.69267	0.79	59	7.5	0	0	4	2	0	0	0	coding
ARHGEF18	1	10	10	0.9	0.9	0.954243	0.95	10	10	0	0	0	1	0	0	0	3'utr
ARHGEF2	3	26	8	2.55	0.8	2.2833	0.78	18	6	0	0	2	1	0	0	0	3'utr
ARHGEF7	1	8	8	0.875	0.88	0.845098	0.85	8	8	0	0	1	0	0	0	0	coding
ARID1A	14	232	12	11.2563	0.83	13.1316	0.93	174	10.5	4	0	9	1	0	0	0	5'utr
ARID1B	1	8	8	0.875	0.88	0.845098	0.85	8	8	0	0	1	0	0	0	0	coding
ARIH1	3	40	13	2.5916	0.88	3.10037	1	35	10	3	0	0	0	0	0	0	5'utr
ARIH2	1	10	10	1	1	1	1	9	9	1	0	0	0	0	0	0	5'utr
ARL13B	2	58	29	1.91304	0.96	2.70243	1.35	51	25.5	2	0	0	0	0	0	0	5'utr
ARL14EP	1	12	12	1	1	1.07918	1.08	11	11	1	0	0	0	0	0	0	5'utr
ARL4C	3	58	20	2.35357	0.8	2.59106	0.88	44	14	2	0	0	1	0	0	0	3'utr
ARL5B	3	159	13	2.79621	0.92	3.74943	1.08	75	12	3	0	0	0	0	0	0	5'utr
ARL6IP1	1	96	96	0.927083	0.93	1.64836	1.65	62	62	1	0	0	0	0	0	0	5'utr
ARL8B	2	22	11	1.79048	0.9	1.62325	0.81	19	9.5	2	0	0	0	0	0	0	5'utr
ARMC1	1	17	17	0.823529	0.82	0.669007	0.67	13	13	1	0	0	0	0	0	0	5'utr
ARMC10	1	18	18	0.777778	0.78	0.845098	0.85	18	18	0	0	0	0	1	0	0	start_codon
ARMC7	3	45	11	2.92593	1	3.28443	1.04	27	7	3	0	0	0	0	0	0	5'utr
ARMCX3	1	37	37	0.891892	0.89	1.04139	1.04	12	12	1	0	0	0	0	0	0	5'utr
ARMCX6	1	9	9	1	1	0.954243	0.95	8	8	1	0	0	0	0	0	0	5'utr
ARPC1A	1	10	10	0.9	0.9	0.653213	0.65	6	6	0	0	0	0	0	0	0	nonsense_mediated_decay
ARPC1B	2	26	13	1.47712	0.74	1.60206	0.8	19	9.5	2	0	0	0	0	0	0	5'utr
ARPC2	1	106	106	0.830189	0.83	1.04139	1.04	55	55	0	0	0	0	0	0	0	5'utr-intron
ARPC3	1	8	8	1	1	0.90309	0.9	6	6	1	0	0	0	0	0	0	5'utr
ARPC4	1	8	8	0.875	0.88	0.845098	0.85	8	8	0	0	0	1	0	0	0	3'utr
ARPC4-TTLL3	1	11	11	0.727273	0.73	0.60206	0.6	10	10	0	0	1	0	0	0	0	coding
ARPC5	3	57	22	2.4697	0.82	3.51055	1.26	52	20	1	0	1	0	1	0	0	coding
ARPC5L	5	74	13	4.21736	0.88	4.61888	0.95	64	13	1	0	2	2	0	0	0	5'utr
ARPP19	1	10	10	0.9	0.9	0.954243	0.95	10	10	0	0	0	0	0	0	0	5'utr-intron
ARRDC1-AS1	1	7	7	0.571429	0.57	0.60206	0.6	5	5	0	0	0	0	0	0	0	antisense
ASB1	6	66	9	5.39028	0.91	5.27933	0.87	47	7.5	2	0	0	4	0	0	0	5'utr
ASB6	2	22	11	1.80357	0.9	1.95904	0.98	20	10	1	0	0	1	0	0	0	3'utr
ASB7	1	8	8	1	1	0.90309	0.9	5	5	1	0	0	0	0	0	0	5'utr
ASCC3	1	10	10	0.7	0.7	0.845098	0.85	6	6	1	0	0	0	0	0	0	5'utr
ASF1A	1	88	88	0.954545	0.95	1.92428	1.92	41	41	1	0	0	0	0	0	0	5'utr
ASF1B	1	7	7	1	1	0.845098	0.85	6	6	1	0	0	0	0	0	0	5'utr
ASH1L	2	15	7	1.46429	0.73	1.47712	0.74	13	6.5	2	0	0	0	0	0	0	5'utr
ASIC2	2	38	19	1.85441	0.93	2.04922	1.02	15	7.5	0	2	0	0	0	0	0	intron
ASPHD2	1	7	7	1	1	0.845098	0.85	6	6	1	0	0	0	0	0	0	5'utr
ASPM	2	63	31	1.96552	0.98	2.97864	1.49	30	15	2	0	0	0	0	0	0	5'utr
ASXL1	6	71	12	4.8706	0.84	5.49776	0.95	61	9.5	1	0	2	1	1	0	0	5'utr
ATAD2B	1	7	7	1	1	0.845098	0.85	7	7	1	0	0	0	0	0	0	5'utr
ATF1	2	19	9	1.75	0.88	1.81954	0.91	11	5.5	0	0	0	0	0	0	0	nonsense_mediated_decay
ATF2	2	21	10	1.91667	0.96	1.99564	1	18	9	2	0	0	0	0	0	0	5'utr
ATF3	1	40	40	0.9	0.9	1.5563	1.56	23	23	1	0	0	0	0	0	0	5'utr
ATF4	5	97	17	4.50007	0.91	5.4456	1.18	73	12	2	0	2	1	0	0	0	5'utr
ATF7IP2	1	16	16	1	1	1.20412	1.2	13	13	1	0	0	0	0	0	0	5'utr
ATG101	5	124	14	3.71	0.75	4.77595	0.78	102	12	4	0	1	0	0	0	0	5'utr
ATG13	2	25	12	1.9	0.95	2.13033	1.07	14	7	2	0	0	0	0	0	0	5'utr
ATG3	2	145	72	1.69745	0.85	2.31191	1.16	80	40	2	0	0	0	0	0	0	5'utr
ATG4B	1	16	16	0.8125	0.81	1.11394	1.11	16	16	0	0	0	1	0	0	0	3'utr
ATG4C	1	10	10	0.9	0.9	0.954243	0.95	9	9	1	0	0	0	0	0	0	5'utr
ATG4D	1	27	27	0.888889	0.89	0.778151	0.78	20	20	1	0	0	0	0	0	0	5'utr
ATG5	2	61	30	1.89651	0.95	2.43933	1.22	41	20.5	2	0	0	0	0	0	0	5'utr
ATL3	4	41	8	3.47143	0.88	3.66181	0.87	33	7	2	0	0	0	0	0	0	5'utr
ATM	1	17	17	1	1	1.23045	1.23	8	8	1	0	0	0	0	0	0	5'utr
ATMIN	1	8	8	0.875	0.88	0.845098	0.85	7	7	0	0	1	0	0	0	0	coding
ATN1	4	203	52	3.64554	0.91	5.04892	1.28	111	33.5	0	3	0	1	0	0	0	intron
ATP13A3	1	25	25	0.76	0.76	1.27875	1.28	17	17	0	1	0	0	0	0	0	intron
ATP1A1	1	28	28	0.75	0.75	0.720159	0.72	20	20	0	0	0	0	0	0	0	retained_intron
ATP2A2	5	323	76	4.09944	0.83	5.33201	0.98	203	45	5	0	0	0	0	0	0	5'utr
ATP2A3	5	53	10	4.77778	1	4.83632	1	46	8	1	0	1	3	0	0	0	3'utr
ATP5A1	1	47	47	0.914894	0.91	1.63347	1.63	29	29	0	0	0	0	0	0	0	intron-5'utr
ATP5B	1	8	8	0.875	0.88	0.845098	0.85	5	5	1	0	0	0	0	0	0	5'utr
ATP5D	1	33	33	0.727273	0.73	0.778151	0.78	31	31	0	0	0	0	1	0	0	start_codon
ATP5E	1	12	12	0.833333	0.83	1	1	12	12	1	0	0	0	0	0	0	5'utr
ATP5G1	2	22	11	1.93333	0.97	1.6902	0.85	14	7	0	0	1	1	0	0	0	coding
ATP5G2	4	95	23	3.35207	0.86	4.55267	1.16	70	16	0	0	2	2	0	0	0	3'utr
ATP5G2P1	1	7	7	1	1	0.845098	0.85	4	4	0	0	0	0	0	0	0	processed_pseudogene
ATP5G3	3	102	40	2.81296	0.96	3.84954	1.41	62	26	1	0	0	1	1	0	0	3'utr
ATP5H	2	25	12	1.65873	0.83	1.62839	0.81	15	7.5	1	0	1	0	0	0	0	coding
ATP5I	1	16	16	0.875	0.88	1.14613	1.15	14	14	0	0	0	0	1	0	0	start_codon
ATP5J	3	76	13	2.76786	1	2.99045	1.03	64	10	0	2	0	0	0	0	0	intron
ATP5L	1	21	21	0.952381	0.95	1.30103	1.3	15	15	1	0	0	0	0	0	0	5'utr
ATP6V0B	2	53	26	1.86957	0.93	1.97004	0.99	42	21	1	0	0	1	0	0	0	5'utr
ATP6V0C	2	107	53	1.71962	0.86	2.40937	1.2	53	26.5	0	0	0	1	0	0	0	intron-5'utr
ATP6V0E1	1	15	15	0.8	0.8	0.60206	0.6	14	14	1	0	0	0	0	0	0	5'utr
ATP6V1H	3	39	11	2.54333	0.82	3.05461	0.95	27	10	3	0	0	0	0	0	0	5'utr
ATP8A2	1	10	10	0.9	0.9	0.954243	0.95	8	8	0	0	0	1	0	0	0	3'utr
ATRAID	1	7	7	0.857143	0.86	0.778151	0.78	5	5	1	0	0	0	0	0	0	5'utr
ATXN1L	1	18	18	0.833333	0.83	0.875061	0.88	18	18	1	0	0	0	0	0	0	5'utr
ATXN2L	6	51	7	5.24741	0.87	4.54753	0.78	44	6.5	1	0	2	1	1	1	0	5'utr
ATXN7L3	10	149	12	8.70171	0.88	9.95522	0.95	124	10	0	0	0	6	0	0	0	3'utr
AUP1	1	11	11	0.909091	0.91	1	1	11	11	1	0	0	0	0	0	0	5'utr
AURKA	1	91	91	0.769231	0.77	0.890856	0.89	67	67	0	0	0	0	0	0	0	5'utr-intron
AURKAIP1	9	149	14	8.60381	1	10.3445	1.11	108	12	5	0	2	0	1	0	0	coding
AURKB	2	26	13	1.775	0.89	1.49831	0.75	23	11.5	0	0	0	0	0	1	0	stop_codon
AUTS2	1	9	9	0.888889	0.89	0.90309	0.9	6	6	0	1	0	0	0	0	0	intron
AXIN1	5	97	12	4.1637	0.83	4.15259	0.85	83	11	2	1	1	0	0	0	0	coding
AZI2	4	72	12	3.4141	0.88	3.78835	0.95	42	8.5	4	0	0	0	0	0	0	5'utr
AZIN1	2	50	25	1.95122	0.98	2.54531	1.27	40	20	2	0	0	0	0	0	0	5'utr
B2M	8	388	20	7.07495	0.86	8.27427	0.92	185	17	0	0	0	4	1	2	0	start_codon
B3GALNT2	3	48	17	2.48323	0.88	2.42834	0.81	32	11	1	0	1	0	1	0	0	coding
B3GALT6	9	118	9	8.25402	0.94	8.95337	0.95	102	9	0	0	7	2	0	0	0	coding
B3GAT3	3	25	9	2.77778	0.89	2.65128	0.9	23	7	0	0	1	1	1	0	0	3'utr
B3GNT2	1	7	7	1	1	0.845098	0.85	3	3	1	0	0	0	0	0	0	5'utr
B4GALT3	2	21	10	1.72727	0.86	1.90309	0.95	20	10	1	0	0	1	0	0	0	3'utr
B4GALT7	1	8	8	1	1	0.90309	0.9	8	8	0	0	0	1	0	0	0	3'utr
B9D2	1	7	7	1	1	0.845098	0.85	5	5	1	0	0	0	0	0	0	5'utr
BACH1	3	48	16	2.5625	1	2.93651	0.9	29	8	0	3	0	0	0	0	0	intron
BACH2	13	325	12	11.4351	0.88	13.6379	0.9	214	11	3	0	7	2	0	1	0	3'utr
BAG1	1	20	20	1	1	1.30103	1.3	8	8	0	0	1	0	0	0	0	coding
BAG2	4	39	10	3.55909	0.9	3.73239	0.98	31	8	4	0	0	0	0	0	0	5'utr
BAG3	2	46	23	1.90909	0.95	2.68124	1.34	28	14	2	0	0	0	0	0	0	5'utr
BAG5	1	9	9	0.888889	0.89	0.90309	0.9	8	8	0	1	0	0	0	0	0	intron
BAHCC1	5	52	9	4.25437	0.86	4.00346	0.85	48	8	0	0	3	2	0	0	0	coding
BAHD1	2	25	12	1.73333	0.87	1.74819	0.87	19	9.5	0	1	0	1	0	0	0	intron
BAIAP2-AS1	3	27	9	2.67778	0.9	2.70243	0.9	26	9	0	0	0	0	0	0	0	lincRNA_exon
BAK1	2	20	10	1.70707	0.85	1.5563	0.78	18	9	1	0	0	1	0	0	0	3'utr
BANF1	1	19	19	0.947368	0.95	1.25527	1.26	11	11	0	0	0	0	0	0	0	5'utr-intron
BAP1	3	39	15	2.49167	0.87	2.73719	0.81	38	15	1	0	0	2	0	0	0	3'utr
BATF3	1	42	42	0.809524	0.81	1.05436	1.05	32	32	1	0	0	0	0	0	0	5'utr
BAZ1A	2	26	13	1.76923	0.88	1.81291	0.91	23	11.5	2	0	0	0	0	0	0	5'utr
BAZ1B	4	63	14	3.38889	0.85	3.65667	0.93	56	11	4	0	0	0	0	0	0	5'utr
BBC3	2	39	19	1.69211	0.85	1.95745	0.98	34	17	0	0	0	2	0	0	0	3'utr
BCAS2	1	9	9	1	1	0.954243	0.95	9	9	0	0	1	0	0	0	0	coding
BCAT1	2	18	9	1.85714	0.93	1.81954	0.91	14	7	2	0	0	0	0	0	0	5'utr
BCL10	1	9	9	0.888889	0.89	0.90309	0.9	9	9	1	0	0	0	0	0	0	5'utr
BCL11B	1	7	7	0.857143	0.86	0.778151	0.78	5	5	0	0	1	0	0	0	0	coding
BCL2	3	74	15	2.61742	0.91	3.10551	1	63	10	1	0	0	2	0	0	0	3'utr
BCL2L1	7	92	12	5.78658	0.83	6.10161	0.9	80	12	1	0	1	5	0	0	0	3'utr
BCL2L11	1	7	7	1	1	0.845098	0.85	7	7	1	0	0	0	0	0	0	5'utr
BCL2L12	2	20	10	1.8	0.9	1.60746	0.8	14	7	0	1	1	0	0	0	0	coding
BCL2L14	4	524	9	3.72087	0.93	4.06867	0.94	86	6	0	0	0	0	0	0	0	nonsense_mediated_decay
BCL7A	4	54	13	3.73214	0.94	4.00346	0.96	37	9.5	1	0	0	3	0	0	0	5'utr
BCL7B	2	29	14	1.95238	0.98	2.20412	1.1	20	10	0	0	0	2	0	0	0	3'utr
BCL9	1	12	12	0.916667	0.92	1.04139	1.04	11	11	0	0	0	1	0	0	0	3'utr
BCL9L	6	67	7	5.38393	0.91	5.68583	0.85	42	7	0	0	4	2	0	0	0	3'utr
BCOR	5	95	11	4.31701	0.9	4.47315	0.85	73	9	1	3	1	0	0	0	0	coding
BCR	2	24	12	1.67832	0.84	2	1	16	8	1	0	1	0	0	0	0	5'utr
BDNF-AS	1	13	13	0.846154	0.85	1.04139	1.04	6	6	0	0	0	0	0	0	0	antisense
BEX1	1	21	21	0.52381	0.52	0.740363	0.74	17	17	1	0	0	0	0	0	0	5'utr
BEX2	2	41	20	1.97059	0.99	2.36361	1.18	26	13	0	0	1	0	0	0	0	coding
BEX4	1	11	11	1	1	1.04139	1.04	6	6	1	0	0	0	0	0	0	5'utr
BFAR	1	9	9	1	1	0.954243	0.95	8	8	1	0	0	0	0	0	0	5'utr
BIRC2	2	47	23	1.91486	0.96	2.70415	1.35	22	11	2	0	0	0	0	0	0	5'utr
BIRC3	3	33	8	2.65278	0.88	2.3592	0.85	32	7	1	0	2	0	0	0	0	5'utr
BIRC5	3	31	8	2.8125	1	2.80414	0.85	29	7	0	0	0	2	1	0	0	start_codon
BIVM	1	11	11	0.909091	0.91	0.69897	0.7	11	11	0	1	0	0	0	0	0	intron
BLMH	1	7	7	0.857143	0.86	0.778151	0.78	6	6	1	0	0	0	0	0	0	5'utr
BLOC1S3	1	24	24	1	1	1.38021	1.38	6	6	0	0	1	0	0	0	0	coding
BLOC1S5	1	12	12	0.666667	0.67	0.90309	0.9	10	10	0	0	0	0	1	0	0	start_codon
BLZF1	1	21	21	0.809524	0.81	1.23045	1.23	21	21	1	0	0	0	0	0	0	5'utr
BMI1	4	102	28	3.11954	0.79	4.61225	1.18	78	20	3	0	0	0	0	0	0	5'utr
BNIP2	1	40	40	0.975	0.98	1.59106	1.59	26	26	0	0	1	0	0	0	0	coding
BOD1	2	30	15	1.70588	0.85	2.19312	1.1	20	10	1	0	0	0	1	0	0	start_codon
BOLA1	1	9	9	0.888889	0.89	0.90309	0.9	8	8	0	1	0	0	0	0	0	intron
BOLA2	2	40	20	1.92857	0.96	2.52892	1.26	16	8	1	0	1	0	0	0	0	coding
BOLA2B	1	11	11	0.818182	0.82	0.954243	0.95	7	7	0	0	1	0	0	0	0	coding
BPTF	1	17	17	0.588235	0.59	1	1	17	17	0	0	1	0	0	0	0	coding
BRAP	1	7	7	0.714286	0.71	0.69897	0.7	7	7	1	0	0	0	0	0	0	5'utr
BRD1	3	28	9	2.70707	0.89	2.15836	0.65	27	9	0	0	1	1	0	1	0	3'utr
BRD2	18	357	12	16.7622	0.92	18.465	1.03	307	12	8	0	5	3	1	1	0	5'utr
BRD3	2	16	8	2	1	1.80618	0.9	11	5.5	0	1	0	1	0	0	0	3'utr
BRD4	5	89	11	4.25783	0.86	4.86079	0.95	68	10	2	0	0	3	0	0	0	3'utr
BRD7	1	7	7	0.857143	0.86	0.778151	0.78	7	7	1	0	0	0	0	0	0	5'utr
BRF1	2	28	14	2	1	2.25527	1.13	22	11	2	0	0	0	0	0	0	5'utr
BRI3BP	2	29	14	1.95238	0.98	1.90309	0.95	13	6.5	0	0	0	2	0	0	0	3'utr
BRIP1	1	21	21	0.857143	0.86	1.25527	1.26	16	16	1	0	0	0	0	0	0	5'utr
BRK1	1	7	7	0.714286	0.71	0.69897	0.7	7	7	0	0	0	0	1	0	0	start_codon
BROX	1	7	7	0.857143	0.86	0.778151	0.78	6	6	1	0	0	0	0	0	0	5'utr
BRPF1	6	122	10	5.30188	0.92	5.93859	0.9	83	10	5	0	0	1	0	0	0	5'utr
BTBD7	1	24	24	0.666667	0.67	0.60206	0.6	23	23	0	0	0	0	1	0	0	start_codon
BTF3	2	139	69	1.85354	0.93	2.49369	1.25	81	40.5	1	0	0	0	0	0	0	5'utr
BTG1	2	87	43	1.58333	0.79	2.35102	1.18	77	38.5	2	0	0	0	0	0	0	5'utr
BTG3	2	62	31	1.86154	0.93	2.35218	1.18	40	20	2	0	0	0	0	0	0	5'utr
BTN2A1	1	15	15	1	1	1.17609	1.18	10	10	1	0	0	0	0	0	0	5'utr
BUB1B	2	27	13	1.65909	0.83	2.07918	1.04	23	11.5	2	0	0	0	0	0	0	5'utr
BUD31	2	50	25	1.7669	0.88	2.22141	1.11	26	13	1	0	0	0	0	1	0	5'utr
BX322557.10	4	71	12	3.44872	0.87	3.55943	0.85	49	10.5	0	0	0	0	0	0	0	lincRNA_exon
BZRAP1	1	8	8	1	1	0.90309	0.9	5	5	0	0	0	1	0	0	0	3'utr
BZW1	1	13	13	0.923077	0.92	1.07918	1.08	11	11	1	0	0	0	0	0	0	5'utr
C10orf2	3	92	10	2.68381	0.86	2.87157	1	63	7	0	0	0	0	0	0	0	processed_transcript
C10orf76	1	7	7	1	1	0.845098	0.85	7	7	0	0	0	0	0	0	0	5'utr-intron
C11orf31	3	105	47	2.58222	0.86	3.72016	1.24	51	15	0	0	2	0	1	0	0	start_codon
C11orf58	2	37	18	1.45556	0.73	1.52827	0.76	28	14	2	0	0	0	0	0	0	5'utr
C11orf84	1	7	7	1	1	0.845098	0.85	3	3	1	0	0	0	0	0	0	5'utr
C11orf95	3	32	11	2.75	1	2.94988	0.95	27	11	0	0	0	3	0	0	0	3'utr
C12orf10	1	7	7	0.857143	0.86	0.778151	0.78	7	7	0	0	0	0	0	0	0	retained_intron
C12orf49	1	31	31	0.741935	0.74	0.884607	0.88	28	28	1	0	0	0	0	0	0	5'utr
C12orf57	2	34	17	1.85833	0.93	2.31597	1.16	19	9.5	1	0	1	0	0	0	0	5'utr
C12orf65	1	7	7	0.857143	0.86	0.778151	0.78	6	6	0	0	1	0	0	0	0	coding
C12orf73	2	28	14	1.80952	0.9	2.07918	1.04	20	10	2	0	0	0	0	0	0	5'utr
C14orf2	1	16	16	1	1	1.20412	1.2	15	15	1	0	0	0	0	0	0	5'utr
C16orf72	9	529	10	8.31844	0.93	8.51406	0.85	290	9	2	7	0	0	0	0	0	5'utr
C16orf91	1	12	12	1	1	1.07918	1.08	6	6	0	0	1	0	0	0	0	coding
C16orf95	1	10	10	1	1	1	1	9	9	1	0	0	0	0	0	0	5'utr
C17orf49	1	8	8	1	1	0.90309	0.9	8	8	0	0	0	1	0	0	0	3'utr
C17orf51	4	95	21	3.90278	0.98	5.22565	1.3	63	14	3	0	0	1	0	0	0	3'utr
C17orf62	5	60	13	4.3707	0.87	4.40398	0.81	50	11	1	1	1	2	0	0	0	3'utr
C17orf96	7	110	16	6.46711	0.92	7.55	1	79	9	4	0	1	2	0	0	0	3'utr
C18orf25	3	75	25	2.80235	0.92	3.7553	1.18	53	16	3	0	0	0	0	0	0	5'utr
C18orf32	1	13	13	0.769231	0.77	1	1	10	10	0	0	0	0	0	0	0	5'utr-intron
C18orf54	4	61	15	3.66353	0.91	4.17748	1.01	45	10.5	1	3	0	0	0	0	0	5'utr
C19orf24	1	11	11	0.909091	0.91	1	1	9	9	0	0	1	0	0	0	0	coding
C19orf43	1	28	28	0.714286	0.71	0.69897	0.7	26	26	0	0	1	0	0	0	0	coding
C19orf48	2	16	8	1.74603	0.87	1.68124	0.84	15	7.5	0	0	1	1	0	0	0	3'utr
C19orf53	1	9	9	0.888889	0.89	0.90309	0.9	8	8	0	0	1	0	0	0	0	coding
C19orf54	1	10	10	0.9	0.9	0.954243	0.95	7	7	0	0	0	0	0	0	0	nonsense_mediated_decay
C19orf68	1	8	8	1	1	0.90309	0.9	8	8	0	0	1	0	0	0	0	coding
C19orf81	1	27	27	1	1	1.43136	1.43	20	20	0	0	1	0	0	0	0	coding
C1QBP	3	35	12	2.43651	0.83	2.60206	0.9	34	11	0	0	3	0	0	0	0	coding
C1orf109	1	7	7	0.714286	0.71	0.69897	0.7	6	6	1	0	0	0	0	0	0	5'utr
C1orf122	1	10	10	1	1	1	1	9	9	0	0	1	0	0	0	0	coding
C1orf174	1	11	11	0.909091	0.91	1	1	11	11	1	0	0	0	0	0	0	5'utr
C1orf21	1	10	10	0.9	0.9	0.653213	0.65	4	4	1	0	0	0	0	0	0	5'utr
C1orf35	1	7	7	1	1	0.845098	0.85	7	7	1	0	0	0	0	0	0	5'utr
C1orf43	3	68	24	2.58333	0.83	3.27646	0.95	41	15	2	0	0	1	0	0	0	3'utr
C1orf52	1	7	7	1	1	0.845098	0.85	6	6	0	1	0	0	0	0	0	intron
C1orf61	1	21	21	0.857143	0.86	0.653213	0.65	7	7	0	1	0	0	0	0	0	intron
C1orf86	7	149	15	6.22248	0.9	7.27726	1.08	120	14	0	2	2	2	0	0	0	3'utr
C20orf24	2	98	49	1.86026	0.93	2.82898	1.41	49	24.5	2	0	0	0	0	0	0	5'utr
C21orf58	1	7	7	0.857143	0.86	0.778151	0.78	7	7	0	0	1	0	0	0	0	coding
C21orf59	2	66	33	1.89808	0.95	2.67025	1.34	46	23	2	0	0	0	0	0	0	5'utr
C22orf29	1	7	7	0.857143	0.86	0.778151	0.78	7	7	0	0	0	1	0	0	0	3'utr
C22orf46	1	9	9	0.888889	0.89	0.60206	0.6	7	7	0	0	0	1	0	0	0	3'utr
C2CD2L	4	57	14	3.27807	0.78	3.79741	1	46	11	2	0	0	1	1	0	0	5'utr
C2orf81	2	16	8	2	1	1.80618	0.9	10	5	0	2	0	0	0	0	0	intron
C2orf88	2	64	32	1.67071	0.84	2.53656	1.27	40	20	0	0	0	0	0	0	0	processed_transcript
C3orf38	2	21	10	1.90909	0.95	2	1	19	9.5	2	0	0	0	0	0	0	5'utr
C3orf58	1	13	13	0.923077	0.92	1.07918	1.08	5	5	1	0	0	0	0	0	0	5'utr
C4orf29	1	16	16	0.9375	0.94	1.17609	1.18	8	8	1	0	0	0	0	0	0	5'utr
C4orf46	1	16	16	1	1	1.20412	1.2	8	8	1	0	0	0	0	0	0	5'utr
C5orf24	1	13	13	1	1	1.11394	1.11	8	8	1	0	0	0	0	0	0	5'utr
C6orf106	1	35	35	0.857143	0.86	1	1	23	23	1	0	0	0	0	0	0	5'utr
C6orf120	1	22	22	0.954545	0.95	1.32222	1.32	13	13	1	0	0	0	0	0	0	5'utr
C6orf211	1	7	7	1	1	0.845098	0.85	6	6	1	0	0	0	0	0	0	5'utr
C6orf223	1	9	9	0.555556	0.56	0.69897	0.7	6	6	0	0	1	0	0	0	0	coding
C6orf62	14	346	18	11.8382	0.85	13.9674	0.99	299	15	10	0	2	1	1	0	0	3'utr
C7orf26	2	93	46	1.82558	0.91	2.39533	1.2	72	36	1	0	1	0	0	0	0	5'utr
C7orf31	1	8	8	1	1	0.90309	0.9	6	6	1	0	0	0	0	0	0	5'utr
C7orf43	1	10	10	0.9	0.9	0.653213	0.65	8	8	1	0	0	0	0	0	0	5'utr
C7orf49	1	8	8	1	1	0.90309	0.9	4	4	1	0	0	0	0	0	0	5'utr
C7orf55-LUC7L2	4	472	33	3.50586	0.91	5.10573	1.23	206	12.5	1	1	0	1	1	0	0	5'utr
C8orf33	1	21	21	0.904762	0.9	0.801632	0.8	16	16	0	0	1	0	0	0	0	coding
C9orf16	1	20	20	0.85	0.85	1.23045	1.23	14	14	1	0	0	0	0	0	0	5'utr
C9orf3	1	78	78	0.807692	0.81	1.10037	1.1	9	9	0	1	0	0	0	0	0	intron
C9orf40	2	35	17	1.76667	0.88	2.36922	1.18	30	15	2	0	0	0	0	0	0	5'utr
C9orf69	1	7	7	1	1	0.845098	0.85	7	7	0	0	0	1	0	0	0	3'utr
C9orf91	1	8	8	0.75	0.75	0.778151	0.78	8	8	1	0	0	0	0	0	0	5'utr
CAB39	1	31	31	0.774194	0.77	1.38021	1.38	25	25	1	0	0	0	0	0	0	5'utr
CABIN1	1	7	7	1	1	0.845098	0.85	5	5	0	0	1	0	0	0	0	coding
CACNB3	1	8	8	1	1	0.90309	0.9	8	8	1	0	0	0	0	0	0	5'utr
CACTIN	1	9	9	1	1	0.954243	0.95	7	7	0	0	0	1	0	0	0	3'utr
CACUL1	1	35	35	0.857143	0.86	1	1	17	17	1	0	0	0	0	0	0	5'utr
CACYBP	3	90	29	2.47512	0.82	2.8893	1.01	75	27	3	0	0	0	0	0	0	5'utr
CAD	1	7	7	0.857143	0.86	0.778151	0.78	6	6	1	0	0	0	0	0	0	5'utr
CALM1	1	19	19	0.947368	0.95	1.25527	1.26	15	15	1	0	0	0	0	0	0	5'utr
CALM2	1	30	30	0.9	0.9	1.13033	1.13	22	22	0	0	0	0	1	0	0	start_codon
CALM3	4	69	15	3.18349	0.73	3.21906	0.8	58	12	2	0	0	2	0	0	0	5'utr
CALR	3	69	15	2.32516	0.82	3.19852	0.95	49	15	1	0	2	0	0	0	0	5'utr
CAMK2D	2	21	10	2	1	1.99123	1	18	9	2	0	0	0	0	0	0	5'utr
CAMK2N1	2	26	13	2	1	2.21748	1.11	19	9.5	2	0	0	0	0	0	0	5'utr
CAMSAP1	1	17	17	0.882353	0.88	0.69897	0.7	7	7	0	0	1	0	0	0	0	coding
CAMTA2	1	12	12	0.833333	0.83	0.69897	0.7	12	12	0	0	0	1	0	0	0	3'utr
CAND1	2	28	14	1.84444	0.92	2.18469	1.09	21	10.5	2	0	0	0	0	0	0	5'utr
CANT1	3	35	11	2.66623	0.9	2.73239	1	32	10	0	0	0	3	0	0	0	3'utr
CANX	1	16	16	0.75	0.75	0.60206	0.6	11	11	1	0	0	0	0	0	0	5'utr
CAP1	1	7	7	1	1	0.845098	0.85	6	6	0	0	0	0	0	0	0	5'utr-intron
CAPN15	73	1275	16	62.0357	0.86	70.303	0.93	1086	12	0	42	20	8	1	0	0	intron
CAPN7	1	8	8	0.75	0.75	0.778151	0.78	8	8	1	0	0	0	0	0	0	5'utr
CAPNS1	1	8	8	0.75	0.75	0.778151	0.78	7	7	1	0	0	0	0	0	0	5'utr
CARHSP1	1	21	21	0.809524	0.81	1.23045	1.23	20	20	1	0	0	0	0	0	0	5'utr
CASC15	3	87	34	2.75192	0.88	3.44716	1.12	66	26	0	0	0	0	0	0	0	lincRNA_intron
CASC4	1	42	42	0.857143	0.86	0.778151	0.78	30	30	1	0	0	0	0	0	0	5'utr
CASC7	2	22	11	1.70085	0.85	1.92428	0.96	17	8.5	0	0	0	0	0	0	0	lincRNA_exon
CASK	2	45	22	1.91107	0.96	2.36361	1.18	25	12.5	2	0	0	0	0	0	0	5'utr
CASP3	1	19	19	0.947368	0.95	1.25527	1.26	17	17	1	0	0	0	0	0	0	5'utr
CASP8	1	10	10	1	1	1	1	9	9	1	0	0	0	0	0	0	5'utr
CASP8AP2	2	34	17	1.82011	0.91	2.19312	1.1	30	15	2	0	0	0	0	0	0	5'utr
CBFA2T3	2	28	14	1.70053	0.85	2.13033	1.07	20	10	0	2	0	0	0	0	0	intron
CBFB	5	171	12	4.20006	0.81	4.70603	0.95	117	11	3	0	1	0	1	0	0	5'utr
CBL	2	28	14	1.83626	0.92	2.15836	1.08	19	9.5	2	0	0	0	0	0	0	5'utr
CBWD1	1	7	7	1	1	0.845098	0.85	5	5	1	0	0	0	0	0	0	5'utr
CBWD2	1	9	9	0.888889	0.89	0.90309	0.9	9	9	1	0	0	0	0	0	0	5'utr
CBWD3	1	120	120	0.975	0.98	1.76716	1.77	13	13	1	0	0	0	0	0	0	5'utr
CBWD5	1	11	11	0.636364	0.64	0.845098	0.85	9	9	1	0	0	0	0	0	0	5'utr
CBX1	2	37	18	1.64762	0.82	2.14613	1.07	30	15	2	0	0	0	0	0	0	5'utr
CBX2	1	9	9	0.888889	0.89	0.90309	0.9	9	9	1	0	0	0	0	0	0	5'utr
CBX3	5	154	26	4.0326	0.85	4.70896	0.95	134	19	0	5	0	0	0	0	0	intron
CBX4	2	61	30	1.69118	0.85	1.64345	0.82	46	23	1	0	0	1	0	0	0	3'utr
CBX5	10	129	9	9.20501	0.93	9.73253	0.92	101	7.5	0	0	0	9	0	0	0	3'utr
CBX6	17	277	14	14.6872	0.83	15.0132	0.85	236	12	0	0	1	16	0	0	0	3'utr
CBX8	1	8	8	1	1	0.90309	0.9	8	8	0	0	0	1	0	0	0	3'utr
CCAR2	3	28	9	2.45556	0.9	2.60746	0.95	24	9	1	0	1	1	0	0	0	5'utr
CCDC101	1	23	23	0.913043	0.91	1.32222	1.32	15	15	1	0	0	0	0	0	0	5'utr
CCDC117	1	7	7	0.857143	0.86	0.778151	0.78	6	6	0	0	0	0	1	0	0	start_codon
CCDC124	1	20	20	1	1	1.30103	1.3	14	14	0	0	1	0	0	0	0	coding
CCDC126	1	7	7	1	1	0.845098	0.85	7	7	1	0	0	0	0	0	0	5'utr
CCDC130	1	7	7	1	1	0.845098	0.85	7	7	0	0	1	0	0	0	0	coding
CCDC167	1	16	16	1	1	1.20412	1.2	10	10	0	0	1	0	0	0	0	coding
CCDC34	1	8	8	0.875	0.88	0.845098	0.85	7	7	0	0	0	0	1	0	0	start_codon
CCDC47	1	7	7	0.714286	0.71	0.69897	0.7	7	7	1	0	0	0	0	0	0	5'utr
CCDC71L	1	11	11	1	1	1.04139	1.04	7	7	1	0	0	0	0	0	0	5'utr
CCDC85B	1	8	8	1	1	0.90309	0.9	7	7	0	0	0	1	0	0	0	3'utr
CCM2	1	15	15	0.8	0.8	1.07918	1.08	12	12	0	0	0	1	0	0	0	3'utr
CCNA2	3	132	29	2.64814	0.88	3.10037	0.85	89	25	2	0	1	0	0	0	0	coding
CCNB1	2	75	37	1.84787	0.92	2.14613	1.07	69	34.5	1	0	0	0	1	0	0	5'utr
CCNB2	2	28	14	1.67251	0.84	1.77452	0.89	27	13.5	1	0	0	0	1	0	0	5'utr
CCNC	1	14	14	0.857143	0.86	1.07918	1.08	14	14	1	0	0	0	0	0	0	5'utr
CCND3	1	14	14	0.785714	0.79	0.740363	0.74	11	11	1	0	0	0	0	0	0	5'utr
CCNG1	1	15	15	1	1	1.17609	1.18	6	6	1	0	0	0	0	0	0	5'utr
CCNG2	3	49	10	2.66667	0.87	2.67025	0.95	42	9	2	0	0	0	0	0	0	5'utr
CCNI	6	142	25	4.91289	0.84	6.06905	0.93	96	14.5	5	0	1	0	0	0	0	coding
CCNY	3	45	17	2.60131	0.82	2.96895	0.85	40	15	0	3	0	0	0	0	0	intron
CCNYL1	1	35	35	1	1	1.54407	1.54	10	10	1	0	0	0	0	0	0	5'utr
CCRN4L	1	9	9	0.888889	0.89	0.90309	0.9	8	8	0	0	1	0	0	0	0	coding
CCSER2	1	22	22	0.818182	0.82	1.25527	1.26	21	21	1	0	0	0	0	0	0	5'utr
CCT2	1	7	7	1	1	0.845098	0.85	6	6	1	0	0	0	0	0	0	5'utr
CCT3	1	8	8	0.875	0.88	0.845098	0.85	8	8	0	0	0	0	1	0	0	start_codon
CCT4	2	46	23	1.75524	0.88	2.21748	1.11	33	16.5	2	0	0	0	0	0	0	5'utr
CCT6A	1	12	12	0.833333	0.83	1	1	7	7	1	0	0	0	0	0	0	5'utr
CCT7	1	7	7	0.857143	0.86	0.778151	0.78	4	4	1	0	0	0	0	0	0	5'utr
CCT8	1	7	7	0.857143	0.86	0.778151	0.78	7	7	1	0	0	0	0	0	0	5'utr
CD164	1	8	8	1	1	0.90309	0.9	7	7	0	0	0	1	0	0	0	3'utr
CD247	3	33	12	2.67308	0.92	2.63548	0.9	32	12	0	0	0	2	1	0	0	3'utr
CD27-AS1	1	10	10	0.9	0.9	0.954243	0.95	10	10	0	0	0	0	0	0	0	retained_intron
CD28	3	25	9	2.88889	1	2.70243	0.9	22	7	0	0	1	2	0	0	0	coding
CD2AP	1	19	19	0.947368	0.95	1.25527	1.26	16	16	1	0	0	0	0	0	0	5'utr
CD2BP2	7	66	10	6.7	1	6.65915	0.95	58	8	1	0	2	4	0	0	0	3'utr
CD3D	6	170	11	5.33459	0.88	5.82421	0.99	109	11	0	0	4	0	1	1	0	stop_codon
CD3E	2	31	15	1.86957	0.93	1.727	0.86	26	13	0	0	0	1	0	0	0	intron-coding
CD47	2	29	14	2	1	2.32222	1.16	25	12.5	1	0	1	0	0	0	0	coding
CD5	1	9	9	0.777778	0.78	0.845098	0.85	9	9	0	0	0	1	0	0	0	3'utr
CD53	2	32	16	1.71861	0.86	1.62839	0.81	31	15.5	1	0	0	1	0	0	0	5'utr
CD6	2	38	19	1.55172	0.78	2.15836	1.08	16	8	1	0	0	0	0	0	0	5'utr
CD69	4	67	16	3.44017	0.89	3.88807	1.07	62	15.5	0	0	1	2	1	0	0	3'utr
CD81	3	44	16	2.1875	0.75	2.37337	0.85	36	14	1	0	0	2	0	0	0	5'utr
CD82	14	392	18	12.2863	0.89	14.3749	1.07	285	13.5	1	2	3	5	1	0	0	5'utr
CD99	3	32	11	2.55332	0.88	2.54407	0.85	27	9	2	0	0	0	1	0	0	5'utr
CDC20	2	19	9	1.88889	0.94	1.90309	0.95	17	8.5	1	0	0	0	0	0	0	5'utr-intron
CDC25A	4	113	18	3.56516	0.89	3.81606	0.87	91	15	3	0	0	1	0	0	0	3'utr
CDC25C	1	9	9	1	1	0.954243	0.95	6	6	1	0	0	0	0	0	0	5'utr
CDC26	1	16	16	0.9375	0.94	1.17609	1.18	15	15	1	0	0	0	0	0	0	5'utr
CDC34	1	9	9	0.888889	0.89	0.60206	0.6	9	9	1	0	0	0	0	0	0	5'utr
CDC42SE1	3	51	13	2.89286	1	3.51188	1.11	39	13	2	0	0	1	0	0	0	3'utr
CDCA2	2	73	36	1.76132	0.88	2.4351	1.22	57	28.5	2	0	0	0	0	0	0	5'utr
CDCA3	1	10	10	0.9	0.9	0.954243	0.95	10	10	1	0	0	0	0	0	0	5'utr
CDCA5	13	177	16	11.0261	0.83	12.0615	0.9	165	13	1	0	1	11	0	0	0	3'utr
CDCA8	3	63	19	2.63626	0.89	3.30449	1.26	46	15	1	0	0	1	0	0	0	5'utr-intron
CDIPT	5	134	15	4.69137	0.92	5.43303	1.15	91	12	2	0	0	2	0	0	0	3'utr
CDK1	1	60	60	0.916667	0.92	1.74036	1.74	29	29	0	0	0	0	0	0	0	5'utr-intron
CDK12	3	25	9	2.46032	0.89	2.15836	0.6	23	7	2	0	0	1	0	0	0	5'utr
CDK13	8	166	13	6.70515	0.85	8.05025	0.98	98	11	4	0	4	0	0	0	0	5'utr
CDK16	1	11	11	1	1	1.04139	1.04	11	11	1	0	0	0	0	0	0	5'utr
CDK17	4	107	23	3.59432	0.89	4.823	1.33	72	16	4	0	0	0	0	0	0	5'utr
CDK2	4	78	9	3.46886	0.89	4.22608	0.91	42	8.5	2	0	0	1	1	0	0	5'utr
CDK2AP2	5	189	18	4.59295	0.94	6.06776	1.26	118	15	4	0	1	0	0	0	0	coding
CDK4	1	127	127	0.944882	0.94	1.60206	1.6	58	58	1	0	0	0	0	0	0	5'utr
CDK6	26	918	12	22.7423	0.88	25.5575	0.93	474	12	2	2	0	22	0	0	0	3'utr
CDK7	2	21	10	1.92308	0.96	1.98227	0.99	18	9	1	0	0	0	1	0	0	5'utr
CDK8	4	62	16	3.63961	0.91	4.11949	1	51	13.5	4	0	0	0	0	0	0	5'utr
CDKN1B	8	311	22	7.37473	0.92	9.48864	1.14	205	19	4	0	1	3	0	0	0	5'utr
CDKN2AIP	3	31	10	2.85714	1	2.92428	1	19	7	2	0	1	0	0	0	0	5'utr
CDKN2AIPNL	1	8	8	1	1	0.90309	0.9	5	5	0	0	1	0	0	0	0	coding
CDKN2C	10	406	24	9.20058	0.92	11.7438	1.06	227	19	9	0	0	0	0	0	0	5'utr
CDKN2D	1	8	8	0.875	0.88	0.845098	0.85	7	7	1	0	0	0	0	0	0	5'utr
CDR2	4	83	23	3.80451	0.94	4.98831	1.34	53	14	4	0	0	0	0	0	0	5'utr
CDT1	2	20	10	1.84615	0.92	1.88649	0.94	18	9	0	0	1	1	0	0	0	coding
CDV3	3	188	78	2.81818	1	4.54094	1.61	87	22	2	0	0	1	0	0	0	5'utr
CEBPB	6	70	11	5.83333	1	6.25334	1	55	8.5	0	0	3	2	0	1	0	coding
CECR5	3	37	13	2.62222	0.89	3.05843	1.04	26	8	0	1	1	0	0	1	0	stop_codon
CELF1	1	9	9	1	1	0.954243	0.95	8	8	0	0	0	1	0	0	0	3'utr
CENPA	2	74	37	1.66583	0.83	2.1383	1.07	54	27	1	0	0	0	1	0	0	5'utr
CENPB	11	427	14	9.38423	0.86	11.384	1	238	13	2	0	8	1	0	0	0	3'utr
CENPBD1	1	7	7	1	1	0.845098	0.85	7	7	1	0	0	0	0	0	0	5'utr
CENPBD1P1	1	14	14	0.928571	0.93	1.11394	1.11	14	14	0	0	0	0	0	0	0	processed_transcript
CENPC	1	10	10	1	1	1	1	6	6	1	0	0	0	0	0	0	5'utr
CENPF	1	11	11	0.727273	0.73	0.60206	0.6	10	10	1	0	0	0	0	0	0	5'utr
CENPJ	1	8	8	1	1	0.90309	0.9	3	3	1	0	0	0	0	0	0	5'utr
CENPL	1	17	17	0.9375	0.94	1.17609	1.18	11	11	1	0	0	0	0	0	0	5'utr
CENPM	1	8	8	1	1	0.90309	0.9	8	8	0	1	0	0	0	0	0	intron
CENPO	3	30	11	2.28247	0.75	2.30643	0.7	30	11	0	0	1	2	0	0	0	coding
CENPW	1	76	76	0.973684	0.97	1.86923	1.87	36	36	1	0	0	0	0	0	0	5'utr
CEP135	2	18	9	1.88889	0.94	1.5563	0.78	11	5.5	2	0	0	0	0	0	0	5'utr
CEP170	1	7	7	1	1	0.845098	0.85	6	6	1	0	0	0	0	0	0	5'utr
CEP19	1	10	10	0.9	0.9	0.653213	0.65	10	10	1	0	0	0	0	0	0	5'utr
CEP250	1	7	7	0.857143	0.86	0.778151	0.78	6	6	0	0	0	0	0	0	0	processed_transcript
CEP350	1	26	26	0.846154	0.85	1.34242	1.34	16	16	1	0	0	0	0	0	0	5'utr
CEP44	1	9	9	0.888889	0.89	0.90309	0.9	9	9	1	0	0	0	0	0	0	5'utr
CEP55	2	18	9	1.875	0.94	1.8451	0.92	17	8.5	2	0	0	0	0	0	0	5'utr
CEP57	1	8	8	1	1	0.90309	0.9	8	8	1	0	0	0	0	0	0	5'utr
CEP72	10	104	8	8.88934	0.88	8.56678	0.85	93	7.5	0	6	2	0	1	0	0	start_codon
CEP95	1	8	8	1	1	0.90309	0.9	7	7	1	0	0	0	0	0	0	5'utr
CEPT1	1	7	7	0.857143	0.86	0.778151	0.78	6	6	1	0	0	0	0	0	0	5'utr
CERK	1	9	9	1	1	0.954243	0.95	5	5	0	0	0	1	0	0	0	3'utr
CERS2	1	13	13	0.615385	0.62	0.60206	0.6	11	11	1	0	0	0	0	0	0	5'utr
CERS6	1	12	12	0.916667	0.92	1.04139	1.04	10	10	1	0	0	0	0	0	0	5'utr
CFAP20	3	132	19	2.59559	0.89	3.75679	0.93	76	10	2	0	0	1	0	0	0	3'utr
CFAP97	1	8	8	0.625	0.63	0.69897	0.7	7	7	1	0	0	0	0	0	0	5'utr
CFDP1	1	9	9	0.555556	0.56	0.69897	0.7	5	5	1	0	0	0	0	0	0	5'utr
CFL1	6	333	20	5.00672	0.83	6.5555	1.09	189	16.5	2	0	1	3	0	0	0	3'utr
CFLAR	2	31	15	1.75641	0.88	1.95424	0.98	29	14.5	2	0	0	0	0	0	0	5'utr
CGGBP1	2	23	11	1.85714	0.93	1.98227	0.99	20	10	1	1	0	0	0	0	0	5'utr
CH17-118O6.3	1	425	425	0.778824	0.78	0.787434	0.79	35	35	0	0	0	0	0	0	0	antisense
CH17-472G23.4	1	12	12	0.833333	0.83	1	1	11	11	0	0	0	0	0	0	0	unprocessed_pseudogene
CH507-513H4.1	7	260	18	4.08796	0.56	5.85189	0.87	114	11	0	0	0	0	0	0	0	lincRNA_intron
CH507-528H12.1	12	207	16	8.55837	0.77	10.1487	0.78	117	8.5	0	0	0	0	0	0	0	lincRNA_intron
CHAMP1	2	22	11	1.67857	0.84	1.59106	0.8	18	9	2	0	0	0	0	0	0	5'utr
CHCHD1	1	11	11	0.909091	0.91	1	1	10	10	0	0	0	0	1	0	0	start_codon
CHCHD2P6	1	10	10	0.9	0.9	0.954243	0.95	8	8	0	0	0	0	0	0	0	processed_pseudogene
CHCHD3	1	12	12	1	1	1.07918	1.08	6	6	0	1	0	0	0	0	0	intron
CHD1	2	17	8	2	1	1.85733	0.93	17	8.5	2	0	0	0	0	0	0	5'utr
CHD3	5	46	9	4.14628	0.86	4.37144	0.85	40	8	0	0	3	2	0	0	0	coding
CHD4	4	62	15	3.2343	0.81	3.96567	0.92	36	9.5	2	0	1	1	0	0	0	3'utr
CHD8	1	8	8	1	1	0.90309	0.9	8	8	0	0	0	1	0	0	0	3'utr
CHI3L2	1	10	10	1	1	1	1	9	9	0	0	1	0	0	0	0	coding
CHIC2	2	33	16	1.77068	0.89	2.31806	1.16	29	14.5	2	0	0	0	0	0	0	5'utr
CHMP1A	1	12	12	0.833333	0.83	1	1	12	12	0	0	0	1	0	0	0	3'utr
CHMP2B	4	77	18	3.75718	0.94	4.89167	1.2	40	10	4	0	0	0	0	0	0	5'utr
CHMP7	2	24	12	1.72727	0.86	1.716	0.86	22	11	0	0	0	1	1	0	0	start_codon
CHPF2	1	14	14	1	1	1.14613	1.15	8	8	1	0	0	0	0	0	0	5'utr
CHST11	3	188	59	2.56803	0.86	3.71809	1.2	99	42	2	0	0	1	0	0	0	5'utr
CHST2	19	1045	32	16.7556	0.88	21.7948	1.15	704	25	7	0	9	2	1	0	0	5'utr
CHSY1	11	461	28	9.24948	0.89	11.9877	1.06	326	24	5	1	4	0	1	0	0	coding
CHTF8	5	55	9	4.39624	0.89	4.49415	0.9	48	9	1	0	0	4	0	0	0	3'utr
CHTOP	5	118	26	4.60202	0.9	5.01995	0.85	91	21	2	1	1	1	0	0	0	5'utr
CHURC1	1	16	16	0.9375	0.94	1.17609	1.18	11	11	0	0	0	0	1	0	0	start_codon
CIAO1	2	23	11	1.59231	0.8	1.30643	0.65	20	10	1	0	0	0	0	0	0	5'utr
CIC	7	117	10	6.19299	0.88	6.56501	0.9	103	10	0	0	3	1	0	0	0	processed_transcript
CIRBP	2	24	12	1.81818	0.91	2.06819	1.03	23	11.5	1	0	0	1	0	0	0	5'utr
CISD3	1	7	7	0.571429	0.57	0.60206	0.6	7	7	0	1	0	0	0	0	0	intron
CKLF	1	7	7	0.857143	0.86	0.778151	0.78	7	7	1	0	0	0	0	0	0	5'utr
CKLF-CMTM1	1	9	9	0.888889	0.89	0.60206	0.6	9	9	1	0	0	0	0	0	0	5'utr
CKS1B	1	30	30	1	1	1.47712	1.48	23	23	1	0	0	0	0	0	0	5'utr
CKS2	3	188	16	2.87689	0.94	3.21152	0.88	92	16	1	0	1	0	1	0	0	5'utr
CLCN3	1	7	7	1	1	0.845098	0.85	6	6	0	0	0	1	0	0	0	3'utr
CLEC2B	2	31	15	1.47727	0.74	1.77815	0.89	30	15	2	0	0	0	0	0	0	5'utr
CLIC1	3	597	137	2.67445	0.91	3.91244	1.28	297	72	0	0	0	1	0	0	0	3'utr
CLINT1	1	14	14	0.785714	0.79	1.04139	1.04	11	11	0	0	0	0	0	0	0	5'utr-intron
CLK2	1	45	45	0.955556	0.96	1.33244	1.33	20	20	1	0	0	0	0	0	0	5'utr
CLN3	2	25	12	1.76471	0.88	1.53991	0.77	24	12	0	1	0	0	1	0	0	start_codon
CLPTM1L	2	20	10	1.49451	0.75	1.68124	0.84	19	9.5	2	0	0	0	0	0	0	5'utr
CLPX	1	18	18	1	1	1.25527	1.26	14	14	1	0	0	0	0	0	0	5'utr
CLSTN1	1	15	15	0.866667	0.87	1.11394	1.11	14	14	0	0	0	0	1	0	0	start_codon
CLSTN3	2	26	13	1.72222	0.86	1.53991	0.77	22	11	2	0	0	0	0	0	0	5'utr
CLTA	2	86	43	1.88684	0.94	2.8293	1.41	58	29	1	0	1	0	0	0	0	5'utr
CLTC	3	55	20	2.50278	0.85	2.92065	0.85	41	16	3	0	0	0	0	0	0	5'utr
CLUH	1	24	24	0.791667	0.79	0.977724	0.98	21	21	0	0	0	1	0	0	0	3'utr
CMC1	1	7	7	1	1	0.845098	0.85	6	6	1	0	0	0	0	0	0	5'utr
CMC2	2	44	22	1.92593	0.96	2.15127	1.08	32	16	2	0	0	0	0	0	0	5'utr
CMPK1	1	9	9	0.888889	0.89	0.90309	0.9	9	9	0	0	0	1	0	0	0	3'utr
CMTM3	4	49	11	3.50936	0.88	3.76582	0.95	47	11.5	0	0	0	2	0	0	0	5'utr-intron
CMTM6	1	7	7	0.857143	0.86	0.778151	0.78	7	7	1	0	0	0	0	0	0	5'utr
CNBP	4	156	11	3.73909	0.94	4.57386	1.01	71	9	2	0	1	1	0	0	0	3'utr
CNDP2	2	18	9	1.66667	0.83	1.74819	0.87	17	8.5	1	1	0	0	0	0	0	5'utr
CNIH4	2	47	23	1.825	0.91	1.88649	0.94	29	14.5	0	1	0	0	1	0	0	start_codon
CNNM3	1	8	8	1	1	0.90309	0.9	5	5	0	0	1	0	0	0	0	coding
CNOT1	1	40	40	0.9	0.9	1.25527	1.26	16	16	1	0	0	0	0	0	0	5'utr
CNOT11	2	49	24	1.77744	0.89	2.11227	1.06	35	17.5	0	0	2	0	0	0	0	coding
CNOT3	1	9	9	0.777778	0.78	0.845098	0.85	8	8	1	0	0	0	0	0	0	5'utr
CNOT6	1	12	12	0.75	0.75	0.954243	0.95	11	11	0	0	0	0	0	0	0	intron-5'utr
CNOT8	3	74	24	2.50962	0.88	3.62655	1.36	56	16	1	0	0	0	0	0	0	5'utr-intron
CNP	1	9	9	0.777778	0.78	0.845098	0.85	8	8	0	0	0	1	0	0	0	3'utr
CNPPD1	2	20	10	1.83333	0.92	1.60206	0.8	16	8	0	0	0	2	0	0	0	3'utr
CNPY2	2	28	14	1.82353	0.91	1.7104	0.86	24	12	2	0	0	0	0	0	0	5'utr
CNPY3	4	37	8	3.25	0.81	3.38917	0.77	28	7	3	0	0	1	0	0	0	5'utr
CNST	1	24	24	0.916667	0.92	1.34242	1.34	19	19	0	0	0	0	0	0	0	processed_transcript
CNTROB	3	57	12	2.72222	0.92	2.86094	1.04	46	9	3	0	0	0	0	0	0	5'utr
COCH	1	7	7	1	1	0.845098	0.85	7	7	1	0	0	0	0	0	0	5'utr
COL4A3BP	2	18	9	1.66667	0.83	1.74819	0.87	15	7.5	1	0	1	0	0	0	0	coding
COMT	2	37	18	1.40476	0.7	1.52288	0.76	26	13	2	0	0	0	0	0	0	5'utr
COPB1	1	38	38	0.921053	0.92	1.54407	1.54	15	15	1	0	0	0	0	0	0	5'utr
COPS3	1	15	15	0.733333	0.73	1.04139	1.04	9	9	1	0	0	0	0	0	0	5'utr
COPS5	1	7	7	1	1	0.845098	0.85	4	4	1	0	0	0	0	0	0	5'utr
COPS7B	1	10	10	0.9	0.9	0.653213	0.65	10	10	0	0	0	1	0	0	0	3'utr
CORO1A	8	135	14	6.96659	0.88	7.56706	0.93	110	13	2	1	4	0	1	0	0	5'utr
COTL1	1	10	10	0.8	0.8	0.90309	0.9	9	9	1	0	0	0	0	0	0	5'utr
COX16	1	26	26	1	1	1.41497	1.41	20	20	0	0	0	0	1	0	0	start_codon
COX17	2	24	12	1.75556	0.88	1.716	0.86	19	9.5	0	0	1	0	0	0	0	coding
COX4I1	1	52	52	0.826923	0.83	1.33244	1.33	39	39	0	0	0	0	0	0	0	5'utr-intron
COX5A	2	19	9	2	1	1.94448	0.97	17	8.5	1	0	0	0	1	0	0	start_codon
COX6B1	2	38	19	1.69188	0.85	1.80448	0.9	32	16	2	0	0	0	0	0	0	5'utr
COX6C	1	12	12	0.916667	0.92	1.04139	1.04	9	9	0	0	0	0	0	0	0	5'utr-intron
COX7A2	1	15	15	0.8	0.8	0.778151	0.78	14	14	0	0	1	0	0	0	0	coding
COX7B	1	9	9	0.777778	0.78	0.845098	0.85	7	7	1	0	0	0	0	0	0	5'utr
COX7C	2	92	46	1.52554	0.76	2.82672	1.41	62	31	1	0	0	0	1	0	0	5'utr
COX8A	2	24	12	1.55714	0.78	1.92428	0.96	18	9	1	0	0	0	1	0	0	5'utr
CPNE1	2	102	51	1.82323	0.91	2.69285	1.35	74	37	2	0	0	0	0	0	0	5'utr
CPOX	2	33	16	1.74176	0.87	1.83885	0.92	24	12	1	0	1	0	0	0	0	coding
CPSF2	2	40	20	2	1	2.60097	1.3	25	12.5	2	0	0	0	0	0	0	5'utr
CPSF7	1	8	8	0.875	0.88	0.845098	0.85	8	8	0	0	0	1	0	0	0	3'utr
CPT2	1	9	9	0.875	0.88	0.845098	0.85	8	8	0	0	0	0	1	0	0	start_codon
CPTP	1	15	15	1	1	1.17609	1.18	8	8	1	0	0	0	0	0	0	5'utr
CRAMP1L	4	41	10	3.50641	0.96	3.42943	0.87	32	7.5	0	1	2	1	0	0	0	intron
CRCP	1	13	13	0.923077	0.92	1.07918	1.08	11	11	0	0	0	1	0	0	0	3'utr
CREB1	1	16	16	0.9375	0.94	1.17609	1.18	16	16	0	0	0	0	0	0	0	5'utr-intron
CREB3L2	2	27	13	1.94118	0.97	1.90309	0.95	16	8	2	0	0	0	0	0	0	5'utr
CREBBP	7	427	29	5.58432	0.78	7.65335	0.85	143	19	6	0	1	0	0	0	0	coding
CREBZF	6	77	7	5.30357	0.87	5.29765	0.81	64	7	1	0	1	3	0	0	0	3'utr
CREM	1	7	7	0.857143	0.86	0.778151	0.78	7	7	1	0	0	0	0	0	0	5'utr
CRKL	4	434	46	3.65022	0.92	4.39019	0.99	186	31.5	3	0	0	1	0	0	0	5'utr
CRLS1	2	30	15	1.84211	0.92	1.76839	0.88	23	11.5	1	0	1	0	0	0	0	5'utr
CROCCP2	2	27	13	1.61667	0.81	1.76716	0.88	25	12.5	0	0	0	0	0	0	0	lincRNA_exon
CRY1	3	37	14	2.92857	1	2.86213	0.85	32	11	3	0	0	0	0	0	0	5'utr
CRYZL1	1	7	7	1	1	0.845098	0.85	6	6	1	0	0	0	0	0	0	5'utr
CS	1	9	9	1	1	0.954243	0.95	9	9	1	0	0	0	0	0	0	5'utr
CSDE1	2	29	14	1.72115	0.86	1.88649	0.94	24	12	0	0	0	1	0	0	0	3'utr
CSF1	2	19	9	1.90909	0.95	1.60206	0.8	15	7.5	0	0	0	2	0	0	0	3'utr
CSK	6	546	34	5.05373	0.85	7.38686	1.08	249	27.5	4	0	1	1	0	0	0	5'utr
CSNK1A1	4	154	35	3.70247	0.92	5.81803	1.46	97	23.5	4	0	0	0	0	0	0	5'utr
CSNK1A1P1	1	14	14	1	1	1.14613	1.15	2	2	0	0	0	0	0	0	0	processed_transcript
CSNK1D	6	63	8	5.13214	0.87	5.01365	0.85	56	7.5	0	2	0	4	0	0	0	3'utr
CSNK1G2	5	116	26	4.4216	0.88	4.99786	1.04	100	21	0	0	1	4	0	0	0	coding
CSNK1G3	1	16	16	0.9375	0.94	1.17609	1.18	14	14	1	0	0	0	0	0	0	5'utr
CSNK2A2	2	110	55	1.7219	0.86	2.10266	1.05	45	22.5	2	0	0	0	0	0	0	5'utr
CSRNP2	3	54	18	1.88889	0.56	2.80618	0.9	48	17	2	0	0	0	0	0	0	5'utr
CST3	1	11	11	0.909091	0.91	1	1	10	10	0	0	0	0	0	0	0	intron-5'utr
CSTB	1	12	12	1	1	1.07918	1.08	12	12	0	0	0	0	1	0	0	start_codon
CSTF1	1	30	30	0.933333	0.93	0.970037	0.97	27	27	0	0	0	0	0	0	0	5'utr-intron
CSTF3	1	20	20	0.85	0.85	0.929419	0.93	19	19	1	0	0	0	0	0	0	5'utr
CTAGE5	1	22	22	0.909091	0.91	1.30103	1.3	12	12	1	0	0	0	0	0	0	5'utr
CTBP1	38	532	11	32.6455	0.85	33.6302	0.89	468	11	2	17	12	3	1	0	0	3'utr
CTBP1-AS2	1	21	21	0.857143	0.86	1.25527	1.26	19	19	0	0	0	0	0	0	0	antisense
CTCF	5	101	15	4.63733	0.91	4.90613	0.92	61	12	2	0	1	1	0	1	0	5'utr
CTD-2006C1.2	1	9	9	1	1	0.954243	0.95	9	9	0	0	0	0	0	0	0	retained_intron
CTD-2132N18.3	1	7	7	1	1	0.845098	0.85	6	6	0	0	0	0	1	0	0	start_codon
CTD-2158P22.4	1	9	9	1	1	0.954243	0.95	5	5	0	0	0	0	0	0	0	processed_pseudogene
CTD-2207O23.3	1	8	8	0.75	0.75	0.778151	0.78	8	8	0	0	0	1	0	0	0	3'utr
CTD-2228K2.7	3	38	8	2.86957	1	2.74819	0.9	28	6	0	0	0	0	0	0	0	antisense
CTD-2287O16.1	1	9	9	0.555556	0.56	0.69897	0.7	8	8	0	0	0	0	0	0	0	processed_pseudogene
CTD-3014M21.1	1	9	9	1	1	0.954243	0.95	9	9	0	0	0	0	0	0	0	TEC
CTD-3222D19.8	1	8	8	1	1	0.90309	0.9	6	6	0	0	0	0	0	0	0	TEC
CTDNEP1	7	607	81	5.99605	0.86	8.17733	1.18	283	48	1	1	0	2	1	0	0	3'utr
CTDP1	1	12	12	0.833333	0.83	0.69897	0.7	12	12	0	0	1	0	0	0	0	coding
CTDSP1	1	11	11	0.909091	0.91	1	1	9	9	0	0	0	1	0	0	0	3'utr
CTDSP2	1	29	29	1	1	1.4624	1.46	10	10	1	0	0	0	0	0	0	5'utr
CTNNB1	2	65	32	1.70918	0.85	2.14922	1.07	37	18.5	2	0	0	0	0	0	0	5'utr
CTNS	1	10	10	1	1	1	1	6	6	1	0	0	0	0	0	0	5'utr
CTPS1	1	11	11	0.909091	0.91	0.69897	0.7	10	10	1	0	0	0	0	0	0	5'utr
CTSB	1	8	8	1	1	0.90309	0.9	8	8	1	0	0	0	0	0	0	5'utr
CTSC	1	9	9	0.777778	0.78	0.845098	0.85	9	9	0	0	1	0	0	0	0	coding
CTSD	1	7	7	0.571429	0.57	0.60206	0.6	7	7	0	0	0	1	0	0	0	3'utr
CTXN1	5	138	15	4.45909	0.95	5.55522	1.18	69	9	1	0	3	1	0	0	0	3'utr
CUL3	1	11	11	0.909091	0.91	1	1	8	8	1	0	0	0	0	0	0	5'utr
CUL4A	2	28	14	1.60963	0.8	1.77815	0.89	24	12	1	1	0	0	0	0	0	5'utr
CUTA	4	41	8	3.31746	0.87	3.23754	0.84	33	6.5	1	0	0	0	2	0	0	start_codon
CWC15	1	9	9	0.888889	0.89	0.60206	0.6	9	9	0	0	0	0	0	0	0	5'utr-intron
CXCR4	1	30	30	1	1	1.4624	1.46	15	15	0	0	0	0	1	0	0	start_codon
CXXC1	1	9	9	1	1	0.954243	0.95	7	7	1	0	0	0	0	0	0	5'utr
CXorf40A	1	8	8	1	1	0.90309	0.9	6	6	1	0	0	0	0	0	0	5'utr
CXorf40B	2	22	11	1.79048	0.9	1.92428	0.96	21	10.5	1	1	0	0	0	0	0	intron
CYB561A3	1	8	8	0.875	0.88	0.845098	0.85	6	6	0	0	0	1	0	0	0	3'utr
CYCS	2	82	41	1.70455	0.85	2.4014	1.2	48	24	2	0	0	0	0	0	0	5'utr
CYHR1	2	174	87	1.88935	0.94	2.9971	1.5	40	20	0	2	0	0	0	0	0	intron
CYP26B1	1	7	7	1	1	0.845098	0.85	4	4	0	0	0	1	0	0	0	3'utr
CYP2R1	1	9	9	1	1	0.954243	0.95	8	8	0	1	0	0	0	0	0	intron
CYSTM1	1	24	24	0.916667	0.92	1.04139	1.04	17	17	0	0	0	0	0	0	0	5'utr-intron
CYTH1	2	21	10	1.71429	0.86	1.5563	0.78	20	10	0	0	0	2	0	0	0	3'utr
CYTH2	1	7	7	0.714286	0.71	0.69897	0.7	7	7	0	1	0	0	0	0	0	intron
DAD1	2	27	13	1.88889	0.94	2.15836	1.08	26	13	0	0	1	0	1	0	0	coding
DAP3	1	31	31	0.967742	0.97	1.47712	1.48	13	13	0	0	0	0	0	0	0	intron-5'utr
DAPK3	2	23	11	1.73333	0.87	1.64345	0.82	23	11.5	0	0	0	2	0	0	0	3'utr
DARS2	3	30	10	2.75	1	2.5563	0.9	25	8	3	0	0	0	0	0	0	5'utr
DAXX	1	17	17	0.882353	0.88	1.17609	1.18	15	15	1	0	0	0	0	0	0	5'utr
DAZAP1	1	24	24	0.75	0.75	0.778151	0.78	21	21	1	0	0	0	0	0	0	5'utr
DAZAP2	1	12	12	1	1	1.07918	1.08	11	11	1	0	0	0	0	0	0	5'utr
DBF4	4	40	9	3.16537	0.79	3.49415	0.84	31	8	2	0	1	0	1	0	0	5'utr
DBF4B	1	8	8	1	1	0.90309	0.9	7	7	0	1	0	0	0	0	0	intron
DBI	1	9	9	0.888889	0.89	0.90309	0.9	6	6	1	0	0	0	0	0	0	5'utr
DBN1	1	13	13	1	1	1.11394	1.11	5	5	1	0	0	0	0	0	0	5'utr
DBR1	1	11	11	0.818182	0.82	0.954243	0.95	11	11	1	0	0	0	0	0	0	5'utr
DCAF12	4	69	16	3.6366	0.93	4.39515	1.17	53	12	4	0	0	0	0	0	0	5'utr
DCAF16	1	7	7	1	1	0.845098	0.85	7	7	1	0	0	0	0	0	0	5'utr
DCAF7	5	182	10	4.53452	0.91	5.3994	0.95	109	9	2	0	1	2	0	0	0	5'utr
DCAKD	1	9	9	1	1	0.954243	0.95	6	6	1	0	0	0	0	0	0	5'utr
DCLRE1B	1	7	7	1	1	0.845098	0.85	7	7	0	0	0	1	0	0	0	3'utr
DCP2	1	7	7	0.857143	0.86	0.778151	0.78	6	6	0	0	1	0	0	0	0	coding
DCTD	1	10	10	0.8	0.8	0.90309	0.9	10	10	0	0	0	0	1	0	0	start_codon
DCTN2	2	19	9	1.91667	0.96	1.88649	0.94	14	7	2	0	0	0	0	0	0	5'utr
DCTN5	2	28	14	1.57143	0.79	1.65321	0.83	28	14	0	0	0	1	1	0	0	start_codon
DCTPP1	1	11	11	0.818182	0.82	0.653213	0.65	11	11	0	0	1	0	0	0	0	coding
DCUN1D5	2	286	143	1.87987	0.94	2.71998	1.36	177	88.5	2	0	0	0	0	0	0	5'utr
DDA1	3	36	8	2.52381	0.86	2.52634	0.85	35	8	2	0	0	1	0	0	0	5'utr
DDAH2	1	27	27	1	1	1.43136	1.43	17	17	1	0	0	0	0	0	0	5'utr
DDIT4	4	50	12	3.26389	0.83	3.61962	0.89	47	11	1	0	0	3	0	0	0	5'utr
DDX1	1	7	7	0.857143	0.86	0.778151	0.78	7	7	1	0	0	0	0	0	0	5'utr
DDX24	1	9	9	1	1	0.954243	0.95	7	7	1	0	0	0	0	0	0	5'utr
DDX39B	4	53	11	3.61364	0.93	4.15728	1.05	46	11	2	1	0	0	1	0	0	intron
DDX3X	2	16	8	1.85714	0.93	1.73239	0.87	13	6.5	1	0	1	0	0	0	0	5'utr
DDX5	10	208	9	8.98449	0.9	9.77686	0.9	145	7.5	1	5	3	0	1	0	0	coding
DDX6	2	19	9	1.78409	0.89	1.8451	0.92	18	9	0	0	0	2	0	0	0	3'utr
DEAF1	4	103	24	3.60908	0.9	4.28179	1.07	76	20.5	4	0	0	0	0	0	0	5'utr
DEDD2	1	9	9	1	1	0.954243	0.95	8	8	0	0	1	0	0	0	0	coding
DENND4B	4	32	8	3.73214	0.94	3.48058	0.87	27	7	2	0	2	0	0	0	0	coding
DENND5A	1	17	17	0.823529	0.82	1.14613	1.15	9	9	1	0	0	0	0	0	0	5'utr
DERL1	2	40	20	1.93548	0.97	2.36549	1.18	30	15	2	0	0	0	0	0	0	5'utr
DESI2	1	55	55	0.781818	0.78	1.33244	1.33	39	39	0	0	0	0	0	0	0	processed_transcript
DEXI	4	56	12	3.72727	1	4.05843	1.02	39	7.5	4	0	0	0	0	0	0	5'utr
DFNB31	2	18	9	1.775	0.89	1.49831	0.75	16	8	2	0	0	0	0	0	0	5'utr
DGCR14	1	8	8	1	1	0.90309	0.9	7	7	0	0	0	1	0	0	0	3'utr
DGCR2	1	7	7	1	1	0.845098	0.85	6	6	1	0	0	0	0	0	0	5'utr
DGCR8	3	33	10	2.62308	0.9	2.33445	0.65	25	9	1	0	0	2	0	0	0	5'utr
DGKA	1	8	8	0.875	0.88	0.845098	0.85	8	8	0	0	1	0	0	0	0	coding
DGKD	1	8	8	1	1	0.90309	0.9	7	7	0	0	0	1	0	0	0	3'utr
DGUOK-AS1	1	7	7	1	1	0.845098	0.85	5	5	0	0	0	0	0	0	0	antisense
DHCR7	1	19	19	0.947368	0.95	1.25527	1.26	12	12	0	0	0	0	0	0	0	5'utr-intron
DHFR	1	8	8	0.857143	0.86	0.778151	0.78	6	6	1	0	0	0	0	0	0	5'utr
DHPS	1	7	7	1	1	0.845098	0.85	6	6	1	0	0	0	0	0	0	5'utr
DHRSX	1	12	12	0.833333	0.83	1	1	10	10	0	0	1	0	0	0	0	coding
DHX15	1	43	43	0.883721	0.88	1.10266	1.1	37	37	1	0	0	0	0	0	0	5'utr
DHX30	2	22	11	1.73504	0.87	1.94448	0.97	20	10	0	0	2	0	0	0	0	coding
DIAPH1	7	94	12	5.46771	0.82	6.18469	0.9	77	11	1	0	1	5	0	0	0	3'utr
DIDO1	9	150	13	7.92874	0.86	9.2221	1	84	9	0	0	8	1	0	0	0	3'utr
DIMT1	1	12	12	0.833333	0.83	1	1	8	8	1	0	0	0	0	0	0	5'utr
DISC1FP1	3	25	8	2.13929	0.71	2.30103	0.7	23	8	0	0	0	0	0	0	0	lincRNA_intron
DKC1	1	23	23	0.913043	0.91	1.32222	1.32	17	17	1	0	0	0	0	0	0	5'utr
DLG1	2	67	33	1.73262	0.87	2.62325	1.31	53	26.5	0	2	0	0	0	0	0	intron
DLG2	1	8	8	0.75	0.75	0.778151	0.78	6	6	0	1	0	0	0	0	0	intron
DLG4	1	10	10	0.7	0.7	0.845098	0.85	7	7	0	0	0	1	0	0	0	3'utr
DLGAP1-AS1	1	11	11	0.909091	0.91	1	1	9	9	0	0	0	0	0	0	0	antisense
DLGAP4	1	11	11	1	1	1.04139	1.04	5	5	1	0	0	0	0	0	0	5'utr
DLGAP5	1	10	10	0.9	0.9	0.954243	0.95	8	8	1	0	0	0	0	0	0	5'utr
DMC1	1	9	9	0.666667	0.67	0.778151	0.78	8	8	1	0	0	0	0	0	0	5'utr
DMPK	10	121	12	8.68737	0.88	9.02872	0.9	102	10.5	0	0	7	1	0	0	0	3'utr
DMTF1	1	8	8	1	1	0.90309	0.9	8	8	1	0	0	0	0	0	0	5'utr
DMWD	1	10	10	1	1	1	1	9	9	0	0	0	1	0	0	0	3'utr
DMXL1	2	30	15	1.72671	0.86	2.07918	1.04	23	11.5	0	0	0	0	0	0	0	processed_transcript
DNAJA1	1	97	97	0.907216	0.91	1.34242	1.34	51	51	1	0	0	0	0	0	0	5'utr
DNAJA3	1	10	10	0.9	0.9	0.653213	0.65	7	7	0	0	0	0	1	0	0	start_codon
DNAJB11	2	35	17	1.87319	0.94	2.08279	1.04	21	10.5	2	0	0	0	0	0	0	5'utr
DNAJB2	1	9	9	0.888889	0.89	0.90309	0.9	9	9	0	0	0	1	0	0	0	3'utr
DNAJC10	1	17	17	0.882353	0.88	1.17609	1.18	8	8	1	0	0	0	0	0	0	5'utr
DNAJC19	2	19	9	1.54762	0.77	1.69897	0.85	18	9	2	0	0	0	0	0	0	5'utr
DNAJC21	1	47	47	0.787234	0.79	0.966142	0.97	29	29	1	0	0	0	0	0	0	5'utr
DNAJC5	4	58	14	3.57792	0.93	3.902	0.94	48	11	1	0	1	2	0	0	0	5'utr
DNAJC8	1	11	11	0.818182	0.82	0.954243	0.95	9	9	0	0	0	0	1	0	0	start_codon
DNAJC9	1	21	21	0.666667	0.67	0.845098	0.85	16	16	0	0	0	0	1	0	0	start_codon
DNASE1	6	70	9	5.35437	0.89	5.32361	0.87	60	8.5	1	0	1	3	0	0	0	nonsense_mediated_decay
DNTTIP1	1	8	8	1	1	0.90309	0.9	8	8	1	0	0	0	0	0	0	5'utr
DOHH	5	90	13	4.43384	0.88	5.10897	1	65	13	1	0	0	3	0	0	0	3'utr
DPAGT1	3	39	12	2.82237	0.95	3.17955	1.08	25	8	3	0	0	0	0	0	0	5'utr
DPM2	1	8	8	1	1	0.90309	0.9	5	5	1	0	0	0	0	0	0	5'utr
DPP8	1	22	22	1	1	1.34242	1.34	19	19	1	0	0	0	0	0	0	5'utr
DPP9	1	10	10	0.8	0.8	0.60206	0.6	10	10	1	0	0	0	0	0	0	5'utr
DPY19L3	1	14	14	1	1	1.14613	1.15	8	8	1	0	0	0	0	0	0	5'utr
DPY30	1	7	7	0.857143	0.86	0.778151	0.78	6	6	1	0	0	0	0	0	0	5'utr
DR1	7	192	25	5.6591	0.86	6.75337	0.9	143	16	6	0	0	0	0	0	0	5'utr
DRAP1	1	9	9	1	1	0.954243	0.95	7	7	1	0	0	0	0	0	0	5'utr
DSN1	1	29	29	0.931034	0.93	1.43136	1.43	17	17	1	0	0	0	0	0	0	5'utr
DSTN	1	7	7	1	1	0.845098	0.85	7	7	1	0	0	0	0	0	0	5'utr
DTL	1	11	11	0.909091	0.91	0.69897	0.7	9	9	1	0	0	0	0	0	0	5'utr
DTNBP1	2	49	24	1.71207	0.86	1.85024	0.93	38	19	2	0	0	0	0	0	0	5'utr
DUS3L	1	8	8	1	1	0.90309	0.9	7	7	0	0	0	0	0	1	0	stop_codon
DUSP11	1	8	8	0.875	0.88	0.845098	0.85	8	8	0	0	1	0	0	0	0	coding
DUSP2	14	2070	45	11.6516	0.84	17.2584	1.25	1095	35.5	1	0	8	3	1	1	0	3'utr
DUSP4	1	9	9	1	1	0.954243	0.95	9	9	1	0	0	0	0	0	0	5'utr
DUSP5	2	63	31	1.79938	0.9	2.11115	1.06	48	24	2	0	0	0	0	0	0	5'utr
DUT	2	20	10	1.79167	0.9	1.58546	0.79	15	7.5	2	0	0	0	0	0	0	5'utr
DVL3	1	9	9	0.777778	0.78	0.845098	0.85	8	8	1	0	0	0	0	0	0	5'utr
DYNLL1	1	14	14	0.928571	0.93	1.11394	1.11	13	13	1	0	0	0	0	0	0	5'utr
DYNLL2	3	47	16	2.55909	0.9	3.33445	1.08	37	12	2	0	0	1	0	0	0	5'utr
DYRK1A	10	972	21	8.62963	0.88	11.1489	1.22	373	17.5	1	0	0	2	0	0	0	processed_transcript
DYRK3	2	24	12	1.75556	0.88	1.716	0.86	22	11	1	0	0	0	1	0	0	5'utr
E2F1	1	7	7	0.857143	0.86	0.778151	0.78	7	7	0	0	0	1	0	0	0	3'utr
E2F2	7	200	22	6.00894	0.87	7.79377	1.08	149	18	4	0	0	3	0	0	0	3'utr
E2F3	2	15	7	1.71429	0.86	1.60206	0.8	15	7.5	1	1	0	0	0	0	0	5'utr
E2F6	1	14	14	0.785714	0.79	1.04139	1.04	12	12	1	0	0	0	0	0	0	5'utr
EAF1	2	25	12	1.73333	0.87	2.04139	1.02	23	11.5	2	0	0	0	0	0	0	5'utr
EBNA1BP2	1	11	11	1	1	1.04139	1.04	11	11	0	1	0	0	0	0	0	intron
ECD	1	7	7	0.857143	0.86	0.778151	0.78	4	4	1	0	0	0	0	0	0	5'utr
ECSIT	2	17	8	1.65278	0.83	1.6902	0.85	17	8.5	1	0	1	0	0	0	0	coding
EDC3	2	57	28	1.65714	0.83	2.07918	1.04	50	25	1	0	0	1	0	0	0	3'utr
EDC4	2	27	13	1.8	0.9	2.13354	1.07	26	13	2	0	0	0	0	0	0	5'utr
EDEM1	7	82	12	6.03814	0.88	5.70783	0.85	79	12	1	0	2	4	0	0	0	5'utr
EED	2	28	14	1.80952	0.9	2.07918	1.04	22	11	2	0	0	0	0	0	0	5'utr
EEF1B2	1	9	9	0.888889	0.89	0.90309	0.9	8	8	0	0	0	0	0	0	0	intron-5'utr
EEF1D	3	38	13	2.94444	1	3.18949	1.11	27	7	3	0	0	0	0	0	0	5'utr
EEF2	5	81	16	4.05062	0.71	4.69024	0.95	55	9	1	0	2	2	0	0	0	3'utr
EFHD2	5	68	9	4.24882	0.88	4.64195	0.85	63	9	0	0	0	5	0	0	0	3'utr
EFNB1	4	42	9	3.65546	0.9	3.80182	0.91	32	6.5	4	0	0	0	0	0	0	5'utr
EGLN2	3	32	11	2.90909	1	3.01703	1	26	9	1	0	0	1	1	0	0	5'utr
EGR1	21	2304	20	18.1716	0.88	23.0117	0.95	648	16	2	0	9	10	0	0	0	5'utr
EID1	1	15	15	1	1	1.17609	1.18	11	11	0	0	0	1	0	0	0	3'utr
EIF1	6	597	22	4.87316	0.81	6.51407	1.02	299	22	0	0	1	3	0	0	0	processed_transcript
EIF1AD	3	45	13	3	1	3.45637	1.11	38	12	1	0	0	0	0	0	0	intron-5'utr
EIF1B	2	51	25	1.78198	0.89	2.13513	1.07	26	13	2	0	0	0	0	0	0	5'utr
EIF1P3	1	7	7	0.857143	0.86	0.778151	0.78	7	7	0	0	0	0	0	0	0	processed_pseudogene
EIF1P5	1	8	8	0.75	0.75	0.778151	0.78	8	8	0	0	0	0	0	0	0	unprocessed_pseudogene
EIF1P7	1	7	7	0.714286	0.71	0.69897	0.7	6	6	0	0	0	0	0	0	0	processed_pseudogene
EIF2AK3	1	8	8	0.875	0.88	0.845098	0.85	8	8	0	0	1	0	0	0	0	coding
EIF2S1	1	34	34	0.970588	0.97	1.51851	1.52	22	22	1	0	0	0	0	0	0	5'utr
EIF3A	2	26	13	1.71895	0.86	1.74819	0.87	16	8	1	0	1	0	0	0	0	coding
EIF3B	1	8	8	1	1	0.90309	0.9	6	6	0	0	1	0	0	0	0	coding
EIF3C	1	9	9	1	1	0.954243	0.95	4	4	1	0	0	0	0	0	0	5'utr
EIF3D	1	9	9	0.888889	0.89	0.60206	0.6	9	9	1	0	0	0	0	0	0	5'utr
EIF3G	1	11	11	0.727273	0.73	0.90309	0.9	10	10	1	0	0	0	0	0	0	5'utr
EIF3J	1	15	15	0.533333	0.53	0.90309	0.9	10	10	0	0	1	0	0	0	0	coding
EIF3M	1	9	9	0.777778	0.78	0.845098	0.85	9	9	1	0	0	0	0	0	0	5'utr
EIF4A1	1	7	7	0.857143	0.86	0.778151	0.78	7	7	0	0	0	1	0	0	0	3'utr
EIF4A3	1	110	110	0.909091	0.91	1.52288	1.52	51	51	1	0	0	0	0	0	0	5'utr
EIF4EBP2	1	7	7	1	1	0.845098	0.85	7	7	0	0	0	1	0	0	0	3'utr
EIF4G1	3	163	59	2.67677	0.9	3.48316	1.08	93	40	1	0	1	0	0	1	0	5'utr
EIF4G2	10	248	12	8.3837	0.88	9.58737	0.95	187	10.5	2	0	4	2	0	0	0	3'utr
EIF4G3	3	111	30	2.48443	0.93	3.97336	1.48	53	11	1	2	0	0	0	0	0	intron
EIF4H	3	53	20	2.40217	0.85	3.05975	0.95	52	19	0	0	0	3	0	0	0	3'utr
EIF5	2	126	63	1.80672	0.9	2.04922	1.02	89	44.5	0	0	1	0	0	0	0	intron-5'utr
EIF5A	6	485	21	5.29992	0.87	7.60676	1.26	254	15.5	1	0	0	5	0	0	0	5'utr
EIF5AL1	3	100	22	2.52635	0.77	3.20172	1.02	58	16	1	0	0	2	0	0	0	5'utr
EIF6	2	44	22	1.77059	0.89	2.12057	1.06	29	14.5	0	0	1	1	0	0	0	3'utr
ELAVL1	2	24	12	1.82857	0.91	1.76716	0.88	20	10	1	0	0	1	0	0	0	3'utr
ELF1	4	141	19	2.86723	0.72	3.22531	0.81	67	14	0	1	0	1	1	0	0	3'utr
ELF2	1	8	8	1	1	0.90309	0.9	6	6	1	0	0	0	0	0	0	5'utr
ELMSAN1	5	54	7	4.28509	0.9	4.22094	0.85	38	7	4	0	0	1	0	0	0	3'utr
ELOVL4	1	9	9	0.777778	0.78	0.845098	0.85	9	9	1	0	0	0	0	0	0	5'utr
ELOVL5	2	80	40	1.74755	0.87	1.989	0.99	43	21.5	2	0	0	0	0	0	0	5'utr
ELP5	1	7	7	1	1	0.845098	0.85	7	7	1	0	0	0	0	0	0	5'utr
EMB	1	9	9	0.888889	0.89	0.90309	0.9	6	6	1	0	0	0	0	0	0	5'utr
EMC3	1	9	9	0.888889	0.89	0.60206	0.6	8	8	0	0	0	0	1	0	0	start_codon
EMC3-AS1	1	7	7	0.857143	0.86	0.778151	0.78	6	6	0	0	0	0	0	0	0	processed_transcript
EMC4	1	24	24	0.916667	0.92	1.04139	1.04	19	19	1	0	0	0	0	0	0	5'utr
EMC8	2	103	51	1.80361	0.9	2.8293	1.41	70	35	2	0	0	0	0	0	0	5'utr
EMD	1	9	9	1	1	0.954243	0.95	7	7	1	0	0	0	0	0	0	5'utr
EML3	1	14	14	1	1	1.14613	1.15	10	10	1	0	0	0	0	0	0	5'utr
EMP3	2	31	15	1.63095	0.82	2.04139	1.02	24	12	1	0	1	0	0	0	0	5'utr
ENDOG	2	16	8	1.77778	0.89	1.6902	0.85	14	7	1	0	1	0	0	0	0	5'utr
ENKD1	1	7	7	0.714286	0.71	0.69897	0.7	6	6	1	0	0	0	0	0	0	5'utr
ENO1	5	218	10	4.69001	0.92	5.21048	1	135	9	0	0	1	3	0	0	0	3'utr
ENOPH1	1	19	19	0.789474	0.79	0.69897	0.7	15	15	1	0	0	0	0	0	0	5'utr
ENSA	2	39	19	1.37097	0.69	1.73239	0.87	20	10	0	0	0	1	1	0	0	3'utr
ENY2	1	11	11	1	1	1.04139	1.04	9	9	1	0	0	0	0	0	0	5'utr
EP300	7	328	40	5.90006	0.83	7.45909	1.11	228	22	6	0	1	0	0	0	0	5'utr
EP400NL	1	7	7	1	1	0.845098	0.85	6	6	0	0	0	0	0	0	0	5'utr-intron
EPC1	1	23	23	1	1	1.36173	1.36	3	3	1	0	0	0	0	0	0	5'utr
EPDR1	2	19	9	1.68889	0.84	1.50515	0.75	19	9.5	1	0	1	0	0	0	0	5'utr
EPN1	1	16	16	0.5625	0.56	0.653213	0.65	13	13	1	0	0	0	0	0	0	5'utr
ERF	5	63	9	4.42603	0.89	4.02979	0.78	55	9	0	0	2	3	0	0	0	3'utr
ERH	2	51	25	1.72778	0.86	2.12818	1.06	41	20.5	1	0	0	1	0	0	0	3'utr
ERO1LB	1	16	16	0.875	0.88	1.14613	1.15	10	10	1	0	0	0	0	0	0	5'utr
ERVK3-1	2	35	17	1.87319	0.94	2.08279	1.04	20	10	0	0	0	0	0	0	0	lincRNA_exon
ESYT2	1	32	32	0.9375	0.94	1.47712	1.48	10	10	0	0	0	0	0	0	0	intron-coding
ETNK1	2	48	24	1.87831	0.94	2.69897	1.35	36	18	0	0	2	0	0	0	0	coding
ETS1	5	91	11	4.41546	0.9	4.82053	0.78	64	11	2	0	0	3	0	0	0	3'utr
ETS2	1	12	12	1	1	1.07918	1.08	10	10	0	0	0	0	0	0	0	intron-5'utr
EVL	2	25	12	1.46032	0.73	1.80618	0.9	19	9.5	2	0	0	0	0	0	0	5'utr
EXO1	2	45	22	2	1	2.51055	1.26	23	11.5	2	0	0	0	0	0	0	5'utr
EXOC7	5	49	10	4.33834	0.89	4.58973	0.95	45	9	0	0	0	5	0	0	0	3'utr
EXOSC3	3	31	9	2.92857	1	2.97128	0.95	28	8	0	0	3	0	0	0	0	coding
EXOSC4	1	8	8	0.875	0.88	0.845098	0.85	7	7	0	0	1	0	0	0	0	coding
EXOSC6	2	48	24	1.70085	0.85	2.10037	1.05	31	15.5	0	0	2	0	0	0	0	coding
EXT2	1	9	9	0.777778	0.78	0.845098	0.85	8	8	1	0	0	0	0	0	0	5'utr
EXTL3	2	18	9	1.675	0.84	1.44716	0.72	17	8.5	0	0	1	1	0	0	0	coding
EZH2	1	7	7	0.857143	0.86	0.778151	0.78	5	5	0	0	0	0	0	0	0	nonsense_mediated_decay
FABP5	1	11	11	0.636364	0.64	0.845098	0.85	7	7	1	0	0	0	0	0	0	5'utr
FADD	3	48	10	2.31667	0.77	2.74194	0.78	33	10	1	0	0	2	0	0	0	5'utr
FADS2	13	358	21	11.075	0.85	14.3437	1.03	261	19	4	0	0	9	0	0	0	5'utr
FAF2	1	8	8	0.875	0.88	0.845098	0.85	8	8	1	0	0	0	0	0	0	5'utr
FAM101A	1	15	15	0.933333	0.93	1.14613	1.15	11	11	1	0	0	0	0	0	0	5'utr
FAM102A	2	34	17	1.84211	0.92	2.07918	1.04	24	12	0	0	0	2	0	0	0	3'utr
FAM102B	1	13	13	0.923077	0.92	1.07918	1.08	11	11	1	0	0	0	0	0	0	5'utr
FAM104A	1	8	8	1	1	0.90309	0.9	7	7	0	0	1	0	0	0	0	coding
FAM111A	2	15	7	1.73214	0.87	1.62325	0.81	14	7	2	0	0	0	0	0	0	5'utr
FAM111B	1	12	12	0.916667	0.92	1.04139	1.04	12	12	1	0	0	0	0	0	0	5'utr
FAM120AOS	2	29	14	1.68889	0.84	2.10721	1.05	16	8	0	2	0	0	0	0	0	intron
FAM122B	2	15	7	1.85714	0.93	1.68124	0.84	14	7	2	0	0	0	0	0	0	5'utr
FAM133B	1	48	48	0.979167	0.98	1.6721	1.67	24	24	1	0	0	0	0	0	0	5'utr
FAM134A	1	22	22	0.727273	0.73	0.90309	0.9	17	17	1	0	0	0	0	0	0	5'utr
FAM13B	1	12	12	1	1	1.07918	1.08	10	10	1	0	0	0	0	0	0	5'utr
FAM160A2	1	9	9	0.777778	0.78	0.845098	0.85	9	9	0	0	1	0	0	0	0	coding
FAM160B1	1	34	34	0.911765	0.91	1.49136	1.49	12	12	1	0	0	0	0	0	0	5'utr
FAM160B2	1	8	8	0.875	0.88	0.845098	0.85	8	8	0	0	0	1	0	0	0	3'utr
FAM162A	1	8	8	1	1	0.90309	0.9	7	7	1	0	0	0	0	0	0	5'utr
FAM168A	1	52	52	0.980769	0.98	1.40654	1.41	24	24	1	0	0	0	0	0	0	5'utr
FAM168B	19	353	12	16.0341	0.86	17.9506	0.9	283	9	2	1	1	14	0	0	0	3'utr
FAM177A1	1	7	7	1	1	0.845098	0.85	7	7	0	0	0	0	1	0	0	start_codon
FAM192A	1	15	15	0.866667	0.87	0.812913	0.81	15	15	0	0	0	0	0	0	0	5'utr-intron
FAM195B	2	17	8	1.37143	0.69	1.50515	0.75	16	8	0	0	0	2	0	0	0	3'utr
FAM199X	1	7	7	1	1	0.845098	0.85	5	5	1	0	0	0	0	0	0	5'utr
FAM200B	1	10	10	0.9	0.9	0.954243	0.95	7	7	1	0	0	0	0	0	0	5'utr
FAM208B	4	82	17	3.52422	0.91	3.68699	0.9	58	13	4	0	0	0	0	0	0	5'utr
FAM20B	1	20	20	0.85	0.85	1.23045	1.23	15	15	1	0	0	0	0	0	0	5'utr
FAM210A	1	34	34	0.882353	0.88	1.47712	1.48	29	29	1	0	0	0	0	0	0	5'utr
FAM217B	1	17	17	1	1	1.23045	1.23	7	7	1	0	0	0	0	0	0	5'utr
FAM219A	2	23	11	2	1	2.04922	1.02	17	8.5	2	0	0	0	0	0	0	5'utr
FAM220A	1	13	13	1	1	1.11394	1.11	12	12	1	0	0	0	0	0	0	5'utr
FAM24B	1	7	7	0.857143	0.86	0.778151	0.78	7	7	1	0	0	0	0	0	0	5'utr
FAM35DP	2	45	22	1.90323	0.95	2.29226	1.15	25	12.5	0	0	0	0	0	0	0	unprocessed_pseudogene
FAM3A	1	13	13	0.692308	0.69	0.653213	0.65	9	9	1	0	0	0	0	0	0	5'utr
FAM49B	2	100	50	1.85417	0.93	2.46052	1.23	51	25.5	2	0	0	0	0	0	0	5'utr
FAM53B	10	95	8	8.44132	0.86	8.32487	0.85	90	8	0	0	1	9	0	0	0	3'utr
FAM60A	1	21	21	0.904762	0.9	1.27875	1.28	17	17	1	0	0	0	0	0	0	5'utr
FAM72A	4	35	8	3.875	1	3.70243	0.93	30	7.5	4	0	0	0	0	0	0	5'utr
FAM72C	1	11	11	0.909091	0.91	0.69897	0.7	9	9	1	0	0	0	0	0	0	5'utr
FAM72D	4	60	14	3.33846	0.9	3.98686	0.94	34	9	4	0	0	0	0	0	0	5'utr
FAM83H	9	86	10	7.80065	0.88	8.12422	0.85	78	8	1	1	3	4	0	0	0	3'utr
FAM89B	1	7	7	0.857143	0.86	0.778151	0.78	7	7	0	0	1	0	0	0	0	coding
FAM96A	1	11	11	0.909091	0.91	0.69897	0.7	10	10	0	0	1	0	0	0	0	coding
FAM96B	3	72	29	2.6863	0.9	3.43201	1.08	66	25	0	0	1	0	1	1	0	coding
FAM98C	1	11	11	1	1	1.04139	1.04	6	6	0	1	0	0	0	0	0	intron
FANCG	1	11	11	0.909091	0.91	1	1	8	8	1	0	0	0	0	0	0	5'utr
FARSA	1	7	7	0.714286	0.71	0.69897	0.7	7	7	0	0	0	0	1	0	0	start_codon
FAT1	3	32	8	2.69853	0.88	2.53529	0.85	23	7	0	0	1	2	0	0	0	3'utr
FAU	1	310	310	0.896774	0.9	1.59895	1.6	40	40	1	0	0	0	0	0	0	5'utr
FBL	1	18	18	1	1	1.25527	1.26	13	13	1	0	0	0	0	0	0	5'utr
FBRS	8	141	12	7.28502	0.89	7.42865	0.9	105	9	4	0	3	1	0	0	0	5'utr
FBRSL1	6	56	9	5.21956	0.87	5.37683	0.9	51	9	1	2	2	0	0	1	0	5'utr
FBXL12	1	19	19	0.894737	0.89	0.929419	0.93	12	12	1	0	0	0	0	0	0	5'utr
FBXL14	3	40	8	2.67429	0.96	2.98227	0.9	28	7	0	1	2	0	0	0	0	intron
FBXL18	1	19	19	1	1	1.27875	1.28	9	9	0	0	0	0	0	0	0	nonsense_mediated_decay
FBXL19	14	243	10	12.1547	0.87	13.1243	0.9	206	9.5	3	0	4	7	0	0	0	5'utr
FBXL3	2	59	29	1.83103	0.92	2.5617	1.28	37	18.5	2	0	0	0	0	0	0	5'utr
FBXO30	1	7	7	0.857143	0.86	0.778151	0.78	7	7	1	0	0	0	0	0	0	5'utr
FBXO31	1	8	8	0.875	0.88	0.845098	0.85	7	7	0	0	0	1	0	0	0	3'utr
FBXO34	1	14	14	1	1	1.14613	1.15	9	9	0	0	0	0	0	0	0	5'utr-intron
FBXO41	6	51	8	5.67778	0.95	5.11067	0.9	48	8	1	0	2	2	1	0	0	3'utr
FBXO45	4	57	15	3.6	0.9	3.48058	0.79	39	9	3	0	1	0	0	0	0	5'utr
FBXO46	2	14	7	1.85714	0.93	1.62325	0.81	11	5.5	0	0	2	0	0	0	0	coding
FBXO5	2	25	12	1.9375	0.97	2.13033	1.07	18	9	0	1	0	0	1	0	0	start_codon
FBXO7	2	41	20	1.86774	0.93	2.43136	1.22	38	19	1	0	0	0	1	0	0	5'utr
FBXW2	4	37	7	3.05357	0.74	2.92428	0.74	33	7	0	1	0	3	0	0	0	3'utr
FBXW5	2	17	8	1.61429	0.81	1.65321	0.83	15	7.5	0	1	0	1	0	0	0	3'utr
FBXW7	5	111	12	3.98508	0.86	4.6931	0.95	86	8	5	0	0	0	0	0	0	5'utr
FCGBP	2	15	7	1.875	0.94	1.6902	0.85	13	6.5	0	0	2	0	0	0	0	coding
FCHO2	1	9	9	0.777778	0.78	0.845098	0.85	9	9	0	1	0	0	0	0	0	intron
FDFT1	1	34	34	0.941176	0.94	1.50515	1.51	24	24	0	0	0	0	0	0	0	intron-5'utr
FDPS	1	7	7	1	1	0.845098	0.85	7	7	1	0	0	0	0	0	0	5'utr
FDX1	1	10	10	0.8	0.8	0.60206	0.6	9	9	1	0	0	0	0	0	0	5'utr
FDX1L	1	9	9	0.888889	0.89	0.90309	0.9	9	9	0	0	1	0	0	0	0	coding
FEM1A	8	103	11	7.16131	0.9	7.65522	0.92	80	8.5	1	0	2	4	1	0	0	5'utr
FEM1B	6	127	14	5.49583	0.93	6.35484	1.01	102	9	6	0	0	0	0	0	0	5'utr
FEN1	2	17	8	2	1	1.8451	0.92	15	7.5	2	0	0	0	0	0	0	5'utr
FGD5-AS1	2	15	7	1.875	0.94	1.6902	0.85	13	6.5	0	0	0	0	0	0	0	antisense
FGFR1OP2	3	61	8	2.84444	1	3.38596	0.9	47	8	2	0	0	1	0	0	0	5'utr
FIP1L1	1	29	29	0.862069	0.86	1.09691	1.1	24	24	1	0	0	0	0	0	0	5'utr
FIS1	4	40	10	3.64413	0.9	3.48855	0.87	33	7.5	1	0	1	0	0	0	0	processed_transcript
FIZ1	4	54	11	3.41061	0.84	3.40654	0.85	41	10	0	0	2	2	0	0	0	3'utr
FKBP1A	1	24	24	0.875	0.88	1.02119	1.02	16	16	0	0	0	0	1	0	0	start_codon
FKBP4	2	15	7	1.85714	0.93	1.68124	0.84	13	6.5	1	0	0	1	0	0	0	5'utr
FKBP7	1	8	8	0.875	0.88	0.845098	0.85	6	6	0	0	0	0	0	0	0	processed_transcript
FKBP8	1	7	7	0.571429	0.57	0.60206	0.6	7	7	1	0	0	0	0	0	0	5'utr
FLAD1	1	7	7	1	1	0.845098	0.85	6	6	0	0	0	0	0	0	0	processed_transcript
FLCN	2	35	17	1.67857	0.84	1.83885	0.92	24	12	2	0	0	0	0	0	0	5'utr
FLI1	1	7	7	1	1	0.845098	0.85	4	4	1	0	0	0	0	0	0	5'utr
FLJ31306	2	39	19	1.93548	0.97	2.06446	1.03	33	16.5	0	0	0	0	0	0	0	antisense
FLNA	11	118	10	9.59045	0.88	9.51568	0.85	100	8	0	0	9	2	0	0	0	3'utr
FLOT1	1	10	10	0.9	0.9	0.954243	0.95	8	8	1	0	0	0	0	0	0	5'utr
FLT1	2	33	16	1.875	0.94	2.24304	1.12	19	9.5	2	0	0	0	0	0	0	5'utr
FLVCR1	1	7	7	0.714286	0.71	0.69897	0.7	7	7	1	0	0	0	0	0	0	5'utr
FLYWCH1	1	12	12	0.916667	0.92	1.04139	1.04	10	10	0	0	0	1	0	0	0	3'utr
FLYWCH2	2	38	19	1.875	0.94	2.18752	1.09	21	10.5	1	0	0	0	0	0	0	5'utr
FMNL1	3	64	22	2.35065	0.86	2.79934	0.85	50	16	2	0	0	1	0	0	0	5'utr
FMNL3	1	12	12	0.75	0.75	0.653213	0.65	10	10	1	0	0	0	0	0	0	5'utr
FNBP1	2	35	17	1.78571	0.89	2.18752	1.09	27	13.5	1	0	0	0	1	0	0	start_codon
FNBP1P1	1	12	12	0.916667	0.92	1.04139	1.04	9	9	0	0	0	0	0	0	0	processed_pseudogene
FOSL2	2	17	8	1.77778	0.89	1.74819	0.87	15	7.5	1	0	0	1	0	0	0	5'utr
FOXJ2	4	79	12	3.88889	0.98	4.43281	1.07	57	10	4	0	0	0	0	0	0	5'utr
FOXJ3	1	41	41	0.878049	0.88	1.5563	1.56	36	36	1	0	0	0	0	0	0	5'utr
FOXK1	20	239	10	16.8429	0.83	17.8692	0.87	225	10	0	0	1	19	0	0	0	coding
FOXK2	4	103	26	3.20999	0.8	3.443	0.82	67	16	2	0	0	1	0	0	0	5'utr
FOXO3	2	31	15	1.7375	0.87	2.25527	1.13	24	12	2	0	0	0	0	0	0	5'utr
FOXP4	2	23	11	1.875	0.94	1.6902	0.85	20	10	2	0	0	0	0	0	0	5'utr
FOXRED2	1	8	8	0.875	0.88	0.845098	0.85	8	8	0	0	1	0	0	0	0	coding
FRA10AC1	2	27	13	1.95	0.98	2.12385	1.06	22	11	1	0	0	0	0	0	0	5'utr-intron
FRG1	1	37	37	0.945946	0.95	1.54407	1.54	26	26	1	0	0	0	0	0	0	5'utr
FRMD8	8	116	13	6.73213	0.84	7.78398	0.98	91	11.5	1	0	1	6	0	0	0	5'utr
FSD1L	1	9	9	1	1	0.954243	0.95	9	9	1	0	0	0	0	0	0	5'utr
FTH1	2	102	51	1.8806	0.94	3.01389	1.51	41	20.5	1	0	0	0	0	0	0	5'utr-intron
FTH1P10	1	32	32	1	1	1.50515	1.51	3	3	0	0	0	0	0	0	0	processed_transcript
FTL	1	7	7	1	1	0.845098	0.85	6	6	1	0	0	0	0	0	0	5'utr
FTSJ2	1	9	9	1	1	0.954243	0.95	7	7	0	0	1	0	0	0	0	coding
FUBP1	1	7	7	1	1	0.845098	0.85	5	5	0	0	1	0	0	0	0	coding
FUBP3	1	16	16	0.5625	0.56	0.954243	0.95	14	14	0	0	0	0	1	0	0	start_codon
FUS	6	120	19	4.24356	0.74	5.43933	0.9	94	16.5	0	0	5	0	0	0	0	coding
FUT4	1	8	8	0.75	0.75	0.778151	0.78	8	8	0	0	1	0	0	0	0	coding
FUT8	2	17	8	2	1	1.8451	0.92	17	8.5	0	2	0	0	0	0	0	intron
FUZ	1	7	7	1	1	0.845098	0.85	5	5	0	0	1	0	0	0	0	coding
FXR2	1	9	9	0.888889	0.89	0.90309	0.9	5	5	0	0	0	1	0	0	0	3'utr
FXYD5	2	16	8	1.88889	0.94	1.44716	0.72	12	6	2	0	0	0	0	0	0	5'utr
FYN	7	481	21	5.1802	0.71	6.94543	0.85	232	20	5	0	1	0	1	0	0	coding
FZD2	1	12	12	0.916667	0.92	1.04139	1.04	10	10	1	0	0	0	0	0	0	5'utr
FZR1	4	53	10	3.21167	0.83	3.88024	0.91	36	7.5	1	0	0	3	0	0	0	5'utr
G2E3	1	12	12	0.833333	0.83	0.69897	0.7	10	10	1	0	0	0	0	0	0	5'utr
G3BP1	3	38	11	3	1	3.22324	1.04	36	11	0	0	2	0	0	0	0	5'utr-intron
G3BP2	4	120	20	3.67355	0.91	5.02488	1.2	83	13	2	1	0	1	0	0	0	3'utr
GABARAPL1	2	34	17	1.84889	0.92	1.68124	0.84	30	15	1	0	0	0	0	0	0	5'utr-intron
GABARAPL2	1	28	28	0.964286	0.96	1.43136	1.43	18	18	1	0	0	0	0	0	0	5'utr
GABPA	1	7	7	0.714286	0.71	0.69897	0.7	6	6	0	0	0	0	0	0	0	5'utr-intron
GABPB1	1	34	34	0.882353	0.88	1	1	18	18	1	0	0	0	0	0	0	5'utr
GADD45A	1	8	8	0.75	0.75	0.778151	0.78	8	8	1	0	0	0	0	0	0	5'utr
GAPDH	4	51	11	3.77273	0.98	4.16295	1	38	8	0	0	2	1	0	0	0	5'utr-intron
GAPDHP61	1	9	9	0.444444	0.44	0.60206	0.6	6	6	0	0	0	0	0	0	0	processed_pseudogene
GAPDHP65	1	17	17	0.705882	0.71	0.60206	0.6	14	14	0	0	0	0	0	0	0	processed_pseudogene
GAR1	8	178	19	5.83191	0.74	7.42912	0.86	135	15.5	2	0	5	0	0	0	0	5'utr-intron
GAREM	1	15	15	0.866667	0.87	0.812913	0.81	8	8	0	1	0	0	0	0	0	intron
GARS	1	8	8	1	1	0.90309	0.9	6	6	0	0	0	0	1	0	0	start_codon
GAS7	1	11	11	0.727273	0.73	0.90309	0.9	8	8	1	0	0	0	0	0	0	5'utr
GATA3	3	53	19	2.41029	0.82	2.81158	0.95	42	13	2	0	0	0	0	0	0	processed_transcript
GATAD1	1	16	16	0.875	0.88	1.14613	1.15	12	12	1	0	0	0	0	0	0	5'utr
GATAD2A	9	107	11	8.13954	0.9	8.20322	0.95	90	10	3	1	1	4	0	0	0	5'utr
GATS	1	14	14	0.928571	0.93	0.812913	0.81	10	10	0	0	0	0	0	0	0	nonsense_mediated_decay
GATSL2	1	7	7	0.714286	0.71	0.69897	0.7	6	6	1	0	0	0	0	0	0	5'utr
GBP2	1	41	41	1	1	1.61278	1.61	15	15	1	0	0	0	0	0	0	5'utr
GCC1	2	27	13	1.66667	0.83	2.04922	1.02	18	9	2	0	0	0	0	0	0	5'utr
GCH1	1	12	12	0.916667	0.92	1.04139	1.04	12	12	1	0	0	0	0	0	0	5'utr
GCLC	2	24	12	1.8	0.9	1.73239	0.87	19	9.5	2	0	0	0	0	0	0	5'utr
GCLM	3	107	21	2.67857	0.9	3.87645	1.28	68	17	2	0	0	0	1	0	0	start_codon
GDAP2	1	12	12	1	1	1.07918	1.08	8	8	1	0	0	0	0	0	0	5'utr
GDE1	1	21	21	0.904762	0.9	1.27875	1.28	17	17	1	0	0	0	0	0	0	5'utr
GDI2	3	33	8	2.51587	0.94	2.7356	0.9	32	8	2	0	0	1	0	0	0	3'utr
GET4	1	9	9	1	1	0.954243	0.95	9	9	0	0	0	1	0	0	0	3'utr
GFER	1	8	8	0.75	0.75	0.778151	0.78	7	7	0	0	1	0	0	0	0	coding
GFM2	1	22	22	1	1	1.34242	1.34	6	6	1	0	0	0	0	0	0	5'utr
GFOD1	7	117	15	6.44193	0.92	7.19659	1.11	78	10	5	0	1	1	0	0	0	3'utr
GGCX	1	13	13	0.923077	0.92	1.07918	1.08	10	10	1	0	0	0	0	0	0	5'utr
GGNBP2	2	18	9	1.90909	0.95	1.8451	0.92	14	7	2	0	0	0	0	0	0	5'utr
GID4	1	11	11	1	1	1.04139	1.04	10	10	0	0	1	0	0	0	0	coding
GID8	3	36	7	2.86364	1	2.96895	0.85	22	7	1	0	0	2	0	0	0	5'utr
GIGYF2	1	12	12	1	1	1.07918	1.08	10	10	1	0	0	0	0	0	0	5'utr
GIMAP6	1	9	9	0.888889	0.89	0.90309	0.9	8	8	1	0	0	0	0	0	0	5'utr
GINS3	1	17	17	1	1	1.23045	1.23	9	9	1	0	0	0	0	0	0	5'utr
GINS4	1	11	11	1	1	1.04139	1.04	10	10	0	0	0	0	0	0	0	5'utr-intron
GIT1	1	26	26	0.769231	0.77	0.823909	0.82	22	22	1	0	0	0	0	0	0	5'utr
GLB1L3	1	10	10	1	1	1	1	9	9	1	0	0	0	0	0	0	5'utr
GLRX5	1	21	21	0.714286	0.71	0.875061	0.88	18	18	0	0	0	0	1	0	0	start_codon
GLS	5	85	18	4.07317	0.92	5.41095	1.2	55	12	2	0	2	0	1	0	0	5'utr
GLT8D1	2	22	11	1.45455	0.73	1.77815	0.89	17	8.5	1	0	0	0	0	0	0	5'utr-intron
GLUD1P3	1	20	20	0.95	0.95	1.27875	1.28	13	13	0	0	0	0	0	0	0	processed_transcript
GLUL	1	9	9	1	1	0.954243	0.95	5	5	1	0	0	0	0	0	0	5'utr
GLYR1	1	9	9	0.888889	0.89	0.90309	0.9	8	8	0	0	0	0	1	0	0	start_codon
GMCL1	1	30	30	0.9	0.9	0.829304	0.83	22	22	1	0	0	0	0	0	0	5'utr
GMNN	2	64	32	1.96078	0.98	2.80414	1.4	35	17.5	2	0	0	0	0	0	0	5'utr
GMPPA	1	8	8	0.875	0.88	0.845098	0.85	8	8	1	0	0	0	0	0	0	5'utr
GMPPB	3	43	12	2.56548	0.86	2.62118	0.8	41	12	0	0	0	2	0	0	0	3'utr
GNA12	3	33	10	2.36429	0.75	2.43136	0.78	30	7	1	0	2	0	0	0	0	coding
GNA13	1	35	35	0.6	0.6	0.720159	0.72	33	33	1	0	0	0	0	0	0	5'utr
GNA15	4	90	24	3.56821	0.89	4.8293	1.18	69	16	2	0	0	2	0	0	0	5'utr
GNAI2	1	77	77	0.818182	0.82	1.19728	1.2	60	60	1	0	0	0	0	0	0	5'utr
GNAQ	3	43	15	2.32381	0.8	2.22531	0.78	36	12	2	0	0	0	1	0	0	start_codon
GNAS	6	281	17	4.41961	0.72	5.96437	1	205	15	2	4	0	0	0	0	0	intron
GNB1	3	48	10	2.65714	0.9	2.68664	0.95	33	7	1	0	1	1	0	0	0	3'utr
GNB2L1	1	52	52	0.903846	0.9	1.6721	1.67	41	41	0	0	0	0	1	0	0	start_codon
GNG2	2	27	13	1.83333	0.92	1.8293	0.91	22	11	2	0	0	0	0	0	0	5'utr
GNG4	1	8	8	0.875	0.88	0.845098	0.85	6	6	1	0	0	0	0	0	0	5'utr
GNG5	2	43	21	1.71957	0.86	2.23045	1.12	36	18	1	0	0	0	1	0	0	start_codon
GNL1	6	127	15	5.27421	0.87	6.15912	1.01	89	11	4	0	0	1	1	0	0	3'utr
GNL2	1	19	19	0.947368	0.95	1.25527	1.26	14	14	0	0	0	0	0	0	0	processed_transcript
GNPDA2	1	8	8	0.875	0.88	0.845098	0.85	8	8	1	0	0	0	0	0	0	5'utr
GOLGA3	2	16	8	1.88889	0.94	1.74819	0.87	13	6.5	1	0	0	0	0	1	0	stop_codon
GOLPH3	1	23	23	0.826087	0.83	1.27875	1.28	16	16	1	0	0	0	0	0	0	5'utr
GOLPH3L	2	18	9	1.775	0.89	1.79934	0.9	16	8	0	0	0	0	0	0	0	processed_transcript
GOPC	2	37	18	1.84615	0.92	2.08279	1.04	28	14	2	0	0	0	0	0	0	5'utr
GOSR1	1	7	7	1	1	0.845098	0.85	5	5	0	0	0	0	1	0	0	start_codon
GP1BB	4	56	14	3.66667	0.9	3.57749	0.9	43	9	0	1	2	1	0	0	0	intron
GPBP1	2	17	8	1.8	0.9	1.74819	0.87	17	8.5	1	0	1	0	0	0	0	5'utr
GPBP1L1	1	8	8	0.5	0.5	0.60206	0.6	8	8	1	0	0	0	0	0	0	5'utr
GPHN	1	13	13	0.846154	0.85	1.04139	1.04	8	8	1	0	0	0	0	0	0	5'utr
GPN2	3	39	8	2.95833	1	3.10992	0.9	27	7	2	0	1	0	0	0	0	coding
GPR108	1	7	7	1	1	0.778151	0.78	5	5	0	0	0	0	0	0	0	coding-intron
GPR125	1	11	11	1	1	1.04139	1.04	9	9	1	0	0	0	0	0	0	5'utr
GPR137	4	50	12	3.47253	0.93	4.00139	0.97	42	10	2	2	0	0	0	0	0	5'utr
GPR17	1	7	7	0.857143	0.86	0.778151	0.78	6	6	0	0	0	1	0	0	0	3'utr
GPSM3	2	15	7	1.5	0.75	1.44716	0.72	15	7.5	1	0	0	1	0	0	0	3'utr
GRAMD1A	1	9	9	0.555556	0.56	0.69897	0.7	9	9	1	0	0	0	0	0	0	5'utr
GRAMD1C	2	34	17	1.32806	0.66	2.03342	1.02	25	12.5	0	2	0	0	0	0	0	intron
GRAMD4	10	123	11	8.95021	0.89	9.07511	0.93	98	8.5	0	0	0	10	0	0	0	3'utr
GRAP	1	8	8	0.875	0.88	0.845098	0.85	8	8	0	0	0	1	0	0	0	3'utr
GRAP2	1	13	13	1	1	1.11394	1.11	11	11	1	0	0	0	0	0	0	5'utr
GRB2	5	150	14	3.975	0.8	5.06065	1.11	111	11	4	0	0	1	0	0	0	3'utr
GRPEL2	2	22	11	1.67857	0.84	1.89209	0.95	18	9	0	1	1	0	0	0	0	coding
GRSF1	2	23	11	1.8	0.9	1.716	0.86	19	9.5	0	0	1	0	0	0	0	coding-intron
GSK3A	3	53	20	2.35952	0.8	2.48572	0.9	45	14	0	0	1	0	1	0	0	coding
GSK3B	3	67	20	2.60376	0.85	3.53687	1.23	43	16	3	0	0	0	0	0	0	5'utr
GSKIP	1	8	8	0.75	0.75	0.778151	0.78	8	8	0	0	0	0	0	0	0	5'utr-intron
GSPT1	2	108	54	1.55556	0.78	2.12057	1.06	79	39.5	1	1	0	0	0	0	0	5'utr
GSTO1	1	9	9	0.666667	0.67	0.778151	0.78	8	8	1	0	0	0	0	0	0	5'utr
GSTP1	2	24	12	1.58741	0.79	1.95424	0.98	19	9.5	1	0	0	1	0	0	0	5'utr
GSTZ1	1	18	18	1	1	1.25527	1.26	9	9	1	0	0	0	0	0	0	5'utr
GTF2A2	1	49	49	0.959184	0.96	1.37107	1.37	49	49	1	0	0	0	0	0	0	5'utr
GTF2E2	1	10	10	0.9	0.9	0.653213	0.65	8	8	1	0	0	0	0	0	0	5'utr
GTF2F1	2	14	7	2	1	1.6902	0.85	12	6	2	0	0	0	0	0	0	5'utr
GTF2H4	1	15	15	0.8	0.8	1.07918	1.08	13	13	0	0	0	1	0	0	0	3'utr
GTF2I	1	8	8	0.75	0.75	0.778151	0.78	8	8	1	0	0	0	0	0	0	5'utr
GTF2IP1	2	28	14	1.85714	0.93	2.10037	1.05	22	11	0	0	0	0	0	0	0	processed_transcript
GTF3A	1	12	12	0.916667	0.92	1.04139	1.04	11	11	0	0	0	0	0	0	0	coding-intron
GTF3C4	1	16	16	0.875	0.88	0.845098	0.85	11	11	1	0	0	0	0	0	0	5'utr
GTF3C5	1	9	9	1	1	0.954243	0.95	5	5	0	0	1	0	0	0	0	coding
GTPBP3	1	21	21	0.952381	0.95	1	1	16	16	0	0	1	0	0	0	0	coding
GTSE1	2	20	10	1.41758	0.71	1.64345	0.82	18	9	0	0	1	1	0	0	0	coding
GUF1	2	22	11	1.69231	0.85	1.90849	0.95	19	9.5	1	0	1	0	0	0	0	5'utr
GXYLT2	1	8	8	0.875	0.88	0.845098	0.85	8	8	0	1	0	0	0	0	0	intron
GYPC	2	14	7	1.85714	0.93	1.62325	0.81	13	6.5	1	0	0	0	1	0	0	5'utr
H1F0	2	29	14	1.78571	0.89	2.21748	1.11	19	9.5	1	0	0	1	0	0	0	5'utr
H1FX	11	1438	64	9.0328	0.83	12.9489	1.01	622	41	4	0	2	4	1	0	0	3'utr
H2AFV	1	68	68	0.808824	0.81	1.43933	1.44	48	48	1	0	0	0	0	0	0	5'utr
H2AFX	13	382	17	10.769	0.83	12.8327	1	310	15	0	0	4	8	1	0	0	3'utr
H2AFZ	2	84	42	1.85526	0.93	2.41497	1.21	68	34	1	0	1	0	0	0	0	coding
H2BFS	2	43	21	1.60227	0.8	2.35025	1.18	24	12	0	0	1	0	1	0	0	start_codon
H3F3A	1	28	28	0.75	0.75	1.02119	1.02	19	19	0	0	0	0	0	0	0	intron-5'utr
H3F3B	5	291	10	4.71966	0.94	5.83575	0.95	135	10	1	0	3	1	0	0	0	3'utr
H3F3C	1	161	161	0.944099	0.94	1.40369	1.4	25	25	1	0	0	0	0	0	0	5'utr
HAR1A	1	27	27	0.888889	0.89	1.38021	1.38	15	15	0	0	0	0	0	0	0	lincRNA_exon
HAUS3	1	26	26	0.884615	0.88	1.0607	1.06	17	17	0	1	0	0	0	0	0	intron
HAUS4	2	27	13	1.63187	0.82	2.08279	1.04	26	13	2	0	0	0	0	0	0	5'utr
HAX1	1	17	17	1	1	1.23045	1.23	10	10	1	0	0	0	0	0	0	5'utr
HCFC1	19	281	10	16.7212	0.9	18.1182	0.9	239	10	9	0	4	6	0	0	0	3'utr
HCFC1R1	1	11	11	0.909091	0.91	1	1	8	8	1	0	0	0	0	0	0	5'utr
HCG11	1	7	7	0.714286	0.71	0.69897	0.7	5	5	0	0	0	0	0	0	0	lincRNA_exon
HCG18	1	8	8	0.75	0.75	0.778151	0.78	8	8	0	0	0	0	0	0	0	antisense
HCST	2	20	10	1.7033	0.85	1.51851	0.76	18	9	1	0	1	0	0	0	0	5'utr
HDAC2	3	85	15	2.63636	0.87	3.32077	1.11	50	15	3	0	0	0	0	0	0	5'utr
HDAC7	3	28	10	2.45714	0.8	2.2833	0.78	26	9	0	0	1	2	0	0	0	3'utr
HDGF	13	353	13	11.3451	0.87	11.9335	0.85	248	12	4	0	1	6	0	0	0	3'utr
HDGFRP3	3	31	10	2.55714	0.86	2.76938	0.85	29	10	3	0	0	0	0	0	0	5'utr
HDHD3	2	14	7	2	1	1.6902	0.85	8	4	1	0	1	0	0	0	0	coding
HEATR2	1	9	9	0.833333	0.83	0.69897	0.7	6	6	0	1	0	0	0	0	0	intron
HEBP2	2	85	42	1.8347	0.92	2.78958	1.39	62	31	2	0	0	0	0	0	0	5'utr
HECA	2	25	12	1.83974	0.92	2.12057	1.06	23	11.5	2	0	0	0	0	0	0	5'utr
HELZ2	1	7	7	0.857143	0.86	0.778151	0.78	6	6	0	0	1	0	0	0	0	coding
HERC4	1	13	13	0.923077	0.92	1.07918	1.08	9	9	1	0	0	0	0	0	0	5'utr
HERPUD2	1	9	9	1	1	0.954243	0.95	8	8	1	0	0	0	0	0	0	5'utr
HES4	4	74	17	3.4909	0.86	4.14027	1.02	49	13.5	1	0	1	0	0	1	0	stop_codon
HEXDC	1	7	7	1	1	0.845098	0.85	6	6	1	0	0	0	0	0	0	5'utr
HEXIM1	6	105	11	5.2359	0.9	5.20074	0.9	90	9	5	0	1	0	0	0	0	5'utr
HGNC:9982	2	17	8	1.88889	0.94	1.50515	0.75	15	7.5	0	0	0	2	0	0	0	3'utr
HHIP-AS1	1	8	8	0.75	0.75	0.778151	0.78	7	7	0	0	0	0	0	0	0	antisense
HIATL1	1	154	154	0.922078	0.92	1.30719	1.31	56	56	1	0	0	0	0	0	0	5'utr
HIATL2	1	92	92	0.98913	0.99	1.95904	1.96	23	23	1	0	0	0	0	0	0	5'utr
HIF1A	2	32	16	1.95	0.98	2.35793	1.18	25	12.5	2	0	0	0	0	0	0	5'utr
HIGD2A	1	10	10	0.8	0.8	0.90309	0.9	10	10	0	0	0	0	1	0	0	start_codon
HILPDA	2	21	10	1.54808	0.77	1.77815	0.89	19	9.5	1	0	0	0	0	0	0	5'utr
HINT1	3	43	16	2.77083	0.94	3.30963	1.18	27	9	2	0	1	0	0	0	0	coding
HIPK1	1	21	21	0.666667	0.67	0.669007	0.67	20	20	0	1	0	0	0	0	0	intron
HIPK2	2	18	9	1.77778	0.89	1.79934	0.9	16	8	0	0	0	2	0	0	0	3'utr
HIST1H1B	5	160	21	4.40882	0.9	5.75455	0.99	104	17	0	0	4	0	1	0	0	coding
HIST1H1C	5	141	28	4.29848	0.86	6.0243	1.23	104	19	0	0	4	0	1	0	0	coding
HIST1H1D	2	72	36	1.57343	0.79	2.5977	1.3	53	26.5	0	0	1	0	1	0	0	coding
HIST1H1E	3	170	25	2.78271	0.93	3.90998	1.38	114	16	0	0	2	0	1	0	0	start_codon
HIST1H2AB	1	7	7	1	1	0.845098	0.85	5	5	0	0	1	0	0	0	0	coding
HIST1H2AC	3	891	41	2.57995	0.86	4.13702	1.51	269	33	0	0	2	0	0	0	0	coding
HIST1H2AD	2	64	32	1.89189	0.95	2.64885	1.32	42	21	0	0	2	0	0	0	0	coding
HIST1H2AE	3	62	20	2.74013	0.91	3.68664	1.26	54	17	0	0	2	0	1	0	0	start_codon
HIST1H2AG	3	340	24	2.49902	0.85	3.32055	1.02	135	22	0	0	1	0	1	1	0	start_codon
HIST1H2AH	2	53	26	1.8873	0.94	2.74896	1.37	43	21.5	0	0	1	0	1	0	0	start_codon
HIST1H2AI	4	178	41	3.17446	0.79	4.29619	1	113	27	0	0	3	0	1	0	0	start_codon
HIST1H2AJ	2	68	34	1.91176	0.96	2.54654	1.27	37	18.5	0	0	2	0	0	0	0	coding
HIST1H2AK	1	20	20	0.9	0.9	0.954243	0.95	8	8	0	0	1	0	0	0	0	coding
HIST1H2AL	3	135	31	2.43327	0.78	2.61082	0.93	47	13	0	0	3	0	0	0	0	coding
HIST1H2AM	3	117	20	2.53103	0.9	3.00886	0.95	69	16	0	0	2	0	1	0	0	coding
HIST1H2BC	2	32	16	1.35065	0.68	1.72016	0.86	29	14.5	0	0	2	0	0	0	0	coding
HIST1H2BD	4	76	20	2.83571	0.73	3.98227	0.99	59	15	0	0	3	0	1	0	0	start_codon
HIST1H2BF	3	41	13	2.38057	0.84	3.00346	0.95	34	10	0	0	2	0	1	0	0	start_codon
HIST1H2BG	1	11	11	0.818182	0.82	0.954243	0.95	11	11	0	0	0	0	1	0	0	start_codon
HIST1H2BH	1	12	12	0.833333	0.83	1	1	7	7	0	0	1	0	0	0	0	coding
HIST1H2BI	2	65	32	1.90909	0.95	2.39794	1.2	51	25.5	0	0	1	0	1	0	0	start_codon
HIST1H2BJ	3	96	19	2.56135	0.88	4.07452	1.2	75	18	0	0	1	0	1	1	0	stop_codon
HIST1H2BK	2	67	33	1.89091	0.95	2.29226	1.15	41	20.5	0	0	1	0	1	0	0	coding
HIST1H2BL	1	11	11	0.909091	0.91	1	1	11	11	0	0	1	0	0	0	0	coding
HIST1H2BN	3	39	15	2.62083	0.88	3.10517	1.11	29	9	1	0	1	0	1	0	0	5'utr
HIST1H2BO	2	33	16	1.52381	0.76	2.15836	1.08	26	13	0	0	1	0	1	0	0	start_codon
HIST1H2BPS3	1	7	7	0.714286	0.71	0.69897	0.7	5	5	0	0	0	0	0	0	0	processed_pseudogene
HIST1H3B	5	712	54	4.21308	0.94	6.86053	1.23	141	30	0	0	5	0	0	0	0	coding
HIST1H3C	1	7	7	1	1	0.845098	0.85	7	7	0	0	1	0	0	0	0	coding
HIST1H3D	4	92	16	3.5377	0.88	4.34588	1.06	70	15	0	0	3	0	1	0	0	coding
HIST1H3F	3	649	94	2.69234	0.87	4.52093	1.31	148	49	0	0	1	0	1	1	0	stop_codon
HIST1H3G	4	255	33	2.93414	0.77	3.40756	0.86	102	17	0	0	2	0	1	1	0	stop_codon
HIST1H3H	4	165	23	3.2439	0.8	3.93651	0.93	112	18	0	0	3	0	1	0	0	start_codon
HIST1H3I	3	96	14	2.20952	0.69	2.58433	0.9	56	12	0	0	2	0	1	0	0	coding
HIST1H3J	3	54	9	2.80781	0.92	3.33766	0.9	48	8	0	0	2	0	0	1	0	stop_codon
HIST1H4A	1	165	165	0.909091	0.91	1.273	1.27	106	106	0	0	0	0	1	0	0	start_codon
HIST1H4B	3	57	12	2.47504	0.82	3.10037	1	49	11	0	0	2	0	1	0	0	coding
HIST1H4C	3	40	12	2.58333	0.92	2.43933	0.74	37	10	0	0	2	0	0	1	0	coding
HIST1H4D	1	42	42	0.761905	0.76	0.660052	0.66	40	40	0	0	0	0	1	0	0	start_codon
HIST1H4E	2	214	107	1.74965	0.87	2.76556	1.38	178	89	0	0	1	0	0	1	0	coding
HIST1H4F	4	126	20	3.27343	0.82	4.07118	0.99	98	20	0	0	2	0	1	1	0	start_codon
HIST1H4H	2	153	76	1.68618	0.84	2.63949	1.32	117	58.5	0	0	1	0	1	0	0	coding
HIST1H4I	3	115	37	2.42211	0.82	3.22259	1.15	60	18	0	0	2	0	1	0	0	start_codon
HIST1H4J	3	157	37	2.38344	0.78	3.20981	1.11	107	31	0	0	1	0	1	1	0	start_codon
HIST1H4K	3	165	48	2.56812	0.83	2.55429	0.7	89	29	0	0	2	0	1	0	0	coding
HIST1H4L	1	54	54	0.777778	0.78	0.720159	0.72	26	26	0	0	0	0	1	0	0	start_codon
HIST2H2AA4	8	279	18	6.5818	0.84	7.82544	0.99	159	11.5	1	0	4	0	1	2	0	stop_codon
HIST2H2AB	4	64	15	3.78975	0.93	4.28185	1.09	54	14	0	0	3	0	1	0	0	coding
HIST2H2AC	5	144	18	3.9383	0.82	5.87233	1.15	102	15	0	0	4	0	1	0	0	start_codon
HIST2H2BE	3	78	11	2.73344	0.92	3.11261	0.95	57	11	0	1	0	1	1	0	0	intron
HIST2H3A	4	370	73	3.4033	0.84	5.64836	1.5	112	30.5	0	0	3	0	1	0	0	start_codon
HIST2H3C	6	391	60	5.54418	0.91	8.88628	1.5	135	21	0	0	4	0	1	1	0	stop_codon
HIST2H3D	2	55	27	1.87234	0.94	1.91381	0.96	29	14.5	0	0	2	0	0	0	0	coding
HIST2H4A	2	111	55	1.7661	0.88	2.47658	1.24	80	40	0	0	1	0	1	0	0	start_codon
HIST2H4B	2	97	48	1.69413	0.85	1.79819	0.9	60	30	0	0	1	0	1	0	0	coding
HIST3H2A	2	28	14	1.73262	0.87	1.66901	0.83	23	11.5	0	0	2	0	0	0	0	coding
HIST3H2BA	1	7	7	1	1	0.845098	0.85	2	2	0	0	0	0	0	0	0	unitary_pseudogene
HIST3H2BB	1	7	7	0.857143	0.86	0.778151	0.78	7	7	0	0	0	0	1	0	0	start_codon
HIST3H3	1	12	12	1	1	1.07918	1.08	7	7	0	0	1	0	0	0	0	coding
HIVEP2	4	44	11	2.98333	0.74	3.25888	0.76	42	10.5	1	0	0	3	0	0	0	3'utr
HIVEP3	7	105	15	6.37942	0.89	6.15231	0.85	84	11	0	0	4	3	0	0	0	3'utr
HJURP	1	7	7	0.857143	0.86	0.778151	0.78	7	7	0	0	1	0	0	0	0	coding
HLA-A	2	22	11	1.63333	0.82	1.90309	0.95	20	10	0	0	2	0	0	0	0	coding
HLA-B	1	8	8	0.875	0.88	0.845098	0.85	8	8	0	0	0	0	1	0	0	start_codon
HLA-E	5	44	9	4.46032	0.89	4.4216	0.9	40	7	0	0	5	0	0	0	0	coding
HLTF	1	9	9	1	1	0.954243	0.95	7	7	1	0	0	0	0	0	0	5'utr
HM13	1	13	13	0.846154	0.85	1.04139	1.04	11	11	1	0	0	0	0	0	0	5'utr
HMCES	1	8	8	0.875	0.88	0.845098	0.85	8	8	1	0	0	0	0	0	0	5'utr
HMG20B	1	8	8	0.75	0.75	0.778151	0.78	7	7	0	0	0	0	0	0	0	retained_intron
HMGA1	8	203	15	7.09718	0.91	9.07857	0.97	103	9.5	2	0	0	5	1	0	0	5'utr
HMGB1	3	68	20	2.64615	0.85	3.31246	1.04	33	9	2	0	1	0	0	0	0	coding
HMGB2	6	280	12	4.84497	0.85	6.01529	0.98	167	11	1	0	0	3	1	1	0	3'utr
HMGCS1	1	14	14	0.928571	0.93	1.11394	1.11	13	13	0	0	0	0	0	1	0	stop_codon
HMGN1	1	10	10	0.9	0.9	0.653213	0.65	9	9	1	0	0	0	0	0	0	5'utr
HMGN2	2	266	133	1.7085	0.85	2.35603	1.18	98	49	0	0	0	0	1	0	0	processed_transcript
HMGN4	1	18	18	0.722222	0.72	0.812913	0.81	12	12	1	0	0	0	0	0	0	5'utr
HMGXB3	1	16	16	0.875	0.88	1.14613	1.15	11	11	0	0	1	0	0	0	0	coding
HMGXB4	1	7	7	0.857143	0.86	0.778151	0.78	7	7	1	0	0	0	0	0	0	5'utr
HMHA1	4	40	9	3.85714	1	3.54753	0.85	38	9	0	0	0	3	0	1	0	stop_codon
HN1	1	30	30	0.866667	0.87	1.41497	1.41	21	21	1	0	0	0	0	0	0	5'utr
HNRNPA0	13	950	27	9.95747	0.78	15.1198	1.15	483	18	2	0	8	2	1	0	0	3'utr
HNRNPA2B1	10	379	22	8.46346	0.86	10.3664	0.9	271	19	0	0	3	2	1	1	0	3'utr
HNRNPA3	3	34	12	2.69444	0.92	3.00043	1.04	31	11	0	0	2	0	1	0	0	start_codon
HNRNPA3P1	1	7	7	0.857143	0.86	0.778151	0.78	6	6	0	0	0	0	0	0	0	processed_pseudogene
HNRNPA3P6	1	12	12	0.916667	0.92	1.04139	1.04	9	9	0	0	0	0	0	0	0	processed_pseudogene
HNRNPAB	4	766	24	3.41447	0.83	4.32129	1.04	269	22	2	0	0	1	1	0	0	5'utr
HNRNPC	1	60	60	0.95	0.95	1.27875	1.28	34	34	1	0	0	0	0	0	0	5'utr
HNRNPD	4	223	45	3.33325	0.84	5.035	1.23	148	33	2	0	0	0	1	0	0	start_codon
HNRNPDL	3	35	8	2.75714	0.9	2.93651	0.9	30	7	2	0	1	0	0	0	0	coding
HNRNPF	10	317	12	8.77496	0.9	9.53941	0.9	208	11	5	0	2	0	0	0	0	coding
HNRNPH1	7	117	14	6.07833	0.89	6.98394	0.95	103	12	1	0	3	1	1	0	0	3'utr
HNRNPH3	3	28	9	3	1	2.89873	0.95	28	9	1	0	1	0	0	1	0	5'utr
HNRNPK	5	90	15	4.54655	0.92	5.35837	1.04	67	14	3	0	1	0	0	0	0	coding
HNRNPKP2	1	8	8	1	1	0.90309	0.9	4	4	0	0	0	0	0	0	0	processed_pseudogene
HNRNPL	1	44	44	0.568182	0.57	1.39794	1.4	39	39	0	0	1	0	0	0	0	coding
HNRNPLL	1	36	36	1	1	1.5563	1.56	11	11	1	0	0	0	0	0	0	5'utr
HNRNPR	1	119	119	0.890756	0.89	1.54818	1.55	22	22	1	0	0	0	0	0	0	5'utr
HNRNPU	4	139	31	3.45379	0.86	4.76552	1.19	72	13.5	3	0	1	0	0	0	0	coding
HNRNPUL1	4	46	11	3.37094	0.88	3.27231	0.78	36	9.5	0	0	1	1	1	0	0	start_codon
HNRNPUL2	2	32	16	1.80193	0.9	2.22531	1.11	26	13	1	0	1	0	0	0	0	coding
HOMER1	7	180	10	5.5739	0.82	5.427	0.65	145	10	7	0	0	0	0	0	0	5'utr
HOOK3	1	12	12	0.916667	0.92	0.740363	0.74	12	12	1	0	0	0	0	0	0	5'utr
HPCAL1	4	111	30	3.44375	0.86	5.12901	1.28	69	18.5	4	0	0	0	0	0	0	5'utr
HRAS	1	16	16	1	1	1.20412	1.2	11	11	0	0	0	0	0	0	0	processed_transcript
HS2ST1	3	127	47	2.23008	0.81	3.40261	1.1	94	26	3	0	0	0	0	0	0	5'utr
HS6ST1	2	15	7	1.85714	0.93	1.68124	0.84	10	5	0	0	1	1	0	0	0	3'utr
HSDL1	1	7	7	0.857143	0.86	0.778151	0.78	6	6	0	0	0	1	0	0	0	3'utr
HSP90AA1	3	61	16	2.84559	0.97	3.70603	1.15	42	12	1	0	2	0	0	0	0	coding
HSP90AB1	3	105	8	2.67659	0.88	3.07555	0.85	62	8	1	0	1	0	0	0	0	5'utr
HSP90B1	2	52	26	1.68452	0.84	1.89854	0.95	41	20.5	0	0	0	0	1	1	0	start_codon
HSPA14	1	8	8	1	1	0.90309	0.9	2	2	0	1	0	0	0	0	0	intron
HSPA1B	1	10	10	1	1	1	1	7	7	1	0	0	0	0	0	0	5'utr
HSPA4	2	53	26	1.82601	0.91	2.18089	1.09	35	17.5	2	0	0	0	0	0	0	5'utr
HSPA5	8	340	10	7.26304	0.91	7.75842	0.9	208	10.5	0	0	6	1	1	0	0	3'utr
HSPA8	1	32	32	0.78125	0.78	0.79588	0.8	19	19	1	0	0	0	0	0	0	5'utr
HSPA8P8	1	9	9	0.777778	0.78	0.845098	0.85	6	6	0	0	0	0	0	0	0	processed_pseudogene
HSPA9	1	7	7	1	1	0.845098	0.85	7	7	1	0	0	0	0	0	0	5'utr
HSPB1	2	59	29	1.97436	0.99	2.88081	1.44	47	23.5	0	2	0	0	0	0	0	intron
HSPB1P2	1	8	8	1	1	0.90309	0.9	7	7	0	0	0	0	0	0	0	processed_pseudogene
HSPBP1	2	18	9	1.77778	0.89	1.79934	0.9	16	8	1	0	1	0	0	0	0	coding
HSPE1	2	44	22	1.9089	0.95	2.04139	1.02	29	14.5	2	0	0	0	0	0	0	5'utr
HSPH1	2	147	73	1.93266	0.97	3.39724	1.7	78	39	2	0	0	0	0	0	0	5'utr
HTRA2	1	15	15	1	1	1.17609	1.18	7	7	1	0	0	0	0	0	0	5'utr
ICK	1	18	18	0.888889	0.89	1.20412	1.2	12	12	1	0	0	0	0	0	0	5'utr
ICMT	2	32	16	1.92	0.96	1.7297	0.86	25	12.5	0	0	0	1	1	0	0	3'utr
ID1	1	17	17	0.882353	0.88	1.17609	1.18	16	16	0	0	0	1	0	0	0	3'utr
ID3	7	115	13	6.23856	0.89	7.02563	1	100	11	2	0	1	4	0	0	0	3'utr
IDI1	2	30	15	1.95	0.98	2.27875	1.14	18	9	1	0	1	0	0	0	0	coding
IER2	24	641	14	20.8802	0.89	23.6817	0.95	507	11	3	4	7	7	1	0	0	5'utr-intron
IER3	8	396	28	7.31888	0.92	9.04783	1.14	310	22	0	0	3	4	1	0	0	3'utr
IER5	3	29	8	2.59615	0.88	2.73159	0.85	26	8	0	0	2	1	0	0	0	coding
IER5L	1	7	7	1	1	0.845098	0.85	4	4	1	0	0	0	0	0	0	5'utr
IFFO2	1	12	12	1	1	1.07918	1.08	8	8	1	0	0	0	0	0	0	5'utr
IFI16	2	20	10	2	1	2	1	19	9.5	2	0	0	0	0	0	0	5'utr
IFI6	1	26	26	0.730769	0.73	0.977724	0.98	16	16	1	0	0	0	0	0	0	5'utr
IFIT5	1	8	8	0.75	0.75	0.778151	0.78	7	7	1	0	0	0	0	0	0	5'utr
IFITM1	1	11	11	0.909091	0.91	0.69897	0.7	8	8	1	0	0	0	0	0	0	5'utr
IFNAR1	1	7	7	1	1	0.845098	0.85	7	7	1	0	0	0	0	0	0	5'utr
IFNAR2	4	73	17	3.54921	0.89	4.17565	1.03	48	10.5	3	0	0	1	0	0	0	5'utr
IFRD2	1	7	7	0.857143	0.86	0.778151	0.78	7	7	0	0	0	1	0	0	0	3'utr
IFT27	2	63	31	1.92857	0.96	2.95904	1.48	32	16	2	0	0	0	0	0	0	5'utr
IFT81	1	7	7	1	1	0.845098	0.85	3	3	1	0	0	0	0	0	0	5'utr
IGF2BP1	1	40	40	0.975	0.98	1.29003	1.29	33	33	1	0	0	0	0	0	0	5'utr
IGFLR1	1	7	7	1	1	0.845098	0.85	6	6	0	0	1	0	0	0	0	coding
IGSF8	1	7	7	1	1	0.845098	0.85	5	5	0	0	0	0	1	0	0	start_codon
IKBKAP	1	7	7	0.833333	0.83	0.69897	0.7	6	6	1	0	0	0	0	0	0	5'utr
IKZF1	12	199	10	10.3473	0.87	11.23	0.9	140	9	0	0	1	11	0	0	0	coding
IL16	2	21	10	1.64286	0.82	1.51188	0.76	18	9	0	0	1	1	0	0	0	coding
IL17RA	1	7	7	0.714286	0.71	0.69897	0.7	7	7	0	0	1	0	0	0	0	coding
IL21R	4	45	9	3.68889	0.94	3.68984	0.93	38	8.5	4	0	0	0	0	0	0	5'utr
IL6ST	1	7	7	0.571429	0.57	0.60206	0.6	6	6	1	0	0	0	0	0	0	5'utr
ILF2	2	35	17	1.60784	0.8	1.98227	0.99	29	14.5	1	0	1	0	0	0	0	coding
ILF3	5	176	11	4.5154	0.91	4.50406	0.85	122	11	1	0	0	4	0	0	0	5'utr
IMMP1L	1	23	23	0.869565	0.87	1.30103	1.3	19	19	1	0	0	0	0	0	0	5'utr
IMMT	1	10	10	0.8	0.8	0.90309	0.9	9	9	0	0	0	0	1	0	0	start_codon
IMPAD1	2	63	31	1.76531	0.88	2.02776	1.01	41	20.5	1	0	1	0	0	0	0	coding
IMPDH2	1	14	14	0.928571	0.93	1.11394	1.11	9	9	0	0	0	0	0	0	0	retained_intron
ING1	6	269	15	5.58012	0.95	6.08493	0.95	157	9.5	4	0	1	0	1	0	0	5'utr
ING5	6	79	9	4.96537	0.83	5.04485	0.81	67	8	0	1	0	5	0	0	0	intron
INO80	1	9	9	0.888889	0.89	0.90309	0.9	8	8	1	0	0	0	0	0	0	5'utr
INO80E	1	18	18	0.833333	0.83	0.875061	0.88	16	16	0	0	0	0	1	0	0	start_codon
INPP4A	2	21	10	1.92308	0.96	1.98227	0.99	16	8	2	0	0	0	0	0	0	5'utr
INPP5E	3	25	8	2.9	1	2.70243	0.9	18	6	2	0	1	0	0	0	0	coding
INPPL1	1	10	10	0.7	0.7	0.845098	0.85	10	10	0	0	0	0	1	0	0	start_codon
INSIG1	5	83	15	4.08029	0.86	4.84994	1.04	68	11	1	0	1	1	1	0	0	5'utr
INTS5	1	9	9	1	1	0.954243	0.95	5	5	0	0	0	0	1	0	0	start_codon
INTS6	2	22	11	2	1	2.02119	1.01	18	9	2	0	0	0	0	0	0	5'utr
IP6K1	3	52	10	2.46618	0.9	2.85733	0.95	43	9	0	0	0	2	0	0	0	3'utr
IP6K2	2	39	19	1.96774	0.98	2.38021	1.19	32	16	1	0	0	1	0	0	0	3'utr
IPO13	2	32	16	1.81569	0.91	2.02119	1.01	24	12	2	0	0	0	0	0	0	5'utr
IPO7	1	7	7	1	1	0.845098	0.85	6	6	1	0	0	0	0	0	0	5'utr
IRAK1	1	7	7	0.857143	0.86	0.778151	0.78	6	6	0	0	1	0	0	0	0	coding
IRF1	10	476	14	8.60162	0.86	11.051	1	299	13.5	2	0	1	7	0	0	0	3'utr
IRF2BP1	5	78	13	4.62673	0.92	5.69979	1.08	67	11	3	0	1	0	1	0	0	coding
IRF2BP2	1	7	7	0.857143	0.86	0.778151	0.78	6	6	0	0	0	0	0	0	0	processed_transcript
IRF2BPL	6	105	12	5.93617	1	6.84004	1.1	74	10	5	0	0	1	0	0	0	3'utr
IRF3	2	17	8	1.76389	0.88	1.74819	0.87	14	7	1	0	1	0	0	0	0	coding
IRF7	1	8	8	0.875	0.88	0.845098	0.85	7	7	0	0	0	0	0	0	0	intron-5'utr
IRS1	1	9	9	1	1	0.954243	0.95	9	9	1	0	0	0	0	0	0	5'utr
IRS2	1	7	7	1	1	0.845098	0.85	5	5	1	0	0	0	0	0	0	5'utr
IRX3	1	11	11	1	1	1.04139	1.04	7	7	1	0	0	0	0	0	0	5'utr
ISCU	1	15	15	0.733333	0.73	1.04139	1.04	13	13	0	0	1	0	0	0	0	coding
ISG20L2	2	96	48	1.93103	0.97	2.86273	1.43	46	23	2	0	0	0	0	0	0	5'utr
IST1	1	9	9	0.888889	0.89	0.90309	0.9	6	6	1	0	0	0	0	0	0	5'utr
ISY1	1	11	11	0.909091	0.91	1	1	11	11	1	0	0	0	0	0	0	5'utr
ITFG3	1	21	21	0.952381	0.95	1	1	5	5	1	0	0	0	0	0	0	5'utr
ITGAV	1	7	7	1	1	0.845098	0.85	7	7	1	0	0	0	0	0	0	5'utr
ITGB1BP1	1	10	10	0.8	0.8	0.90309	0.9	8	8	1	0	0	0	0	0	0	5'utr
ITK	3	31	10	2.69808	0.9	2.87852	0.95	30	10	0	0	0	3	0	0	0	3'utr
ITM2A	2	50	25	1.88095	0.94	2.11227	1.06	34	17	2	0	0	0	0	0	0	5'utr
ITM2B	1	107	107	0.785047	0.79	1.22531	1.23	42	42	1	0	0	0	0	0	0	5'utr
ITPKB	1	7	7	0.571429	0.57	0.60206	0.6	6	6	0	0	1	0	0	0	0	coding
IVNS1ABP	2	44	22	1.96552	0.98	2.62325	1.31	31	15.5	2	0	0	0	0	0	0	5'utr
JADE2	2	16	8	1.77778	0.89	1.6902	0.85	14	7	0	0	1	1	0	0	0	coding
JAK2	1	7	7	1	1	0.845098	0.85	5	5	1	0	0	0	0	0	0	5'utr
JARID2	9	114	9	7.30187	0.86	7.7086	0.85	99	7	0	1	5	3	0	0	0	coding
JMJD8	3	35	11	2.77778	1	3.06258	1.04	30	9	0	2	0	0	0	0	0	intron
JMY	1	9	9	1	1	0.954243	0.95	8	8	1	0	0	0	0	0	0	5'utr
JOSD1	4	85	17	3.29286	0.82	4.427	1	67	15.5	2	0	0	0	0	0	0	5'utr
JTB	2	41	20	1.74242	0.87	1.92082	0.96	33	16.5	1	0	0	0	0	0	0	5'utr
JUN	2	18	9	1.81818	0.91	1.49831	0.75	15	7.5	2	0	0	0	0	0	0	5'utr
JUNB	2	24	12	1.76923	0.88	2.04139	1.02	21	10.5	2	0	0	0	0	0	0	5'utr
JUND	13	399	31	10.1757	0.77	12.6888	0.88	282	17	1	0	7	3	1	1	0	3'utr
KANSL1	11	439	12	9.15144	0.83	11.0569	1	252	10	0	5	4	2	0	0	0	3'utr
KANSL3	1	7	7	0.571429	0.57	0.60206	0.6	5	5	0	0	0	1	0	0	0	3'utr
KARS	1	9	9	0.777778	0.78	0.845098	0.85	5	5	0	0	0	0	1	0	0	start_codon
KAT6A	2	31	15	1.91667	0.96	2.32015	1.16	15	7.5	1	0	1	0	0	0	0	coding
KATNA1	2	14	7	2	1	1.6902	0.85	10	5	2	0	0	0	0	0	0	5'utr
KAZALD1	1	14	14	0.714286	0.71	0.69897	0.7	14	14	0	0	0	0	0	0	0	processed_transcript
KBTBD11	2	18	9	1.58442	0.79	1.38021	0.69	16	8	0	0	2	0	0	0	0	coding
KBTBD2	3	111	16	2.27826	0.79	2.94325	1.08	82	16	2	0	0	0	0	0	0	5'utr
KCNAB2	12	122	8	10.4667	0.87	10.4091	0.81	107	8	0	4	2	6	0	0	0	intron
KCNJ14	1	7	7	1	1	0.845098	0.85	7	7	0	0	0	1	0	0	0	3'utr
KCNK1	1	11	11	0.818182	0.82	0.653213	0.65	11	11	0	0	0	0	1	0	0	start_codon
KCNK5	3	65	20	2.68894	0.9	3.78958	1.3	53	19	3	0	0	0	0	0	0	5'utr
KCTD13	1	38	38	0.842105	0.84	1.02803	1.03	29	29	0	0	0	0	0	0	0	processed_transcript
KCTD14	1	8	8	1	1	0.90309	0.9	6	6	1	0	0	0	0	0	0	5'utr
KCTD20	3	25	8	2.76389	0.89	2.35025	0.85	21	7	0	0	0	3	0	0	0	3'utr
KCTD9	1	11	11	0.909091	0.91	1	1	11	11	1	0	0	0	0	0	0	5'utr
KDELR1	1	31	31	0.935484	0.94	1.4624	1.46	22	22	1	0	0	0	0	0	0	5'utr
KDM2A	4	111	24	3.31533	0.81	3.85878	0.96	83	17.5	3	0	0	1	0	0	0	5'utr
KDM3B	2	19	9	1.71429	0.86	1.77815	0.89	17	8.5	2	0	0	0	0	0	0	5'utr
KDM4C	1	8	8	1	1	0.90309	0.9	3	3	0	1	0	0	0	0	0	intron
KDM5A	1	9	9	0.888889	0.89	0.90309	0.9	7	7	1	0	0	0	0	0	0	5'utr
KDM5B	1	31	31	0.967742	0.97	1.47712	1.48	16	16	1	0	0	0	0	0	0	5'utr
KDM5C	4	54	9	3.23262	0.82	3.53173	0.81	45	8.5	3	0	1	0	0	0	0	coding
KDM6A	1	7	7	0.857143	0.86	0.778151	0.78	5	5	1	0	0	0	0	0	0	5'utr
KDM6B	16	185	11	14.3067	0.89	15.3707	0.95	158	10.5	2	1	9	3	0	0	0	intron
KHDRBS1	2	176	88	1.9147	0.96	3.04376	1.52	48	24	2	0	0	0	0	0	0	5'utr
KHSRP	4	137	13	3.27255	0.8	4.01881	0.97	85	13	1	2	0	1	0	0	0	3'utr
KIAA0195	1	9	9	0.888889	0.89	0.90309	0.9	6	6	0	1	0	0	0	0	0	intron
KIAA0247	1	22	22	0.863636	0.86	0.977724	0.98	16	16	0	0	0	0	0	0	0	5'utr-intron
KIAA0895	1	8	8	0.875	0.88	0.845098	0.85	8	8	1	0	0	0	0	0	0	5'utr
KIAA0895L	1	7	7	0.857143	0.86	0.778151	0.78	4	4	1	0	0	0	0	0	0	5'utr
KIAA1456	1	7	7	0.857143	0.86	0.778151	0.78	5	5	0	0	0	1	0	0	0	3'utr
KIAA1586	1	8	8	1	1	0.90309	0.9	8	8	0	0	0	0	1	0	0	start_codon
KIAA1919	1	11	11	1	1	1.04139	1.04	8	8	1	0	0	0	0	0	0	5'utr
KIAA2013	5	103	11	4.34151	0.89	4.37144	0.85	84	10	0	0	4	0	0	0	0	coding
KIAA2018	1	14	14	0.928571	0.93	1.11394	1.11	8	8	1	0	0	0	0	0	0	5'utr
KIF18A	1	10	10	1	1	1	1	5	5	0	0	1	0	0	0	0	coding
KIF20A	1	7	7	0.857143	0.86	0.778151	0.78	6	6	1	0	0	0	0	0	0	5'utr
KIF21B	3	33	9	2.6875	0.88	2.61225	0.85	26	9	0	0	0	3	0	0	0	3'utr
KIF22	1	12	12	0.916667	0.92	1.04139	1.04	11	11	0	0	1	0	0	0	0	coding
KIF2C	3	46	14	2.7619	0.93	3.11394	1.11	38	13	0	0	0	2	1	0	0	start_codon
KIF5B	3	61	18	2.74444	0.94	3.35102	1.23	44	12	3	0	0	0	0	0	0	5'utr
KIFC1	2	33	16	1.82308	0.91	2.33445	1.17	24	12	2	0	0	0	0	0	0	5'utr
KIRREL2	1	7	7	1	1	0.845098	0.85	3	3	0	0	1	0	0	0	0	coding
KLC1	2	65	32	1.88936	0.94	2.20208	1.1	46	23	2	0	0	0	0	0	0	5'utr
KLF13	17	227	13	15.2607	0.91	16.0508	0.95	188	9	4	0	0	13	0	0	0	5'utr
KLF16	8	106	10	6.38574	0.81	6.28701	0.71	94	10	0	0	0	7	1	0	0	3'utr
KLF6	1	10	10	1	1	1	1	7	7	1	0	0	0	0	0	0	5'utr
KLHL15	2	15	7	2	1	1.74819	0.87	13	6.5	1	0	0	0	0	0	0	5'utr
KLHL2	1	8	8	0.875	0.88	0.845098	0.85	8	8	1	0	0	0	0	0	0	5'utr
KLHL20	1	9	9	0.777778	0.78	0.845098	0.85	9	9	1	0	0	0	0	0	0	5'utr
KLHL28	1	8	8	1	1	0.90309	0.9	7	7	1	0	0	0	0	0	0	5'utr
KLHL36	2	21	10	1.88889	0.94	1.68124	0.84	18	9	1	0	1	0	0	0	0	5'utr
KLHL42	2	14	7	1.85714	0.93	1.62325	0.81	13	6.5	1	0	1	0	0	0	0	5'utr
KLHL7	1	8	8	1	1	0.90309	0.9	7	7	1	0	0	0	0	0	0	5'utr
KMT2B	4	30	7	3.44643	0.87	3.22531	0.81	25	6.5	0	0	3	1	0	0	0	coding
KMT2D	118	3449	19	97.2751	0.83	113.499	0.92	2860	17	0	0	96	20	0	1	0	3'utr
KMT2E	3	79	28	2.70873	0.94	3.74099	1.13	62	24	3	0	0	0	0	0	0	5'utr
KPNA2	2	78	39	1.55019	0.78	2.5977	1.3	37	18.5	2	0	0	0	0	0	0	5'utr
KPNA4	4	102	26	3.40044	0.83	4.03449	0.94	84	19	3	0	0	0	1	0	0	start_codon
KPNB1	6	164	14	5.07757	0.88	6.40893	1.02	102	10.5	3	0	1	2	0	0	0	5'utr
KRT10	2	39	19	1.6	0.8	1.87313	0.94	33	16.5	0	0	2	0	0	0	0	coding
KRTCAP2	3	33	10	2.9	1	2.75358	0.95	28	8	0	2	1	0	0	0	0	intron
KXD1	1	8	8	0.875	0.88	0.845098	0.85	5	5	1	0	0	0	0	0	0	5'utr
LAGE3	3	28	7	2.71429	0.86	2.70243	0.85	27	7	3	0	0	0	0	0	0	5'utr
LAMP1	4	52	12	3.36389	0.87	3.67761	0.92	44	9.5	2	0	0	2	0	0	0	5'utr
LAMTOR1	1	29	29	0.862069	0.86	0.920819	0.92	23	23	1	0	0	0	0	0	0	5'utr
LAMTOR4	3	59	20	2.83889	0.95	3.65896	1.28	45	16	0	0	0	2	0	1	0	stop_codon
LAMTOR5	1	192	192	0.958333	0.96	1.66276	1.66	100	100	0	0	1	0	0	0	0	coding
LAPTM4B	1	9	9	1	1	0.954243	0.95	7	7	0	0	1	0	0	0	0	coding
LAPTM5	1	10	10	0.9	0.9	0.653213	0.65	9	9	0	0	0	1	0	0	0	3'utr
LARP1	8	179	12	6.57398	0.79	7.354	0.91	117	12.5	0	4	1	3	0	0	0	intron
LARP4B	2	124	62	1.8013	0.9	2.31806	1.16	81	40.5	2	0	0	0	0	0	0	5'utr
LASP1	11	155	13	8.57712	0.79	9.72973	0.85	144	13	1	0	0	10	0	0	0	5'utr
LAT	11	776	48	9.54873	0.87	12.495	1.11	483	26	1	0	3	4	1	0	0	5'utr-intron
LAX1	3	41	9	2.69214	0.88	3.00346	0.85	33	8	0	0	1	2	0	0	0	coding
LBH	1	10	10	0.8	0.8	0.90309	0.9	9	9	1	0	0	0	0	0	0	5'utr
LBR	1	36	36	0.888889	0.89	1.20412	1.2	14	14	0	1	0	0	0	0	0	intron
LCK	4	45	11	2.8153	0.72	3.25527	0.8	41	10	0	0	3	0	1	0	0	start_codon
LCP1	6	55	9	5.02955	0.84	4.90655	0.87	51	8	1	0	0	4	0	1	0	3'utr
LCP2	1	7	7	1	1	0.845098	0.85	7	7	1	0	0	0	0	0	0	5'utr
LDB1	7	109	11	6.3261	0.88	6.07559	0.85	91	10	4	0	1	2	0	0	0	3'utr
LDHA	1	36	36	0.861111	0.86	1.19033	1.19	18	18	1	0	0	0	0	0	0	5'utr
LDHB	1	18	18	0.888889	0.89	1.20412	1.2	13	13	1	0	0	0	0	0	0	5'utr
LDLRAD4	1	9	9	0.888889	0.89	0.90309	0.9	9	9	0	1	0	0	0	0	0	intron
LDOC1L	6	77	9	5.58095	0.96	5.6425	0.87	50	7	4	0	0	2	0	0	0	3'utr
LEF1	13	1110	26	10.6604	0.81	14.8683	1.16	650	21	8	0	0	3	1	1	0	3'utr
LEMD2	1	9	9	1	1	0.954243	0.95	5	5	0	0	1	0	0	0	0	coding
LEPROTL1	2	17	8	1.75714	0.88	1.73239	0.87	16	8	2	0	0	0	0	0	0	5'utr
LETM1	1	7	7	1	1	0.845098	0.85	5	5	1	0	0	0	0	0	0	5'utr
LGALS3BP	1	10	10	1	1	1	1	9	9	1	0	0	0	0	0	0	5'utr
LGALS9	1	7	7	1	1	0.845098	0.85	7	7	1	0	0	0	0	0	0	5'utr
LHX4-AS1	2	49	24	2	1	2.5563	1.28	15	7.5	2	0	0	0	0	0	0	5'utr
LIMD2	10	340	24	8.36247	0.84	10.9195	1.04	231	18.5	2	3	0	3	0	1	0	3'utr
LIMS1	1	7	7	1	1	0.845098	0.85	5	5	0	1	0	0	0	0	0	intron
LINC00152	1	7	7	0.714286	0.71	0.69897	0.7	5	5	0	0	0	0	0	0	0	lincRNA_exon
LINC00205	2	25	12	1.88889	0.94	2.10721	1.05	22	11	0	0	0	0	0	0	0	lincRNA_exon
LINC00304	3	38	13	2.14744	0.62	2.24551	0.74	36	12	0	0	0	0	0	0	0	lincRNA_exon
LINC00324	1	19	19	0.894737	0.89	0.753328	0.75	13	13	0	0	0	0	0	0	0	lincRNA_exon
LINC00339	1	7	7	1	1	0.845098	0.85	7	7	0	0	0	0	0	0	0	lincRNA_exon
LINC00528	1	7	7	0.857143	0.86	0.778151	0.78	6	6	0	0	0	0	0	0	0	lincRNA_exon
LINC00657	22	461	16	19.606	0.89	22.6038	1.02	283	12	0	0	0	0	0	0	0	lincRNA_exon
LINC00662	1	19	19	1	1	1.27875	1.28	11	11	0	0	0	0	0	0	0	lincRNA_intron-lincRNA_exon
LINC00854	1	18	18	0.722222	0.72	0.636822	0.64	13	13	0	0	0	0	0	0	0	antisense
LINC00863	1	7	7	0.857143	0.86	0.778151	0.78	7	7	0	0	0	0	0	0	0	lincRNA_exon
LINC00909	1	9	9	0.888889	0.89	0.60206	0.6	5	5	0	0	0	0	0	0	0	lincRNA_exon
LINC01006	2	16	8	2	1	1.79934	0.9	14	7	0	0	0	0	0	0	0	lincRNA_exon
LINC01128	1	7	7	0.857143	0.86	0.778151	0.78	7	7	0	0	0	0	0	0	0	lincRNA_exon
LINC01420	1	9	9	0.888889	0.89	0.90309	0.9	6	6	0	0	0	0	0	0	0	antisense
LL22NC03-33B6.4	1	8	8	1	1	0.90309	0.9	6	6	0	0	0	0	0	0	0	processed_pseudogene
LLPH	1	10	10	0.9	0.9	0.954243	0.95	10	10	1	0	0	0	0	0	0	5'utr
LLfos-48D6.2	6	117	16	5.11604	0.89	6.42628	1.17	79	12	0	0	0	0	1	0	0	start_codon
LMAN2	1	14	14	0.857143	0.86	1.07918	1.08	13	13	0	0	1	0	0	0	0	coding
LMNB1	2	280	140	1.41406	0.71	2.97128	1.49	154	77	1	0	0	1	0	0	0	5'utr
LMNB2	7	120	13	6.32408	0.89	6.93328	0.95	98	12	0	0	1	6	0	0	0	3'utr
LMO4	2	24	12	1.94118	0.97	2.04922	1.02	21	10.5	2	0	0	0	0	0	0	5'utr
LMTK2	1	7	7	0.857143	0.86	0.778151	0.78	7	7	0	0	1	0	0	0	0	coding
LOH12CR1	1	8	8	1	1	0.845098	0.85	6	6	1	0	0	0	0	0	0	5'utr
LPAR5	4	68	17	3.23158	0.82	3.45637	0.78	62	15.5	0	0	4	0	0	0	0	coding
LPCAT1	1	7	7	0.714286	0.71	0.69897	0.7	6	6	0	0	1	0	0	0	0	coding
LPGAT1	1	10	10	0.8	0.8	0.90309	0.9	9	9	1	0	0	0	0	0	0	5'utr
LPHN1	14	172	11	11.0158	0.76	12.4853	0.93	161	11	0	0	2	12	0	0	0	3'utr
LRFN4	5	68	13	4.79474	1	5.22291	1.08	52	10	0	0	5	0	0	0	0	coding
LRP10	1	10	10	0.8	0.8	0.60206	0.6	10	10	1	0	0	0	0	0	0	5'utr
LRRC1	1	32	32	0.875	0.88	1.14613	1.15	23	23	1	0	0	0	0	0	0	5'utr
LRRC14	2	21	10	1.80909	0.9	1.95424	0.98	14	7	0	1	0	1	0	0	0	intron
LRRC28	1	7	7	1	1	0.845098	0.85	5	5	0	1	0	0	0	0	0	intron
LRRC42	1	21	21	0.952381	0.95	1.30103	1.3	12	12	1	0	0	0	0	0	0	5'utr
LRRC59	2	65	32	1.87868	0.94	2.38021	1.19	51	25.5	2	0	0	0	0	0	0	5'utr
LRRC61	3	30	10	2.46044	0.85	2.39358	0.74	28	8	2	0	1	0	0	0	0	5'utr
LRRC8A	1	7	7	0.857143	0.86	0.778151	0.78	7	7	0	0	1	0	0	0	0	coding
LRRC8B	3	28	9	2.68687	0.91	2.74819	0.9	23	7	0	1	1	0	0	0	0	5'utr-intron
LRRC8C	1	9	9	0.777778	0.78	0.845098	0.85	9	9	1	0	0	0	0	0	0	5'utr
LRRFIP1	5	60	10	4.36905	0.92	4.63468	0.85	46	9	3	0	1	0	1	0	0	5'utr
LRRFIP2	2	21	10	1.67308	0.84	1.85733	0.93	16	8	1	1	0	0	0	0	0	intron
LRWD1	2	17	8	1.75714	0.88	1.73239	0.87	17	8.5	1	0	0	0	1	0	0	5'utr
LSM1	1	22	22	0.818182	0.82	1.25527	1.26	16	16	1	0	0	0	0	0	0	5'utr
LSM10	1	31	31	0.967742	0.97	1.47712	1.48	8	8	1	0	0	0	0	0	0	5'utr
LSM14A	1	10	10	0.9	0.9	0.954243	0.95	7	7	0	0	0	0	0	0	0	nonsense_mediated_decay
LSM14B	2	17	8	1.9	0.95	1.49831	0.75	16	8	0	0	0	2	0	0	0	3'utr
LSM2	1	101	101	0.861386	0.86	1.4624	1.46	70	70	1	0	0	0	0	0	0	5'utr
LSM4	1	7	7	0.857143	0.86	0.778151	0.78	4	4	0	0	0	1	0	0	0	3'utr
LSM6	1	34	34	0.882353	0.88	1.17609	1.18	28	28	0	0	0	0	0	0	0	5'utr-intron
LSM7	1	12	12	0.916667	0.92	1.04139	1.04	12	12	0	0	0	1	0	0	0	3'utr
LSM8	1	9	9	1	1	0.954243	0.95	7	7	1	0	0	0	0	0	0	5'utr
LTB	3	44	14	2.7395	0.88	2.89209	1.08	35	12	0	0	3	0	0	0	0	coding
LTV1	2	15	7	1.85714	0.93	1.68124	0.84	14	7	2	0	0	0	0	0	0	5'utr
LUC7L	1	10	10	1	1	1	1	9	9	1	0	0	0	0	0	0	5'utr
LUC7L3	2	25	12	1.8125	0.91	2.06819	1.03	18	9	2	0	0	0	0	0	0	5'utr
LY6G5B	1	16	16	1	1	1.20412	1.2	15	15	1	0	0	0	0	0	0	5'utr
LYAR	1	13	13	0.923077	0.92	1.07918	1.08	11	11	1	0	0	0	0	0	0	5'utr
LYPD3	1	9	9	1	1	0.954243	0.95	8	8	0	0	0	0	0	0	0	intron-coding
LZTS2	1	14	14	0.857143	0.86	0.778151	0.78	13	13	1	0	0	0	0	0	0	5'utr
M6PR	2	57	28	1.95455	0.98	2.73719	1.37	35	17.5	2	0	0	0	0	0	0	5'utr
MACF1	33	407	10	28.4435	0.86	29.8966	0.85	346	9	0	3	30	0	0	0	0	intron
MAD2L1	1	27	27	0.925926	0.93	0.920819	0.92	24	24	0	0	0	0	1	0	0	start_codon
MAD2L2	1	14	14	0.857143	0.86	1.07918	1.08	12	12	1	0	0	0	0	0	0	5'utr
MAF1	1	48	48	0.916667	0.92	1.64345	1.64	43	43	1	0	0	0	0	0	0	5'utr
MAFG	2	63	31	1.81481	0.91	2.60206	1.3	50	25	1	0	0	1	0	0	0	3'utr
MAFG-AS1	1	8	8	1	1	0.90309	0.9	7	7	0	0	0	0	0	0	0	antisense
MAFK	4	44	10	3.13782	0.8	3.06258	0.76	40	10.5	2	0	0	2	0	0	0	5'utr
MAGED1	1	9	9	1	1	0.954243	0.95	7	7	1	0	0	0	0	0	0	5'utr
MAGEF1	1	18	18	1	1	1.25527	1.26	8	8	1	0	0	0	0	0	0	5'utr
MAGI3	2	19	9	1.57143	0.79	1.68124	0.84	9	4.5	0	2	0	0	0	0	0	intron
MAML1	4	81	13	3.56678	0.88	4.53343	1.04	55	9.5	3	0	1	0	0	0	0	5'utr
MAN1A1	3	31	10	2.83333	1	2.95424	1	21	6	3	0	0	0	0	0	0	5'utr
MAN1A2	1	8	8	1	1	0.90309	0.9	7	7	1	0	0	0	0	0	0	5'utr
MAN2A1	1	13	13	0.846154	0.85	1.04139	1.04	11	11	1	0	0	0	0	0	0	5'utr
MANF	3	87	25	2.65455	0.85	3.3411	1.19	65	22	1	0	1	0	1	0	0	5'utr
MAP1A	3	32	11	2.57143	0.86	2.51851	0.78	25	7	0	0	0	3	0	0	0	3'utr
MAP1LC3B	1	8	8	0.625	0.63	0.69897	0.7	8	8	1	0	0	0	0	0	0	5'utr
MAP1S	2	19	9	1.54762	0.77	1.39794	0.7	17	8.5	0	0	1	0	1	0	0	start_codon
MAP2K1	3	391	144	2.72676	0.91	4.94807	1.64	207	72	3	0	0	0	0	0	0	5'utr
MAP2K2	2	96	48	1.72571	0.86	2.76343	1.38	59	29.5	2	0	0	0	0	0	0	5'utr
MAP2K3	8	442	15	7.21137	0.9	7.85432	0.9	214	14.5	3	0	1	4	0	0	0	5'utr
MAP2K5	2	17	8	1.88889	0.94	1.50515	0.75	16	8	2	0	0	0	0	0	0	5'utr
MAP2K7	2	26	13	1.61818	0.81	1.73239	0.87	24	12	0	0	0	2	0	0	0	3'utr
MAP3K10	1	18	18	0.777778	0.78	0.669007	0.67	18	18	0	0	1	0	0	0	0	coding
MAP3K11	7	126	9	5.46841	0.78	6.32134	0.85	104	9	5	0	1	1	0	0	0	3'utr
MAP3K2	7	101	10	6.19286	0.9	6.58609	0.95	77	9	0	6	0	1	0	0	0	3'utr
MAP3K7	1	7	7	0.857143	0.86	0.778151	0.78	7	7	1	0	0	0	0	0	0	5'utr
MAP4K4	3	68	16	2.83056	0.96	3.02263	0.85	45	12	1	0	0	2	0	0	0	5'utr
MAP7D1	3	111	37	2.40946	0.81	3.48785	1.18	70	23	3	0	0	0	0	0	0	5'utr
MAPK1	2	154	77	1.95745	0.98	2.94325	1.47	50	25	2	0	0	0	0	0	0	5'utr
MAPK14	2	154	77	1.96503	0.98	2.70415	1.35	72	36	2	0	0	0	0	0	0	5'utr
MAPK1IP1L	2	22	11	1.41071	0.71	1.74036	0.87	21	10.5	2	0	0	0	0	0	0	5'utr
MAPK6	1	8	8	0.75	0.75	0.778151	0.78	7	7	0	0	1	0	0	0	0	coding
MAPKAP1	2	23	11	1.85714	0.93	1.98227	0.99	12	6	1	0	0	1	0	0	0	3'utr
MAPKAPK2	1	16	16	0.8125	0.81	1.11394	1.11	12	12	1	0	0	0	0	0	0	5'utr
MAPKAPK3	1	20	20	0.9	0.9	0.954243	0.95	17	17	1	0	0	0	0	0	0	5'utr
MAPKAPK5	1	10	10	0.9	0.9	0.954243	0.95	10	10	1	0	0	0	0	0	0	5'utr
MAPKAPK5-AS1	1	16	16	0.9375	0.94	1.17609	1.18	14	14	0	0	0	0	0	0	0	lincRNA_exon
MAPRE1	1	18	18	1	1	1.25527	1.26	16	16	1	0	0	0	0	0	0	5'utr
2019-03-05	2	38	19	1.8	0.9	2.04922	1.02	23	11.5	2	0	0	0	0	0	0	5'utr
2019-03-08	1	17	17	0.882353	0.88	0.875061	0.88	16	16	1	0	0	0	0	0	0	5'utr
MARCKSL1	3	107	31	2.27791	0.74	3.15259	0.91	61	15	2	0	0	1	0	0	0	3'utr
MARK2	7	105	11	6.27609	0.89	6.38907	0.85	94	11	3	0	1	3	0	0	0	5'utr
MARK3	2	14	7	1.85714	0.93	1.62325	0.81	11	5.5	2	0	0	0	0	0	0	5'utr
MARK4	2	27	13	1.93333	0.97	1.92428	0.96	21	10.5	2	0	0	0	0	0	0	5'utr
MAST3	1	7	7	1	1	0.845098	0.85	7	7	0	0	0	1	0	0	0	3'utr
MAT2B	1	74	74	0.918919	0.92	1.53148	1.53	44	44	0	0	0	0	1	0	0	start_codon
MATR3	1	21	21	0.952381	0.95	1	1	17	17	1	0	0	0	0	0	0	5'utr
MAX	2	37	18	1.86667	0.93	2.19312	1.1	34	17	1	0	1	0	0	0	0	coding
MAZ	23	794	23	19.1535	0.84	24.9507	1.04	579	16	0	1	11	6	1	1	0	coding
MBD1	2	15	7	1.875	0.94	1.6902	0.85	12	6	0	0	1	0	1	0	0	coding
MBD2	1	16	16	0.8125	0.81	0.812913	0.81	16	16	0	0	1	0	0	0	0	coding
MBD3	34	1239	20	28.4201	0.83	32.9429	0.9	1008	16.5	0	11	5	14	2	2	0	3'utr
MBD4	1	26	26	0.923077	0.92	1.38021	1.38	18	18	0	0	0	0	1	0	0	start_codon
MBD6	2	20	10	1.625	0.81	1.77815	0.89	20	10	1	0	0	1	0	0	0	5'utr
MBIP	1	10	10	0.7	0.7	0.845098	0.85	10	10	1	0	0	0	0	0	0	5'utr
MBNL1	2	18	9	1.71429	0.86	1.74036	0.87	12	6	1	0	0	1	0	0	0	5'utr
MBNL3	1	7	7	1	1	0.845098	0.85	4	4	0	0	0	1	0	0	0	3'utr
MBOAT7	5	83	16	4.29401	0.86	4.76582	0.78	69	13	3	0	1	1	0	0	0	3'utr
MBTPS1	3	25	7	2.22078	0.86	2.22531	0.78	19	7	2	0	0	1	0	0	0	3'utr
MCFD2	1	7	7	0.857143	0.86	0.778151	0.78	7	7	1	0	0	0	0	0	0	5'utr
MCL1	6	59	9	4.90934	0.83	4.96666	0.85	57	9	0	0	3	3	0	0	0	3'utr
MCM3	1	8	8	1	1	0.90309	0.9	8	8	0	0	0	0	1	0	0	start_codon
MCM3AP	1	10	10	1	1	1	1	6	6	1	0	0	0	0	0	0	5'utr
MCM4	1	14	14	1	1	1.14613	1.15	9	9	0	0	0	0	0	0	0	nonsense_mediated_decay
MCM7	1	48	48	0.958333	0.96	1.36173	1.36	27	27	1	0	0	0	0	0	0	5'utr
MCMBP	3	88	31	2.48202	0.87	3.60842	1.04	53	18	3	0	0	0	0	0	0	5'utr
MCRS1	1	7	7	1	1	0.845098	0.85	7	7	1	0	0	0	0	0	0	5'utr
MCTS1	1	12	12	0.833333	0.83	1	1	10	10	1	0	0	0	0	0	0	5'utr
MCUR1	2	52	26	1.71818	0.86	2.68664	1.34	33	16.5	1	0	0	0	1	0	0	start_codon
MDC1	1	13	13	0.923077	0.92	1.07918	1.08	8	8	1	0	0	0	0	0	0	5'utr
MDGA1	1	7	7	1	1	0.845098	0.85	5	5	1	0	0	0	0	0	0	5'utr
MDH2	1	12	12	0.75	0.75	0.954243	0.95	12	12	0	0	0	0	1	0	0	start_codon
MDM2	2	22	11	1.85714	0.93	1.95424	0.98	19	9.5	0	0	1	1	0	0	0	coding
MED10	1	9	9	1	1	0.954243	0.95	9	9	0	0	0	1	0	0	0	3'utr
MED13	2	66	33	1.68534	0.84	2.04007	1.02	56	28	0	0	1	0	1	0	0	coding
MED13L	2	37	18	1.75667	0.88	1.58546	0.79	27	13.5	2	0	0	0	0	0	0	5'utr
MED17	2	34	17	2	1	2.31806	1.16	23	11.5	2	0	0	0	0	0	0	5'utr
MED30	2	32	16	1.86147	0.93	1.69897	0.85	22	11	2	0	0	0	0	0	0	5'utr
MEF2A	2	18	9	1.625	0.81	1.69897	0.85	15	7.5	2	0	0	0	0	0	0	5'utr
MEF2D	7	86	12	5.7119	0.83	6.19073	0.78	78	10	4	0	1	2	0	0	0	3'utr
MELK	1	20	20	0.9	0.9	0.954243	0.95	13	13	1	0	0	0	0	0	0	5'utr
MEN1	2	19	9	1.69048	0.85	1.47712	0.74	18	9	2	0	0	0	0	0	0	5'utr
MEPCE	9	237	12	8.32387	0.95	10.4737	1.08	165	12	3	0	2	1	0	0	0	retained_intron
MESDC1	18	488	24	15.2236	0.87	18.7919	0.93	361	16.5	11	0	6	0	1	0	0	5'utr
METTL10	1	17	17	0.764706	0.76	1.11394	1.11	12	12	0	0	1	0	0	0	0	coding
METTL23	2	57	28	1.81905	0.91	2.11394	1.06	41	20.5	2	0	0	0	0	0	0	5'utr
METTL5	1	30	30	0.9	0.9	1.43136	1.43	16	16	0	0	0	0	0	0	0	5'utr-intron
METTL9	1	14	14	0.714286	0.71	0.69897	0.7	12	12	1	0	0	0	0	0	0	5'utr
MEX3B	1	8	8	0.875	0.88	0.845098	0.85	5	5	1	0	0	0	0	0	0	5'utr
MEX3C	2	24	12	1.02857	0.51	1.5563	0.78	23	11.5	0	2	0	0	0	0	0	intron
MEX3D	4	66	11	3.36028	0.85	3.18089	0.77	50	8.5	0	0	3	1	0	0	0	3'utr
MFAP1	1	7	7	1	1	0.845098	0.85	5	5	1	0	0	0	0	0	0	5'utr
MFF	1	40	40	1	1	1.60206	1.6	19	19	1	0	0	0	0	0	0	5'utr
MFHAS1	8	128	15	6.57702	0.8	8.43755	1.06	96	11.5	3	1	3	0	1	0	0	intron
MFNG	2	18	9	1.90909	0.95	1.8451	0.92	16	8	0	1	0	1	0	0	0	3'utr
MFSD12	1	13	13	0.923077	0.92	0.778151	0.78	10	10	1	0	0	0	0	0	0	5'utr
MGAT1	4	58	15	3.12228	0.78	3.34341	0.77	45	10	2	0	2	0	0	0	0	coding
MGAT2	1	22	22	0.863636	0.86	1.27875	1.28	11	11	1	0	0	0	0	0	0	5'utr
MGAT5	1	12	12	1	1	1.07918	1.08	4	4	0	0	0	1	0	0	0	3'utr
MGEA5	2	24	12	1.93333	0.97	2.10037	1.05	22	11	2	0	0	0	0	0	0	5'utr
MGRN1	1	7	7	0.857143	0.86	0.778151	0.78	7	7	0	0	0	1	0	0	0	3'utr
MIB1	1	15	15	0.933333	0.93	1.14613	1.15	14	14	0	0	0	0	0	0	0	processed_transcript
MID1IP1	4	75	13	3.79737	0.94	4.14176	1.02	40	10	3	0	0	1	0	0	0	5'utr
MIDN	21	1484	14	18.0207	0.86	21.8655	1	725	12	4	0	5	11	0	0	0	5'utr
MIEF1	2	18	9	1.775	0.89	1.79934	0.9	16	8	0	0	2	0	0	0	0	coding
MIEN1	1	11	11	1	1	1.04139	1.04	6	6	0	0	1	0	0	0	0	coding
MIER2	1	7	7	0.857143	0.86	0.778151	0.78	6	6	0	0	0	1	0	0	0	3'utr
MIF	5	67	10	4.775	1	5.35564	1	55	10	1	0	3	1	0	0	0	5'utr
MINOS1	1	7	7	0.857143	0.86	0.778151	0.78	7	7	0	0	0	0	1	0	0	start_codon
MINOS1-NBL1	1	10	10	0.9	0.9	0.954243	0.95	10	10	0	1	0	0	0	0	0	intron
MIOS	1	7	7	0.857143	0.86	0.778151	0.78	7	7	1	0	0	0	0	0	0	5'utr
MIR101-1	1	78	78	0.948718	0.95	1.17026	1.17	13	13	0	0	0	0	0	0	0	miRNA
MIR101-2	1	40	40	0.475	0.48	0.801632	0.8	14	14	0	0	0	0	0	0	0	miRNA
MIR103A1	1	103	103	0.737864	0.74	0.734686	0.73	16	16	0	0	0	0	0	0	0	miRNA
MIR103A2	1	129	129	0.395349	0.4	0.929419	0.93	20	20	0	0	0	0	0	0	0	miRNA
MIR106B	2	161	80	1.22611	0.61	1.32906	0.66	39	19.5	0	0	0	0	0	0	0	miRNA
MIR125A	1	10	10	0.9	0.9	0.954243	0.95	6	6	0	0	0	0	0	0	0	miRNA
MIR128-1	1	75	75	0.4	0.4	0.778151	0.78	16	16	0	0	0	0	0	0	0	miRNA
MIR1281	1	86	86	0.744186	0.74	1.32906	1.33	52	52	0	0	0	0	0	0	0	miRNA
MIR1301	1	8	8	0.875	0.88	0.845098	0.85	7	7	0	0	0	0	0	0	0	miRNA
MIR130B	1	126	126	0.873016	0.87	1.34242	1.34	14	14	0	0	0	0	0	0	0	miRNA
MIR132	2	70	35	1.78571	0.89	2.49415	1.25	22	11	0	0	0	0	0	0	0	miRNA
MIR140	2	66	33	1.30235	0.65	1.8739	0.94	22	11	0	0	0	0	0	0	0	miRNA
MIR141	1	63	63	0.920635	0.92	1.4624	1.46	12	12	0	0	0	0	0	0	0	miRNA
MIR142	2	2200	1100	1.41216	0.71	2.312	1.16	175	87.5	0	0	0	0	0	0	0	miRNA
MIR146A	1	53	53	0.886792	0.89	1.07004	1.07	12	12	0	0	0	0	0	0	0	miRNA
MIR148B	1	31	31	0.870968	0.87	1.43136	1.43	3	3	0	0	0	0	0	0	0	miRNA
MIR15A	1	115	115	0.66087	0.66	0.704722	0.7	25	25	0	0	0	0	0	0	0	miRNA
MIR15B	1	80	80	0.7	0.7	1.14613	1.15	13	13	0	0	0	0	0	0	0	miRNA
MIR16-1	2	161	80	1.31046	0.66	1.58154	0.79	19	9.5	0	0	0	0	0	0	0	miRNA
MIR16-2	1	230	230	0.721739	0.72	1.61805	1.62	17	17	0	0	0	0	0	0	0	miRNA
MIR17	2	602	301	1.10225	0.55	1.4005	0.7	83	41.5	0	0	0	0	0	0	0	miRNA
MIR181A1	1	23	23	0.782609	0.78	0.778151	0.78	13	13	0	0	0	0	0	0	0	miRNA
MIR181A1HG	1	8	8	0.875	0.88	0.845098	0.85	8	8	0	0	0	0	0	0	0	lincRNA_exon
MIR181A2	1	899	899	0.61624	0.62	1.04454	1.04	60	60	0	0	0	0	0	0	0	miRNA
MIR181B1	1	340	340	0.738235	0.74	0.9847	0.98	50	50	0	0	0	0	0	0	0	miRNA
MIR181B2	1	503	503	0.755467	0.76	1.07463	1.07	57	57	0	0	0	0	0	0	0	miRNA
MIR181D	1	21	21	0.904762	0.9	0.977724	0.98	12	12	0	0	0	0	0	0	0	miRNA
MIR182	1	43	43	0.651163	0.65	0.845098	0.85	28	28	0	0	0	0	0	0	0	miRNA
MIR183	1	61	61	0.606557	0.61	1.09108	1.09	21	21	0	0	0	0	0	0	0	miRNA
MIR185	1	7	7	0.714286	0.71	0.69897	0.7	5	5	0	0	0	0	0	0	0	miRNA
MIR186	1	34	34	0.529412	0.53	1.25527	1.26	17	17	0	0	0	0	0	0	0	miRNA
MIR188	1	18	18	0.722222	0.72	0.636822	0.64	9	9	0	0	0	0	0	0	0	miRNA
MIR18A	1	106	106	0.462264	0.46	0.648803	0.65	24	24	0	0	0	0	0	0	0	miRNA
MIR18B	1	16	16	0.6875	0.69	1.04139	1.04	9	9	0	0	0	0	0	0	0	miRNA
MIR1909	1	15	15	0.866667	0.87	1.11394	1.11	13	13	0	0	0	0	0	0	0	miRNA
MIR191	1	133	133	0.556391	0.56	0.966142	0.97	19	19	0	0	0	0	0	0	0	miRNA
MIR192	1	71	71	0.943662	0.94	1.52504	1.53	19	19	0	0	0	0	0	0	0	miRNA
MIR193B	1	7	7	0.571429	0.57	0.60206	0.6	5	5	0	0	0	0	0	0	0	miRNA
MIR194-2	1	16	16	0.625	0.63	1	1	4	4	0	0	0	0	0	0	0	miRNA
MIR196A2	1	19	19	0.684211	0.68	1.11394	1.11	7	7	0	0	0	0	0	0	0	miRNA
MIR197	1	32	32	0.78125	0.78	1.09691	1.1	10	10	0	0	0	0	0	0	0	miRNA
MIR19A	1	206	206	0.728155	0.73	1.33099	1.33	17	17	0	0	0	0	0	0	0	miRNA
MIR19B2	1	510	510	0.65098	0.65	1.47975	1.48	11	11	0	0	0	0	0	0	0	miRNA
MIR200C	1	60	60	0.6	0.6	0.60206	0.6	19	19	0	0	0	0	0	0	0	miRNA
MIR203A	1	9	9	0.555556	0.56	0.69897	0.7	8	8	0	0	0	0	0	0	0	miRNA
MIR20A	1	524	524	0.652672	0.65	1.08687	1.09	47	47	0	0	0	0	0	0	0	miRNA
MIR21	2	264	132	1.60914	0.8	1.83483	0.92	37	18.5	0	0	0	0	0	0	0	miRNA
MIR2110	1	8	8	0.875	0.88	0.845098	0.85	8	8	0	0	0	0	0	0	0	miRNA
MIR22	1	76	76	0.894737	0.89	1.83251	1.83	5	5	0	0	0	0	0	0	0	miRNA
MIR221	1	18	18	0.888889	0.89	0.90309	0.9	9	9	0	0	0	0	0	0	0	miRNA
MIR222	1	55	55	0.727273	0.73	1	1	26	26	0	0	0	0	0	0	0	miRNA
MIR23A	1	8	8	0.75	0.75	0.778151	0.78	7	7	0	0	0	0	0	0	0	miRNA
MIR25	1	155	155	0.722581	0.72	1.00783	1.01	22	22	0	0	0	0	0	0	0	miRNA
MIR26B	1	86	86	0.767442	0.77	1.04139	1.04	11	11	0	0	0	0	0	0	0	miRNA
MIR27A	1	55	55	0.527273	0.53	0.6173	0.62	14	14	0	0	0	0	0	0	0	miRNA
MIR27B	1	12	12	0.5	0.5	0.778151	0.78	5	5	0	0	0	0	0	0	0	miRNA
MIR28	1	24	24	0.791667	0.79	0.801632	0.8	11	11	0	0	0	0	0	0	0	miRNA
MIR296	1	22	22	0.818182	0.82	1.25527	1.26	11	11	0	0	0	0	0	0	0	miRNA
MIR29A	1	162	162	0.703704	0.7	1.15381	1.15	27	27	0	0	0	0	0	0	0	miRNA
MIR29B1	1	97	97	0.814433	0.81	1.29557	1.3	18	18	0	0	0	0	0	0	0	miRNA
MIR29B2	1	51	51	0.607843	0.61	0.792392	0.79	20	20	0	0	0	0	0	0	0	miRNA
MIR29C	1	120	120	0.616667	0.62	0.755288	0.76	24	24	0	0	0	0	0	0	0	miRNA
MIR301A	1	14	14	0.857143	0.86	1.07918	1.08	11	11	0	0	0	0	0	0	0	miRNA
MIR30C2	1	8	8	1	1	0.90309	0.9	4	4	0	0	0	0	0	0	0	miRNA
MIR30E	1	141	141	0.744681	0.74	1.02119	1.02	17	17	0	0	0	0	0	0	0	miRNA
MIR3176	2	70	35	1.38587	0.69	1.39794	0.7	58	29	0	0	0	0	0	0	0	miRNA
MIR3198-2	1	9	9	0.666667	0.67	0.778151	0.78	6	6	0	0	0	0	0	0	0	miRNA
MIR32	1	61	61	0.803279	0.8	1.21307	1.21	17	17	0	0	0	0	0	0	0	miRNA
MIR320A	1	207	207	0.855072	0.86	0.96922	0.97	29	29	0	0	0	0	0	0	0	miRNA
MIR33A	1	79	79	0.594937	0.59	1.07004	1.07	18	18	0	0	0	0	0	0	0	miRNA
MIR342	2	59	29	1.4214	0.71	1.69897	0.85	28	14	0	0	0	0	0	0	0	miRNA
MIR361	1	50	50	0.68	0.68	0.832509	0.83	9	9	0	0	0	0	0	0	0	miRNA
MIR3610	1	57	57	0.859649	0.86	0.912045	0.91	25	25	0	0	0	0	0	0	0	miRNA
MIR3615	1	94	94	0.87234	0.87	1.61278	1.61	71	71	0	0	0	0	0	0	0	miRNA
MIR362	1	7	7	0.714286	0.71	0.69897	0.7	5	5	0	0	0	0	0	0	0	miRNA
MIR363	1	156	156	0.679487	0.68	0.879178	0.88	35	35	0	0	0	0	0	0	0	miRNA
MIR3652	1	32	32	1	1	1.50515	1.51	15	15	0	0	0	0	0	0	0	miRNA
MIR3687-1	1	10	10	0.9	0.9	0.653213	0.65	7	7	0	0	0	0	0	0	0	miRNA
MIR3917	1	59	59	0.949153	0.95	1.44716	1.45	37	37	0	0	0	0	0	0	0	miRNA
MIR423	1	280	280	0.646429	0.65	0.895951	0.9	45	45	0	0	0	0	0	0	0	miRNA
MIR424	1	53	53	0.698113	0.7	1.09108	1.09	15	15	0	0	0	0	0	0	0	miRNA
MIR425	1	59	59	0.677966	0.68	0.823909	0.82	29	29	0	0	0	0	0	0	0	miRNA
MIR4321	1	16	16	0.8125	0.81	1.11394	1.11	15	15	0	0	0	0	0	0	0	miRNA
MIR4442	1	12	12	0.75	0.75	0.653213	0.65	12	12	0	0	0	0	0	0	0	miRNA
MIR4479	1	8	8	1	1	0.90309	0.9	5	5	0	0	0	0	0	0	0	miRNA
MIR449A	1	9	9	1	1	0.954243	0.95	6	6	0	0	0	0	0	0	0	miRNA
MIR4523	1	23	23	0.913043	0.91	1.32222	1.32	12	12	0	0	0	0	0	0	0	miRNA
MIR4687	2	33	16	1.63095	0.82	1.74036	0.87	29	14.5	0	0	0	0	0	0	0	miRNA
MIR4707	1	32	32	0.71875	0.72	0.884607	0.88	23	23	0	0	0	0	0	0	0	miRNA
MIR4741	1	10	10	0.8	0.8	0.60206	0.6	8	8	0	0	0	0	0	0	0	miRNA
MIR484	1	184	184	0.728261	0.73	1.08571	1.09	27	27	0	0	0	0	0	0	0	miRNA
MIR503	1	12	12	0.75	0.75	0.954243	0.95	7	7	0	0	0	0	0	0	0	miRNA
MIR505	1	7	7	0.571429	0.57	0.60206	0.6	6	6	0	0	0	0	0	0	0	miRNA
MIR5703	1	20	20	0.8	0.8	0.726999	0.73	18	18	0	0	0	0	0	0	0	miRNA
MIR625	1	7	7	0.857143	0.86	0.778151	0.78	5	5	0	0	0	0	0	0	0	miRNA
MIR632	1	378	378	0.89418	0.89	1.48752	1.49	113	113	0	0	0	0	0	0	0	miRNA
MIR6501	1	8	8	1	1	0.90309	0.9	5	5	0	0	0	0	0	0	0	miRNA
MIR652	1	11	11	0.818182	0.82	0.653213	0.65	6	6	0	0	0	0	0	0	0	miRNA
MIR658	1	9	9	1	1	0.954243	0.95	7	7	0	0	0	0	0	0	0	miRNA
MIR660	1	15	15	0.866667	0.87	0.812913	0.81	7	7	0	0	0	0	0	0	0	miRNA
MIR663AHG	1	7	7	1	1	0.845098	0.85	3	3	0	0	0	0	0	0	0	lincRNA_exon
MIR671	1	50	50	0.74	0.74	0.665112	0.67	23	23	0	0	0	0	0	0	0	miRNA
MIR7-1	1	18	18	0.833333	0.83	1.17609	1.18	9	9	0	0	0	0	0	0	0	miRNA
MIR7-2	1	15	15	0.8	0.8	1.07918	1.08	8	8	0	0	0	0	0	0	0	miRNA
MIR9-2	1	35	35	0.971429	0.97	1.23045	1.23	7	7	0	0	0	0	0	0	0	miRNA
MIR9-3	1	39	39	0.410256	0.41	0.90309	0.9	13	13	0	0	0	0	0	0	0	miRNA
MIR92A1	1	799	799	0.593242	0.59	0.862865	0.86	35	35	0	0	0	0	0	0	0	miRNA
MIR92A2	1	329	329	0.927052	0.93	1.10409	1.1	25	25	0	0	0	0	0	0	0	miRNA
MIR93	2	431	215	1.3304	0.67	2.31958	1.16	52	26	0	0	0	0	0	0	0	miRNA
MIR942	1	8	8	0.875	0.88	0.845098	0.85	7	7	0	0	0	0	0	0	0	miRNA
MIR98	1	27	27	0.740741	0.74	0.69897	0.7	14	14	0	0	0	0	0	0	0	miRNA
MIRLET7A2	1	129	129	0.565891	0.57	1.16435	1.16	9	9	0	0	0	0	0	0	0	miRNA
MIRLET7A3	1	151	151	0.821192	0.82	1.05203	1.05	17	17	0	0	0	0	0	0	0	miRNA
MIRLET7B	1	271	271	0.774908	0.77	1	1	40	40	0	0	0	0	0	0	0	miRNA
MIRLET7F1	1	246	246	0.646341	0.65	1.2014	1.2	21	21	0	0	0	0	0	0	0	miRNA
MIRLET7F2	1	139	139	0.892086	0.89	0.889302	0.89	17	17	0	0	0	0	0	0	0	miRNA
MIRLET7G	1	264	264	0.746212	0.75	1.18052	1.18	33	33	0	0	0	0	0	0	0	miRNA
MIRLET7I	2	530	265	1.55229	0.78	2.08801	1.04	47	23.5	0	0	0	0	0	0	0	miRNA
MIS12	1	13	13	0.923077	0.92	1.07918	1.08	9	9	1	0	0	0	0	0	0	5'utr
MKI67	11	499	17	9.61362	0.87	10.9179	0.9	286	11	3	0	3	4	0	0	0	3'utr
MKL1	1	23	23	0.956522	0.96	1.34242	1.34	10	10	1	0	0	0	0	0	0	5'utr
MKNK2	1	12	12	0.833333	0.83	1	1	9	9	0	0	1	0	0	0	0	coding
MKRN1	2	31	15	1.8114	0.91	2.27184	1.14	23	11.5	2	0	0	0	0	0	0	5'utr
MLEC	4	41	9	3.88889	1	3.65128	0.95	29	7	3	0	0	0	1	0	0	5'utr
MLF2	3	59	9	2.79587	0.91	2.73719	0.9	30	7	1	0	1	1	0	0	0	3'utr
MLKL	2	26	13	1.94118	0.97	2.15836	1.08	20	10	2	0	0	0	0	0	0	5'utr
MLLT1	11	172	10	9.43779	0.85	10.7839	0.9	136	10	1	0	0	10	0	0	0	3'utr
MLLT10	1	18	18	0.823529	0.82	1.14613	1.15	13	13	1	0	0	0	0	0	0	5'utr
MLLT6	6	60	8	5.33207	0.88	5.22877	0.87	47	7.5	0	0	1	5	0	0	0	coding
MLXIP	1	20	20	0.9	0.9	1.25527	1.26	13	13	0	0	1	0	0	0	0	coding
MMADHC	1	27	27	0.925926	0.93	0.920819	0.92	17	17	0	0	0	0	0	0	0	5'utr-intron
MMGT1	1	14	14	0.857143	0.86	0.778151	0.78	13	13	1	0	0	0	0	0	0	5'utr
MMP24-AS1	2	19	9	1.75	0.88	1.49831	0.75	16	8	0	0	0	0	0	0	0	antisense
MNT	1	7	7	0.857143	0.86	0.778151	0.78	6	6	0	0	0	1	0	0	0	3'utr
MNX1	1	9	9	0.888889	0.89	0.90309	0.9	8	8	1	0	0	0	0	0	0	5'utr
MOAP1	2	22	11	1.72727	0.86	1.94448	0.97	19	9.5	2	0	0	0	0	0	0	5'utr
MOB1A	2	107	53	1.81028	0.91	2.76155	1.38	57	28.5	1	0	0	0	0	0	0	5'utr
MOB3A	15	266	11	13.5751	0.91	14.9708	0.95	195	10	2	0	1	12	0	0	0	3'utr
MON1B	1	7	7	1	1	0.845098	0.85	5	5	0	0	0	1	0	0	0	3'utr
MORF4L1	2	195	97	1.57429	0.79	2.37291	1.19	49	24.5	1	0	0	0	0	0	0	processed_transcript
MORF4L2	1	29	29	0.862069	0.86	1.09691	1.1	28	28	1	0	0	0	0	0	0	5'utr
MOSPD3	1	7	7	1	1	0.845098	0.85	5	5	1	0	0	0	0	0	0	5'utr
MPC2	1	9	9	0.888889	0.89	0.90309	0.9	5	5	1	0	0	0	0	0	0	5'utr
MPDU1	1	14	14	0.785714	0.79	0.740363	0.74	14	14	0	0	0	1	0	0	0	3'utr
MPG	1	14	14	0.857143	0.86	1.07918	1.08	12	12	0	1	0	0	0	0	0	intron
MPLKIP	2	43	21	1.9375	0.97	2.60746	1.3	22	11	0	0	2	0	0	0	0	coding
MPRIP	2	23	11	1.40833	0.7	1.44716	0.72	20	10	0	0	0	2	0	0	0	3'utr
MRFAP1	4	37	8	3.76389	0.94	3.70723	0.87	34	8	0	0	0	1	1	0	0	5'utr-intron
MRFAP1L1	1	10	10	0.9	0.9	0.954243	0.95	10	10	1	0	0	0	0	0	0	5'utr
MRM1	1	14	14	0.928571	0.93	0.812913	0.81	8	8	1	0	0	0	0	0	0	5'utr
MRPL16	1	17	17	1	1	1.23045	1.23	11	11	1	0	0	0	0	0	0	5'utr
MRPL18	1	10	10	0.9	0.9	0.954243	0.95	7	7	1	0	0	0	0	0	0	5'utr
MRPL20	2	34	17	1.82784	0.91	2.35793	1.18	26	13	0	0	1	0	1	0	0	coding
MRPL21	1	7	7	0.857143	0.86	0.778151	0.78	6	6	0	0	1	0	0	0	0	coding
MRPL3	3	58	16	2.73737	0.89	3.55437	1.2	41	12	1	0	1	0	1	0	0	coding
MRPL34	1	15	15	0.933333	0.93	1.14613	1.15	10	10	0	0	0	0	0	0	0	intron-5'utr
MRPL4	2	61	30	1.90428	0.95	2.9058	1.45	42	21	1	0	0	0	0	0	0	5'utr
MRPL43	2	18	9	1.775	0.89	1.79934	0.9	13	6.5	1	0	1	0	0	0	0	coding
MRPL48	1	9	9	1	1	0.954243	0.95	5	5	1	0	0	0	0	0	0	5'utr
MRPL52	4	91	17	3.65363	0.91	4.29171	1.04	66	11.5	1	0	2	0	1	0	0	start_codon
MRPL55	2	18	9	1.76623	0.88	1.77815	0.89	16	8	2	0	0	0	0	0	0	5'utr
MRPS12	1	8	8	0.875	0.88	0.845098	0.85	8	8	0	0	0	0	0	1	0	stop_codon
MRPS16	2	27	13	1.8	0.9	2.04922	1.02	25	12.5	2	0	0	0	0	0	0	5'utr
MRPS21	1	15	15	0.933333	0.93	1.14613	1.15	12	12	0	0	0	0	0	0	0	5'utr-intron
MRPS24	1	24	24	0.958333	0.96	1.36173	1.36	19	19	0	0	0	0	0	1	0	stop_codon
MRPS25	2	132	66	1.984	0.99	2.935	1.47	15	7.5	2	0	0	0	0	0	0	5'utr
MRPS33	1	13	13	0.692308	0.69	0.954243	0.95	10	10	1	0	0	0	0	0	0	5'utr
MRPS34	1	15	15	0.933333	0.93	1.14613	1.15	12	12	0	0	1	0	0	0	0	coding
MRPS6	2	37	18	1.66964	0.83	1.41497	0.71	27	13.5	2	0	0	0	0	0	0	5'utr
MRPS7	2	27	13	1.62353	0.81	1.44716	0.72	24	12	1	0	1	0	0	0	0	5'utr
MSI2	1	17	17	0.823529	0.82	0.845098	0.85	13	13	1	0	0	0	0	0	0	5'utr
MSL1	3	47	14	2.59524	0.83	2.87313	1	35	10	1	0	2	0	0	0	0	5'utr
MSL2	3	56	20	2.40833	0.75	2.86139	0.95	49	17	3	0	0	0	0	0	0	5'utr
MSMO1	1	8	8	1	1	0.90309	0.9	7	7	1	0	0	0	0	0	0	5'utr
MSN	10	170	15	8.74402	0.88	9.67349	1	138	13	0	0	1	9	0	0	0	coding
MST4	2	24	12	1.88889	0.94	1.77815	0.89	16	8	2	0	0	0	0	0	0	5'utr
MT2A	3	144	39	2.77002	0.92	4.32123	1.56	61	8	0	0	0	2	1	0	0	start_codon
MT2P1	1	16	16	0.375	0.38	0.778151	0.78	9	9	0	0	0	0	0	0	0	processed_pseudogene
MTA2	10	411	15	8.93608	0.94	9.57605	0.92	255	14	4	0	2	3	0	1	0	3'utr
MTDH	2	18	9	1.7	0.85	1.74819	0.87	17	8.5	1	0	1	0	0	0	0	5'utr
MTF2	3	42	9	2.53297	0.96	2.65321	0.95	25	9	3	0	0	0	0	0	0	5'utr
MTFP1	1	16	16	0.875	0.88	1.14613	1.15	13	13	1	0	0	0	0	0	0	5'utr
MTFR2	1	22	22	0.863636	0.86	1.27875	1.28	22	22	0	0	0	0	0	0	0	5'utr-intron
MTHFD2	2	34	17	1.70833	0.85	2.32222	1.16	29	14.5	0	0	1	0	1	0	0	start_codon
MTMR1	1	11	11	0.727273	0.73	0.90309	0.9	10	10	1	0	0	0	0	0	0	5'utr
MTMR4	1	9	9	1	1	0.954243	0.95	8	8	0	0	0	1	0	0	0	3'utr
MTMR6	1	7	7	1	1	0.845098	0.85	4	4	1	0	0	0	0	0	0	5'utr
MTMR9	1	8	8	1	1	0.90309	0.9	5	5	1	0	0	0	0	0	0	5'utr
MTPN	2	31	15	1.77381	0.89	1.81954	0.91	29	14.5	1	0	0	1	0	0	0	3'utr
MTSS1L	1	8	8	1	1	0.90309	0.9	5	5	1	0	0	0	0	0	0	5'utr
MTX2	1	17	17	1	1	1.23045	1.23	15	15	1	0	0	0	0	0	0	5'utr
MUL1	2	33	16	1.44048	0.72	1.79934	0.9	24	12	2	0	0	0	0	0	0	5'utr
MUS81	2	37	18	1.93103	0.97	2.33445	1.17	22	11	2	0	0	0	0	0	0	5'utr
MVD	1	13	13	0.846154	0.85	0.740363	0.74	12	12	0	0	0	1	0	0	0	3'utr
MVP	1	8	8	1	1	0.90309	0.9	8	8	0	1	0	0	0	0	0	intron
MXD1	1	7	7	0.571429	0.57	0.60206	0.6	6	6	1	0	0	0	0	0	0	5'utr
MYB	3	59	14	2.74351	0.92	3.32469	1.08	51	11	0	0	1	1	1	0	0	start_codon
MYBL2	3	41	17	2.53782	0.88	3.07918	1.18	26	9	2	0	0	1	0	0	0	5'utr
MYC	3	31	10	2.34423	0.77	2.6902	0.85	29	10	3	0	0	0	0	0	0	5'utr
MYCBP2	1	8	8	0.875	0.88	0.845098	0.85	8	8	0	0	0	0	0	0	0	processed_transcript
MYD88	1	9	9	0.888889	0.89	0.60206	0.6	9	9	0	0	0	1	0	0	0	3'utr
MYEOV2	2	14	7	1.85714	0.93	1.62325	0.81	12	6	0	2	0	0	0	0	0	intron
MYH10	1	7	7	1	1	0.845098	0.85	7	7	1	0	0	0	0	0	0	5'utr
MYH9	1	43	43	0.953488	0.95	1.61278	1.61	24	24	1	0	0	0	0	0	0	5'utr
MYL12A	1	29	29	0.965517	0.97	1.44716	1.45	21	21	1	0	0	0	0	0	0	5'utr
MYL12B	2	43	21	1.80769	0.9	2.07555	1.04	33	16.5	1	0	0	0	0	0	0	5'utr
MYL6	1	8	8	1	1	0.90309	0.9	8	8	1	0	0	0	0	0	0	5'utr
MYO1G	8	84	9	7.21387	0.89	7.31229	0.9	77	9	0	1	6	0	0	1	0	coding
MYSM1	1	12	12	0.666667	0.67	0.60206	0.6	12	12	0	0	1	0	0	0	0	coding
MZT2A	1	8	8	1	1	0.90309	0.9	6	6	0	0	0	0	1	0	0	start_codon
MZT2B	1	13	13	0.846154	0.85	1.04139	1.04	11	11	0	0	0	0	1	0	0	start_codon
Metazoa_SRP	3	26	9	2.19444	0.75	2.4014	0.78	17	5	0	0	0	0	0	0	0	misc_RNA
N4BP1	1	10	10	0.9	0.9	0.954243	0.95	7	7	0	0	1	0	0	0	0	coding
N4BP2	1	10	10	0.7	0.7	0.845098	0.85	10	10	1	0	0	0	0	0	0	5'utr
NAA15	2	21	10	1.66667	0.83	1.85733	0.93	19	9.5	2	0	0	0	0	0	0	5'utr
NAA20	1	7	7	0.714286	0.71	0.69897	0.7	6	6	0	0	1	0	0	0	0	coding
NAA30	1	11	11	1	1	1.04139	1.04	9	9	1	0	0	0	0	0	0	5'utr
NAA35	2	17	8	1.8	0.9	1.44716	0.72	15	7.5	1	1	0	0	0	0	0	intron
NAA38	2	16	8	1.63492	0.82	1.62325	0.81	15	7.5	1	0	1	0	0	0	0	coding
NAA50	3	91	20	2.59245	0.8	3.48058	1.26	62	16	3	0	0	0	0	0	0	5'utr
NAA60	5	46	7	4.64762	0.93	4.20074	0.85	37	7	2	0	0	3	0	0	0	5'utr
NAB2	4	83	19	3.48958	0.89	3.69543	0.82	59	13	2	0	1	1	0	0	0	5'utr
NABP1	2	22	11	1.9	0.95	2.03342	1.02	19	9.5	0	1	0	0	0	0	0	5'utr-intron
NACA	2	47	23	1.83766	0.92	2.29003	1.15	36	18	2	0	0	0	0	0	0	5'utr
NACC1	14	188	10	12.1111	0.86	12.56	0.87	170	10	0	0	2	12	0	0	0	coding
NAF1	1	10	10	1	1	1	1	9	9	1	0	0	0	0	0	0	5'utr
NAGA	2	20	10	1.66667	0.83	1.51851	0.76	20	10	2	0	0	0	0	0	0	5'utr
NAP1L1	2	49	24	1.69865	0.85	2.32736	1.16	41	20.5	2	0	0	0	0	0	0	5'utr
NAPA	1	15	15	0.933333	0.93	1.14613	1.15	8	8	1	0	0	0	0	0	0	5'utr
NASP	2	33	16	1.81111	0.91	2.34439	1.17	23	11.5	2	0	0	0	0	0	0	5'utr
NAT14	3	39	10	2.72738	0.9	2.79934	0.85	33	9	0	0	1	2	0	0	0	coding
NAT8L	1	15	15	0.733333	0.73	0.740363	0.74	13	13	0	0	0	1	0	0	0	3'utr
NBN	1	10	10	0.8	0.8	0.90309	0.9	6	6	0	0	0	0	1	0	0	start_codon
NBPF1	2	202	101	1.85358	0.93	2.81569	1.41	118	59	1	0	0	0	0	0	0	5'utr
NBPF9	1	9	9	1	1	0.954243	0.95	5	5	1	0	0	0	0	0	0	5'utr
NCAPG	1	7	7	0.857143	0.86	0.778151	0.78	6	6	1	0	0	0	0	0	0	5'utr
NCAPH2	1	24	24	0.666667	0.67	0.90309	0.9	14	14	0	0	1	0	0	0	0	coding
NCK1-AS1	1	7	7	0.857143	0.86	0.778151	0.78	7	7	0	0	0	0	0	0	0	antisense
NCK2	2	24	12	1.3125	0.66	1.6902	0.85	18	9	2	0	0	0	0	0	0	5'utr
NCL	7	260	22	5.12738	0.71	7.62421	1.08	186	21	0	0	6	0	1	0	0	coding
NCLN	1	11	11	1	1	1.04139	1.04	5	5	0	0	0	1	0	0	0	3'utr
NCOA5	1	10	10	0.9	0.9	0.954243	0.95	7	7	1	0	0	0	0	0	0	5'utr
NCOR2	3	26	9	2.68889	0.89	2.35025	0.85	26	9	0	0	0	3	0	0	0	3'utr
NDC80	1	7	7	0.714286	0.71	0.69897	0.7	7	7	1	0	0	0	0	0	0	5'utr
NDE1	1	8	8	1	1	0.90309	0.9	7	7	0	0	0	1	0	0	0	3'utr
NDEL1	1	9	9	0.888889	0.89	0.90309	0.9	9	9	1	0	0	0	0	0	0	5'utr
NDFIP1	1	53	53	0.773585	0.77	1.01072	1.01	39	39	0	0	0	0	1	0	0	start_codon
NDOR1	1	7	7	0.857143	0.86	0.778151	0.78	7	7	0	0	0	1	0	0	0	3'utr
NDRG1	1	8	8	0.75	0.75	0.778151	0.78	6	6	1	0	0	0	0	0	0	5'utr
NDST3	1	10	10	0.9	0.9	0.954243	0.95	10	10	0	0	0	0	0	0	0	retained_intron
NDUFA1	1	7	7	1	1	0.845098	0.85	5	5	1	0	0	0	0	0	0	5'utr
NDUFA11	2	22	11	1.73333	0.87	1.95424	0.98	18	9	1	0	1	0	0	0	0	coding
NDUFA2	1	48	48	0.9375	0.94	1.65321	1.65	12	12	1	0	0	0	0	0	0	5'utr
NDUFA4	1	19	19	0.947368	0.95	1.25527	1.26	17	17	1	0	0	0	0	0	0	5'utr
NDUFA8	2	39	19	1.84857	0.92	2.17464	1.09	35	17.5	0	0	1	0	1	0	0	coding
NDUFAF4	1	28	28	0.964286	0.96	1.43136	1.43	23	23	1	0	0	0	0	0	0	5'utr
NDUFB1	1	10	10	1	1	1	1	9	9	0	0	1	0	0	0	0	coding
NDUFB10	1	18	18	0.888889	0.89	0.90309	0.9	15	15	1	0	0	0	0	0	0	5'utr
NDUFB2	1	7	7	1	1	0.845098	0.85	7	7	0	0	0	0	1	0	0	start_codon
NDUFB4	1	10	10	0.9	0.9	0.954243	0.95	8	8	0	0	0	0	1	0	0	start_codon
NDUFB6	1	16	16	0.875	0.88	0.845098	0.85	10	10	1	0	0	0	0	0	0	5'utr
NDUFB9	1	7	7	1	1	0.845098	0.85	7	7	1	0	0	0	0	0	0	5'utr
NDUFC1	1	8	8	0.625	0.63	0.69897	0.7	8	8	0	0	0	0	1	0	0	start_codon
NDUFS6	2	21	10	1.91667	0.96	1.99564	1	18	9	0	0	1	0	1	0	0	start_codon
NDUFV2	1	11	11	0.818182	0.82	0.653213	0.65	10	10	0	0	1	0	0	0	0	coding
NEK7	2	18	9	1.55	0.78	1.68124	0.84	12	6	2	0	0	0	0	0	0	5'utr
NELFB	2	34	17	1.76471	0.88	1.74819	0.87	32	16	2	0	0	0	0	0	0	5'utr
NETO2	4	64	16	3.44457	0.91	4.3927	1.2	45	11.5	3	0	0	0	1	0	0	start_codon
NF2	6	192	14	5.4021	0.91	6.14424	1.01	117	10.5	3	0	0	3	0	0	0	5'utr
NFAT5	1	42	42	0.928571	0.93	1.11394	1.11	22	22	1	0	0	0	0	0	0	5'utr
NFATC1	12	151	11	9.58054	0.85	11.3168	0.9	124	8.5	1	6	2	2	1	0	0	5'utr
NFATC3	1	19	19	0.842105	0.84	0.726999	0.73	18	18	0	0	0	0	0	0	0	processed_transcript
NFE2L1	10	116	9	8.93867	0.89	9.07193	0.87	95	8	3	0	5	2	0	0	0	5'utr
NFE2L2	1	12	12	1	1	1.07918	1.08	9	9	1	0	0	0	0	0	0	5'utr
NFIL3	1	7	7	0.857143	0.86	0.778151	0.78	6	6	1	0	0	0	0	0	0	5'utr
NFIX	4	32	8	3.49206	0.89	3.04922	0.77	31	8	2	1	0	1	0	0	0	5'utr
NFKB1	4	159	42	3.00646	0.78	4.59453	1.17	112	27	3	0	1	0	0	0	0	5'utr
NFKB2	2	27	13	1.89474	0.95	2.13354	1.07	20	10	1	0	0	0	0	0	0	5'utr
NFKBIB	1	16	16	0.875	0.88	0.845098	0.85	13	13	0	0	1	0	0	0	0	coding
NFKBID	1	7	7	0.571429	0.57	0.60206	0.6	7	7	0	0	1	0	0	0	0	coding
NFKBIE	1	20	20	0.85	0.85	0.929419	0.93	20	20	0	0	1	0	0	0	0	coding
NFYA	1	13	13	0.923077	0.92	1.07918	1.08	11	11	0	0	0	1	0	0	0	3'utr
NFYC	1	20	20	0.85	0.85	1.23045	1.23	16	16	1	0	0	0	0	0	0	5'utr
NGFRAP1	2	46	23	1.92105	0.96	2.44716	1.22	20	10	1	0	1	0	0	0	0	5'utr
NGRN	1	9	9	1	1	0.954243	0.95	6	6	0	1	0	0	0	0	0	intron
NHLRC2	2	23	11	1.90909	0.95	2.07918	1.04	19	9.5	2	0	0	0	0	0	0	5'utr
NHP2L1	1	11	11	1	1	1.04139	1.04	5	5	1	0	0	0	0	0	0	5'utr
NIP7	1	22	22	0.909091	0.91	1.30103	1.3	19	19	1	0	0	0	0	0	0	5'utr
NIPA2	2	17	8	1.88889	0.94	1.50515	0.75	16	8	2	0	0	0	0	0	0	5'utr
NIPBL	2	48	24	1.42735	0.71	1.92942	0.96	32	16	1	0	0	0	0	0	0	5'utr
[truncated: 1,575 more rows]

## Sheet: APB_REP2
GeneName	Sites	ReadCountSum	ReadCountMed	T2CFractionSum	T2CFractionMed	ConversionSpecificitySum	ConversionSpecificityMed	UniqueReadsSum	UniqueReadsMed	5'utr	Intron	Exon	3'utr	Start_codon	Stop_codon	Junction	GeneType
[truncated: 3,454 more rows]

[truncated: 16 more sheets: APD_REP1, APD_REP2, AP1_REP1, AP1_REP2, AP2_REP1, AP2_REP2, NPA_REP1, NPA_REP2, NPB_REP1, NPB_REP2, NPD_REP1, NPD_REP2, NP1_REP1, NP1_REP2, NP2_REP1, NP2_REP2]
